# Supplementary material for: Narrowing row spacing and adding inter-block promote the grain filling and flag leaf photosynthetic rate of wheat under enlarged drip tube spacing system
Source: Front Plant Sci. 2024 Jun 5;15:1368410. doi: 10.3389/fpls.2024.1368410 (PMC11188436; doi:10.3389/fpls.2024.1368410)
Supplement: Supplementary file 1 [file Table_1.xlsx]

## Sheet: Table2 and Table3
Index		2020													2021												2022												Index		2020
	Number	Weight per panicle of superior grain		Weight per panicle of inferior grains		Weight per panicle(g)		Grain yield		Weight	Number of grain	Thousand grains weight			Weight per panicle of superior grain		Weight per panicle of inferior grains		Weight per panicle(g)		Grain yield		Weight	Number of grain	Thousand grains weight		Weight per panicle of superior grain		Weight per panicle of inferior grains		Weight per panicle(g)		Grain yield		Weight	Number of grain	Thousand grains weight			Number	Weight per panicle of superior grain		Weight per panicle of inferior grains		Weight per panicle(g)		Grain yield		Weight
22TR6R11	37	22.79		8.81		29.3991		227.12		45.99	1121	41.0259			21.86		7.49		29.35		212.45		44.73	1108	40.37						29.38		164.91		41.77	1013	41.234		44TR6R11	106	26.92		11.71		36.4291		249.88		54.44
		1.10044		1.10044				230.59		39.34	953	41.2802									214.62		38.07	934	40.7602								206		43.32	1044	41.4943				1.10044		1.10044				223.11		52.61
		21.6896		7.70956						39.72	985	40.3249											38.43	962	39.948										40.41	997	40.5316				25.8196		10.6096						52.36
										48.2	1102	43.7387											46.89	1081	43.3765										48.72	1114	43.7343												52.39
										45.43	1064	42.6974											44.08	1045	42.1818										45.86	1074	42.7002												47.37
										44.95	1048	42.8912											43.62	1027	42.4732										45.73	1061	43.1008												51.57
								228.855				41.993									213.535				41.5183								185.455				42.1325										236.495
		1.08448		0.385478		1.46996		2542.83				41.993			1.093		0.3745		1.4675		2372.61				41.5183						1.469		2060.61				42.1325				1.29098		0.530478		1.82146		2627.72
Average																																							Average
22TR6R12	40	22.99		8.63		29.4191		223.91		52.21	1236	42.2411			21.6		7.62		29.22		208.94		50.93	1215	41.9177						29.88		173.49		46.65	1099	42.4477		44TR6R12	109	26.68		11.94		36.4191		259.12		53.97
		1.10044		1.10044				236.59		39.94	954	41.8658									221.62		38.65	935	41.3369								205.28		40.69	967	42.0786				1.10044		1.10044				228.04		52.04
		21.8896		7.52956						42.92	1028	41.751											41.61	1007	41.3208										43.64	1040	41.9615				25.5796		10.8396						51.05
										41.13	1007	40.8441											39.84	986	40.4057										42.32	1031	41.0475												47.34
										40.09	964	41.5871											38.78	943	41.1241										40.75	975	41.7949												49.01
										43.61	1033	42.2168											42.32	1008	41.9841										40.9	964	42.4274												45.96
								230.25				41.751									215.28				41.3482								189.385				41.9596										243.58
		1.09448		0.376478		1.47096		2558.33				41.751			1.08		0.381		1.461		2392				41.3482						1.494		2104.28				41.9596				1.27898		0.541978		1.82096		2706.44
Average																																							Average
22TR6R13	43	22.89		8.68		29.3691		232.62		46.73	1086	43.0295			21.64		7.14		28.78		217.68		45.41	1085	41.8525						29.6		172.48		54.31	1250	43.448		44TR6R13	112	26.74		12.02		36.5591		252.96		57.42
		1.10044		1.10044				233.25		42.43	960	44.1979									218.27		41.14	941	43.7194								198.99		43.37	972	44.6193				1.10044		1.10044				235.84		45.51
		21.7896		7.57956						40.22	1004	40.0598											38.94	986	39.4929										41.19	1018	40.4617				25.6396		10.9196						45.01
										41.74	1007	41.4499											40.42	989	40.8696										42.61	1018	41.8566												53.18
										40.71	1019	39.9509											39.4	997	39.5186										45.84	1136	40.3521												56.09
										35.67	862	41.3805											34.36	841	40.8561										36.56	875	41.7829												54.37
								232.935				41.6781									217.975				41.0515								185.735				42.0868										244.4
		1.08948		0.378978		1.46846		2588.17				41.6781			1.082		0.357		1.439		2421.94				41.0515						1.48		2063.72				42.0868				1.28198		0.545978		1.82796		2715.56
Average						1.46979		2563.11				41.8074							1.45583		2395.52				41.306								2076.2				42.0596		Average						1.82346		2683.24
22TR6R21	38	21.51		7.86		27.1691		215.22		46.32	1076	43.0483			20.53		6.36		26.89		199.85		44.98	1082	41.5712						27.06		162.58		53.99	1247	43.2959		44TR6R21	107	26.48		11.36		35.6391		237.39		57.31
		1.10044		1.10044				216.43		44.88	1019	44.0432									201.16		43.56	1049	41.5253								182.35		40.96	927	44.1855				1.10044		1.10044				235.06		53.91
		20.4096		6.75956						50.1	1173	42.711											49.81	1193	41.7519										50.95	1186	42.9595				25.3796		10.2596						49.89
										48.89	1174	41.644											47.59	1141	41.709										49.6	1184	41.8919												62.62
										52.76	1266	41.6746											47.38	1124	42.153										53.58	1278	41.9249												43.83
										48.22	1162	41.4974											46.88	1121	41.8198										48.97	1173	41.7477												42.16
								215.825				42.4364									200.505				41.755								172.465				42.6676										236.225
		1.02048		0.337978		1.35846		2398.06				42.4364			1.0265		0.318		1.3445		2227.83				41.755						1.353		1916.28				42.6676				1.26898		0.512978		1.78196		2624.72
Average																																							Average
22TR6R22	41	21.85		7.55		27.1991		215.18		45.07	1041	43.2949			20.24		6.51		26.75		204.17		41.76	1018	41.0216						27.91		166.04		47.76	1097	43.5369		44TR6R22	110	26.14		11.54		35.4791		235.44		47.1
		1.10044		1.10044				210.52		47.71	1130	42.2212									195.54		45.38	1107	40.9937								176.09		48.41	1140	42.4649				1.10044		1.10044				229.41		53.06
		20.7496		6.44956						42.64	983	43.3774											40.31	962	41.9023										43.37	994	43.6318				25.0396		10.4396						55.59
										46.95	1156	40.6142											46.61	1104	42.2192										39.68	971	40.8651												52.39
										41.39	938	44.1258											39.11	909	43.0253										42.2	951	44.3743												52.47
										39.56	917	43.1407											38.25	898	42.5947										44.69	1030	43.3883												56.04
								212.85				42.7957									199.855				41.9595								171.065				43.0436										232.425
		1.03748		0.322478		1.35996		2365				42.7957			1.012		0.3255		1.3375		2220.61				41.9595						1.3955		1900.72				43.0436				1.25198		0.521978		1.77396		2582.5
Average																																							Average
22TR6R23	44	21.78		7.25		26.8291		211.17		46.65	1086	42.9558			20.17		6.28		26.45		206.18		45.34	1056	42.9356						27.28		162		45.38	1050	43.219		44TR6R23	113	26.41		11.61		35.8191		226.48		46.72
		1.10044		1.10044				202.06		36.14	868	41.6359									187.05		36.81	849	43.3569								187.68		36.78	878	41.8907				1.10044		1.10044				241.51		43.48
		20.6796		6.14956						52.55	1235	42.5506											49.23	1214	40.5519										49.94	1167	42.7935				25.3096		10.5096						51.84
										48.9	1122	43.5829											47.6	1103	43.155										49.71	1134	43.836												55.98
										39.59	961	41.1967											40.27	942	42.7495										45.1	1088	41.4522												51.71
										44.93	1051	42.7498											41.56	1032	40.2713										45.65	1062	42.9849												48.94
								206.615				42.4453									196.615				42.17								174.84				42.6961										233.995
		1.03398		0.307478		1.34146		2295.72				42.4453			1.0085		0.314		1.3225		2184.61				42.17						1.364		1942.67				42.6961				1.26548		0.525478		1.79096		2599.94
Average		22.7833		8.55		1.35329		2352.93				42.5591							1.33483		2211.02				41.9615								1919.89				42.8024		Average						1.78229		2602.39
22TR6R31	39	19.57		6.22		23.5891		202.65		49.29	1123	43.8914			18.33		4.83		23.16		187.64		47.95	1098	43.6703						24.01		164.6		51.25	1160	44.181		44TR6R31	108	24.51		10.81		33.1191		227.57		55.53
		1.10044		1.10044				186.82		45.24	1036	43.668									172.12		43.87	997	44.002								138.8		41.06	934	43.9615				1.10044		1.10044				177.71		51.49
		18.4696		5.11956						45.07	1022	44.0998											43.76	999	43.8038										45.86	1033	44.395				23.4096		9.70956						47.64
										46.22	1085	42.5991											44.48	1064	41.8045										46.92	1094	42.8885												48.99
										40.06	942	42.5265											38.82	921	42.1498										40.68	950	42.8211												46.88
										45.16	1077	41.9313											43.87	1054	41.6224										46.01	1090	42.211												53.11
								194.735				43.1193									179.88				42.8421								151.7				43.4097										202.64
		0.923478		0.255978		1.17946		2163.72				43.1193			0.9165		0.2415		1.158		1998.67				42.8421						1.2005		1685.56				43.4097				1.17048		0.485478		1.65596		2251.56
Average																																							Average
22TR6R32	42	19.74		6.06		23.5991		217.45		49.2	1113	44.2049			18.54		4.77		23.31		202.78		47.85	1091	43.8588						24.15		124.57		52.95	1190	44.4958		44TR6R32	111	24.26		10.81		32.8691		215.82		53.85
		1.10044		1.10044				157.05		41.17	924	44.5563									148.25		39.84	903	44.1196								169.4		41.89	934	44.8501				1.10044		1.10044				185.85		50.33
		18.6396		4.95956						44.27	1009	43.8751											42.9	984	43.5976										44.99	1019	44.1511				23.1596		9.70956						49.17
										45.11	1048	43.0439											43.73	1011	43.2542										36.48	842	43.3254												43.03
										42.02	975	43.0974											40.64	945	43.0053										42.69	984	43.3841												44.31
										39.02	924	42.2294											37.67	901	41.8091										44.46	1046	42.5048												54.35
								187.25				43.5012									175.515				43.2741								146.985				43.7852										200.835
		0.931978		0.247978		1.17996		2080.56				43.5012			0.927		0.2385		1.1655		1950.17				43.2741						1.2075		1633.17				43.7852				1.15798		0.485478		1.64346		2231.5
Average																																							Average
22TR6R33	45	19.89		5.89		23.5791		171.01		48.1	1178	40.8319			17.96		4.94		22.9		157.62		47.56	1125	42.2756						23.19		137.28		46.17	1123	41.1131		44TR6R33	114	24.18		10.75		32.7291		192.21		57.03
		1.10044		1.10044				194.48		42.37	1051	40.314									180.23		42.15	1015	41.5271								176.18		43.15	1063	40.5927				1.10044		1.10044				208.16		43.57
		18.7896		4.78956						46.96	1151	40.7993											45.6	1120	40.7143										43.45	1058	41.0681				23.0796		9.64956						51.79
										43.47	960	45.2812											42.08	934	45.0535										44.12	968	45.5785												46.08
										37.74	834	45.2518											36.42	835	43.6168										51.55	1132	45.5389												49.86
										55.56	1224	45.3922											54.2	1189	45.5845										56.39	1234	45.6969												50.86
								182.745				42.9784									168.925				43.1286								156.73				43.2647										200.185
		0.939478		0.239478		1.17896		2030.5				42.9784			0.898		0.247		1.145		1876.94				43.1286						1.1595		1741.44				43.2647				1.15398		0.482478		1.63646		2224.28
Average		21.75		7.38333		1.17946		2091.59				43.1996							1.15617		1941.93				43.0816								1686.72				43.4865		Average						1.64529		2235.78
22TR6LR11	46	22.07		7.87		27.7391		167.67		45.27	1175	38.5277			20.78		6.56		27.34		155.63		43.97	1154	38.1023						27.69		155.05		39.22	1013	38.7167		44TR6LR11	115	26.27		11.65		35.7191		226.64		46.72
		1.10044		1.10044				211.01		43.88	1155	37.9913									195.98		42.58	1107	38.4643								156.96		44.57	1167	38.1919				1.10044		1.10044				246.08		44.04
		20.9696		6.76956						38.5	1033	37.2701											37.21	1001	37.1728										39.11	1044	37.4617				25.1696		10.5496						47.98
										50.11	1185	42.2869											48.8	1182	41.286										50.62	1197	42.2891												46.4
										41.07	975	42.1231											39.75	956	41.5795										41.53	986	42.1197												34.15
										40.63	980	41.4592											39.33	961	40.9261										41.37	993	41.6616												45.71
								189.34				39.943									175.805				39.5885								156.005				40.0734										236.36
		1.04848		0.338478		1.38696		2103.78				39.943			1.039		0.328		1.367		1953.39				39.5885						1.3845		1733.39				40.0734				1.25848		0.527478		1.78596		2626.22
Average																																							Average
22TR6LR12	49	21.92		7.89		27.6091		208.12		44.11	1100	40.1			20.44		6.92		27.36		193.14		42.82	1082	39.5749						27.85		129.99		42.39	1052	40.2947		44TR6LR12	118	26.24		11.35		35.3891		218.75		52.46
		1.10044		1.10044				182.65		46.24	1138	40.6327									167.85		44.79	1119	40.0268								179.19		46.88	1148	40.8362				1.10044		1.10044				242.78		45.91
		20.8196		6.78956						45.17	1137	39.7274											43.87	1118	39.2397										45.87	1149	39.9217				25.1396		10.2496						46.17
										38.87	960	40.4896											37.56	938	40.0426										44.03	1082	40.6932												45.03
										43.26	1096	39.4708											41.97	1069	39.261										43.91	1107	39.6658												44.73
										45.96	1154	39.8267											44.78	1133	39.5234										46.67	1166	40.0257												45.78
								195.385				40.0412									180.495				39.6114								154.59				40.2395										230.765
		1.04098		0.339478		1.38046		2170.94				40.0412			1.022		0.346		1.368		2005.5				39.6114						1.3925		1717.67				40.2395				1.25698		0.512478		1.76946		2564.06
Average																																							Average
22TR6LR13	52	22.15		7.76		27.7091		179.51		43.17	1038	41.5896			20.63		6.41		27.04		164.52		41.87	1024	40.8887						27.85		160.23		46.74	1113	41.9946		44TR6LR13	121	25.85		11.55		35.1991		218.92		44.8
		1.10044		1.10044				205.49		40.88	1010	40.4752									190.51		39.56	991	39.9193								146.89		41.81	1023	40.87				1.10044		1.10044				245.38		49.03
		21.0496		6.65956						41.28	1000	41.28											39.98	997	40.1003										40.51	972	41.677				24.7496		10.4496						50.32
										39.97	1053	37.9582											38.66	1028	37.607										40.81	1064	38.3553												46.57
										44.01	1071	41.0924											42.71	1056	40.4451										49.21	1186	41.4924												42.41
										38.78	965	40.1865											37.49	948	39.5464										39.61	976	40.584												43.09
								192.5				40.4303									177.515				39.7511								153.56				40.8289										232.15
		1.05248		0.332978		1.38546		2138.89				40.4303			1.0315		0.3205		1.352		1972.39				39.7511						1.3925		1706.22				40.8289				1.23748		0.522478		1.75996		2579.44
Average		22.6667		8.81667		1.38429		2137.87				40.1382							1.36233		1977.09				39.6503								1719.09				40.3806		Average						1.77179		2589.91
22TR6LR21	47	22.38		7.85		28.0291		241.15		51.6	1221	42.2604			20.89		6.65		27.54		216.52		50.31	1251	40.2158						28.14		169.96		45.94	1081	42.4977		44TR6LR21	116	25.52		11.64		34.9591		214.64		50.96
		1.10044		1.10044				193.31		46.61	1117	41.7278									178.63		45.31	1098	41.2659								174.51		49.07	1172	41.8686				1.10044		1.10044				234.43		51.19
		21.2796		6.74956						43.99	1038	42.3796											42.63	1028	41.4689										44.54	1045	42.622				24.4196		10.5396						52.87
										38.59	931	41.4501											39.35	923	42.6327										39.28	942	41.6985												51.15
										37.98	927	40.9709											36.45	901	40.455										38.62	937	41.2166												44.35
										42.45	1046	40.5832											40.73	1027	39.6592										43.18	1058	40.8129												46.07
								217.23				41.562									197.575				40.9496								172.235				41.7861										224.535
		1.06398		0.337478		1.40146		2413.67				41.562			1.0445		0.3325		1.377		2195.28				40.9496						1.407		1913.72				41.7861				1.22098		0.526978		1.74796		2494.83
Average																																							Average
22TR6LR22	50	22.31		8.01		28.1191		226.93		50.8	1226	41.4356			21.39		6.81		28.2		211.84		49.49	1205	41.0705						28.62		165.32		50.93	1222	41.6776		44TR6LR22	119	25.66		11.25		34.7091		220.96		53.25
		1.10044		1.10044				202.34		47.13	1114	42.307									187.36		45.82	1095	41.8447								171.67		47.83	1124	42.5534				1.10044		1.10044				241.65		48.67
		21.2096		6.90956						41.63	1012	41.1364											40.31	991	40.6761										42.39	1024	41.3965				24.5596		10.1496						51.02
										56.19	1350	41.6222											54.84	1329	41.2641										46.43	1109	41.8665												45.78
										42.93	1028	41.7607											41.63	1007	41.3406										43.6	1038	42.0039												57.03
										48.39	1161	41.6796											47.09	1142	41.2347										47.46	1132	41.9258												44.98
								214.635				41.6569									199.6				41.2385								168.495				41.9039										231.305
		1.06048		0.345478		1.40596		2384.83				41.6569			1.0695		0.3405		1.41		2217.78				41.2385						1.431		1872.17				41.9039				1.22798		0.507478		1.73546		2570.06
Average																																							Average
22TR6LR23	53	22.31		7.96		28.0691		219.85		52.4	1211	43.27			20.92		6.84		27.76		204.83		51.1	1199	42.6188						27.85		141.13		53.89	1238	43.5299		44TR6LR23	122	25.82		11.41		35.0291		221.94		45.59
		1.10044		1.10044				197.18		41.19	961	42.8616									182.17		39.85	948	42.0359								203.25		41.91	972	43.1173				1.10044		1.10044				240.83		50.43
		21.2096		6.85956						45.44	1071	42.4276											44.13	1052	41.9487										58.12	1362	42.6725				24.7196		10.3096						44.58
										42.44	1023	41.4858											41.1	1004	40.9363										43.19	1035	41.7295												53.41
										45.35	1098	41.3024											44.04	1079	40.8156										51.14	1231	41.5435												53.33
										42.5	1025	41.4634											41.15	1004	40.9861										43.29	1038	41.7052												55.36
								208.515				42.1351									193.5				41.5569								172.19				42.383										231.385
		1.06048		0.342978		1.40346		2316.83				42.1351			1.046		0.342		1.388		2150				41.5569						1.3925		1913.22				42.383				1.23598		0.515478		1.75146		2570.94
Average		22.4333		8.5		1.40362		2371.78				41.7847							1.39167		2187.69				41.2483								1899.7				42.0243		Average		24.9833		12.1833		1.74496		2545.28
22TR6LR31	48	23.06		8.85		29.7091		196.51		48.24	1083	44.5429			21.53		7.57		29.1		182.21		46.87	1063	44.0922						29.41		164.53		44.97	1003	44.8355		44TR6LR31	117	26.94		11.73		36.4691		223.58		56.08
		1.10044		1.10044				246.15		43.37	970	44.7113									231.14		42.03	952	44.1492								200.02		48.97	1088	45.0092				1.10044		1.10044				250.78		54.55
		21.9596		7.74956						38.91	886	43.9165											37.56	862	43.5731										39.74	899	44.2047				25.8396		10.6296						53.32
										48.43	1075	45.0512											46.97	1054	44.5636										49.3	1087	45.3542												52.91
										48.53	1071	45.3128											47.19	1052	44.8574										49.53	1086	45.6077												48.87
										49.81	1116	44.6326											48.45	1095	44.2466										50.64	1127	44.9335												50.05
								221.33				44.6946									206.675				44.247								182.275				44.9908										237.18
		1.09798		0.387478		1.48546		2459.22				44.6946			1.0765		0.3785		1.455		2296.39				44.247						1.4705		2025.28				44.9908				1.29198		0.531478		1.82346		2635.33
Average																																							Average
22TR6LR32	51	23.14		8.77		29.7091		222.52		45.84	1013	45.2517			21.61		6.96		28.57		207.54		44.51	994	44.7787						29.74		158.41		58.21	1278	45.5477		44TR6LR32	120	26.63		11.92		36.3491		232.62		42.84
		1.10044		1.10044				231.71		40.44	881	45.9024									215.35		39.16	888	44.0991								209.05		41.3	894	46.1969				1.10044		1.10044				254.61		42.72
		22.0396		7.66956						40.26	873	46.1168											39.23	854	45.9368										41.07	885	46.4068				25.5296		10.8196						41.88
										55.29	1235	44.7692											53.88	1214	44.3822										52.01	1154	45.0693												53.2
										45.55	1019	44.7007											44.12	998	44.2084										46.34	1030	44.9903												52.21
										48.46	1076	45.0372											46.37	1053	44.0361										44.47	981	45.3313												54.54
								227.115				45.2963									211.445				44.5735								183.73				45.5904										243.615
		1.10198		0.383478		1.48546		2523.5				45.2963			1.0805		0.348		1.4285		2349.39				44.5735						1.487		2041.44				45.5904				1.27648		0.540978		1.81746		2706.83
Average																																							Average
22TR6LR33	54	23.53		8.46		29.7891		215.46		55.23	1270	43.4882			22.28		7.37		29.65		200.45		53.86	1245	43.261						29.33		188.41		45	1028	43.7743		44TR6LR33	123	26.65		11.82		36.2691		227.32		60.79
		1.10044		1.10044				238.88		48.83	1102	44.3103									222.45		47.46	1075	44.1488								172		49.83	1117	44.6106				1.10044		1.10044				264.13		47.2
		22.4296		7.35956						43.06	991	43.4511											42.05	964	43.6203										54.55	1247	43.745				25.5496		10.7196						49.49
										50.61	1134	44.6296											49.36	1118	44.1503										51.44	1145	44.9258												55.56
										51.69	1141	45.3024											50.44	1128	44.7163										50.16	1100	45.6												54.71
										37.78	855	44.1871											37.54	834	45.012										38.62	868	44.4931												54.13
								227.17				44.2281									211.45				44.1515								180.205				44.5248										245.725
		1.12148		0.367978		1.48946		2524.11				44.2281			1.114		0.3685		1.4825		2349.44				44.1515						1.4665		2002.28				44.5248				1.27748		0.535978		1.81346		2730.28
Average		23.8833		9.91667		1.48679		2502.28				44.7397							1.45533		2331.74				44.324								2023				45.0353		Average						1.81812		2690.81
22TR6SR11	55	21.88		7.82		27.4991		192.54		35.8	839	42.6698			20.45		6.55		27		177.56		34.49	819	42.1123						27.51		155.42		45.23	1054	42.9127		44TR6SR11	124	25.7		11.26		34.7591		202.94		43.84
		1.10044		1.10044				179.53		51.77	1235	41.919									174.85		50.45	1215	41.5226								157.87		54.1	1286	42.0684				1.10044		1.10044				217.49		44.36
		20.7796		6.71956						40.83	973	41.963											39.55	953	41.5005										41.58	985	42.2132				24.5996		10.1596						45.86
										48.57	1122	43.2888											47.23	1102	42.8584										49.41	1135	43.533												45.79
										41.05	970	42.3196											39.74	950	41.8316										41.85	983	42.5738												45.58
										39.64	932	42.5322											39.52	912	43.3333										40.4	944	42.7966												43.97
								186.035				42.4487									176.205				42.1931								156.645				42.683										210.215
		1.03898		0.335978		1.37496		2325.44				42.4487			1.0225		0.3275		1.35		2202.56				42.1931						1.3755		1958.06				42.683				1.22998		0.507978		1.73796		2627.69
Average																																							Average
22TR6SR12	58	22.06		7.84		27.6991		209.29		46.57	1104	42.183			21.04		6.23		27.27		193.54		46.05	1084	42.4815						27.86		145.05		44.47	1048	42.4332		44TR6SR12	127	25.49		11.28		34.5691		213.13		50.49
		1.10044		1.10044				184.37		44.4	1028	43.1907									169.34		41.63	1008	41.2996								157.44		45.13	1039	43.436				1.10044		1.10044				206.89		49.24
		20.9596		6.73956						46.07	1042	44.2131											42.62	1022	41.7025										46.69	1050	44.4667				24.3896		10.1796						44.7
										39.87	947	42.1014											39.38	927	42.4811										42.6	1006	42.3459												46
										39.8	922	43.167											38.37	902	42.5388										40.55	934	43.4154												40.79
										54.9	1275	43.0588											52.88	1255	42.1355										53.92	1245	43.3092												45.09
								196.83				42.9857									181.44				42.1065								151.245				43.2344										210.01
		1.04798		0.336978		1.38496		2460.38				42.9857			1.052		0.3115		1.3635		2268				42.1065						1.393		1890.56				43.2344				1.21948		0.508978		1.72846		2625.12
Average																																							Average
22TR6SR13	61	22.23		7.59		27.6191		195.24		42.44	1034	41.0445			20.16		6.58		26.74		180.24		41.06	1013	40.5331						27.72		140.37		46.16	1118	41.288		44TR6SR13	130	25.19		11.55		34.5391		190.98		48.65
		1.10044		1.10044				182.73		43.82	1074	40.8007									167.73		42.43	1045	40.6029								167.12		44.61	1087	41.0396				1.10044		1.10044				221.03		51.71
		21.1296		6.48956						46.31	1041	44.4861											42.53	1019	41.737										42.9	959	44.7341				24.0896		10.4496						48.18
										44.59	1007	44.28											41.61	997	41.7352										45.29	1017	44.5329												50.61
										41.65	997	41.7753											40.44	978	41.3497										35.8	852	42.0188												54.01
										44.26	1017	43.5202											42.98	997	43.1093										45.09	1030	43.7767												46.05
								188.985				42.6511									173.985				41.5112								153.745				42.8983										206.005
		1.05648		0.324478		1.38096		2362.31				42.6511			1.008		0.329		1.337		2174.81				41.5112						1.386		1921.81				42.8983				1.20448		0.522478		1.72696		2575.06
Average		22.7167		8.85		1.38029		2382.71				42.6952							1.35017		2215.12				41.9369								1923.48				42.9386		Average						1.73112		2609.29
22TR6SR21	56	21.85		8.01		27.6591		199.66		50.43	1140	44.2368			20.79		6.77		27.56		184.66		49.08	1120	43.8214						27.69		136.7		51.39	1154	44.5321		44TR6SR21	125	25.53		11.19		34.5191		209.19		56.46
		1.10044		1.10044				189.61		48.33	1095	44.137									194.61		46.98	1075	43.7023								181.49		46.29	1042	44.4242				1.10044		1.10044				226.94		48.72
		20.7496		6.90956						49.68	1145	43.3886											48.33	1125	42.96										50.58	1158	43.6788				24.4296		10.0896						48.11
										51.92	1192	43.557											50.57	1172	43.1485										52.79	1204	43.8455												49.1
										46.35	1080	42.9167											45	1060	42.4528										47.1	1090	43.211												54.63
										45.33	1083	41.856											43.98	1063	41.3735										46.21	1097	42.124												48.46
								194.635				43.3487									189.635				42.9098								159.095				43.6359										218.065
		1.03748		0.345478		1.38296		2432.94				43.3487			1.0395		0.3385		1.378		2370.44				42.9098						1.3845		1988.69				43.6359				1.22148		0.504478		1.72596		2725.81
Average																																							Average
22TR6SR22	59	22.05		8.09		27.9391		198.63		47.8	1108	43.1408			20.76		6.73		27.49		173.61		46.45	1088	42.693						28.03		154.93		52.15	1201	43.4221		44TR6SR22	128	25.22		11.45		34.4691		209.53		56.24
		1.10044		1.10044				186.36		40.44	938	43.113									195.21		39.09	918	42.5817								174.48		41.14	948	43.3966				1.10044		1.10044				231.99		52.05
		20.9496		6.98956						40.11	926	43.3153											38.76	906	42.7815										40.9	938	43.6034				24.1196		10.3496						53.11
										43.51	973	44.7174											42.16	953	44.2392										51.48	1144	45												50.64
										48.46	1152	42.066											47.11	1032	45.6492										49.34	1164	42.3883												47.79
										46.13	1032	44.6996											44.78	1012	44.249										49.72	1105	44.9955												52.68
								192.495				43.5087									184.41				43.6989								164.705				43.801										220.76
		1.04748		0.349478		1.39696		2406.19				43.5087			1.038		0.3365		1.3745		2305.12				43.6989						1.4015		2058.81				43.801				1.20598		0.517478		1.72346		2759.5
Average																																							Average
22TR6SR23	62	22.21		7.86		27.8691		183.36		51.96	1189	43.7006			20.59		6.74		27.33		193.43		50.61	1169	43.2934						27.55		156.58		49.27	1120	43.9911		44TR6SR23	131	25.29		11.35		34.4391		208.41		56.72
		1.10044		1.10044				200.63		43.38	986	43.9959									185.63		42.03	966	43.5093								173.58		44.16	997	44.2929				1.10044		1.10044				228.69		61.96
		21.1096		6.75956						49.15	1142	43.0385											47.8	1122	42.6025										42.72	986	43.3266				24.1896		10.2496						56.64
										37.48	864	43.3796											36.13	844	42.8081										38.21	875	43.6686												59.2
										47.46	1133	41.8888											46.11	1113	41.4286										48.57	1152	42.1615												54.05
										37.19	871	42.698											35.84	851	42.1152										37.87	881	42.9852												57.14
								191.995				43.1169									189.53				42.6262								165.08				43.4043										218.55
		1.05548		0.337978		1.39346		2399.94				43.1169			1.0295		0.337		1.3665		2369.12				42.6262						1.3775		2063.5				43.4043				1.20948		0.512478		1.72196		2731.88
Average		22.6667		8.8		1.39112		2413.02				43.3248							1.373		2348.23				43.0783								2037				43.6137		Average						1.72379		2739.06
22TR6SR31	57	22.59		8.06		28.4491		253.66		50.51	1111	45.4635			21.34		6.97		28.31		238.66		49.24	1121	43.9251						28.6		139.26		42.23	923	45.753		22TR6SR31	126	26.33		11.82		35.9491		222.24		54.81
		1.10044		1.10044				193.56		48.59	1091	44.5371									178.56		47.25	1071	44.1176								221.25		45.63	1032	44.2151				1.10044		1.10044				235.83		55.16
		21.4896		6.95956						50.55	1135	44.5374											49.13	1115	44.0628										51.43	1147	44.8387				25.2296		10.7196						50.77
										49.58	1170	42.3761											48.97	1130	43.3363										50.35	1180	42.6695												53.44
										44.1	1039	42.4447											42.74	1009	42.3588										44.97	1052	42.7471												53.38
										43.81	990	44.2525											42.47	970	43.7835										44.73	1004	44.5518												44.14
								223.61				43.9352									208.61				43.5973								180.255				44.1292										229.035
		1.07448		0.347978		1.42246		2795.12				43.9352			1.067		0.3485		1.4155		2607.62				43.5973						1.43		2253.19				44.1292				1.26148		0.535978		1.79746		2862.94
Average																																							Average
22TR6SR32	60	22.36		8.28		28.4391		194.97		62.99	1436	43.8649			21.21		6.85		28.06		179.97		61.68	1425	43.2842						29.02		136.83		46.85	1061	44.1565		22TR6SR32	129	26.35		11.68		35.8291		220.54		53.3
		1.10044		1.10044				233.71		49.91	1125	44.3644									208.71		47.1	1102	42.7405								193.84		50.85	1139	44.6444				1.10044		1.10044				235.34		54.18
		21.2596		7.17956						42.94	951	45.1525											41.6	932	44.6352										43.67	961	45.4422				25.2496		10.5796						50.05
										44.61	991	45.0151											43.26	965	44.829										40.77	900	45.3												53.8
										43.86	963	45.5452											41.26	943	43.754										44.74	976	45.8402												45.15
										43.93	1021	43.0264											42.58	1002	42.495										47.81	1104	43.3062												51.2
								214.34				44.4948									194.34				43.623								165.335				44.7816										227.94
		1.06298		0.358978		1.42196		2679.25				44.4948			1.0605		0.3425		1.403		2429.25				43.623						1.451		2066.69				44.7816				1.26248		0.528978		1.79146		2849.25
Average																																							Average
22TR6SR33	63	22.85		7.94		28.5891		208.53		47.45	1050	45.1905			21.46		6.74		28.2		193.53		46.12	1031	44.7333						28.57		139.77		65.96	1450	45.4897		22TR6SR33	132	26.89		11.41		36.0991		224.71		53.96
		1.10044		1.10044				220.97		33.77	811	41.64									215.97		34.6	802	43.1421								223.93		34.42	821	41.9245				1.10044		1.10044				221.61		49.45
		21.7496		6.83956						38.6	910	42.4176											37.38	887	42.1421										42.87	1004	42.6992				25.7896		10.3096						53.33
										40.79	930	43.8602											39.51	901	43.8513										41.64	943	44.1569												51.73
										40.44	888	45.5405											38.18	902	42.3282										51.46	1123	45.8237												49.81
										49.36	1095	45.0776											47.2	1078	43.7848										50.18	1106	45.3707												57.19
								214.75				43.9544									204.75				43.3303								181.85				44.2441										223.16
		1.08748		0.341978		1.42946		2684.38				43.9544			1.073		0.337		1.41		2559.38				43.3303						1.4285		2273.12				44.2441				1.28948		0.515478		1.80496		2789.5
Average		22.8333		8.96667		1.42462		2719.58				44.1281							1.4095		2532.08				43.5169								2197.67				44.385		Average						1.79796		2833.9
22TR4R11	64	23.91		9.39		31.0991		235.81		48.15	1091	44.1338			22.19		7.83		30.02		220.78		46.88	1072	43.7313						32.01		184.93		43.68	984	44.3902		22TR4R11	133	27.09		12.05		36.9391		239.99		52.5
		1.10044		1.10044				234.61		42.35	956	44.2992									219.62		40.93	937	43.682								197.1		46.28	1041	44.4573				1.10044		1.10044				245.86		53.1
		22.8096		8.28956						47.51	1073	44.2777											46.15	1054	43.7856										48.28	1084	44.5387				25.9896		10.9496						51.86
										43.25	979	44.1777											41.9	960	43.6458										43.91	988	44.4433												55.71
										42.71	1001	42.6673											41.41	982	42.169										43.53	1014	42.929												53.21
										44.49	1011	44.0059											43.14	992	43.4879										45.33	1024	44.2676												55.27
								235.21				43.927									220.2				43.4169								191.015				44.171										242.925
		1.14048		0.414478		1.55496		3920.17				43.927			1.1095		0.3915		1.501		3670				43.4169						1.6005		3183.58				44.171				1.29948		0.547478		1.84696		4048.75
Average																																							Average
22TR4R12	66	23.74		9.38		30.9191		236.28		46	1065	43.1925			22.68		7.77		30.45		231.29		44.69	1042	42.8887						30.89		174.29		43.92	1011	43.4421		22TR4R12	135	26.99		12.17		36.9591		243.92		47.14
		1.10044		1.10044				226.74		43.07	1008	42.7282									211.73		41.76	978	42.6994								214.26		43.93	1022	42.9843				1.10044		1.10044				257.96		46.21
		22.6396		8.27956						41.49	947	43.812											40.18	917	43.8168										42.35	961	44.0687				25.8896		11.0696						45.26
										42.1	933	45.1233											40.69	921	44.1802										43.47	958	45.3758												51.43
										35.15	823	42.7096											35.65	813	43.8499										35.84	834	42.9736												45.55
										44.27	1027	43.1061											42.94	1007	42.6415										41.89	966	43.3644												48.25
								231.51				43.4453									221.51				43.3461								194.275				43.7015										250.94
		1.13198		0.413978		1.54596		3858.5				43.4453			1.134		0.3885		1.5225		3691.83				43.3461						1.5445		3237.92				43.7015				1.29448		0.553478		1.84796		4182.33
Average																																							Average
22TR4R13	68	23.91		9.33		31.0391		234.24		43.93	999	43.974			22.51		7.72		30.23		219.24		42.62	980	43.4898						31.1		176.24		47.64	1077	44.234		22TR4R13	137	27.28		12.48		37.5591		255.57		61.2
		1.10044		1.10044				233.44		48.86	1090	44.8257									228.43		47.55	1069	44.4808								207.21		49.64	1101	45.0863				1.10044		1.10044				245.16		56.39
		22.8096		8.22956						42.46	972	43.6831											41.04	953	43.064										41.52	945	43.9365				26.1796		11.3796						51.07
										50.44	1134	44.4797											49.01	1111	44.1134										51.23	1145	44.7424												50.17
										42.3	949	44.5732											40.89	925	44.2054										49.5	1104	44.837												45.28
										40.95	925	44.2703											38.63	906	42.638										41.85	940	44.5213												48.2
								233.84				44.301									223.835				43.6652								191.725				44.5596										250.365
		1.14048		0.411478		1.55196		3897.33				44.301			1.1255		0.386		1.5115		3730.58				43.6652						1.555		3195.42				44.5596				1.30898		0.568978		1.87796		4172.75
Average		24.1		10.3167		1.55096		3892				43.8911							1.51167		3697.47				43.4761								3205.64				44.144		Average						1.85762		4134.61
22TR4R21	65	23.99		9.12		30.9091		238.51		45.03	989	45.5308			21.98		7.83		29.81		216.54		43.7	965	45.285						30.88		180.68		42.26	922	45.8351		22TR4R21	134	27.29		11.99		37.0791		245.19		51.62
		1.10044		1.10044				231.54		42.55	946	44.9789									218.86		41.22	924	44.6104								200		47.92	1073	44.6598				1.10044		1.10044				245.51		51.78
		22.8896		8.01956						44.86	965	46.487											43.56	961	45.3278										45.67	976	46.793				26.1896		10.8896						48.62
										41.83	966	43.3023											41.27	951	43.3964										42.58	977	43.5824												49.98
										37.56	858	43.7762											36.72	837	43.871										38.4	871	44.0873												52.73
										47.2	1105	42.7149											46.07	1084	42.5										48.07	1118	42.9964												57.61
								235.025				44.465									217.7				44.1651								190.34				44.659										245.35
		1.14448		0.400978		1.54546		3917.08				44.465			1.099		0.3915		1.4905		3628.33				44.1651						1.544		3172.33				44.659				1.30948		0.544478		1.85396		4089.17
Average																																							Average
22TR4R22	67	23.59		9.58		30.9691		230.66		43.34	992	43.6895			22.43		7.68		30.11		226.66		42.11	973	43.2785						31.19		182.98		53.56	1218	43.9737		22TR4R22	136	27.06		12.45		37.3091		254.11		55.52
		1.10044		1.10044				234.32		42.95	1023	41.9844									215.36		42.06	1002	41.976								204.12		43.79	1036	42.2683				1.10044		1.10044				248.33		49.69
		22.4896		8.47956						44.94	1066	42.1576											44.03	1045	42.134										45.72	1077	42.4513				25.9596		11.3496						56.73
										53.49	1176	45.4847											51.97	1154	45.0347										37.63	822	45.7786												52
										53.86	1196	45.0334											52.46	1173	44.7229										54.72	1207	45.3355												50.55
										46.98	1059	44.3626											45.66	1038	43.9884										42.82	959	44.6507												49.16
								232.49				43.7854									221.01				43.5224								193.55				44.0764										251.22
		1.12448		0.423978		1.54846		3874.83				43.7854			1.1215		0.384		1.5055		3683.5				43.5224						1.5595		3225.83				44.0764				1.29798		0.567478		1.86546		4187
Average																																							Average
22TR4R23	69	24.01		9.32		31.1291		235.54		54.31	1203	45.1455			22.8		7.8		30.6		228.56		53.97	1183	45.6213						30.9		175.81		45.77	1007	45.4518		22TR4R23	138	26.79		12.44		37.0291		236.35		68.16
		1.10044		1.10044				229.22		51.62	1137	45.4002									217.45		50.28	1122	44.8128								203.31		52.42	1147	45.7018				1.10044		1.10044				258.74		52
		22.9096		8.21956						41.29	910	45.3736											39.94	887	45.0282										54.22	1187	45.6782				25.6896		11.3396						58.56
										43.82	1006	43.5586											44.12	982	44.9287										44.74	1020	43.8627												53.76
										35.43	808	43.849											35.1	789	44.4867										44.29	1003	44.1575												52.8
										41.68	940	44.3404											40.34	921	43.8002										42.54	953	44.638												62.57
								232.38				44.6112									223.005				44.7797								189.56				44.915										247.545
		1.14548		0.410978		1.55646		3873				44.6112			1.14		0.39		1.53		3716.75				44.7797						1.545		3159.33				44.915				1.28448		0.566978		1.85146		4125.75
Average		23.9667		10.1833		1.55012		3888.31				44.2872							1.50867		3676.19				44.1557								3185.83				44.5501		Average						1.85696		4133.97
TR4R1		1.14048		0.414478		1.55496		3920.17				43.927		TR4R1	1.1095		0.3915		1.501		3670				43.4169					TR4R1	1.6005		3183.58				44.171		TR4R1		1.29948		0.547478		1.84696		4048.75
TR4R1		1.13198		0.413978		1.54596		3858.5				43.4453		TR4R1	1.134		0.3885		1.5225		3691.83				43.3461					TR4R1	1.5445		3237.92				43.7015		TR4R1		1.29448		0.553478		1.84796		4182.33
TR4R1		1.14048		0.411478		1.55196		3897.33				44.301		TR4R1	1.1255		0.386		1.5115		3730.58				43.6652					TR4R1	1.555		3195.42				44.5596		TR4R1		1.30898		0.568978		1.87796		4172.75
TR4R2		1.14448		0.400978		1.54546		3917.08				44.465		TR4R2	1.099		0.3915		1.4905		3628.33				44.1651					TR4R2	1.544		3172.33				44.659		TR4R2		1.30948		0.544478		1.85396		4089.17
TR4R2		1.12448		0.423978		1.54846		3874.83				43.7854		TR4R2	1.1215		0.384		1.5055		3683.5				43.5224					TR4R2	1.5595		3225.83				44.0764		TR4R2		1.29798		0.567478		1.86546		4187
TR4R2		1.14548		0.410978		1.55646		3873				44.6112		TR4R2	1.14		0.39		1.53		3716.75				44.7797					TR4R2	1.545		3159.33				44.915		TR4R2		1.28448		0.566978		1.85146		4125.75
TR6R1		1.08448		0.385478		1.46996		2542.83				41.993		TR6R1	1.093		0.3745		1.4675		2372.61				41.5183					TR6R1	1.469		2060.61				42.1325		TR6R1		1.29098		0.530478		1.82146		2627.72
TR6R1		1.09448		0.376478		1.47096		2558.33				41.751		TR6R1	1.08		0.381		1.461		2392				41.3482					TR6R1	1.494		2104.28				41.9596		TR6R1		1.27898		0.541978		1.82096		2706.44
TR6R1		1.08948		0.378978		1.46846		2588.17				41.6781		TR6R1	1.082		0.357		1.439		2421.94				41.0515					TR6R1	1.48		2063.72				42.0868		TR6R1		1.28198		0.545978		1.82796		2715.56
TR6R2		1.02048		0.337978		1.35846		2398.06				42.4364		TR6R2	1.0265		0.318		1.3445		2227.83				41.755					TR6R2	1.353		1916.28				42.6676		TR6R2		1.26898		0.512978		1.78196		2624.72
TR6R2		1.03748		0.322478		1.35996		2365				42.7957		TR6R2	1.012		0.3255		1.3375		2220.61				41.9595					TR6R2	1.3955		1900.72				43.0436		TR6R2		1.25198		0.521978		1.77396		2582.5
TR6R2		1.03398		0.307478		1.34146		2295.72				42.4453		TR6R2	1.0085		0.314		1.3225		2184.61				42.17					TR6R2	1.364		1942.67				42.6961		TR6R2		1.26548		0.525478		1.79096		2599.94
TR6R3		0.923478		0.255978		1.17946		2163.72				43.1193		TR6R3	0.9165		0.2415		1.158		1998.67				42.8421					TR6R3	1.2005		1685.56				43.4097		TR6R3		1.17048		0.485478		1.65596		2251.56
TR6R3		0.931978		0.247978		1.17996		2080.56				43.5012		TR6R3	0.927		0.2385		1.1655		1950.17				43.2741					TR6R3	1.2075		1633.17				43.7852		TR6R3		1.15798		0.485478		1.64346		2231.5
TR6R3		0.939478		0.239478		1.17896		2030.5				42.9784		TR6R3	0.898		0.247		1.145		1876.94				43.1286					TR6R3	1.1595		1741.44				43.2647		TR6R3		1.15398		0.482478		1.63646		2224.28
TRL6R1		1.04848		0.338478		1.38696		2103.78				39.943		TRL6R1	1.039		0.328		1.367		1953.39				39.5885					TRL6R1	1.3845		1733.39				40.0734		TRL6R1		1.25848		0.527478		1.78596		2626.22
TRL6R1		1.04098		0.339478		1.38046		2170.94				40.0412		TRL6R1	1.022		0.346		1.368		2005.5				39.6114					TRL6R1	1.3925		1717.67				40.2395		TRL6R1		1.25698		0.512478		1.76946		2564.06
TRL6R1		1.05248		0.332978		1.38546		2138.89				40.4303		TRL6R1	1.0315		0.3205		1.352		1972.39				39.7511					TRL6R1	1.3925		1706.22				40.8289		TRL6R1		1.23748		0.522478		1.75996		2579.44
TRL6R2		1.06398		0.337478		1.40146		2413.67				41.562		TRL6R2	1.0445		0.3325		1.377		2195.28				40.9496					TRL6R2	1.407		1913.72				41.7861		TRL6R2		1.22098		0.526978		1.74796		2494.83
TRL6R2		1.06048		0.345478		1.40596		2384.83				41.6569		TRL6R2	1.0695		0.3405		1.41		2217.78				41.2385					TRL6R2	1.431		1872.17				41.9039		TRL6R2		1.22798		0.507478		1.73546		2570.06
TRL6R2		1.06048		0.342978		1.40346		2316.83				42.1351		TRL6R2	1.046		0.342		1.388		2150				41.5569					TRL6R2	1.3925		1913.22				42.383		TRL6R2		1.23598		0.515478		1.75146		2570.94
TRL6R3		1.09798		0.387478		1.48546		2459.22				44.6946		TRL6R3	1.0765		0.3785		1.455		2296.39				44.247					TRL6R3	1.4705		2025.28				44.9908		TRL6R3		1.29198		0.531478		1.82346		2635.33
TRL6R3		1.10198		0.383478		1.48546		2523.5				45.2963		TRL6R3	1.0805		0.348		1.4285		2349.39				44.5735					TRL6R3	1.487		2041.44				45.5904		TRL6R3		1.27648		0.540978		1.81746		2706.83
TRL6R3		1.12148		0.367978		1.48946		2524.11				44.2281		TRL6R3	1.114		0.3685		1.4825		2349.44				44.1515					TRL6R3	1.4665		2002.28				44.5248		TRL6R3		1.27748		0.535978		1.81346		2730.28
TRS6R1		1.03898		0.335978		1.37496		2325.44				42.4487		TRS6R1	1.0225		0.3275		1.35		2202.56				42.1931					TRS6R1	1.3755		1958.06				42.683		TRS6R1		1.22998		0.507978		1.73796		2627.69
TRS6R1		1.04798		0.336978		1.38496		2460.38				42.9857		TRS6R1	1.052		0.3115		1.3635		2268				42.1065					TRS6R1	1.393		1890.56				43.2344		TRS6R1		1.21948		0.508978		1.72846		2625.12
TRS6R1		1.05648		0.324478		1.38096		2362.31				42.6511		TRS6R1	1.008		0.329		1.337		2174.81				41.5112					TRS6R1	1.386		1921.81				42.8983		TRS6R1		1.20448		0.522478		1.72696		2575.06
TRS6R2		1.03748		0.345478		1.38296		2432.94				43.3487		TRS6R2	1.0395		0.3385		1.378		2370.44				42.9098					TRS6R2	1.3845		1988.69				43.6359		TRS6R2		1.22148		0.504478		1.72596		2725.81
TRS6R2		1.04748		0.349478		1.39696		2406.19				43.5087		TRS6R2	1.038		0.3365		1.3745		2305.12				43.6989					TRS6R2	1.4015		2058.81				43.801		TRS6R2		1.20598		0.517478		1.72346		2759.5
TRS6R2		1.05548		0.337978		1.39346		2399.94				43.1169		TRS6R2	1.0295		0.337		1.3665		2369.12				42.6262					TRS6R2	1.3775		2063.5				43.4043		TRS6R2		1.20948		0.512478		1.72196		2731.88
TRS6R3		1.07448		0.347978		1.42246		2795.12				43.9352		TRS6R3	1.067		0.3485		1.4155		2607.62				43.5973					TRS6R3	1.43		2253.19				44.1292		TRS6R3		1.26148		0.535978		1.79746		2862.94
TRS6R3		1.06298		0.358978		1.42196		2679.25				44.4948		TRS6R3	1.0605		0.3425		1.403		2429.25				43.623					TRS6R3	1.451		2066.69				44.7816		TRS6R3		1.26248		0.528978		1.79146		2849.25
TRS6R3		1.08748		0.341978		1.42946		2684.38				43.9544		TRS6R3	1.073		0.337		1.41		2559.38				43.3303					TRS6R3	1.4285		2273.12				44.2441		TRS6R3		1.28948		0.515478		1.80496		2789.5
T1R1		1.14048		0.414478		1.55496		3920.17				43.927		TR4R1	1.1095		0.3915		1.501		3670				43.4169					TR4R1	1.6005		3183.58				44.171		TR4R1		1.29948		0.547478		1.84696		4048.75
T1R1		1.13198		0.413978		1.54596		3858.5				43.4453		TR4R1	1.134		0.3885		1.5225		3691.83				43.3461					TR4R1	1.5445		3237.92				43.7015		TR4R1		1.29448		0.553478		1.84796		4182.33
T1R1		1.14048		0.411478		1.55196		3897.33				44.301		TR4R1	1.1255		0.386		1.5115		3730.58				43.6652					TR4R1	1.555		3195.42				44.5596		TR4R1		1.30898		0.568978		1.87796		4172.75
T1R2		1.14448		0.400978		1.54546		3917.08				44.465		TR4R2	1.099		0.3915		1.4905		3628.33				44.1651					TR4R2	1.544		3172.33				44.659		TR4R2		1.30948		0.544478		1.85396		4089.17
T1R2		1.12448		0.423978		1.54846		3874.83				43.7854		TR4R2	1.1215		0.384		1.5055		3683.5				43.5224					TR4R2	1.5595		3225.83				44.0764		TR4R2		1.29798		0.567478		1.86546		4187
T1R2		1.14548		0.410978		1.55646		3873				44.6112		TR4R2	1.14		0.39		1.53		3716.75				44.7797					TR4R2	1.545		3159.33				44.915		TR4R2		1.28448		0.566978		1.85146		4125.75
T2R1		1.08448		0.385478		1.46996		2542.83				41.993		TR6R1	1.093		0.3745		1.4675		2372.61				41.5183					TR6R1	1.469		2060.61				42.1325		TR6R1		1.29098		0.530478		1.82146		2627.72
T2R1		1.09448		0.376478		1.47096		2558.33				41.751		TR6R1	1.08		0.381		1.461		2392				41.3482					TR6R1	1.494		2104.28				41.9596		TR6R1		1.27898		0.541978		1.82096		2706.44
T2R1		1.08948		0.378978		1.46846		2588.17				41.6781		TR6R1	1.082		0.357		1.439		2421.94				41.0515					TR6R1	1.48		2063.72				42.0868		TR6R1		1.28198		0.545978		1.82796		2715.56
T2R2		1.02048		0.337978		1.35846		2398.06				42.4364		TR6R2	1.0265		0.318		1.3445		2227.83				41.755					TR6R2	1.353		1916.28				42.6676		TR6R2		1.26898		0.512978		1.78196		2624.72
T2R2		1.03748		0.322478		1.35996		2365				42.7957		TR6R2	1.012		0.3255		1.3375		2220.61				41.9595					TR6R2	1.3955		1900.72				43.0436		TR6R2		1.25198		0.521978		1.77396		2582.5
T2R2		1.03398		0.307478		1.34146		2295.72				42.4453		TR6R2	1.0085		0.314		1.3225		2184.61				42.17					TR6R2	1.364		1942.67				42.6961		TR6R2		1.26548		0.525478		1.79096		2599.94
T2R3		0.923478		0.255978		1.17946		2163.72				43.1193		TR6R3	0.9165		0.2415		1.158		1998.67				42.8421					TR6R3	1.2005		1685.56				43.4097		TR6R3		1.17048		0.485478		1.65596		2251.56
T2R3		0.931978		0.247978		1.17996		2080.56				43.5012		TR6R3	0.927		0.2385		1.1655		1950.17				43.2741					TR6R3	1.2075		1633.17				43.7852		TR6R3		1.15798		0.485478		1.64346		2231.5
T2R3		0.939478		0.239478		1.17896		2030.5				42.9784		TR6R3	0.898		0.247		1.145		1876.94				43.1286					TR6R3	1.1595		1741.44				43.2647		TR6R3		1.15398		0.482478		1.63646		2224.28
T3R1		1.04848		0.338478		1.38696		2103.78				39.943		TRL6R1	1.039		0.328		1.367		1953.39				39.5885					TRL6R1	1.3845		1733.39				40.0734		TRL6R1		1.25848		0.527478		1.78596		2626.22
T3R1		1.04098		0.339478		1.38046		2170.94				40.0412		TRL6R1	1.022		0.346		1.368		2005.5				39.6114					TRL6R1	1.3925		1717.67				40.2395		TRL6R1		1.25698		0.512478		1.76946		2564.06
T3R1		1.05248		0.332978		1.38546		2138.89				40.4303		TRL6R1	1.0315		0.3205		1.352		1972.39				39.7511					TRL6R1	1.3925		1706.22				40.8289		TRL6R1		1.23748		0.522478		1.75996		2579.44
T3R2		1.06398		0.337478		1.40146		2413.67				41.562		TRL6R2	1.0445		0.3325		1.377		2195.28				40.9496					TRL6R2	1.407		1913.72				41.7861		TRL6R2		1.22098		0.526978		1.74796		2494.83
T3R2		1.06048		0.345478		1.40596		2384.83				41.6569		TRL6R2	1.0695		0.3405		1.41		2217.78				41.2385					TRL6R2	1.431		1872.17				41.9039		TRL6R2		1.22798		0.507478		1.73546		2570.06
T3R2		1.06048		0.342978		1.40346		2316.83				42.1351		TRL6R2	1.046		0.342		1.388		2150				41.5569					TRL6R2	1.3925		1913.22				42.383		TRL6R2		1.23598		0.515478		1.75146		2570.94
T3R3		1.09798		0.387478		1.48546		2459.22				44.6946		TRL6R3	1.0765		0.3785		1.455		2296.39				44.247					TRL6R3	1.4705		2025.28				44.9908		TRL6R3		1.29198		0.531478		1.82346		2635.33
T3R3		1.10198		0.383478		1.48546		2523.5				45.2963		TRL6R3	1.0805		0.348		1.4285		2349.39				44.5735					TRL6R3	1.487		2041.44				45.5904		TRL6R3		1.27648		0.540978		1.81746		2706.83
T3R3		1.12148		0.367978		1.48946		2524.11				44.2281		TRL6R3	1.114		0.3685		1.4825		2349.44				44.1515					TRL6R3	1.4665		2002.28				44.5248		TRL6R3		1.27748		0.535978		1.81346		2730.28
T4R1		1.03898		0.335978		1.37496		2325.44				42.4487		TRS6R1	1.0225		0.3275		1.35		2202.56				42.1931					TRS6R1	1.3755		1958.06				42.683		TRS6R1		1.22998		0.507978		1.73796		2627.69
T4R1		1.04798		0.336978		1.38496		2460.38				42.9857		TRS6R1	1.052		0.3115		1.3635		2268				42.1065					TRS6R1	1.393		1890.56				43.2344		TRS6R1		1.21948		0.508978		1.72846		2625.12
T4R1		1.05648		0.324478		1.38096		2362.31				42.6511		TRS6R1	1.008		0.329		1.337		2174.81				41.5112					TRS6R1	1.386		1921.81				42.8983		TRS6R1		1.20448		0.522478		1.72696		2575.06
T4R2		1.03748		0.345478		1.38296		2432.94				43.3487		TRS6R2	1.0395		0.3385		1.378		2370.44				42.9098					TRS6R2	1.3845		1988.69				43.6359		TRS6R2		1.22148		0.504478		1.72596		2725.81
T4R2		1.04748		0.349478		1.39696		2406.19				43.5087		TRS6R2	1.038		0.3365		1.3745		2305.12				43.6989					TRS6R2	1.4015		2058.81				43.801		TRS6R2		1.20598		0.517478		1.72346		2759.5
T4R2		1.05548		0.337978		1.39346		2399.94				43.1169		TRS6R2	1.0295		0.337		1.3665		2369.12				42.6262					TRS6R2	1.3775		2063.5				43.4043		TRS6R2		1.20948		0.512478		1.72196		2731.88
T4R3		1.07448		0.347978		1.42246		2795.12				43.9352		TRS6R3	1.067		0.3485		1.4155		2607.62				43.5973					TRS6R3	1.43		2253.19				44.1292		TRS6R3		1.26148		0.535978		1.79746		2862.94
T4R3		1.06298		0.358978		1.42196		2679.25				44.4948		TRS6R3	1.0605		0.3425		1.403		2429.25				43.623					TRS6R3	1.451		2066.69				44.7816		TRS6R3		1.26248		0.528978		1.79146		2849.25
T4R3		1.08748		0.341978		1.42946		2684.38				43.9544		TRS6R3	1.073		0.337		1.41		2559.38				43.3303					TRS6R3	1.4285		2273.12				44.2441		TRS6R3		1.28948		0.515478		1.80496		2789.5
		Weight per panicle of superior grains(g)		Weight per panicle of inferior grains(g)		Weight per panicle(g)		Grain yield (kg hm-2)				Thousand grains weight (g)			Weight per panicle of superior grains(g)		Weight per panicle of inferior grains(g)		Weight per panicle(g)		Grain yield (kg hm-2)				Thousand grains weight (g)						Weight per panicle(g)		Grain yield (kg hm-2)				Thousand grains weight (g)				Weight per panicle of superior grains(g)		Weight per panicle of inferior grains(g)		Weight per panicle(g)		Grain yield (kg hm-2)
R1		1.13764	0.00490748	0.413311	0.00160728	1.55096	0.00458258	3892	31.1774			43.8911	0.428986	R1	1.123	0.0124399	0.388667	0.00275379	1.51167	0.010751	3697.47	30.6828			43.4761	0.167592				R1	1.56667	0.0297672	3205.64	28.5727			44.144	0.429671	R1		1.30098	0.00736546	0.556645	0.0110943	1.85762	0.0176163	4134.61	74.5121
R2		1.13814	0.0118462	0.411978	0.0115326	1.55012	0.00568624	3888.31	24.9391			44.2872	0.440709	R2	1.12017	0.0205325	0.3885	0.00396863	1.50867	0.0199395	3676.19	44.6588			44.1557	0.628667				R2	1.5495	0.00867468	3185.83	35.2456			44.5501	0.429803	R2		1.29731	0.0125133	0.559645	0.0131371	1.85696	0.00746659	4133.97	49.4322
AveTR4		1.13789		0.412645		1.55054		3890.15				44.0891		AveTR4	1.12158		0.388583		1.51017		3686.83				43.8159					AveTR4	1.55808		3195.74				44.3471		AveTR4		1.29914		0.558145		1.85729		4134.29
R1		1.08948	0.005	0.380311	0.00464579	1.46979	0.00125831	2563.11	23.0412			41.8074	0.16487	R1	1.085	0.007	0.370833	0.012413	1.45583	0.014936	2395.52	24.8542			41.306	0.236231				R1	1.481	0.01253	2076.2	24.3626			42.0596	0.089598	R1		1.28398	0.006245	0.539478	0.00804674	1.82346	0.00390512	2683.24	48.2958
R2		1.03064	0.00897682	0.322645	0.0152507	1.35329	0.0102754	2352.93	52.2242			42.5591	0.204927	R2	1.01567	0.00954376	0.319167	0.00583809	1.33483	0.0112398	2211.02	23.1528			41.9615	0.207511				R2	1.37083	0.0220586	1919.89	21.2041			42.8024	0.209345	R2		1.26214	0.00897682	0.520145	0.00644851	1.78229	0.0085049	2602.39	21.217
R3		0.931645	0.00800521	0.247811	0.00825126	1.17946	0.0005	2091.59	67.2934			43.1996	0.270476	R3	0.913833	0.0146828	0.242333	0.00431084	1.15617	0.0103722	1941.93	61.2781			43.0816	0.219781				R3	1.18917	0.0259294	1686.72	54.1483			43.4865	0.268649	R3		1.16081	0.00860717	0.484478	0.00173205	1.64529	0.00987843	2235.78	14.1331
AveTR6		1.01726		0.316922		1.33418		2335.88				42.522		AveTR6	1.00483		0.310778		1.31561		2182.82				42.1164					AveTR6	1.347		1894.27				42.7829		AveTR6		1.23564		0.5147		1.75034		2507.14
R1		1.04731	0.00583809	0.336978	0.0035	1.38429	0.00340343	2137.87	33.5949			40.1382	0.257722	R1	1.03083	0.00851959	0.3315	0.0131053	1.36233	0.00896289	1977.09	26.3721			39.6503	0.0880291				R1	1.38983	0.0046188	1719.09	13.6394			40.3806	0.396983	R1		1.25098	0.0117154	0.520811	0.00763763	1.77179	0.0131561	2589.91	32.3771
R2		1.06164	0.00202073	0.341978	0.00409268	1.40362	0.00225462	2371.78	49.7193			41.7847	0.307198	R2	1.05333	0.0140208	0.338333	0.00510718	1.39167	0.0168028	2187.69	34.5209			41.2483	0.303758				R2	1.41017	0.0194444	1899.7	23.8491			42.0243	0.316145	R2		1.22831	0.00750555	0.516645	0.00980221	1.74496	0.0084113	2545.28	43.6884
R3		1.10714	0.0125731	0.379645	0.0102997	1.48679	0.0023094	2502.28	37.2885			44.7397	0.535537	R3	1.09033	0.0205933	0.365	0.0155483	1.45533	0.0270015	2331.74	30.6156			44.324	0.221324				R3	1.47467	0.0108666	2023	19.6824			45.0353	0.534191	R3		1.28198	0.00867468	0.536145	0.00475219	1.81812	0.00503322	2690.81	49.4576
AveTRL6		1.07203		0.352867		1.4249		2337.31				42.2208		AveTRL6	1.05817		0.344944		1.40311		2165.51				41.7409					AveTRL6	1.42489		1880.6				42.4801		AveTRL6		1.25376		0.524534		1.77829		2608.67
R1		1.04781	0.00875119	0.332478	0.00694622	1.38029	0.00503322	2382.71	69.7426			42.6952	0.271153	R1	1.0275	0.0224221	0.322667	0.00969966	1.35017	0.0132508	2215.12	47.847			41.9369	0.37125				R1	1.38483	0.00880814	1923.48	33.7809			42.9386	0.277917	R1		1.21798	0.012816	0.513145	0.00809835	1.73112	0.00596518	2609.29	29.671
R2		1.04681	0.0090185	0.344311	0.00583809	1.39112	0.00728583	2413.02	17.5291			43.3248	0.196973	R2	1.03567	0.0053929	0.337333	0.00104083	1.373	0.00589491	2348.23	37.3351			43.0783	0.55589				R2	1.38783	0.0123423	2037	41.9054			43.6137	0.199276	R2		1.21231	0.00812917	0.511478	0.00655744	1.72379	0.00202073	2739.06	17.9571
R3		1.07498	0.0122577	0.349645	0.00862168	1.42462	0.00419325	2719.58	65.4712			44.1281	0.317658	R3	1.06683	0.00625167	0.342667	0.00575181	1.4095	0.00626498	2532.08	92.2661			43.5169	0.162096				R3	1.4365	0.0125797	2197.67	113.868			44.385	0.348247	R3		1.27114	0.015885	0.526811	0.0104203	1.79796	0.00676387	2833.9	39.0523
AveTRS6		1.05653		0.342145		1.39868		2505.1				43.3827		AveTRS6	1.04333		0.334222		1.37756		2365.15				42.844					AveTRS6	1.40306		2052.72				43.6458		AveTRS6		1.23381		0.517145		1.75096		2727.42
		Weight per panicle of superior grains(g)		Weight per panicle of inferior grains(g)		Weight per panicle(g)		Grain yield (kg hm-2)		Thousand grains weight (g)					Weight per panicle of superior grains(g)		Weight per panicle of inferior grains(g)		Weight per panicle(g)		Grain yield (kg hm-2)		Thousand grains weight (g)								Weight per panicle(g)		Grain yield (kg hm-2)		Thousand grains weight (g)						Weight per panicle of superior grains(g)		Weight per panicle of inferior grains(g)		Weight per panicle(g)		Grain yield (kg hm-2)		Thousand grains weight (g)
T1R1	T1R1	1.14	0.0049	0.41	0.0016	1.55	0.0046	3892	31.1774	43.89	0.429			T1R1	1.12	0.0124	0.39	0.0028	1.51	0.0108	3697.47	30.6828	43.48	0.1676							1.57	0.0298	3205.64	28.5727	44.14	0.4297				T1R1	1.3	0.0074	0.56	0.0111	1.86	0.0176	4134.61	74.5121	53.3
T2R2	T2R2	1.14	0.0118	0.41	0.0115	1.55	0.0057	3888.31	24.9391	44.29	0.4407			T2R2	1.12	0.0205	0.39	0.004	1.51	0.0199	3676.19	44.6588	44.16	0.6287							1.55	0.0087	3185.83	35.2456	44.55	0.4298				T2R2	1.3	0.0125	0.56	0.0131	1.86	0.0075	4133.97	49.4322	53.45
AverageT1	AverageT1	1.14		0.41		1.55		3890.15		44.09				AverageT1	1.12		0.39		1.51		3686.83		43.82								1.56		3195.74		44.35					AverageT1	1.3		0.56		1.86		4134.29		53.37
T2R1	T2R1	1.09	0.005	0.38	0.0046	1.47	0.0013	2563.11	23.0412	41.81	0.1649			T2R1	1.09	0.007	0.37	0.0124	1.46	0.0149	2395.52	24.8542	41.31	0.2362							1.48	0.0125	2076.2	24.3626	42.06	0.0896				T2R1	1.28	0.0062	0.54	0.008	1.82	0.0039	2683.24	48.2958	49.64
T2R2	T2R2	1.03	0.009	0.32	0.0153	1.35	0.0103	2352.93	52.2242	42.56	0.2049			T2R2	1.02	0.0095	0.32	0.0058	1.33	0.0112	2211.02	23.1528	41.96	0.2075							1.37	0.0221	1919.89	21.2041	42.8	0.2093				T2R2	1.26	0.009	0.52	0.0064	1.78	0.0085	2602.39	21.217	49.65
T2R3	T2R3	0.93	0.008	0.25	0.0083	1.18	0.0005	2091.59	67.2934	43.2	0.2705			T2R3	0.91	0.0147	0.24	0.0043	1.16	0.0104	1941.93	61.2781	43.08	0.2198							1.19	0.0259	1686.72	54.1483	43.49	0.2686				T2R3	1.16	0.0086	0.48	0.0017	1.65	0.0099	2235.78	14.1331	50.23
AverageT2	AverageT2	1.02		0.32		1.33		2335.88		42.52				AverageT2	1		0.31		1.32		2182.82		42.12								1.35		1894.27		42.78					AverageT2	1.24		0.51		1.75		2507.14		49.84
T3R1	T3R1	1.05	0.0058	0.34	0.0035	1.38	0.0034	2137.87	33.5949	40.14	0.2577			T3R1	1.03	0.0085	0.33	0.0131	1.36	0.009	1977.09	26.3721	39.65	0.088							1.39	0.0046	1719.09	13.6394	40.38	0.397				T3R1	1.25	0.0117	0.52	0.0076	1.77	0.0132	2589.91	32.3771	48.91
T3R2	T3R2	1.06	0.002	0.34	0.0041	1.4	0.0023	2371.78	49.7193	41.78	0.3072			T3R2	1.05	0.014	0.34	0.0051	1.39	0.0168	2187.69	34.5209	41.25	0.3038							1.41	0.0194	1899.7	23.8491	42.02	0.3161				T3R2	1.23	0.0075	0.52	0.0098	1.74	0.0084	2545.28	43.6884	50.47
T3R3	T3R3	1.11	0.0126	0.38	0.0103	1.49	0.0023	2502.28	37.2885	44.74	0.5355			T3R3	1.09	0.0206	0.37	0.0155	1.46	0.027	2331.74	30.6156	44.32	0.2213							1.47	0.0109	2023	19.6824	45.04	0.5342				T3R3	1.28	0.0087	0.54	0.0048	1.82	0.005	2690.81	49.4576	52.8
AverageT3	AverageT3	1.07		0.35		1.42		2337.31		42.22				AverageT3	1.06		0.34		1.4		2165.51		41.74								1.42		1880.6		42.48					AverageT3	1.25		0.52		1.78		2608.67		50.73
T4R1	T4R1	1.05	0.0088	0.33	0.0069	1.38	0.005	2382.71	69.7426	42.7	0.2712			T4R1	1.03	0.0224	0.32	0.0097	1.35	0.0133	2215.13	47.847	41.94	0.3713							1.38	0.0088	1923.48	33.7809	42.94	0.2779				T4R1	1.22	0.0128	0.51	0.0081	1.73	0.006	2609.29	29.671	48.97
T4R2	T4R2	1.05	0.009	0.34	0.0058	1.39	0.0073	2413.02	17.5291	43.32	0.197			T4R2	1.04	0.0054	0.34	0.001	1.37	0.0059	2348.23	37.3351	43.08	0.5559							1.39	0.0123	2037	41.9054	43.61	0.1993				T4R2	1.21	0.0081	0.51	0.0066	1.72	0.002	2739.06	17.9571	51.5
T4R3	T4R3	1.07	0.0123	0.35	0.0086	1.42	0.0042	2719.58	65.4712	44.13	0.3177			T4R3	1.07	0.0063	0.34	0.0058	1.41	0.0063	2532.08	92.2661	43.52	0.1621							1.44	0.0126	2197.67	113.868	44.38	0.3482				T4R3	1.27	0.0159	0.53	0.0104	1.8	0.0068	2833.9	39.0523	53.07
AverageT4	AverageT4	1.06		0.34		1.4		2505.1		43.38				AverageT4	1.04		0.33		1.38		2365.15		42.84								1.4		2052.72		43.65					AverageT4	1.23		0.52		1.75		2727.42		51.18
		Weight per panicle of superior grains(g)		Weight per panicle of inferior grains(g)		Weight per panicle(g)		Grain yield (kg hm-2)		Thousand grains weight (g)					Weight per panicle of superior grains(g)		Weight per panicle of inferior grains(g)		Weight per panicle(g)		Grain yield (kg hm-2)		Thousand grains weight (g)								Weight per panicle(g)		Grain yield (kg hm-2)		Thousand grains weight (g)						Weight per panicle of superior grains(g)		Weight per panicle of inferior grains(g)		Weight per panicle(g)		Grain yield (kg hm-2)		Thousand grains weight (g)
	T1R1	1.14±0.0049	a	0.41±0.0016	a	1.55±0.0046	a	3892±31.1774	a	43.89±0.429	a			T1R1	1.12±0.0124	a	0.39±0.0028	f	1.51±0.0108	a	3697.47±30.6828	a	43.48±0.1676	a							1.57±0.0298	a	3205.64±28.5727	a	44.14±0.4297	bc				T1R1	1.3±0.0074	a	0.56±0.0111	a	1.86±0.0176	a	4134.61±74.5121	a	53.3±0.3772
	T2R2	1.14±0.0118	a	0.41±0.0115	a	1.55±0.0057	a	3888.31±24.9391	a	44.29±0.4407	b			T2R2	1.12±0.0205	a	0.39±0.004	e	1.51±0.0199	a	3676.19±44.6588	a	44.16±0.6287	b							1.55±0.0087	a	3185.83±35.2456	a	44.55±0.4298	ab				T2R2	1.3±0.0125	ab	0.56±0.0131	ab	1.86±0.0075	a	4133.97±49.4322	a	53.45±0.4722
	AverageT1	1.14		0.41		1.55		3890.15		44.09				AverageT1	1.12		0.39		1.51		3686.83		43.82								1.56		3195.74		44.35					AverageT1	1.3		0.56		1.86		4134.29		53.37
	T2R1	1.09±0.005	c	0.38±0.0046	b	1.47±0.0013	c	2563.11±23.0412	c	41.81±0.1649	bc			T2R1	1.09±0.007	b	0.37±0.0124	de	1.46±0.0149	b	2395.52±24.8542	c	41.31±0.2362	cd							1.48±0.0125	b	2076.2±24.3626	c	42.06±0.0896	g				T2R1	1.28±0.0062	abc	0.54±0.008	abc	1.82±0.0039	b	2683.24±48.2958	de	49.64±1.0866
	T2R2	1.03±0.009	f	0.32±0.0153	e	1.35±0.0103	h	2352.93±52.2242	e	42.56±0.2049	ef			T2R2	1.02±0.0095	e	0.32±0.0058	cde	1.33±0.0112	f	2211.02±23.1528	d	41.96±0.2075	e							1.37±0.0221	e	1919.89±21.2041	d	42.8±0.2093	f				T2R2	1.26±0.009	de	0.52±0.0064	de	1.78±0.0085	d	2602.39±21.217	f	49.65±0.6897
	T2R3	0.93±0.008	g	0.25±0.0083	f	1.18±0.0005	i	2091.59±67.2934	f	43.2±0.2705	de			T2R3	0.91±0.0147	f	0.24±0.0043	cd	1.16±0.0104	g	1941.93±61.2781	e	43.08±0.2198	de							1.19±0.0259	f	1686.72±54.1483	e	43.49±0.2686	de				T2R3	1.16±0.0086	g	0.48±0.0017	g	1.65±0.0099	g	2235.78±14.1331	g	50.23±0.2186
	AverageT2	1.02		0.32		1.33		2335.88		42.52				AverageT2	1		0.31		1.32		2182.82		42.12								1.35		1894.27		42.78					AverageT2	1.24		0.51		1.75		2507.14		49.84
	T3R1	1.05±0.0058	e	0.34±0.0035	cde	1.38±0.0034	fg	2137.87±33.5949	f	40.14±0.2577	f			T3R1	1.03±0.0085	de	0.33±0.0131	c	1.36±0.009	e	1977.09±26.3721	e	39.65±0.088	f							1.39±0.0046	de	1719.09±13.6394	e	40.38±0.397	h				T3R1	1.25±0.0117	e	0.52±0.0076	e	1.77±0.0132	d	2589.91±32.3771	f	48.91±0.4266
	T3R2	1.06±0.002	de	0.34±0.0041	cd	1.4±0.0023	e	2371.78±49.7193	e	41.78±0.3072	cd			T3R2	1.05±0.014	cd	0.34±0.0051	c	1.39±0.0168	cd	2187.69±34.5209	d	41.25±0.3038	e							1.41±0.0194	cd	1899.7±23.8491	d	42.02±0.3161	g				T3R2	1.23±0.0075	f	0.52±0.0098	f	1.74±0.0084	e	2545.28±43.6884	f	50.47±0.3242
	T3R3	1.11±0.0126	b	0.38±0.0103	b	1.49±0.0023	b	2502.28±37.2885	cd	44.74±0.5355	b			T3R3	1.09±0.0206	b	0.37±0.0155	b	1.46±0.027	b	2331.74±30.6156	c	44.32±0.2213	b							1.47±0.0109	b	2023±19.6824	c	45.04±0.5342	a				T3R3	1.28±0.0087	bc	0.54±0.0048	bc	1.82±0.005	b	2690.81±49.4576	d	52.8±0.1228
	AverageT3	1.07		0.35		1.42		2337.31		42.22				AverageT3	1.06		0.34		1.4		2165.51		41.74								1.42		1880.6		42.48					AverageT3	1.25		0.52		1.78		2608.67		50.73
	T4R1	1.05±0.0088	e	0.33±0.0069	de	1.38±0.005	g	2382.71±69.7426	e	42.7±0.2712	b			T4R1	1.03±0.0224	de	0.32±0.0097	b	1.35±0.0133	ef	2215.13±47.847	d	41.94±0.3713	cd							1.38±0.0088	de	1923.48±33.7809	d	42.94±0.2779	ef				T4R1	1.22±0.0128	f	0.51±0.0081	f	1.73±0.006	ef	2609.29±29.671	ef	48.97±0.3502
	T4R2	1.05±0.009	e	0.34±0.0058	cd	1.39±0.0073	f	2413.02±17.5291	de	43.32±0.197	cd			T4R2	1.04±0.0054	de	0.34±0.001	a	1.37±0.0059	de	2348.23±37.3351	c	43.08±0.5559	de							1.39±0.0123	de	2037±41.9054	c	43.61±0.1993	c				T4R2	1.21±0.0081	f	0.51±0.0066	f	1.72±0.002	f	2739.06±17.9571	c	51.5±0.3963
	T4R3	1.07±0.0123	cd	0.35±0.0086	c	1.42±0.0042	d	2719.58±65.4712	b	44.13±0.3177	b			T4R3	1.07±0.0063	bc	0.34±0.0058	a	1.41±0.0063	c	2532.08±92.2661	b	43.52±0.1621	c							1.44±0.0126	c	2197.67±113.8685	b	44.38±0.3482	b				T4R3	1.27±0.0159	cd	0.53±0.0104	cd	1.8±0.0068	c	2833.9±39.0523	d	53.07±0.2353
	AverageT4	1.06		0.34		1.4		2505.1		43.38				AverageT4	1.04		0.33		1.38		2365.15		42.84								1.4		2052.72		43.65					AverageT4	1.23		0.52		1.75		2727.42		51.18
T1			a		a		a		a		a					a		f		a		a		a								a		a		bc						a		a		a		a
T1			a		a		a		a		b					a		e		a		a		b								a		a		ab						ab		ab		a		a
T1			c		b		c		c		bc					b		de		b		c		cd								b		c		g						abc		abc		b		de
T1			f		e		h		e		ef					e		cde		f		d		e								e		d		f						de		de		d		f
T1			g		f		i		f		de					f		cd		g		e		de								f		e		de						g		g		g		g
T1			e		cde		fg		f		f					de		c		e		e		f								de		e		h						e		e		d		f
T2			de		cd		e		e		cd					cd		c		cd		d		e								cd		d		g						f		f		e		f
T2			b		b		b		cd		b					b		b		b		c		b								b		c		a						bc		bc		b		d
T2			e		de		g		e		b					de		b		ef		d		cd								de		d		ef						f		f		ef		ef
T2			e		cd		f		de		cd					de		a		de		c		de								de		c		c						f		f		f		c
T2			cd		c		d		b		b					bc		a		c		b		c								c		b		b						cd		cd		c		d
T2
		Weight per panicle of superior grains(g)		Weight per panicle of inferior grains(g)		Weight per panicle(g)		Grain yield (kg hm-2)		Thousand grains weight (g)					Weight per panicle of superior grains(g)		Weight per panicle of inferior grains(g)		Weight per panicle(g)		Grain yield (kg hm-2)		Thousand grains weight (g)								Weight per panicle(g)		Grain yield (kg hm-2)		Thousand grains weight (g)						Weight per panicle of superior grains(g)		Weight per panicle of inferior grains(g)		Weight per panicle(g)		Grain yield (kg hm-2)		Thousand grains weight (g)
T2	T1R1	1.14±0.0049a		0.41±0.0016a		1.55±0.0046a		3892±31.1774a		43.89±0.429a					1.12±0.0124a		0.39±0.0028f		1.51±0.0108a		3697.47±30.6828a		43.48±0.1676a								1.57±0.0298a		3205.64±28.5727a		44.14±0.4297bc						1.3±0.0074a		0.56±0.0111a		1.86±0.0176a		4134.61±74.5121a		53.3±0.3772cde
T2	T2R2	1.14±0.0118a		0.41±0.0115a		1.55±0.0057a		3888.31±24.9391a		44.29±0.4407b					1.12±0.0205a		0.39±0.004e		1.51±0.0199a		3676.19±44.6588a		44.16±0.6287b								1.55±0.0087a		3185.83±35.2456a		44.55±0.4298ab						1.3±0.0125ab		0.56±0.0131ab		1.86±0.0075a		4133.97±49.4322a		53.45±0.4722ab
T3	AverageT1	1.14		0.41		1.55		3890.15		44.09					1.12		0.39		1.51		3686.83		43.82								1.56		3195.74		44.35						1.3		0.56		1.86		4134.29		53.37
T3	T2R1	1.09±0.005c		0.38±0.0046b		1.47±0.0013c		2563.11±23.0412c		41.81±0.1649bc					1.09±0.007b		0.37±0.0124de		1.46±0.0149b		2395.52±24.8542c		41.31±0.2362cd								1.48±0.0125b		2076.2±24.3626c		42.06±0.0896g						1.28±0.0062abc		0.54±0.008abc		1.82±0.0039b		2683.24±48.2958de		49.64±1.0866bcd
T3	T2R2	1.03±0.009f		0.32±0.0153e		1.35±0.0103h		2352.93±52.2242e		42.56±0.2049ef					1.02±0.0095e		0.32±0.0058cde		1.33±0.0112f		2211.02±23.1528d		41.96±0.2075e								1.37±0.0221e		1919.89±21.2041d		42.8±0.2093f						1.26±0.009de		0.52±0.0064de		1.78±0.0085d		2602.39±21.217f		49.65±0.6897de
T3	T2R3	0.93±0.008g		0.25±0.0083f		1.18±0.0005i		2091.59±67.2934f		43.2±0.2705de					0.91±0.0147f		0.24±0.0043cd		1.16±0.0104g		1941.93±61.2781e		43.08±0.2198de								1.19±0.0259f		1686.72±54.1483e		43.49±0.2686de						1.16±0.0086g		0.48±0.0017g		1.65±0.0099g		2235.78±14.1331g		50.23±0.2186e
T3	AverageT2	1.02		0.32		1.33		2335.88		42.52					1		0.31		1.32		2182.82		42.12								1.35		1894.27		42.78						1.24		0.51		1.75		2507.14		49.84
T3	T3R1	1.05±0.0058e		0.34±0.0035cde		1.38±0.0034fg		2137.87±33.5949f		40.14±0.2577f					1.03±0.0085de		0.33±0.0131c		1.36±0.009e		1977.09±26.3721e		39.65±0.088f								1.39±0.0046de		1719.09±13.6394e		40.38±0.397h						1.25±0.0117e		0.52±0.0076e		1.77±0.0132d		2589.91±32.3771f		48.91±0.4266de
T3	T3R2	1.06±0.002de		0.34±0.0041cd		1.4±0.0023e		2371.78±49.7193e		41.78±0.3072cd					1.05±0.014cd		0.34±0.0051c		1.39±0.0168cd		2187.69±34.5209d		41.25±0.3038e								1.41±0.0194cd		1899.7±23.8491d		42.02±0.3161g						1.23±0.0075f		0.52±0.0098f		1.74±0.0084e		2545.28±43.6884f		50.47±0.3242bcd
T3	T3R3	1.11±0.0126b		0.38±0.0103b		1.49±0.0023b		2502.28±37.2885cd		44.74±0.5355b					1.09±0.0206b		0.37±0.0155b		1.46±0.027b		2331.74±30.6156c		44.32±0.2213b								1.47±0.0109b		2023±19.6824c		45.04±0.5342a						1.28±0.0087bc		0.54±0.0048bc		1.82±0.005b		2690.81±49.4576d		52.8±0.1228bc
T3	AverageT3	1.07		0.35		1.42		2337.31		42.22					1.06		0.34		1.4		2165.51		41.74								1.42		1880.6		42.48						1.25		0.52		1.78		2608.67		50.73
T4	T4R1	1.05±0.0088e		0.33±0.0069de		1.38±0.005g		2382.71±69.7426e		42.7±0.2712b					1.03±0.0224de		0.32±0.0097b		1.35±0.0133ef		2215.13±47.847d		41.94±0.3713cd								1.38±0.0088de		1923.48±33.7809d		42.94±0.2779ef						1.22±0.0128f		0.51±0.0081f		1.73±0.006ef		2609.29±29.671ef		48.97±0.3502de
T4	T4R2	1.05±0.009e		0.34±0.0058cd		1.39±0.0073f		2413.02±17.5291de		43.32±0.197cd					1.04±0.0054de		0.34±0.001a		1.37±0.0059de		2348.23±37.3351c		43.08±0.5559de								1.39±0.0123de		2037±41.9054c		43.61±0.1993c						1.21±0.0081f		0.51±0.0066f		1.72±0.002f		2739.06±17.9571c		51.5±0.3963bcd
T4	T4R3	1.07±0.0123cd		0.35±0.0086c		1.42±0.0042d		2719.58±65.4712b		44.13±0.3177b					1.07±0.0063bc		0.34±0.0058a		1.41±0.0063c		2532.08±92.2661b		43.52±0.1621c								1.44±0.0126c		2197.67±113.8685b		44.38±0.3482b						1.27±0.0159cd		0.53±0.0104cd		1.8±0.0068c		2833.9±39.0523d		53.07±0.2353a
T4	AverageT4	1.06		0.34		1.4		2505.1		43.38					1.04		0.33		1.38		2365.15		42.84								1.4		2052.72		43.65						1.23		0.52		1.75		2727.42		51.18
T4
T4
T4	AT1R1
T4	AT1R1
T4	AT1R1
	AT1R2
	AT1R2
	AT1R2
	AT2R1
	AT2R1
	AT2R1
	AT2R2
	AT2R2
	AT2R2
	AT2R3
	AT2R3
	AT2R3
	AT3R1
	AT3R1
	AT3R1
	AT3R2
	AT3R2
	AT3R2
	AT3R3
	AT3R3
	AT3R3
	AT4R1
	AT4R1
	AT4R1
	AT4R2
	AT4R2
	AT4R2
	AT4R3
	AT4R3
	AT4R3
	BT1R1
	BT1R1
	BT1R1
	BT1R2
	BT1R2
	BT1R2
	BT2R1
	BT2R1
	BT2R1
	BT2R2
	BT2R2
	BT2R2
	BT2R3
	BT2R3
	BT2R3
	BT3R1
	BT3R1
	BT3R1
	BT3R2
	BT3R2
	BT3R2
	BT3R3
	BT3R3
	BT3R3
	BT4R1
	BT4R1
	BT4R1
	BT4R2
	BT4R2
	BT4R2
	BT4R3
	BT4R3
	BT4R3
	AT1R1		1.14048		0.414478		1.55496		3920.17				43.927		TR4R1	1.1095		0.3915		1.501		3670				43.4169					TR4R1	1.6005		3183.58				44.171
	AT1R1		1.13198		0.413978		1.54596		3858.5				43.4453		TR4R1	1.134		0.3885		1.5225		3691.83				43.3461					TR4R1	1.5445		3237.92				43.7015
	AT1R1		1.14048		0.411478		1.55196		3897.33				44.301		TR4R1	1.1255		0.386		1.5115		3730.58				43.6652					TR4R1	1.555		3195.42				44.5596
	AT1R2		1.14448		0.400978		1.54546		3917.08				44.465		TR4R2	1.099		0.3915		1.4905		3628.33				44.1651					TR4R2	1.544		3172.33				44.659
	AT1R2		1.12448		0.423978		1.54846		3874.83				43.7854		TR4R2	1.1215		0.384		1.5055		3683.5				43.5224					TR4R2	1.5595		3225.83				44.0764
	AT1R2		1.14548		0.410978		1.55646		3873				44.6112		TR4R2	1.14		0.39		1.53		3716.75				44.7797					TR4R2	1.545		3159.33				44.915
	AT2R1		1.08448		0.385478		1.46996		2542.83				41.993		TR6R1	1.093		0.3745		1.4675		2372.61				41.5183					TR6R1	1.469		2060.61				42.1325
	AT2R1		1.09448		0.376478		1.47096		2558.33				41.751		TR6R1	1.08		0.381		1.461		2392				41.3482					TR6R1	1.494		2104.28				41.9596
	AT2R1		1.08948		0.378978		1.46846		2588.17				41.6781		TR6R1	1.082		0.357		1.439		2421.94				41.0515					TR6R1	1.48		2063.72				42.0868
	AT2R2		1.02048		0.337978		1.35846		2398.06				42.4364		TR6R2	1.0265		0.318		1.3445		2227.83				41.755					TR6R2	1.353		1916.28				42.6676
	AT2R2		1.03748		0.322478		1.35996		2365				42.7957		TR6R2	1.012		0.3255		1.3375		2220.61				41.9595					TR6R2	1.3955		1900.72				43.0436
	AT2R2		1.03398		0.307478		1.34146		2295.72				42.4453		TR6R2	1.0085		0.314		1.3225		2184.61				42.17					TR6R2	1.364		1942.67				42.6961
	AT2R3		0.923478		0.255978		1.17946		2163.72				43.1193		TR6R3	0.9165		0.2415		1.158		1998.67				42.8421					TR6R3	1.2005		1685.56				43.4097
	AT2R3		0.931978		0.247978		1.17996		2080.56				43.5012		TR6R3	0.927		0.2385		1.1655		1950.17				43.2741					TR6R3	1.2075		1633.17				43.7852
	AT2R3		0.939478		0.239478		1.17896		2030.5				42.9784		TR6R3	0.898		0.247		1.145		1876.94				43.1286					TR6R3	1.1595		1741.44				43.2647
	AT3R1		1.04848		0.338478		1.38696		2103.78				39.943		TRL6R1	1.039		0.328		1.367		1953.39				39.5885					TRL6R1	1.3845		1733.39				40.0734
	AT3R1		1.04098		0.339478		1.38046		2170.94				40.0412		TRL6R1	1.022		0.346		1.368		2005.5				39.6114					TRL6R1	1.3925		1717.67				40.2395
	AT3R1		1.05248		0.332978		1.38546		2138.89				40.4303		TRL6R1	1.0315		0.3205		1.352		1972.39				39.7511					TRL6R1	1.3925		1706.22				40.8289
	AT3R2		1.06398		0.337478		1.40146		2413.67				41.562		TRL6R2	1.0445		0.3325		1.377		2195.28				40.9496					TRL6R2	1.407		1913.72				41.7861
	AT3R2		1.06048		0.345478		1.40596		2384.83				41.6569		TRL6R2	1.0695		0.3405		1.41		2217.78				41.2385					TRL6R2	1.431		1872.17				41.9039
	AT3R2		1.06048		0.342978		1.40346		2316.83				42.1351		TRL6R2	1.046		0.342		1.388		2150				41.5569					TRL6R2	1.3925		1913.22				42.383
	AT3R3		1.09798		0.387478		1.48546		2459.22				44.6946		TRL6R3	1.0765		0.3785		1.455		2296.39				44.247					TRL6R3	1.4705		2025.28				44.9908
	AT3R3		1.10198		0.383478		1.48546		2523.5				45.2963		TRL6R3	1.0805		0.348		1.4285		2349.39				44.5735					TRL6R3	1.487		2041.44				45.5904
	AT3R3		1.12148		0.367978		1.48946		2524.11				44.2281		TRL6R3	1.114		0.3685		1.4825		2349.44				44.1515					TRL6R3	1.4665		2002.28				44.5248
	AT4R1		1.03898		0.335978		1.37496		2325.44				42.4487		TRS6R1	1.0225		0.3275		1.35		2202.56				42.1931					TRS6R1	1.3755		1958.06				42.683
	AT4R1		1.04798		0.336978		1.38496		2460.38				42.9857		TRS6R1	1.052		0.3115		1.3635		2268				42.1065					TRS6R1	1.393		1890.56				43.2344
	AT4R1		1.05648		0.324478		1.38096		2362.31				42.6511		TRS6R1	1.008		0.329		1.337		2174.81				41.5112					TRS6R1	1.386		1921.81				42.8983
	AT4R2		1.03748		0.345478		1.38296		2432.94				43.3487		TRS6R2	1.0395		0.3385		1.378		2370.44				42.9098					TRS6R2	1.3845		1988.69				43.6359
	AT4R2		1.04748		0.349478		1.39696		2406.19				43.5087		TRS6R2	1.038		0.3365		1.3745		2305.12				43.6989					TRS6R2	1.4015		2058.81				43.801
	AT4R2		1.05548		0.337978		1.39346		2399.94				43.1169		TRS6R2	1.0295		0.337		1.3665		2369.12				42.6262					TRS6R2	1.3775		2063.5				43.4043
	AT4R3		1.07448		0.347978		1.42246		2795.12				43.9352		TRS6R3	1.067		0.3485		1.4155		2607.62				43.5973					TRS6R3	1.43		2253.19				44.1292
	AT4R3		1.06298		0.358978		1.42196		2679.25				44.4948		TRS6R3	1.0605		0.3425		1.403		2429.25				43.623					TRS6R3	1.451		2066.69				44.7816
	AT4R3		1.08748		0.341978		1.42946		2684.38				43.9544		TRS6R3	1.073		0.337		1.41		2559.38				43.3303					TRS6R3	1.4285		2273.12				44.2441
	BT1R1		1.29948		0.547478		1.84696		4048.75				53.1553		TR4R1	1.2715		0.518		1.7895		3848.5				52.4869					TR4R1	1.836		3423.17				53.2423
	BT1R1		1.29448		0.553478		1.84796		4182.33				53.7271		TR4R1	1.256		0.524		1.78		3988.17				52.9451					TR4R1	1.877		3447.17				53.0261
	BT1R1		1.30898		0.568978		1.87796		4172.75				53.0151		TR4R1	1.2705		0.5355		1.806		3988.5				52.7609					TR4R1	1.8265		3335.58				53.7598
	BT1R2		1.30948		0.544478		1.85396		4089.17				52.9174		TR4R2	1.2705		0.5175		1.788		3885.08				53.1914					TR4R2	1.8185		3310.75				52.5009
	BT1R2		1.29798		0.567478		1.86546		4187				53.5899		TR4R2	1.2645		0.532		1.7965		3997.83				52.7249					TR4R2	1.829		3432.58				53.1975
	BT1R2		1.28448		0.566978		1.85146		4125.75				53.8279		TR4R2	1.244		0.542		1.786		3942.33				52.8855					TR4R2	1.8025		3467.08				54.4704
	BT2R1		1.29098		0.530478		1.82146		2627.72				48.8069		TR6R1	1.253		0.5035		1.7565		2570.5				48.6205					TR6R1	1.8355		2182.94				49.7931
	BT2R1		1.27898		0.541978		1.82096		2706.44				50.8676		TR6R1	1.241		0.5085		1.7495		2539.67				50.5971					TR6R1	1.7785		2204.56				51.8632
	BT2R1		1.28198		0.545978		1.82796		2715.56				49.2398		TR6R1	1.254		0.517		1.771		2548.89				49.113					TR6R1	1.8		2228.06				50.2361
	BT2R2		1.26898		0.512978		1.78196		2624.72				49.4187		TR6R2	1.2315		0.48		1.7115		2491.28				49.1245					TR6R2	1.759		2167.67				51.3621
	BT2R2		1.25198		0.521978		1.77396		2582.5				50.4249		TR6R2	1.2145		0.489		1.7035		2524.06				49.9941					TR6R2	1.7465		2181.28				52.3732
	BT2R2		1.26548		0.525478		1.79096		2599.94				49.1046		TR6R2	1.2355		0.4965		1.732		2521.94				48.1016					TR6R2	1.804		2160.5				51.0374
	BT2R3		1.17048		0.485478		1.65596		2251.56				50.0456		TR6R3	1.139		0.454		1.593		2140.61				49.4033					TR6R3	1.631		1847.56				50.0735
	BT2R3		1.15798		0.485478		1.64346		2231.5				50.1782		TR6R3	1.122		0.454		1.576		2147.67				49.8692					TR6R3	1.66		1840.83				50.3129
	BT2R3		1.15398		0.482478		1.63646		2224.28				50.4727		TR6R3	1.1155		0.445		1.5605		2124.61				50.1553					TR6R3	1.674		1859.39				50.6106
	BT3R1		1.25848		0.527478		1.78596		2626.22				48.7637		TRL6R1	1.221		0.4945		1.7155		2459.67				48.3837					TRL6R1	1.688		2058.94				49.7374
	BT3R1		1.25698		0.512478		1.76946		2564.06				48.5694		TRL6R1	1.2195		0.4835		1.703		2397.06				48.0727					TRL6R1	1.713		2087.28				49.5617
	BT3R1		1.23748		0.522478		1.75996		2579.44				49.386		TRL6R1	1.2055		0.489		1.6945		2411.44				49.0296					TRL6R1	1.6815		2132.28				50.3842
	BT3R2		1.22098		0.526978		1.74796		2494.83				50.1385		TRL6R2	1.196		0.4955		1.6915		2332				50.2167					TRL6R2	1.69		2066.17				52.0845
	BT3R2		1.22798		0.507478		1.73546		2570.06				50.4953		TRL6R2	1.181		0.4745		1.6555		2404.11				50.2952					TRL6R2	1.724		2081.94				52.4437
	BT3R2		1.23598		0.515478		1.75146		2570.94				50.7858		TRL6R2	1.2035		0.4885		1.692		2404.28				50.2796					TRL6R2	1.706		2024.33				52.7369
	BT3R3		1.29198		0.531478		1.82346		2635.33				52.9452		TRL6R3	1.259		0.4945		1.7535		2490.89				52.5089					TRL6R3	1.7555		2182				52.9976
	BT3R3		1.27648		0.540978		1.81746		2706.83				52.7427		TRL6R3	1.246		0.5015		1.7475		2540.17				52.7216					TRL6R3	1.735		2217.67				52.8954
	BT3R3		1.27748		0.535978		1.81346		2730.28				52.7235		TRL6R3	1.237		0.5115		1.7485		2563.61				52.4388					TRL6R3	1.7405		2159.06				52.8763
	BT4R1		1.22998		0.507978		1.73796		2627.69				48.9		TRS6R1	1.1925		0.473		1.6655		2502.69				49.4478					TRS6R1	1.693		2130.69				49.1782
	BT4R1		1.21948		0.508978		1.72846		2625.12				48.6675		TRS6R1	1.1845		0.484		1.6685		2479.31				49.0942					TRS6R1	1.702		2141.25				48.9605
	BT4R1		1.20448		0.522478		1.72696		2575.06				49.3559		TRS6R1	1.172		0.4955		1.6675		2475.06				50.7627					TRS6R1	1.697		2169.56				51.3765
	BT4R2		1.22148		0.504478		1.72596		2725.81				51.8227		TRS6R2	1.1915		0.4755		1.667		2538.31				51.8774					TRS6R2	1.6685		2208.31				52.5752
	BT4R2		1.20598		0.517478		1.72346		2759.5				51.059		TRS6R2	1.1685		0.4885		1.657		2572				51.1918					TRS6R2	1.684		2199.62				52.477
	BT4R2		1.20948		0.512478		1.72196		2731.88				51.6242		TRS6R2	1.172		0.482		1.654		2544.38				51.5793					TRS6R2	1.669		2199.19				51.9606
	BT4R3		1.26148		0.535978		1.79746		2862.94				52.8		TRS6R3	1.2235		0.5075		1.731		2675.44				52.7573					TRS6R3	1.7185		2285.94				53.0533
	BT4R3		1.26248		0.528978		1.79146		2849.25				53.163		TRS6R3	1.2245		0.498		1.7225		2661.75				52.4576					TRS6R3	1.739		2250.75				53.5197
	BT4R3		1.28948		0.515478		1.80496		2789.5				53.241		TRS6R3	1.2565		0.4825		1.739		2602				52.5401					TRS6R3	1.7055		2319.25				53.5931
		T1R1	1.13764	0.00490748	0.413311	0.00160728	1.55096	0.00458258	3892	31.1774			43.8911	0.428986		1.123	0.0124399	0.388667	0.00275379	1.51167	0.010751	3697.47	30.6828			43.4761	0.167592					1.56667	0.0297672	3205.64	28.5727			44.144	0.429671
		T2R2	1.13814	0.0118462	0.411978	0.0115326	1.55012	0.00568624	3888.31	24.9391			44.2872	0.440709		1.12017	0.0205325	0.3885	0.00396863	1.50867	0.0199395	3676.19	44.6588			44.1557	0.628667					1.5495	0.00867468	3185.83	35.2456			44.5501	0.429803
		AverageT1	1.13789		0.412645		1.55054		3890.15				44.0891			1.12158		0.388583		1.51017		3686.83				43.8159						1.55808		3195.74				44.3471
		T2R1	1.08948	0.005	0.380311	0.00464579	1.46979	0.00125831	2563.11	23.0412			41.8074	0.16487		1.085	0.007	0.370833	0.012413	1.45583	0.014936	2395.52	24.8542			41.306	0.236231					1.481	0.01253	2076.2	24.3626			42.0596	0.089598
		T2R2	1.03064	0.00897682	0.322645	0.0152507	1.35329	0.0102754	2352.93	52.2242			42.5591	0.204927		1.01567	0.00954376	0.319167	0.00583809	1.33483	0.0112398	2211.02	23.1528			41.9615	0.207511					1.37083	0.0220586	1919.89	21.2041			42.8024	0.209345
		T2R3	0.931645	0.00800521	0.247811	0.00825126	1.17946	0.0005	2091.59	67.2934			43.1996	0.270476		0.913833	0.0146828	0.242333	0.00431084	1.15617	0.0103722	1941.93	61.2781			43.0816	0.219781					1.18917	0.0259294	1686.72	54.1483			43.4865	0.268649
		AverageT2	1.01726		0.316922		1.33418		2335.88				42.522			1.00483		0.310778		1.31561		2182.82				42.1164						1.347		1894.27				42.7829
		T3R1	1.04731	0.00583809	0.336978	0.0035	1.38429	0.00340343	2137.87	33.5949			40.1382	0.257722		1.03083	0.00851959	0.3315	0.0131053	1.36233	0.00896289	1977.09	26.3721			39.6503	0.0880291					1.38983	0.0046188	1719.09	13.6394			40.3806	0.396983
		T3R2	1.06164	0.00202073	0.341978	0.00409268	1.40362	0.00225462	2371.78	49.7193			41.7847	0.307198		1.05333	0.0140208	0.338333	0.00510718	1.39167	0.0168028	2187.69	34.5209			41.2483	0.303758					1.41017	0.0194444	1899.7	23.8491			42.0243	0.316145
		T3R3	1.10714	0.0125731	0.379645	0.0102997	1.48679	0.0023094	2502.28	37.2885			44.7397	0.535537		1.09033	0.0205933	0.365	0.0155483	1.45533	0.0270015	2331.74	30.6156			44.324	0.221324					1.47467	0.0108666	2023	19.6824			45.0353	0.534191
		AverageT3	1.07203		0.352867		1.4249		2337.31				42.2208			1.05817		0.344944		1.40311		2165.51				41.7409						1.42489		1880.6				42.4801
		T4R1	1.04781	0.00875119	0.332478	0.00694622	1.38029	0.00503322	2382.71	69.7426			42.6952	0.271153		1.0275	0.0224221	0.322667	0.00969966	1.35017	0.0132508	2215.12	47.847			41.9369	0.37125					1.38483	0.00880814	1923.48	33.7809			42.9386	0.277917
		T4R2	1.04681	0.0090185	0.344311	0.00583809	1.39112	0.00728583	2413.02	17.5291			43.3248	0.196973		1.03567	0.0053929	0.337333	0.00104083	1.373	0.00589491	2348.23	37.3351			43.0783	0.55589					1.38783	0.0123423	2037	41.9054			43.6137	0.199276
		T4R3	1.07498	0.0122577	0.349645	0.00862168	1.42462	0.00419325	2719.58	65.4712			44.1281	0.317658		1.06683	0.00625167	0.342667	0.00575181	1.4095	0.00626498	2532.08	92.2661			43.5169	0.162096					1.4365	0.0125797	2197.67	113.868			44.385	0.348247
		AverageT4	1.05653		0.342145		1.39868		2505.1				43.3827			1.04333		0.334222		1.37756		2365.15				42.844						1.40306		2052.72				43.6458
		T1R1	1.30098	0.00736546	0.556645	0.0110943	1.85762	0.0176163	4134.61	74.5121			53.2992	0.377183		1.266	0.00867468	0.525833	0.00889288	1.79183	0.0131561	3941.72	80.733			52.731	0.230553					1.8465	0.0268375	3401.97	58.7334			53.3427	0.377
		T2R2	1.29731	0.0125133	0.559645	0.0131371	1.85696	0.00746659	4133.97	49.4322			53.4451	0.472224		1.25967	0.0138954	0.5305	0.0123187	1.79017	0.00557524	3941.75	56.3773			52.9339	0.237003					1.81667	0.0133448	3403.47	82.1317			53.3896	0.998674
		AverageT1	1.29914		0.558145		1.85729		4134.29				53.3721			1.26283		0.528167		1.791		3941.74				52.8325						1.83158		3402.72				53.3662
		T2R1	1.28398	0.006245	0.539478	0.00804674	1.82346	0.00390512	2683.24	48.2958			49.6381	1.08657		1.24933	0.00723418	0.509667	0.0068252	1.759	0.0109659	2553.02	15.8261			49.4435	1.02894					1.80467	0.0287851	2205.19	22.5621			50.6308	1.09004
		T2R2	1.26214	0.00897682	0.520145	0.00644851	1.78229	0.0085049	2602.39	21.217			49.6494	0.689707		1.22717	0.0111505	0.4885	0.00826136	1.71567	0.0146998	2512.43	18.3452			49.0734	0.94727					1.76983	0.0302421	2169.81	10.5541			51.5909	0.696695
		T2R3	1.16081	0.00860717	0.484478	0.00173205	1.64529	0.00987843	2235.78	14.1331			50.2322	0.218583		1.1255	0.0121347	0.451	0.00519615	1.5765	0.0162558	2137.63	11.8134			49.8093	0.379542					1.655	0.0219317	1849.26	9.39437			50.3324	0.26906
		AverageT2	1.23564		0.5147		1.75034		2507.14				49.8399			1.20067		0.483056		1.68372		2401.02				49.4421						1.74317		2074.75				50.8514
		T3R1	1.25098	0.0117154	0.520811	0.00763763	1.77179	0.0131561	2589.91	32.3771			48.9064	0.426581		1.21533	0.00854888	0.489	0.0055	1.70433	0.0105633	2422.72	32.7937			48.4953	0.488127					1.69417	0.0166308	2092.83	36.981			49.8944	0.433159
		T3R2	1.22831	0.00750555	0.516645	0.00980221	1.74496	0.0084113	2545.28	43.6884			50.4732	0.324224		1.1935	0.0114564	0.486167	0.0106927	1.67967	0.0209304	2380.13	41.6816			50.2638	0.041541					1.70667	0.0170098	2057.48	29.7714			52.4217	0.326762
		T3R3	1.28198	0.00867468	0.536145	0.00475219	1.81812	0.00503322	2690.81	49.4576			52.8038	0.122843		1.24733	0.0110604	0.5025	0.008544	1.74983	0.00321455	2531.56	37.118			52.5564	0.147263					1.74367	0.0106105	2186.24	29.5348			52.9231	0.0652126
		AverageT3	1.25376		0.524534		1.77829		2608.67				50.7278			1.21872		0.492556		1.71128		2444.8				50.4385						1.71483		2112.19				51.7464
		T4R1	1.21798	0.012816	0.513145	0.00809835	1.73112	0.00596518	2609.29	29.671			48.9745	0.350184		1.183	0.010332	0.484167	0.0112509	1.66717	0.00152753	2485.69	14.875			49.7683	0.879199					1.69733	0.00450925	2147.17	20.1015			49.8384	1.33647
		T4R2	1.21231	0.00812917	0.511478	0.00655744	1.72379	0.00202073	2739.06	17.9571			51.502	0.396268		1.17733	0.0123929	0.482	0.0065	1.65933	0.00680686	2551.56	17.9571			51.5495	0.343736					1.67383	0.00880814	2202.38	5.14668			52.3376	0.33017
		T4R3	1.27114	0.015885	0.526811	0.0104203	1.79796	0.00676387	2833.9	39.0523			53.068	0.235307		1.23483	0.0187705	0.496	0.0126194	1.73083	0.00825126	2646.4	39.0523			52.585	0.154823					1.721	0.0168893	2285.31	34.2543			53.3887	0.292754
		AverageT4	1.23381		0.517145		1.75096		2727.42				51.1815			1.19839		0.487389		1.68578		2561.22				51.3009						1.69739		2211.62				51.8549
		T1R1	1.1376	0.0049	0.4133	0.0016	1.551	0.0046	3892	31.1774			43.8911	0.429		1.123	0.0124	0.3887	0.0028	1.5117	0.0108	3697.47	30.6828			43.4761	0.1676					1.5667	0.0298	3205.64	28.5727			44.144	0.4297
		T2R2	1.1381	0.0118	0.412	0.0115	1.5501	0.0057	3888.31	24.9391			44.2872	0.4407		1.1202	0.0205	0.3885	0.004	1.5087	0.0199	3676.19	44.6588			44.1557	0.6287					1.5495	0.0087	3185.83	35.2456			44.5501	0.4298
		AverageT1	1.1379		0.4126		1.5505		3890.15				44.0891			1.1216		0.3886		1.5102		3686.83				43.8159						1.5581		3195.74				44.3471
		T2R1	1.0895	0.005	0.3803	0.0046	1.4698	0.0013	2563.11	23.0412			41.8074	0.1649		1.085	0.007	0.3708	0.0124	1.4558	0.0149	2395.52	24.8542			41.306	0.2362					1.481	0.0125	2076.2	24.3626			42.0596	0.0896
		T2R2	1.0306	0.009	0.3226	0.0153	1.3533	0.0103	2352.93	52.2242			42.5591	0.2049		1.0157	0.0095	0.3192	0.0058	1.3348	0.0112	2211.02	23.1528			41.9615	0.2075					1.3708	0.0221	1919.89	21.2041			42.8024	0.2093
		T2R3	0.9316	0.008	0.2478	0.0083	1.1795	0.0005	2091.59	67.2934			43.1996	0.2705		0.9138	0.0147	0.2423	0.0043	1.1562	0.0104	1941.93	61.2781			43.0816	0.2198					1.1892	0.0259	1686.72	54.1483			43.4865	0.2686
		AverageT2	1.0173		0.3169		1.3342		2335.88				42.522			1.0048		0.3108		1.3156		2182.82				42.1164						1.347		1894.27				42.7829
		T3R1	1.0473	0.0058	0.337	0.0035	1.3843	0.0034	2137.87	33.5949			40.1382	0.2577		1.0308	0.0085	0.3315	0.0131	1.3623	0.009	1977.09	26.3721			39.6503	0.088					1.3898	0.0046	1719.09	13.6394			40.3806	0.397
		T3R2	1.0616	0.002	0.342	0.0041	1.4036	0.0023	2371.78	49.7193			41.7847	0.3072		1.0533	0.014	0.3383	0.0051	1.3917	0.0168	2187.69	34.5209			41.2483	0.3038					1.4102	0.0194	1899.7	23.8491			42.0243	0.3161
		T3R3	1.1071	0.0126	0.3796	0.0103	1.4868	0.0023	2502.28	37.2885			44.7397	0.5355		1.0903	0.0206	0.365	0.0155	1.4553	0.027	2331.74	30.6156			44.324	0.2213					1.4747	0.0109	2023	19.6824			45.0353	0.5342
		AverageT3	1.072		0.3529		1.4249		2337.31				42.2208			1.0582		0.3449		1.4031		2165.51				41.7409						1.4249		1880.6				42.4801
		T4R1	1.0478	0.0088	0.3325	0.0069	1.3803	0.005	2382.71	69.7426			42.6952	0.2712		1.0275	0.0224	0.3227	0.0097	1.3502	0.0133	2215.12	47.847			41.9369	0.3713					1.3848	0.0088	1923.48	33.7809			42.9386	0.2779
		T4R2	1.0468	0.009	0.3443	0.0058	1.3911	0.0073	2413.02	17.5291			43.3248	0.197		1.0357	0.0054	0.3373	0.001	1.373	0.0059	2348.23	37.3351			43.0783	0.5559					1.3878	0.0123	2037	41.9054			43.6137	0.1993
		T4R3	1.075	0.0123	0.3496	0.0086	1.4246	0.0042	2719.58	65.4712			44.1281	0.3177		1.0668	0.0063	0.3427	0.0058	1.4095	0.0063	2532.08	92.2661			43.5169	0.1621					1.4365	0.0126	2197.67	113.868			44.385	0.3482
		AverageT4	1.0565		0.3421		1.3987		2505.1				43.3827			1.0433		0.3342		1.3776		2365.15				42.844						1.4031		2052.72				43.6458
		T1R1	1.301	0.0074	0.5566	0.0111	1.8576	0.0176	4134.61	74.5121			53.2992	0.3772		1.266	0.0087	0.5258	0.0089	1.7918	0.0132	3941.72	80.733			52.731	0.2306					1.8465	0.0268	3401.97	58.7334			53.3427	0.377
		T2R2	1.2973	0.0125	0.5596	0.0131	1.857	0.0075	4133.97	49.4322			53.4451	0.4722		1.2597	0.0139	0.5305	0.0123	1.7902	0.0056	3941.75	56.3773			52.9339	0.237					1.8167	0.0133	3403.47	82.1317			53.3896	0.9987
		AverageT1	1.2991		0.5581		1.8573		4134.29				53.3721			1.2628		0.5282		1.791		3941.74				52.8325						1.8316		3402.72				53.3662
		T2R1	1.284	0.0062	0.5395	0.008	1.8235	0.0039	2683.24	48.2958			49.6381	1.0866		1.2493	0.0072	0.5097	0.0068	1.759	0.011	2553.02	15.8261			49.4435	1.0289					1.8047	0.0288	2205.19	22.5621			50.6308	1.09
		T2R2	1.2621	0.009	0.5201	0.0064	1.7823	0.0085	2602.39	21.217			49.6494	0.6897		1.2272	0.0112	0.4885	0.0083	1.7157	0.0147	2512.43	18.3452			49.0734	0.9473					1.7698	0.0302	2169.81	10.5541			51.5909	0.6967
		T2R3	1.1608	0.0086	0.4845	0.0017	1.6453	0.0099	2235.78	14.1331			50.2322	0.2186		1.1255	0.0121	0.451	0.0052	1.5765	0.0163	2137.63	11.8134			49.8093	0.3795					1.655	0.0219	1849.26	9.3944			50.3324	0.2691
		AverageT2	1.2356		0.5147		1.7503		2507.14				49.8399			1.2007		0.4831		1.6837		2401.02				49.4421						1.7432		2074.75				50.8514
		T3R1	1.251	0.0117	0.5208	0.0076	1.7718	0.0132	2589.91	32.3771			48.9064	0.4266		1.2153	0.0085	0.489	0.0055	1.7043	0.0106	2422.72	32.7937			48.4953	0.4881					1.6942	0.0166	2092.83	36.981			49.8944	0.4332
		T3R2	1.2283	0.0075	0.5166	0.0098	1.745	0.0084	2545.28	43.6884			50.4732	0.3242		1.1935	0.0115	0.4862	0.0107	1.6797	0.0209	2380.13	41.6816			50.2638	0.0415					1.7067	0.017	2057.48	29.7714			52.4217	0.3268
		T3R3	1.282	0.0087	0.5361	0.0048	1.8181	0.005	2690.81	49.4576			52.8038	0.1228		1.2473	0.0111	0.5025	0.0085	1.7498	0.0032	2531.56	37.118			52.5564	0.1473					1.7437	0.0106	2186.24	29.5348			52.9231	0.0652
		AverageT3	1.2538		0.5245		1.7783		2608.67				50.7278			1.2187		0.4926		1.7113		2444.8				50.4385						1.7148		2112.19				51.7464
		T4R1	1.218	0.0128	0.5131	0.0081	1.7311	0.006	2609.29	29.671			48.9745	0.3502		1.183	0.0103	0.4842	0.0113	1.6672	0.0015	2485.69	14.875			49.7683	0.8792					1.6973	0.0045	2147.17	20.1015			49.8384	1.3365
		T4R2	1.2123	0.0081	0.5115	0.0066	1.7238	0.002	2739.06	17.9571			51.502	0.3963		1.1773	0.0124	0.482	0.0065	1.6593	0.0068	2551.56	17.9571			51.5495	0.3437					1.6738	0.0088	2202.38	5.1467			52.3376	0.3302
		T4R3	1.2711	0.0159	0.5268	0.0104	1.798	0.0068	2833.9	39.0523			53.068	0.2353		1.2348	0.0188	0.496	0.0126	1.7308	0.0083	2646.4	39.0523			52.585	0.1548					1.721	0.0169	2285.31	34.2543			53.3887	0.2928
		AverageT4	1.2338		0.5171		1.751		2727.42				51.1815			1.1984		0.4874		1.6858		2561.22				51.3009						1.6974		2211.62				51.8549
		T1R1	1.1376±0.0049	h	0.4133±0.0016	e	1.551±0.0046	h	3892±31.1774	b			43.8911±0.429	hi		1.123±0.0124	e	0.3887±0.0028	f	1.5117±0.0108	h	3697.4722±30.6828	b			43.4761±0.1676	gh					1.5667±0.0298	h	3205.6389±28.5727	b			44.144±0.4297	ef
		T2R2	1.1381±0.0118	h	0.412±0.0115	e	1.5501±0.0057	h	3888.3056±24.9391	b			44.2872±0.4407	gh		1.1202±0.0205	e	0.3885±0.004	f	1.5087±0.0199	h	3676.1944±44.6588	b			44.1557±0.6287	fg					1.5495±0.0087	h	3185.8333±35.2456	b			44.5501±0.4298	e
		AverageT1	1.1379		0.4126		1.5505		3890.15				44.0891			1.1216		0.3886		1.5102		3686.83				43.8159						1.5581		3195.74				44.3471
		T2R1	1.0895±0.005	j	0.3803±0.0046	f	1.4698±0.0013	j	2563.1111±23.0412	fg			41.8074±0.1649	l		1.085±0.007	fg	0.3708±0.0124	g	1.4558±0.0149	i	2395.5185±24.8542	fg			41.306±0.2362	i					1.481±0.0125	i	2076.2037±24.3626	ef			42.0596±0.0896	h
		T2R2	1.0306±0.009	m	0.3226±0.0153	i	1.3533±0.0103	n	2352.9259±52.2242	h			42.5591±0.2049	k		1.0157±0.0095	j	0.3192±0.0058	j	1.3348±0.0112	m	2211.0185±23.1528	hi			41.9615±0.2075	i					1.3708±0.0221	l	1919.8889±21.2041	g			42.8024±0.2093	gh
		T2R3	0.9316±0.008	n	0.2478±0.0083	j	1.1795±0.0005	o	2091.5926±67.2934	j			43.1996±0.2705	ijk		0.9138±0.0147	k	0.2423±0.0043	k	1.1562±0.0104	n	1941.9259±61.2781	j			43.0816±0.2198	h					1.1892±0.0259	m	1686.7222±54.1483	h			43.4865±0.2686	fg
		AverageT2	1.0173		0.3169		1.3342		2335.88				42.522			1.0048		0.3108		1.3156		2182.82				42.1164						1.347		1894.27				42.7829
		T3R1	1.0473±0.0058	l	0.337±0.0035	ghi	1.3843±0.0034	m	2137.8704±33.5949	j			40.1382±0.2577	m		1.0308±0.0085	ij	0.3315±0.0131	hij	1.3623±0.009	l	1977.0926±26.3721	j			39.6503±0.088	j					1.3898±0.0046	kl	1719.0926±13.6394	h			40.3806±0.397	i
		T3R2	1.0616±0.002	kl	0.342±0.0041	gh	1.4036±0.0023	l	2371.7778±49.7193	h			41.7847±0.3072	l		1.0533±0.014	hi	0.3383±0.0051	hi	1.3917±0.0168	jk	2187.6852±34.5209	hi			41.2483±0.3038	i					1.4102±0.0194	jk	1899.7037±23.8491	g			42.0243±0.3161	h
		T3R3	1.1071±0.0126	i	0.3796±0.0103	f	1.4868±0.0023	i	2502.2778±37.2885	g			44.7397±0.5355	g		1.0903±0.0206	f	0.365±0.0155	g	1.4553±0.027	i	2331.7407±30.6156	g			44.324±0.2213	f					1.4747±0.0109	i	2023±19.6824	f			45.0353±0.5342	e
		AverageT3	1.072		0.3529		1.4249		2337.31				42.2208			1.0582		0.3449		1.4031		2165.51				41.7409						1.4249		1880.6				42.4801
		T4R1	1.0478±0.0088	l	0.3325±0.0069	hi	1.3803±0.005	m	2382.7083±69.7426	h			42.6952±0.2712	jk		1.0275±0.0224	j	0.3227±0.0097	ij	1.3502±0.0133	lm	2215.125±47.847	h			41.9369±0.3713	i					1.3848±0.0088	kl	1923.4792±33.7809	g			42.9386±0.2779	gh
		T4R2	1.0468±0.009	l	0.3443±0.0058	gh	1.3911±0.0073	m	2413.0208±17.5291	h			43.3248±0.197	ij		1.0357±0.0054	ij	0.3373±0.001	hi	1.373±0.0059	kl	2348.2292±37.3351	fg			43.0783±0.5559	h					1.3878±0.0123	kl	2037±41.9054	f			43.6137±0.1993	fg
		T4R3	1.075±0.0123	jk	0.3496±0.0086	g	1.4246±0.0042	k	2719.5833±65.4712	d			44.1281±0.3177	gh		1.0668±0.0063	gh	0.3427±0.0058	h	1.4095±0.0063	j	2532.0833±92.2661	d			43.5169±0.1621	gh					1.4365±0.0126	j	2197.6667±113.8685	d			44.385±0.3482	ef
		AverageT4	1.0565		0.3421		1.3987		2505.1				43.3827			1.0433		0.3342		1.3776		2365.15				42.844						1.4031		2052.72				43.6458
		T1R1	1.301±0.0074	a	0.5566±0.0111	a	1.8576±0.0176	a	4134.6111±74.5121	a			53.2992±0.3772	a		1.266±0.0087	a	0.5258±0.0089	a	1.7918±0.0132	a	3941.7222±80.733	a			52.731±0.2306	a					1.8465±0.0268	a	3401.9722±58.7334	a			53.3427±0.377	a
		T2R2	1.2973±0.0125	ab	0.5596±0.0131	a	1.857±0.0075	a	4133.9722±49.4322	a			53.4451±0.4722	a		1.2597±0.0139	a	0.5305±0.0123	a	1.7902±0.0056	a	3941.75±56.3773	a			52.9339±0.237	a					1.8167±0.0133	b	3403.4722±82.1317	a			53.3896±0.9987	a
		AverageT1	1.2991		0.5581		1.8573		4134.29				53.3721			1.2628		0.5282		1.791		3941.74				52.8325						1.8316		3402.72				53.3662
		T2R1	1.284±0.0062	bc	0.5395±0.008	b	1.8235±0.0039	b	2683.2407±48.2958	de			49.6381±1.0866	de		1.2493±0.0072	ab	0.5097±0.0068	b	1.759±0.011	b	2553.0185±15.8261	d			49.4435±1.0289	cd					1.8047±0.0288	b	2205.1852±22.5621	d			50.6308±1.09	d
		T2R2	1.2621±0.009	de	0.5201±0.0064	c	1.7823±0.0085	d	2602.3889±21.217	f			49.6494±0.6897	de		1.2272±0.0112	bc	0.4885±0.0083	cd	1.7157±0.0147	de	2512.4259±18.3452	d			49.0734±0.9473	de					1.7698±0.0302	c	2169.8148±10.5541	d			51.5909±0.6967	c
		T2R3	1.1608±0.0086	g	0.4845±0.0017	d	1.6453±0.0099	g	2235.7778±14.1331	i			50.2322±0.2186	cd		1.1255±0.0121	e	0.451±0.0052	e	1.5765±0.0163	g	2137.6296±11.8134	i			49.8093±0.3795	cd					1.655±0.0219	g	1849.2593±9.3944	g			50.3324±0.2691	d
		AverageT2	1.2356		0.5147		1.7503		2507.14				49.8399			1.2007		0.4831		1.6837		2401.02				49.4421						1.7432		2074.75				50.8514
		T3R1	1.251±0.0117	e	0.5208±0.0076	c	1.7718±0.0132	d	2589.9074±32.3771	f			48.9064±0.4266	f		1.2153±0.0085	c	0.489±0.0055	cd	1.7043±0.0106	e	2422.7222±32.7937	ef			48.4953±0.4881	e					1.6942±0.0166	ef	2092.8333±36.981	ef			49.8944±0.4332	d
		T3R2	1.2283±0.0075	f	0.5166±0.0098	c	1.745±0.0084	e	2545.2778±43.6884	fg			50.4732±0.3242	c		1.1935±0.0115	d	0.4862±0.0107	cd	1.6797±0.0209	f	2380.1296±41.6816	fg			50.2638±0.0415	c					1.7067±0.017	e	2057.4815±29.7714	f			52.4217±0.3268	bc
		T3R3	1.282±0.0087	bc	0.5361±0.0048	b	1.8181±0.005	b	2690.8148±49.4576	d			52.8038±0.1228	a		1.2473±0.0111	ab	0.5025±0.0085	bc	1.7498±0.0032	bc	2531.5556±37.118	d			52.5564±0.1473	a					1.7437±0.0106	cd	2186.2407±29.5348	d			52.9231±0.0652	ab
		AverageT3	1.2538		0.5245		1.7783		2608.67				50.7278			1.2187		0.4926		1.7113		2444.8				50.4385						1.7148		2112.19				51.7464
		T4R1	1.218±0.0128	f	0.5131±0.0081	c	1.7311±0.006	f	2609.2917±29.671	ef			48.9745±0.3502	ef		1.183±0.0103	d	0.4842±0.0113	d	1.6672±0.0015	f	2485.6875±14.875	de			49.7683±0.8792	cd					1.6973±0.0045	ef	2147.1667±20.1015	de			49.8384±1.3365	d
		T4R2	1.2123±0.0081	f	0.5115±0.0066	c	1.7238±0.002	f	2739.0625±17.9571	d			51.502±0.3963	b		1.1773±0.0124	d	0.482±0.0065	d	1.6593±0.0068	f	2551.5625±17.9571	d			51.5495±0.3437	b					1.6738±0.0088	fg	2202.375±5.1467	d			52.3376±0.3302	bc
		T4R3	1.2711±0.0159	cd	0.5268±0.0104	bc	1.798±0.0068	c	2833.8958±39.0523	c			53.068±0.2353	a		1.2348±0.0188	bc	0.496±0.0126	bcd	1.7308±0.0083	cd	2646.3958±39.0523	c			52.585±0.1548	a					1.721±0.0169	de	2285.3125±34.2543	c			53.3887±0.2928	a
		AverageT4	1.2338		0.5171		1.751		2727.42				51.1815			1.1984		0.4874		1.6858		2561.22				51.3009						1.6974		2211.62				51.8549
				h		e		h		b				hi			e		f		h		b				gh						h		b				ef
				h		e		h		b				gh			e		f		h		b				fg						h		b				e
				j		f		j		fg				l			fg		g		i		fg				i						i		ef				h
				m		i		n		h				k			j		j		m		hi				i						l		g				gh
				n		j		o		j				ijk			k		k		n		j				h						m		h				fg
				l		ghi		m		j				m			ij		hij		l		j				j						kl		h				i
				kl		gh		l		h				l			hi		hi		jk		hi				i						jk		g				h
				i		f		i		g				g			f		g		i		g				f						i		f				e
				l		hi		m		h				jk			j		ij		lm		h				i						kl		g				gh
				l		gh		m		h				ij			ij		hi		kl		fg				h						kl		f				fg
				jk		g		k		d				gh			gh		h		j		d				gh						j		d				ef
				a		a		a		a				a			a		a		a		a				a						a		a				a
				ab		a		a		a				a			a		a		a		a				a						b		a				a
				bc		b		b		de				de			ab		b		b		d				cd						b		d				d
				de		c		d		f				de			bc		cd		de		d				de						c		d				c
				g		d		g		i				cd			e		e		g		i				cd						g		g				d
				e		c		d		f				f			c		cd		e		ef				e						ef		ef				d
				f		c		e		fg				c			d		cd		f		fg				c						e		f				bc
				bc		b		b		d				a			ab		bc		bc		d				a						cd		d				ab
				f		c		f		ef				ef			d		d		f		de				cd						ef		de				d
				f		c		f		d				b			d		d		f		d				b						fg		d				bc
				cd		bc		c		c				a			bc		bcd		cd		c				a						de		c				a
			Weight per panicle of superior grains(g)		Weight per panicle of inferior grains(g)		Weight per panicle(g)		Grain yield (kg hm-2)				Thousand grains weight (g)			Weight per panicle of superior grains(g)		Weight per panicle of inferior grains(g)		Weight per panicle(g)		Grain yield (kg hm-2)				Thousand grains weight (g)						Weight per panicle(g)		Grain yield (kg hm-2)				Thousand grains weight (g)
		T1R1	1.1376±0.0049h		0.4133±0.0016e		1.551±0.0046h		3892±31.1774b				43.8911±0.429hi			1.123±0.0124e		0.3887±0.0028f		1.5117±0.0108h		3697.4722±30.6828b				43.4761±0.1676gh						1.5667±0.0298h		3205.6389±28.5727b				44.144±0.4297ef
		T2R2	1.1381±0.0118h		0.412±0.0115e		1.5501±0.0057h		3888.3056±24.9391b				44.2872±0.4407gh			1.1202±0.0205e		0.3885±0.004f		1.5087±0.0199h		3676.1944±44.6588b				44.1557±0.6287fg						1.5495±0.0087h		3185.8333±35.2456b				44.5501±0.4298e
		AverageT1	1.1379		0.4126		1.5505		3890.15				44.0891			1.1216		0.3886		1.5102		3686.83				43.8159						1.5581		3195.74				44.3471
		T2R1	1.0895±0.005j		0.3803±0.0046f		1.4698±0.0013j		2563.1111±23.0412fg				41.8074±0.1649l			1.085±0.007fg		0.3708±0.0124g		1.4558±0.0149i		2395.5185±24.8542fg				41.306±0.2362i						1.481±0.0125i		2076.2037±24.3626ef				42.0596±0.0896h
		T2R2	1.0306±0.009m		0.3226±0.0153i		1.3533±0.0103n		2352.9259±52.2242h				42.5591±0.2049k			1.0157±0.0095j		0.3192±0.0058j		1.3348±0.0112m		2211.0185±23.1528hi				41.9615±0.2075i						1.3708±0.0221l		1919.8889±21.2041g				42.8024±0.2093gh
		T2R3	0.9316±0.008n		0.2478±0.0083j		1.1795±0.0005o		2091.5926±67.2934j				43.1996±0.2705ijk			0.9138±0.0147k		0.2423±0.0043k		1.1562±0.0104n		1941.9259±61.2781j				43.0816±0.2198h						1.1892±0.0259m		1686.7222±54.1483h				43.4865±0.2686fg
		AverageT2	1.0173		0.3169		1.3342		2335.88				42.522			1.0048		0.3108		1.3156		2182.82				42.1164						1.347		1894.27				42.7829
		T3R1	1.0473±0.0058l		0.337±0.0035ghi		1.3843±0.0034m		2137.8704±33.5949j				40.1382±0.2577m			1.0308±0.0085ij		0.3315±0.0131hij		1.3623±0.009l		1977.0926±26.3721j				39.6503±0.088j						1.3898±0.0046kl		1719.0926±13.6394h				40.3806±0.397i
		T3R2	1.0616±0.002kl		0.342±0.0041gh		1.4036±0.0023l		2371.7778±49.7193h				41.7847±0.3072l			1.0533±0.014hi		0.3383±0.0051hi		1.3917±0.0168jk		2187.6852±34.5209hi				41.2483±0.3038i						1.4102±0.0194jk		1899.7037±23.8491g				42.0243±0.3161h
		T3R3	1.1071±0.0126i		0.3796±0.0103f		1.4868±0.0023i		2502.2778±37.2885g				44.7397±0.5355g			1.0903±0.0206f		0.365±0.0155g		1.4553±0.027i		2331.7407±30.6156g				44.324±0.2213f						1.4747±0.0109i		2023±19.6824f				45.0353±0.5342e
		AverageT3	1.072		0.3529		1.4249		2337.31				42.2208			1.0582		0.3449		1.4031		2165.51				41.7409						1.4249		1880.6				42.4801
		T4R1	1.0478±0.0088l		0.3325±0.0069hi		1.3803±0.005m		2382.7083±69.7426h				42.6952±0.2712jk			1.0275±0.0224j		0.3227±0.0097ij		1.3502±0.0133lm		2215.125±47.847h				41.9369±0.3713i						1.3848±0.0088kl		1923.4792±33.7809g				42.9386±0.2779gh
		T4R2	1.0468±0.009l		0.3443±0.0058gh		1.3911±0.0073m		2413.0208±17.5291h				43.3248±0.197ij			1.0357±0.0054ij		0.3373±0.001hi		1.373±0.0059kl		2348.2292±37.3351fg				43.0783±0.5559h						1.3878±0.0123kl		2037±41.9054f				43.6137±0.1993fg
		T4R3	1.075±0.0123jk		0.3496±0.0086g		1.4246±0.0042k		2719.5833±65.4712d				44.1281±0.3177gh			1.0668±0.0063gh		0.3427±0.0058h		1.4095±0.0063j		2532.0833±92.2661d				43.5169±0.1621gh						1.4365±0.0126j		2197.6667±113.8685d				44.385±0.3482ef
		AverageT4	1.0565		0.3421		1.3987		2505.1				43.3827			1.0433		0.3342		1.3776		2365.15				42.844						1.4031		2052.72				43.6458
		T1R1	1.301±0.0074a		0.5566±0.0111a		1.8576±0.0176a		4134.6111±74.5121a				53.2992±0.3772a			1.266±0.0087a		0.5258±0.0089a		1.7918±0.0132a		3941.7222±80.733a				52.731±0.2306a						1.8465±0.0268a		3401.9722±58.7334a				53.3427±0.377a
		T2R2	1.2973±0.0125ab		0.5596±0.0131a		1.857±0.0075a		4133.9722±49.4322a				53.4451±0.4722a			1.2597±0.0139a		0.5305±0.0123a		1.7902±0.0056a		3941.75±56.3773a				52.9339±0.237a						1.8167±0.0133b		3403.4722±82.1317a				53.3896±0.9987a
		AverageT1	1.2991		0.5581		1.8573		4134.29				53.3721			1.2628		0.5282		1.791		3941.74				52.8325						1.8316		3402.72				53.3662
		T2R1	1.284±0.0062bc		0.5395±0.008b		1.8235±0.0039b		2683.2407±48.2958de				49.6381±1.0866de			1.2493±0.0072ab		0.5097±0.0068b		1.759±0.011b		2553.0185±15.8261d				49.4435±1.0289cd						1.8047±0.0288b		2205.1852±22.5621d				50.6308±1.09d
		T2R2	1.2621±0.009de		0.5201±0.0064c		1.7823±0.0085d		2602.3889±21.217f				49.6494±0.6897de			1.2272±0.0112bc		0.4885±0.0083cd		1.7157±0.0147de		2512.4259±18.3452d				49.0734±0.9473de						1.7698±0.0302c		2169.8148±10.5541d				51.5909±0.6967c
		T2R3	1.1608±0.0086g		0.4845±0.0017d		1.6453±0.0099g		2235.7778±14.1331i				50.2322±0.2186cd			1.1255±0.0121e		0.451±0.0052e		1.5765±0.0163g		2137.6296±11.8134i				49.8093±0.3795cd						1.655±0.0219g		1849.2593±9.3944g				50.3324±0.2691d
		AverageT2	1.2356		0.5147		1.7503		2507.14				49.8399			1.2007		0.4831		1.6837		2401.02				49.4421						1.7432		2074.75				50.8514
		T3R1	1.251±0.0117e		0.5208±0.0076c		1.7718±0.0132d		2589.9074±32.3771f				48.9064±0.4266f			1.2153±0.0085c		0.489±0.0055cd		1.7043±0.0106e		2422.7222±32.7937ef				48.4953±0.4881e						1.6942±0.0166ef		2092.8333±36.981ef				49.8944±0.4332d
		T3R2	1.2283±0.0075f		0.5166±0.0098c		1.745±0.0084e		2545.2778±43.6884fg				50.4732±0.3242c			1.1935±0.0115d		0.4862±0.0107cd		1.6797±0.0209f		2380.1296±41.6816fg				50.2638±0.0415c						1.7067±0.017e		2057.4815±29.7714f				52.4217±0.3268bc
		T3R3	1.282±0.0087bc		0.5361±0.0048b		1.8181±0.005b		2690.8148±49.4576d				52.8038±0.1228a			1.2473±0.0111ab		0.5025±0.0085bc		1.7498±0.0032bc		2531.5556±37.118d				52.5564±0.1473a						1.7437±0.0106cd		2186.2407±29.5348d				52.9231±0.0652ab
		AverageT3	1.2538		0.5245		1.7783		2608.67				50.7278			1.2187		0.4926		1.7113		2444.8				50.4385						1.7148		2112.19				51.7464
		T4R1	1.218±0.0128f		0.5131±0.0081c		1.7311±0.006f		2609.2917±29.671ef				48.9745±0.3502ef			1.183±0.0103d		0.4842±0.0113d		1.6672±0.0015f		2485.6875±14.875de				49.7683±0.8792cd						1.6973±0.0045ef		2147.1667±20.1015de				49.8384±1.3365d
		T4R2	1.2123±0.0081f		0.5115±0.0066c		1.7238±0.002f		2739.0625±17.9571d				51.502±0.3963b			1.1773±0.0124d		0.482±0.0065d		1.6593±0.0068f		2551.5625±17.9571d				51.5495±0.3437b						1.6738±0.0088fg		2202.375±5.1467d				52.3376±0.3302bc
		T4R3	1.2711±0.0159cd		0.5268±0.0104bc		1.798±0.0068c		2833.8958±39.0523c				53.068±0.2353a			1.2348±0.0188bc		0.496±0.0126bcd		1.7308±0.0083cd		2646.3958±39.0523c				52.585±0.1548a						1.721±0.0169de		2285.3125±34.2543c				53.3887±0.2928a
		AverageT4	1.2338		0.5171		1.751		2727.42				51.1815			1.1984		0.4874		1.6858		2561.22				51.3009						1.6974		2211.62				51.8549
	Year	Treatment	Weight per panicle of superior grains(g)	Weight per panicle of inferior grains(g)	Weight per panicle(g)	Panicle number	Grain yield (kg hm-2)	Thousand grains weight (g)
	2020	AT1R1	1.1376±0.0049h	0.4133±0.0016e	1.551±0.0046h	107.5556±1.1706a	3892±31.1774b	43.8911±0.429hi
		AT2R2	1.1381±0.0118h	0.412±0.0115e	1.5501±0.0057h	107.1111±0.6939a	3888.3056±24.9391b	44.2872±0.4407gh
		AverageAT1	1.1379	0.4126	1.5505	107.333	3890.15	44.0891
		AT2R1	1.0895±0.005j	0.3803±0.0046f	1.4698±0.0013j	102.4444±1.1706c	2563.1111±23.0412fg	41.8074±0.1649l
		AT2R2	1.0306±0.009m	0.3226±0.0153i	1.3533±0.0103n	104.4444±1.3472b	2352.9259±52.2242h	42.5591±0.2049k
		AT2R3	0.9316±0.008n	0.2478±0.0083j	1.1795±0.0005o	93.2222±1.0184j	2091.5926±67.2934j	43.1996±0.2705ijk
		AverageAT2	1.0173	0.3169	1.3342	100.037	2335.88	42.522
		AT3R1	1.0473±0.0058l	0.337±0.0035ghi	1.3843±0.0034m	100.6667±1.7638de	2137.8704±33.5949j	40.1382±0.2577m
		AT3R2	1.0616±0.002kl	0.342±0.0041gh	1.4036±0.0023l	103.3333±0.3333bc	2371.7778±49.7193h	41.7847±0.3072l
		AT3R3	1.1071±0.0126i	0.3796±0.0103f	1.4868±0.0023i	106.1111±0.5092a	2502.2778±37.2885g	44.7397±0.5355g
		AverageAT3	1.072	0.3529	1.4249	103.37	2337.31	42.2208
		AT4R1	1.0478±0.0088l	0.3325±0.0069hi	1.3803±0.005m	93.6667±0.8819ij	2382.7083±69.7426h	42.6952±0.2712jk
		AT4R2	1.0468±0.009l	0.3443±0.0058gh	1.3911±0.0073m	95.1111±0.6939hi	2413.0208±17.5291h	43.3248±0.197ij
		AT4R3	1.075±0.0123jk	0.3496±0.0086g	1.4246±0.0042k	104.3333±0.8819b	2719.5833±65.4712d	44.1281±0.3177gh
		AverageAT4	1.0565	0.3421	1.3987	97.7037	2505.1	43.3827
		BT1R1	1.301±0.0074a	0.5566±0.0111a	1.8576±0.0176a	89±1.453mn	4134.6111±74.5121a	53.2992±0.3772a
		BT2R2	1.2973±0.0125ab	0.5596±0.0131a	1.857±0.0075a	88.7778±1.0184mn	4133.9722±49.4322a	53.4451±0.4722a
		AverageBT1	1.2991	0.5581	1.8573	88.8889	4134.29	53.3721
		BT2R1	1.284±0.0062bc	0.5395±0.008b	1.8235±0.0039b	89.8889±0.6939lm	2683.2407±48.2958de	49.6381±1.0866de
		BT2R2	1.2621±0.009de	0.5201±0.0064c	1.7823±0.0085d	91.1111±0.5092kl	2602.3889±21.217f	49.6494±0.6897de
		BT2R3	1.1608±0.0086g	0.4845±0.0017d	1.6453±0.0099g	85.7778±0.6939o	2235.7778±14.1331i	50.2322±0.2186cd
		AverageBT2	1.2356	0.5147	1.7503	88.9259	2507.14	49.8399
		BT3R1	1.251±0.0117e	0.5208±0.0076c	1.7718±0.0132d	89.8889±0.6939lm	2589.9074±32.3771f	48.9064±0.4266f
		BT3R2	1.2283±0.0075f	0.5166±0.0098c	1.745±0.0084e	89.4444±0.5092lm	2545.2778±43.6884fg	50.4732±0.3242c
		BT3R3	1.282±0.0087bc	0.5361±0.0048b	1.8181±0.005b	92.1111±0.6939jk	2690.8148±49.4576d	52.8038±0.1228a
		AverageBT3	1.2538	0.5245	1.7783	90.4815	2608.67	50.7278
		BT4R1	1.218±0.0128f	0.5131±0.0081c	1.7311±0.006f	81±0.6667rst	2609.2917±29.671ef	48.9745±0.3502ef
		BT4R2	1.2123±0.0081f	0.5115±0.0066c	1.7238±0.002f	83.1111±0.5092pq	2739.0625±17.9571d	51.502±0.3963b
		BT4R3	1.2711±0.0159cd	0.5268±0.0104bc	1.798±0.0068c	79.6667±0.8819t	2833.8958±39.0523c	53.068±0.2353a
		AverageBT4	1.2338	0.5171	1.751	81.2593	2727.42	51.1815
	2021	AT1R1	1.123±0.0124e	0.3887±0.0028f	1.5117±0.0108h	107.2222±1.8359a	3697.4722±30.6828b	43.4761±0.1676gh
		AT2R2	1.1202±0.0205e	0.3885±0.004f	1.5087±0.0199h	107±0.3333a	3676.1944±44.6588b	44.1557±0.6287fg
		AverageAT1	1.1216	0.3886	1.5102	107.111	3686.83	43.8159
		AT2R1	1.085±0.007fg	0.3708±0.0124g	1.4558±0.0149i	101.8889±1.262cd	2395.5185±24.8542fg	41.306±0.2362i
		AT2R2	1.0157±0.0095j	0.3192±0.0058j	1.3348±0.0112m	104.7778±0.5092b	2211.0185±23.1528hi	41.9615±0.2075i
		AT2R3	0.9138±0.0147k	0.2423±0.0043k	1.1562±0.0104n	92.4444±1.3878kl	1941.9259±61.2781j	43.0816±0.2198h
		AverageAT2	1.0048	0.3108	1.3156	99.7037	2182.82	42.1164
		AT3R1	1.0308±0.0085ij	0.3315±0.0131hij	1.3623±0.009l	99.7778±1.6443ef	1977.0926±26.3721j	39.6503±0.088j
		AT3R2	1.0533±0.014hi	0.3383±0.0051hi	1.3917±0.0168jk	103.4444±2.5892bc	2187.6852±34.5209hi	41.2483±0.3038i
		AT3R3	1.0903±0.0206f	0.365±0.0155g	1.4553±0.027i	107.7778±0.8389a	2331.7407±30.6156g	44.324±0.2213f
		AverageAT3	1.0582	0.3449	1.4031	103.667	2165.51	41.7409
		AT4R1	1.0275±0.0224j	0.3227±0.0097ij	1.3502±0.0133lm	93.6667±0.3333jk	2215.125±47.847h	41.9369±0.3713i
		AT4R2	1.0357±0.0054ij	0.3373±0.001hi	1.373±0.0059kl	95±0.3333ij	2348.2292±37.3351fg	43.0783±0.5559h
		AT4R3	1.0668±0.0063gh	0.3427±0.0058h	1.4095±0.0063j	104.4444±0.5092b	2532.0833±92.2661d	43.5169±0.1621gh
		AverageAT4	1.0433	0.3342	1.3776	97.7037	2365.15	42.844
		BT1R1	1.266±0.0087a	0.5258±0.0089a	1.7918±0.0132a	90±1.453mnop	3941.7222±80.733a	52.731±0.2306a
		BT2R2	1.2597±0.0139a	0.5305±0.0123a	1.7902±0.0056a	90.5556±1.8359lmno	3941.75±56.3773a	52.9339±0.237a
		AverageBT1	1.2628	0.5282	1.791	90.2778	3941.74	52.8325
		BT2R1	1.2493±0.0072ab	0.5097±0.0068b	1.759±0.011b	89.6667±1op	2553.0185±15.8261d	49.4435±1.0289cd
		BT2R2	1.2272±0.0112bc	0.4885±0.0083cd	1.7157±0.0147de	90.1111±0.6939mnop	2512.4259±18.3452d	49.0734±0.9473de
		BT2R3	1.1255±0.0121e	0.451±0.0052e	1.5765±0.0163g	85.5556±0.5092rs	2137.6296±11.8134i	49.8093±0.3795cd
		AverageBT2	1.2007	0.4831	1.6837	88.4444	2401.02	49.4421
		BT3R1	1.2153±0.0085c	0.489±0.0055cd	1.7043±0.0106e	89.6667±0.3333op	2422.7222±32.7937ef	48.4953±0.4881e
		BT3R2	1.1935±0.0115d	0.4862±0.0107cd	1.6797±0.0209f	89.7778±0.8389nop	2380.1296±41.6816fg	50.2638±0.0415c
		BT3R3	1.2473±0.0111ab	0.5025±0.0085bc	1.7498±0.0032bc	91.8889±0.5092klm	2531.5556±37.118d	52.5564±0.1473a
		AverageBT3	1.2187	0.4926	1.7113	90.4444	2444.8	50.4385
		BT4R1	1.183±0.0103d	0.4842±0.0113d	1.6672±0.0015f	80.6667±0.6667uvw	2485.6875±14.875de	49.7683±0.8792cd
		BT4R2	1.1773±0.0124d	0.482±0.0065d	1.6593±0.0068f	82.5556±0.6939tu	2551.5625±17.9571d	51.5495±0.3437b
		BT4R3	1.2348±0.0188bc	0.496±0.0126bcd	1.7308±0.0083cd	78.8889±0.6939w	2646.3958±39.0523c	52.585±0.1548a
		AverageBT4	1.1984	0.4874	1.6858	80.7037	2561.22	51.3009
	2022	AT1R1	—	—	1.5667±0.0298h	107±2.0817a	3205.6389±28.5727b	44.144±0.4297ef
		AT2R2	—	—	1.5495±0.0087h	106.8889±0.5092a	3185.8333±35.2456b	44.5501±0.4298e
		AverageAT1	—	—	1.5581	106.944	3195.74	44.3471
		AT2R1	—	—	1.481±0.0125i	102.5556±1.8954cd	2076.2037±24.3626ef	42.0596±0.0896h
		AT2R2	—	—	1.3708±0.0221l	104.7778±0.8389b	1919.8889±21.2041g	42.8024±0.2093gh
		AT2R3	—	—	1.1892±0.0259m	92.8889±1.3472ijk	1686.7222±54.1483h	43.4865±0.2686fg
		AverageAT2	—	—	1.347	100.074	1894.27	42.7829
		AT3R1	—	—	1.3898±0.0046kl	100±1.453e	1719.0926±13.6394h	40.3806±0.397i
		AT3R2	—	—	1.4102±0.0194jk	103.6667±2.6667bc	1899.7037±23.8491g	42.0243±0.3161h
		AT3R3	—	—	1.4747±0.0109i	107.5556±0.3849a	2023±19.6824f	45.0353±0.5342e
		AverageAT3	—	—	1.4249	103.741	1880.6	42.4801
		AT4R1	—	—	1.3848±0.0088kl	93.4444±1.0715ij	1923.4792±33.7809g	42.9386±0.2779gh
		AT4R2	—	—	1.3878±0.0123kl	94.8889±0.6939hi	2037±41.9054f	43.6137±0.1993fg
		AT4R3	—	—	1.4365±0.0126j	104.3333±0.3333bc	2197.6667±113.8685d	44.385±0.3482ef
		AverageAT4	—	—	1.4031	97.5556	2052.72	43.6458
		BT1R1	—	—	1.8465±0.0268a	90.5556±0.6939lmno	3401.9722±58.7334a	53.3427±0.377a
		BT2R2	—	—	1.8167±0.0133b	90.8889±1.6777klmn	3403.4722±82.1317a	53.3896±0.9987a
		AverageBT1	—	—	1.8316	90.7222	3402.72	53.3662
		BT2R1	—	—	1.8047±0.0288b	89.6667±0.8819no	2205.1852±22.5621d	50.6308±1.09d
		BT2R2	—	—	1.7698±0.0302c	90.2222±0.1925mno	2169.8148±10.5541d	51.5909±0.6967c
		BT2R3	—	—	1.655±0.0219g	85.5556±0.8389qr	1849.2593±9.3944g	50.3324±0.2691d
		AverageBT2	—	—	1.7432	88.4815	2074.75	50.8514
		BT3R1	—	—	1.6942±0.0166ef	89.8889±1.0184mno	2092.8333±36.981ef	49.8944±0.4332d
		BT3R2	—	—	1.7067±0.017e	90.2222±0.7698mno	2057.4815±29.7714f	52.4217±0.3268bc
		BT3R3	—	—	1.7437±0.0106cd	92.1111±1.0184jklm	2186.2407±29.5348d	52.9231±0.0652ab
		AverageBT3	—	—	1.7148	90.7407	2112.19	51.7464
		BT4R1	—	—	1.6973±0.0045ef	80.7778±1.3472uvw	2147.1667±20.1015de	49.8384±1.3365d
		BT4R2	—	—	1.6738±0.0088fg	82.1111±0.3849tu	2202.375±5.1467d	52.3376±0.3302bc
		BT4R3	—	—	1.721±0.0169de	78.6667±0.3333wx	2285.3125±34.2543c	53.3887±0.2928a
		AverageBT4	—	—	1.6974	80.5185	2211.62	51.8549
[truncated: 18 more columns]

## Sheet: Table2 (1)
															2020			2021			2022
	2020				2021				2022						Economic benefit			Economic benefit			Economic benefit																							tr6
	Grain income				Grain income				Grain income						1517.88	12.1592	a	1517.88	12.1592	a	1517.88±12.1592a			1517.88	12.1592	a	1517.88	12.1592	a	1517.88±12.1592a					Year	Treatment	Grain income (US$ ha−1)	Bypass cost (US$ ha−1)	Drip tape cost (US$ ha−1)	Other inputs (US$ ha−1)	Economic benefit (US$ ha−1)
ATR4R1	3858.5	7753.54	3023.88	ATR4R1	3670	7342.54	2863.59	ATR4R1	3183.58	6376.17	2486.7				1516.44	9.72626	a	1516.44	9.7263	a	1516.4392±9.7263a			1516.44	9.72626	a	1516.44	9.7263	a	1516.4392±9.7263a					2020	ATR4	3024.8021±2.1973c	20.202	466.667	500.9	2037.0334±2.1973e
ATR4R1	3897.33	7751.83	3023.22	ATR4R1	3691.83	7336.83	2861.36	ATR4R1	3195.42	6355.33	2478.58				694.449	13.1253	de	694.449	13.1253	de	694.4492±13.1253de			999.613	8.98608	c	999.613	8.9861	c	999.6133±8.9861c						ATR6	2712.4608±7.2329g	13.468	311.111	500.9	1886.9817±7.2329g		ATR4	3023.88	3024.8	2.19732	3024.8	2.1973	c
ATR4R1	3920.17	7762.33	3027.31	ATR4R1	3730.58	7328.62	2858.16	ATR4R1	3237.92	6370.08	2484.33				721.018	11.5882	d	721.018	11.5882	d	721.0179±11.5882d			917.641	20.3674	d	917.641	20.3674	d	917.6411±20.3674d						ATR6L	2751.6667±7.7784f	13.468	311.111	500.9	1926.1876±7.7784f		ATR4	3023.22			2712.46	7.2329	g
ATR4R2	3873			ATR4R2	3628.33			ATR4R2	3159.33						605.957	12.8599	f	605.957	12.8599	f	605.9571±12.8599f			815.721	26.2444	e	815.721	26.2444	e	815.7211±26.2444e						ATR6S	2967.8675±8.8299d	15.1515	350	500.9	2101.816±8.8299d		ATR4	3027.31			2751.67	7.7784	f
ATR4R2	3874.83			ATR4R2	3683.5			ATR4R2	3172.33						448.608	21.2796	i	448.608	21.2796	i	448.6083±21.2796i			833.769	13.102	e	833.769	13.102	e	833.7694±13.102e						BTR4	3199.2675±6.1379a	20.202	466.667	500.9	2211.4988±6.1379c		ATR6	2708.65	2712.46	7.23294	2967.87	8.8299	d
ATR4R2	3917.08			ATR4R2	3716.75			ATR4R2	3225.83						625.863	19.5405	f	625.863	19.5405	f	625.8633±19.5405f			924.993	19.3905	d	924.993	19.3905	d	924.9933±19.3905d						BTR6	2917.3408±7.2639e	13.468	311.111	500.9	2091.8617±7.2639d		ATR6	2707.93			3199.27	6.1379	a
ATR8R1	1761.17	6318.08	2464.05	ATR8R1	1628.38	5819.08	2269.44	ATR8R1	1417.79	5056.35	1971.98				681.883	15.9223	e	681.883	15.9223	e	681.8825±15.9223e			975.888	14.5425	c	975.888	14.5425	c	975.8883±14.5425c						BTR6L	3071.1886±12.1315b	13.468	311.111	500.9	2245.7095±12.1315b		ATR6	2720.8			2917.34	7.2639	e
ATR8R1	1761.25	6334.79	2470.57	ATR8R1	1637.79	5839.79	2277.52	ATR8R1	1422.96	5087.52	1984.13				605.345	11.4626	f	605.345	11.4626	f	605.345±11.4626f			929.256	27.1996	d	929.256	27.1996	d	929.2563±27.1996d						BTR6S	3198.4956±9.6203a	15.1515	350	500.9	2332.4441±9.6203a		ATR6L	2745.97	2751.67	7.77839	3071.19	12.1315	b
ATR8R1	1819.5	6335.42	2470.81	ATR8R1	1699.17	5866.71	2288.02	ATR8R1	1463.25	5084.92	1983.12				558.025	27.3213	g	558.025	27.3213	g	558.025±27.3213g			941.078	6.83637	d	941.078	6.8364	d	941.0781±6.8364d					2021	ATR4	2861.04±2.7283d	20.202	466.667	500.9	1873.2713±2.7283e		ATR6L	2760.53			3198.5	9.6203	a
ATR8R2	1816.75			ATR8R2	1691.21			ATR8R2	1459.42						763.496	7.81233	c	763.496	7.8123	c	763.4965±7.8123c			1060.64	25.5338	b	1060.64	25.5338	b	1060.6375±25.5338b						ATR6	2541.1317±11.8429f	13.468	311.111	500.9	1715.6526±11.8429f		ATR6L	2748.5			2861.04	2.7283	d
ATR8R2	1854.08			ATR8R2	1727.42			ATR8R2	1499.71						794.677	8.2887	b	794.677	8.2887	b	794.677±8.2887b			1637.41	33.8244	a	1637.41	33.8244	a	1637.415±33.8244a						ATR6L	2548.0542±7.6894f	13.468	311.111	500.9	1722.5751±7.6894f		ATR6S	2957.77	2967.87	8.82988	2541.13	11.8429	f
ATR8R2	1875.46			ATR8R2	1747			ATR8R2	1521.12						713.577	32.1408	d	713.577	32.1408	d	713.5765±32.1408d			1593.83	24.4191	b	1593.83	24.4191	b	1593.8325±24.4191b						ATR6S	2811.0144±6.4726e	15.1515	350	500.9	1944.9629±6.4726d		ATR6S	2974.15			2548.05	7.6894	f
ATR8R3	1531.21			ATR8R3	1405.92			ATR8R3	1215.29						521.274	15.8926	h	521.274	15.8926	h	521.274±15.8926h			1046.46	18.8354	def	1046.46	18.8354	def	1046.4639±18.8354def						BTR4	3036.2475±8.2234a	20.202	466.667	500.9	2048.4788±8.2234b		ATR6S	2971.68			2811.01	6.4726	e
ATR8R3	1538.42			ATR8R3	1408.25			ATR8R3	1230.58						1637.41	33.8244	a	1637.41	33.8244	a	1637.415±33.8244a			1014.93	8.27462	fg	1014.93	8.2746	fg	1014.9317±8.2746fg						BTR6	2802.0128±6.177e	13.468	311.111	500.9	1976.5337±6.177c		BTR4	3192.86	3199.27	6.13792	3036.25	8.2234	a
ATR8R3	1591.58			ATR8R3	1464.33			ATR8R3	1274.38						1593.83	24.4191	b	1593.83	24.4191	b	1593.8325±24.4191b			871.953	5.5119	h	871.953	5.5119	h	871.9533±5.5119h						BTR6L	2877.6656±12.7691c	13.468	311.111	500.9	2052.1865±12.7691b		BTR4	3205.1			2802.01	6.177	e
ATR8R4	1107.58			ATR8R4	1012			ATR8R4	887.875						811.395	31.8068	cde	811.395	31.8068	cde	811.395±31.8068cde			1010.06	12.6271	g	1010.06	12.6271	g	1010.0639±12.6271g						BTR6S	3019.8634±2.6935b	15.1515	350	500.9	2153.8119±2.6935a		BTR4	3199.84			2877.67	12.7691	c
ATR8R4	1131.5			ATR8R4	1033.25			ATR8R4	909.292						817.76	16.0954	cd	817.76	16.0954	cd	817.7596±16.0954cd			992.658	17.0385	g	992.658	17.0385	g	992.6583±17.0385g					2022	ATR4	2483.2058±4.178c	20.202	466.667	500.9	1495.4371±4.178f		BTR6	2909.1	2917.34	7.26393	3019.86	2.6935	b
ATR8R4	1211.75			ATR8R4	1081.5			ATR8R4	937.833						746.178	37.6612	fg	746.178	37.6612	fg	746.1783±37.6612fg			1049.42	19.2885	de	1049.42	19.2885	de	1049.4178±19.2885de						ATR6	2205.8869±7.0812f	13.468	311.111	500.9	1380.4078±7.0812g		BTR6	2920.12			2483.21	4.178	c
ATR8LR1	1548.17	6436.44	2510.21	ATR8LR1	1424.58	5938.62	2316.06	ATR8LR1	1244.04	5150.65	2008.75				605.616	24.2844	i	605.616	24.2844	i	605.6158±24.2844i			1017.62	11.5717	efg	1017.62	11.5717	efg	1017.6238±11.5717efg						ATR6L	2208.2486±9.0298f	13.468	311.111	500.9	1382.7695±9.0298g		BTR6	2922.8			2205.89	7.0812	f
ATR8LR1	1622.75	6481.83	2527.91	ATR8LR1	1498.67	5983.12	2333.42	ATR8LR1	1304.5	5195.29	2026.16				750.49	19.5171	fg	750.49	19.5171	fg	750.49±19.5171fg			1068.23	7.00326	d	1068.23	7.0033	d	1068.2344±7.0033d						ATR6S	2447.0144±3.0779d	15.1515	350	500.9	1580.9629±3.0779e		BTR6L	3058.32	3071.19	12.1315	2208.25	9.0298	f
ATR8LR1	1643.42	6477.71	2526.31	ATR8LR1	1516.83	5976.65	2330.89	ATR8LR1	1309.17	5175.9	2018.6				783.353	9.2451	def	783.353	9.2451	def	783.3529±9.2451def			1105.22	15.2304	c	1105.22	15.2304	c	1105.2194±15.2304c						BTR4	2623.0967±9.5503a	20.202	466.667	500.9	1635.328±9.5503c		BTR6L	3082.41			2447.01	3.0779	d
ATR8LR2	1701.33			ATR8LR2	1577.33			ATR8LR2	1360.83						725.27	19.5226	g	725.27	19.5226	g	725.27±19.5226g			1442.01	11.9663	a	1442.01	11.9663	a	1442.0142±11.9663a						BTR6	2420.5386±3.7966e	13.468	311.111	500.9	1595.0595±3.7966d		BTR6L	3072.84			2623.1	9.5503	a
ATR8LR2	1769.92			ATR8LR2	1644.25			ATR8LR2	1427.58						563.23	27.9937	j	563.23	27.9937	j	563.2304±27.9937j			1433.72	17.4169	a	1433.72	17.4169	a	1433.7158±17.4169a						BTR6L	2484.4553±16.3001c	13.468	311.111	500.9	1658.9762±16.3001b		BTR6S	3194.36	3198.5	9.6203	2420.54	3.7966	e
ATR8LR2	1774			ATR8LR2	1649.96			ATR8LR2	1435.38						775.872	9.82054	ef	775.872	9.8205	ef	775.8725±9.8205ef			934.252	9.69312	c	934.252	9.6931	c	934.2522±9.6931c						BTR6S	2602.7381±2.5382b	15.1515	350	500.9	1736.6866±2.5382a		BTR6S	3191.64			2484.46	16.3001	c
ATR8LR3	1529.5			ATR8LR3	1407.75			ATR8LR3	1217.71						831.135	3.92596	c	831.135	3.926	c	831.1355±3.926c			862.297	9.0296	d	862.297	9.0296	d	862.2972±9.0296d													BTR6S	3209.49			2602.74	2.5382	b
ATR8LR3	1541.62			ATR8LR3	1416.96			ATR8LR3	1238.75						767.598	12.668	f	767.598	12.668	f	767.598±12.668f			757.351	23.8985	e	757.351	23.8985	e	757.3511±23.8985e													ATR4	2863.59	2861.04	2.72831
ATR8LR3	1585.38			ATR8LR3	1458.46			ATR8LR3	1269.83						652.346	9.12501	h	652.346	9.125	h	652.3465±9.125h			771.066	10.2851	e	771.066	10.2851	e	771.0661±10.2851e													ATR4	2861.36
ATR8LR4	1383.04			ATR8LR4	1258.88			ATR8LR4	1102.33						1442.01	11.9663	a	1442.01	11.9663	a	1442.0142±11.9663a			853.197	13.4632	d	853.197	13.4632	d	853.1972±13.4632d													ATR4	2858.16
ATR8LR4	1398.21			ATR8LR4	1271.04			ATR8LR4	1109.54						1433.72	17.4169	a	1433.72	17.4169	a	1433.7158±17.4169a			909.379	11.9401	c	909.379	11.9401	c	909.3789±11.9401c													ATR6	2532.03	2541.13	11.8429
ATR8LR4	1511.25			ATR8LR4	1387.71			ATR8LR4	1198.79						645.493	14.9926	cd	645.493	14.9926	cd	645.4933±14.9926cd			863.899	18.6603	d	863.899	18.6603	d	863.8988±18.6603d													ATR6	2536.84
ATR8SR1	1941	7076.38	2759.79	ATR8SR1	1899.3	6802.62	2653.02	ATR8SR1	1652.1	5918.93	2308.38				671.531	11.0392	c	671.531	11.0392	c	671.5313±11.0392c			915.809	14.5607	c	915.809	14.5607	c	915.8094±14.5607c													ATR6	2554.52
ATR8SR1	1952.15	7069.38	2757.06	ATR8SR1	1941.35	6805.57	2654.17	ATR8SR1	1673.2	5906.9	2303.69				556.205	12.8988	e	556.205	12.8988	e	556.205±12.8988e			987.513	35.9838	b	987.513	35.9838	b	987.5125±35.9838b													ATR6L	2543.02	2548.05	7.68945
ATR8SR1	1979.9	7109.82	2772.83	ATR8SR1	1961.3	6833.27	2664.98	ATR8SR1	1701.6	5935.62	2314.89				406.478	13.8892	g	406.478	13.8892	g	406.4775±13.8892g			1537.27	31.4859	a	1537.27	31.4859	a	1537.2717±31.4859a													ATR6L	2556.91
ATR8SR2	2013.7			ATR8SR2	1980.85			ATR8SR2	1719.2						577.211	19.0585	e	577.211	19.0585	e	577.2108±19.0585e			1497.2	22.1125	b	1497.2	22.1125	b	1497.1992±22.1125b													ATR6L	2544.24
ATR8SR2	2044.9			ATR8SR2	1994			ATR8SR2	1724.5						633.3	15.7494	d	633.3	15.7494	d	633.3004±15.7494d			995.677	6.17216	d	995.677	6.1722	d	995.6772±6.1722d													ATR6S	2803.8	2811.01	6.47259
ATR8SR2	2054.3			ATR8SR2	2002.85			ATR8SR2	1732.7						556.812	10.5353	e	556.812	10.5353	e	556.8117±10.5353e			979.846	7.15464	d	979.846	7.1546	d	979.8461±7.1546d													ATR6S	2812.95
ATR8SR3	1773.2			ATR8SR3	1622.5			ATR8SR3	1417.6						509.291	27.7408	f	509.291	27.7408	f	509.2913±27.7408f			833.676	4.60723	g	833.676	4.6072	g	833.6756±4.6072g													ATR6S	2816.3
ATR8SR3	1791.6			ATR8SR3	1653.6			ATR8SR3	1438						754.254	12.3434	b	754.254	12.3434	b	754.2535±12.3434b			944.862	12.7896	ef	944.862	12.7896	ef	944.8617±12.7896ef													BTR4	3038.08	3036.25	8.22335
ATR8SR3	1924.25			ATR8SR3	1773.05			ATR8SR3	1530.05						777.101	4.31723	b	777.101	4.3172	b	777.101±4.3172b			928.251	16.2558	f	928.251	16.2558	f	928.2506±16.2558f													BTR4	3027.26
ATR8SR4	1306.4			ATR8SR4	1255.35			ATR8SR4	1090.5						656.389	30.9965	cd	656.389	30.9965	cd	656.3895±30.9965cd			987.307	14.476	d	987.307	14.476	d	987.3067±14.476d													BTR4	3043.4
ATR8SR4	1320.45			ATR8SR4	1269.45			ATR8SR4	1114.75						496.015	6.94009	f	496.015	6.9401	f	496.015±6.9401f			969.418	5.80125	de	969.418	5.8012	de	969.4181±5.8012de													BTR6	2800.18	2802.01	6.17696
ATR8SR4	1382.95			ATR8SR4	1290.7			ATR8SR4	1128.6						1537.27	31.4859	a	1537.27	31.4859	a	1537.2717±31.4859a			995.109	7.00326	d	995.109	7.0033	d	995.1094±7.0033d													BTR6	2796.96
ATR6R1	2542.83	6945.25	2708.65	ATR6R1	2372.61	6492.39	2532.03	ATR6R1	2060.61	5641.67	2200.25				1497.2	22.1125	b	1497.2	22.1125	b	1497.1992±22.1125b			1032.09	15.2304	c	1032.09	15.2304	c	1032.0944±15.2304c													BTR6	2808.9
ATR6R1	2558.33	6943.42	2707.93	ATR6R1	2392	6504.72	2536.84	ATR6R1	2063.72	5650.19	2203.58				761.388	32.5327	cd	761.388	32.5327	cd	761.3883±32.5327cd			1250.2	11.1433	a	1250.2	11.1433	a	1250.1992±11.1433a													BTR6L	2863.18	2877.67	12.7691
ATR6R1	2588.17	6976.42	2720.8	ATR6R1	2421.94	6550.06	2554.52	ATR6R1	2104.28	5676.5	2213.84				769.188	17.938	cd	769.188	17.938	cd	769.1883±17.938cd			1242.47	13.7458	a	1242.47	13.7458	a	1242.475±13.7458a													BTR6L	2887.31
ATR6R2	2295.72			ATR6R2	2184.61			ATR6R2	1900.72						688.047	20.0461	gh	688.047	20.0461	gh	688.0467±20.0461gh			809.719	9.5014	c	809.719	9.5014	c	809.7194±9.5014c													BTR6L	2882.5
ATR6R2	2365			ATR6R2	2220.61			ATR6R2	1916.28						559.905	20.3015	j	559.905	20.3015	j	559.9046±20.3015j			748.757	8.2696	d	748.757	8.2696	d	748.7567±8.2696d													BTR6S	3019.88	3019.86	2.69347
ATR6R2	2398.06			ATR6R2	2227.83			ATR6R2	1942.67						700.825	18.9657	fgh	700.825	18.9657	fgh	700.8246±18.9657fgh			657.822	21.1178	e	657.822	21.1178	e	657.8217±21.1178e													BTR6S	3022.55
ATR6R3	2030.5			ATR6R3	1876.94			ATR6R3	1633.17						734.153	9.15794	def	734.153	9.1579	def	734.1533±9.1579def			670.446	5.31935	e	670.446	5.3193	e	670.4461±5.3193e													BTR6S	3017.16
ATR6R3	2080.56			ATR6R3	1950.17			ATR6R3	1685.56						676.525	19.7115	h	676.525	19.7115	h	676.5254±19.7115h			740.884	9.30114	d	740.884	9.3011	d	740.8844±9.3011d													ATR4	2486.7	2483.21	4.17803
ATR6R3	2163.72			ATR6R3	1998.67			ATR6R3	1741.44						526.793	20.0009	k	526.793	20.0009	k	526.7925±20.0009k			788.97	7.67615	c	788.97	7.6761	c	788.97±7.6761c													ATR4	2478.58
ATR6LR1	2103.78	7040.94	2745.97	ATR6LR1	1953.39	6520.56	2543.02	ATR6LR1	1706.22	5645.22	2201.64				716.989	9.77348	efg	716.989	9.7735	efg	716.989±9.7735efg			750.157	13.1745	d	750.157	13.1745	d	750.1569±13.1745d													ATR4	2484.33
ATR6LR1	2138.89	7078.28	2760.53	ATR6LR1	1972.39	6556.17	2556.91	ATR6LR1	1717.67	5688.56	2218.54				792.805	10.0378	c	792.805	10.0378	c	792.805±10.0378c			794.43	16.3431	c	794.43	16.3431	c	794.43±16.3431c													ATR6	2200.25	2205.89	7.08124
ATR6LR1	2170.94	7047.44	2748.5	ATR6LR1	2005.5	6523.69	2544.24	ATR6LR1	1733.39	5652.75	2204.57				739.297	9.36963	de	739.297	9.3696	de	739.297±9.3696de			857.09	44.4087	b	857.09	44.4087	b	857.09±44.4087b													ATR6	2203.58
ATR6LR2	2316.83			ATR6LR2	2150			ATR6LR2	1872.17						619.775	5.72186	i	619.775	5.7219	i	619.775±5.7219i			1326.77	22.906	a	1326.77	22.906	a	1326.7692±22.906a													ATR6	2213.84
ATR6LR2	2384.83			ATR6LR2	2195.28			ATR6LR2	1913.22						1250.2	11.1433	a	1250.2	11.1433	a	1250.1992±11.1433a			1292.69	19.7699	b	1292.69	19.7699	b	1292.6875±19.7699b													ATR6L	2201.64	2208.25	9.02983
ATR6LR2	2413.67			ATR6LR2	2217.78			ATR6LR2	1913.72						1242.47	13.7458	a	1242.47	13.7458	a	1242.475±13.7458a			860.022	8.79924	d	860.022	8.7992	d	860.0222±8.7992d													ATR6L	2218.54
ATR6LR3	2459.22			ATR6LR3	2296.39			ATR6LR3	2002.28						559.52	9.70645	cd	559.52	9.7064	cd	559.52±9.7064cd			846.228	4.11612	d	846.228	4.1161	d	846.2278±4.1161d													ATR6L	2204.57
ATR6LR3	2523.5			ATR6LR3	2349.39			ATR6LR3	2025.28						582.433	12.2193	c	582.433	12.2193	c	582.4325±12.2193c			721.211	3.6638	g	721.211	3.6638	g	721.2111±3.6638g													ATR6S	2443.97	2447.01	3.07792
ATR6LR3	2524.11			ATR6LR3	2349.44			ATR6LR3	2041.44						483.632	11.9597	e	483.632	11.9597	e	483.6325±11.9597e			816.205	14.4226	ef	816.205	14.4226	ef	816.205±14.4226ef													ATR6S	2446.95
ATR6SR1	2325.44	7584.03	2957.77	ATR6SR1	2174.81	7189.22	2803.8	ATR6SR1	1890.56	6266.59	2443.97				355.55	9.77484	g	355.55	9.7748	g	355.55±9.7748g			802.418	11.6108	f	802.418	11.6108	f	802.4178±11.6108f													ATR6S	2450.13
ATR6SR1	2362.31	7626.03	2974.15	ATR6SR1	2202.56	7212.69	2812.95	ATR6SR1	1921.81	6274.22	2446.95				501.502	14.1678	e	501.502	14.1678	e	501.5021±14.1678e			852.634	11.5186	d	852.634	11.5186	d	852.6339±11.5186d													BTR4	2622.55	2623.1	9.55028
ATR6SR1	2460.38	7619.69	2971.68	ATR6SR1	2268	7221.28	2816.3	ATR6SR1	1958.06	6282.38	2450.13				549.093	15.9795	d	549.093	15.9795	d	549.0929±15.9795d			837.395	7.8396	de	837.395	7.8396	de	837.395±7.8396de													BTR4	2632.91
ATR6SR2	2399.94			ATR6SR2	2305.12			ATR6SR2	1988.69						484.418	10.2271	e	484.418	10.2271	e	484.4179±10.2271e			858.926	2.0072	d	858.926	2.0072	d	858.9263±2.0072d													BTR4	2613.83
ATR6SR2	2406.19			ATR6SR2	2369.12			ATR6SR2	2058.81						443.387	20.9549	f	443.387	20.9549	f	443.3867±20.9549f			891.272	13.3592	c	891.272	13.3592	c	891.2719±13.3592c													BTR6	2417.23	2420.54	3.79664
ATR6SR2	2432.94			ATR6SR2	2370.44			ATR6SR2	2063.5						653.497	9.68743	b	653.497	9.6874	b	653.497±9.6874b																						BTR6	2419.7
ATR6SR3	2679.25			ATR6SR3	2429.25			ATR6SR3	2066.69						672.932	2.65267	b	672.932	2.6527	b	672.932±2.6527b																						BTR6	2424.68
ATR6SR3	2684.38			ATR6SR3	2559.38			ATR6SR3	2253.19						570.135	23.3644	cd	570.135	23.3644	cd	570.1345±23.3644cd																						BTR6L	2465.93	2484.46	16.3001
ATR6SR3	2795.12			ATR6SR3	2607.62			ATR6SR3	2273.12						433.401	7.5212	f	433.401	7.5212	f	433.4005±7.5212f																						BTR6L	2496.59
BTR4R1	4048.75	8186.83	3192.86	BTR4R1	3848.5	7789.96	3038.08	BTR4R1	3335.58	6724.5	2622.55				1326.77	22.906	a	1326.77	22.906	a	1326.7692±22.906a																						BTR6L	2490.85
BTR4R1	4172.75	8218.21	3205.1	BTR4R1	3988.17	7762.21	3027.26	BTR4R1	3423.17	6751.04	2632.91				1292.69	19.7699	b	1292.69	19.7699	b	1292.6875±19.7699b																						BTR6S	2599.86	2602.74	2.53816
BTR4R1	4182.33	8204.71	3199.84	BTR4R1	3988.5	7803.58	3043.4	BTR4R1	3447.17	6702.12	2613.83				657.085	30.1658	cde	657.085	30.1658	cde	657.085±30.1658cde												20	466.7	500.9								BTR6S	2604.66
BTR4R2	4089.17			BTR4R2	3885.08			BTR4R2	3310.75						663.802	14.6381	cd	663.802	14.6381	cd	663.8017±14.6381cd												13.3	311.1	500.9								BTR6S	2603.69
BTR4R2	4125.75			BTR4R2	3942.33			BTR4R2	3432.58						594.165	19.8937	hi	594.165	19.8937	hi	594.165±19.8937hi												15	350	500.9
BTR4R2	4187			BTR4R2	3997.83			BTR4R2	3467.08						484.954	15.0234	k	484.954	15.0234	k	484.9542±15.0234k												13.3	311.1	500.9
BTR8R1	1986.33	7390.19	2882.17	BTR8R1	1855.96	6916.23	2697.33	BTR8R1	1595.54	5964.15	2326.02				604.868	15.5355	ghi	604.868	15.5355	ghi	604.8683±15.5355ghi
BTR8R1	2126.67	7409.02	2889.52	BTR8R1	1999.83	6923.5	2700.16	BTR8R1	1727.75	5982.81	2333.3				633.755	6.41631	efg	633.755	6.4163	efg	633.7554±6.4163efg
BTR8R1	2128.5	7346.88	2865.28	BTR8R1	2001.04	6882.88	2684.32	BTR8R1	1731.21	5941.08	2317.02				584.058	16.5655	i	584.058	16.5655	i	584.0575±16.5655i
BTR8R2	2058.54			BTR8R2	1929.12			BTR8R2	1671.88						456.495	15.1447	l	456.495	15.1447	l	456.495±15.1447l
BTR8R2	2091.38			BTR8R2	1967.04			BTR8R2	1690.21						619.58	8.091	fgh	619.58	8.091	fgh	619.58±8.091fgh
BTR8R2	2140.54			BTR8R2	2020.67			BTR8R2	1744.08						684.632	11.5166	c	684.632	11.5166	c	684.632±11.5166c
BTR8R3	1808.46			BTR8R3	1705.42			BTR8R3	1464.83						639.548	5.8383	def	639.548	5.8383	def	639.548±5.8383def
BTR8R3	1932.75			BTR8R3	1786.67			BTR8R3	1548.29						537.654	4.37009	j	537.654	4.3701	j	537.654±4.3701j
BTR8R3	1998.62			BTR8R3	1800.58			BTR8R3	1557.38
BTR8R4	1493.54			BTR8R4	1392.38			BTR8R4	1208.83
BTR8R4	1547.33			BTR8R4	1421.17			BTR8R4	1236.62
BTR8R4	1617.71			BTR8R4	1493.42			BTR8R4	1284.96
BTR8LR1	1866.67	7354.88	2868.4	BTR8LR1	1740.83	6846.08	2669.97	BTR8LR1	1505.62	5911.96	2305.66
BTR8LR1	1949.96	7394.35	2883.8	BTR8LR1	1824.92	6887	2685.93	BTR8LR1	1566.79	5946.88	2319.28
BTR8LR1	1956.38	7381.85	2878.92	BTR8LR1	1825.21	6873.48	2680.66	BTR8LR1	1580.42	5943.81	2318.09
BTR8LR2	1981.25			BTR8LR2	1855.38			BTR8LR2	1607.62
BTR8LR2	2021.25			BTR8LR2	1894.62			BTR8LR2	1627.08
BTR8LR2	2023.29			BTR8LR2	1897.33			BTR8LR2	1640.33
BTR8LR3	1802.71			BTR8LR3	1676.96			BTR8LR3	1451
BTR8LR3	1879.62			BTR8LR3	1756.08			BTR8LR3	1507.58
BTR8LR3	1896.67			BTR8LR3	1771			BTR8LR3	1534.17
BTR8LR4	1394.96			BTR8LR4	1298.42			BTR8LR4	1128.58
BTR8LR4	1411.04			BTR8LR4	1352.92			BTR8LR4	1177.67
BTR8LR4	1526.54			BTR8LR4	1400.92			BTR8LR4	1205.25
BTR8SR1	1960.35	7701.55	3003.6	BTR8SR1	1809.5	7307.02	2849.74	BTR8SR1	1566.2	6323.55	2466.18
BTR8SR1	2003.3	7717.52	3009.83	BTR8SR1	1852.5	7321.6	2855.42	BTR8SR1	1592.7	6336.07	2471.07
BTR8SR1	2004.6	7695.82	3001.37	BTR8SR1	1853.3	7287.98	2842.31	BTR8SR1	1607.1	6297.43	2456
BTR8SR2	2121.4			BTR8SR2	2009.6			BTR8SR2	1726.25
BTR8SR2	2130.45			BTR8SR2	2028.4			BTR8SR2	1754.85
BTR8SR2	2141.5			BTR8SR2	2060.5			BTR8SR2	1785.3
BTR8SR3	1932.45			BTR8SR3	1872.55			BTR8SR3	1623.25
BTR8SR3	1976.25			BTR8SR3	1893.85			BTR8SR3	1644.05
BTR8SR3	1995.9			BTR8SR3	1920.5			BTR8SR3	1652.3
BTR8SR4	1649.9			BTR8SR4	1572.35			BTR8SR4	1367.2
BTR8SR4	1671.5			BTR8SR4	1595.8			BTR8SR4	1379
BTR8SR4	1696.65			BTR8SR4	1599.35			BTR8SR4	1389.6
BTR6R1	2627.72	7459.22	2909.1	BTR6R1	2539.67	7179.94	2800.18	BTR6R1	2182.94	6198.03	2417.23
BTR6R1	2706.44	7487.5	2920.12	BTR6R1	2548.89	7171.69	2796.96	BTR6R1	2204.56	6204.36	2419.7
BTR6R1	2715.56	7494.36	2922.8	BTR6R1	2570.5	7202.31	2808.9	BTR6R1	2228.06	6217.14	2424.68
BTR6R2	2582.5			BTR6R2	2491.28			BTR6R2	2160.5
BTR6R2	2599.94			BTR6R2	2521.94			BTR6R2	2167.67
BTR6R2	2624.72			BTR6R2	2524.06			BTR6R2	2181.28
BTR6R3	2224.28			BTR6R3	2124.61			BTR6R3	1840.83
BTR6R3	2231.5			BTR6R3	2140.61			BTR6R3	1847.56
BTR6R3	2251.56			BTR6R3	2147.67			BTR6R3	1859.39
BTR6LR1	2564.06	7841.83	3058.32	BTR6LR1	2397.06	7341.5	2863.18	BTR6LR1	2058.94	6322.89	2465.93
BTR6LR1	2579.44	7903.61	3082.41	BTR6LR1	2411.44	7403.36	2887.31	BTR6LR1	2087.28	6401.5	2496.59
BTR6LR1	2626.22	7879.08	3072.84	BTR6LR1	2459.67	7391.03	2882.5	BTR6LR1	2132.28	6386.81	2490.85
BTR6LR2	2494.83			BTR6LR2	2332			BTR6LR2	2024.33
BTR6LR2	2570.06			BTR6LR2	2404.11			BTR6LR2	2066.17
BTR6LR2	2570.94			BTR6LR2	2404.28			BTR6LR2	2081.94
BTR6LR3	2635.33			BTR6LR3	2490.89			BTR6LR3	2159.06
BTR6LR3	2706.83			BTR6LR3	2540.17			BTR6LR3	2182
BTR6LR3	2730.28			BTR6LR3	2563.61			BTR6LR3	2217.67
BTR6SR1	2575.06	8190.66	3194.36	BTR6SR1	2475.06	7743.28	3019.88	BTR6SR1	2130.69	6666.31	2599.86
BTR6SR1	2625.12	8183.69	3191.64	BTR6SR1	2479.31	7750.12	3022.55	BTR6SR1	2141.25	6678.62	2604.66
BTR6SR1	2627.69	8229.47	3209.49	BTR6SR1	2502.69	7736.31	3017.16	BTR6SR1	2169.56	6676.12	2603.69
BTR6SR2	2725.81			BTR6SR2	2538.31			BTR6SR2	2199.19
BTR6SR2	2731.88			BTR6SR2	2544.38			BTR6SR2	2199.62
BTR6SR2	2759.5			BTR6SR2	2572			BTR6SR2	2208.31
BTR6SR3	2789.5			BTR6SR3	2602			BTR6SR3	2250.75
BTR6SR3	2849.25			BTR6SR3	2661.75			BTR6SR3	2285.94
BTR6SR3	2862.94			BTR6SR3	2675.44			BTR6SR3	2319.25
[truncated: 15 more columns]

## Sheet: Figure2 and Table4
Index		2020																													2021
	Number	7				13				19				25								31									7				13				19				25				31
22TR6R11	37	170	2.44	84	1.51	215	3.71	98	1.35	235	7.87	75	2.91	26	1.04			9	0.31			29	19	22.79		11	11	8.81			186	2.52	80	1.48	196	4.46	91	2.34	231	7.73	96	3.41	246	9.34	82	2.65	470	21.86
			1.10044		1.10044						1.10044		1.10044	18	0.67		234	6	0.18		78	24	20	1.10044		10	9	1.10044				1.10044		1.10044		1.10044		1.10044		1.10044		1.10044
			1.33956		0.40956		3.71		1.35		6.76956		1.80956	20	0.79		8.91	7	0.22		2.53	24	24	21.6896		9	8	7.70956				1.41956		0.37956		3.35956		1.23956		6.62956		2.30956
														29	1.11			13	0.41			19	21			9	8
														17	0.53			5	0.15			22	30			12	11
														22	0.87			5	0.15			24	25			9	13		1.46996
														25	0.92			10	0.35			25	22			11	12
		170	0.00787976	84	0.00487571	215	0.0172558	98	0.0137755	235	0.0288066	75	0.0241275	29	1.21	234	0.0380769	11	0.38	78	0.0324359	24	27	23.25	0.0466442	8	11	9.85	0.0391348		186	0.00763204	80	0.0047445	196	0.0171406	91	0.0136215	231	0.0286994	96	0.0240579	246	0.0379675	82	0.0323171	23.5	0.0465106
														24	0.88			5	0.16			25	19			9	9
														24	0.89			7	0.22			21	21			9	8
Average														234	8.91			78	2.53				465				197
22TR6R12	40	201	2.68	77	1.49	280	4.79	174	2.31	259	8.54	85	3.18	32	1.29			11	0.34			27	24	22.99		12	8	8.63			168	2.37	83	1.51	252	5.38	128	2.78	243	8.05	81	3.07	235	8.91	99	3.21	462	21.6
			1.10044		1.10044						1.10044		1.10044	33	1.32		278	13	0.46		104	26	21	1.10044		13	5	1.10044				1.10044		1.10044		1.10044		1.10044		1.10044		1.10044
			1.57956		0.38956		4.79		2.31		7.43956		2.07956	25	0.95		10.56	8	0.25		3.39	24	25	21.8896		15	12	7.52956				1.26956		0.40956		4.27956		1.67956		6.94956		1.96956
														23	0.86			5	0.17			22	24			8	9
														27	1.01			13	0.46			22	28			12	8
														25	0.87			7	0.21			22	22			9	7		1.47096
														26	0.94			9	0.29			19	19			14	4
		201	0.00785851	77	0.00505922	280	0.0171071	174	0.0132759	259	0.0287242	85	0.0244654	33	1.34	278	0.0379856	18	0.58	104	0.0325962	25	24	23.35	0.0468727	6	13	9.5	0.0396293		168	0.0075569	83	0.00493446	252	0.0169824	128	0.0131216	243	0.028599	81	0.0243156	235	0.0379149	99	0.0324242	23.1	0.0467532
														28	1.09			12	0.38			24	24			12	6
														26	0.89			8	0.25			25	20			8	9
Average														278	10.56			104	3.39				467				190
22TR6R13	43	150	2.29	73	1.47	244	4.16	149	2.01	206	7.01	75	2.91	27	0.95			10	0.32			24	26	22.89		17	18	8.68			195	2.61	88	1.53	198	4.45	139	2.96	228	7.61	83	3.09	275	10.49	83	2.69	465	21.64
			1.10044		1.10044						1.10044		1.10044	29	1.11		297	10	0.33		101	25	21	1.10044		11	4	1.10044				1.10044		1.10044		1.10044		1.10044		1.10044		1.10044
			1.18956		0.36956		4.16		2.01		5.90956		1.80956	34	1.34		11.37	11	0.37		3.29	19	24	21.7896		8	5	7.57956				1.50956		0.42956		3.34956		1.85956		6.50956		1.98956
														25	0.88			6	0.19			23	19			8	4
														31	1.27			11	0.32			24	24			5	15
														25	0.88			8	0.25			24	21			7	14		1.46846
														30	1.21			9	0.28			24	19			12	9
		150	0.0079304	73	0.00506247	244	0.0170492	149	0.0134899	206	0.0286872	75	0.0241275	34	1.36	297	0.0382828	13	0.44	101	0.0325743	27	24	23.35	0.0466586	13	11	9.9	0.0382806		195	0.00774133	88	0.00488136	198	0.016917	139	0.0133781	228	0.0285507	83	0.0239706	275	0.0381455	83	0.0324096	23.25	0.0465376
														26	0.96			9	0.3			23	28			5	9
														36	1.41			14	0.49			24	24			15	8
Average			0.00788956		0.00499913		0.0171374		0.0135138		0.0287393		0.0242401	297	11.37		0.0381151	101	3.29		0.0325354		467	23.3167	0.0467252		198	9.75	0.0390149			0.00764343		0.00485344		0.0170133		0.0133737		0.0286164		0.0241147		0.0380093		0.0323837	23.2833	0.0466005
22TR6R21	38	210	2.76	88	1.56	175	2.98	130	1.72	195	6.67	42	2.11	26	1.02			6	0.2			24	22	21.51		8	9	7.86			265	3.14	87	1.54	217	4.77	124	2.73	193	6.59	76	2.92	206	7.62	83	2.63	455	20.53
			1.10044		1.10044						1.10044		1.10044	19	0.61		233	3	0.11		65	22	26	1.10044		8	8	1.10044				1.10044		1.10044		1.10044		1.10044		1.10044		1.10044
			1.65956		0.45956		2.98		1.72		5.56956		1.00956	19	0.61		8.65	7	0.21		2.07	26	21	20.4096		12	9	6.75956				2.03956		0.43956		3.66956		1.62956		5.48956		1.81956
														27	1.18			8	0.24			21	19			5	14
														28	1.02			13	0.39			26	27			7	10
														23	0.71			4	0.12			22	22			7	11		1.35846
														27	1.18			11	0.36			21	20			9	8
		210	0.00790267	88	0.00522227	175	0.0170286	130	0.0132308	195	0.0285618	42	0.0240371	18	0.59	233	0.0371245	1	0.03	65	0.0318462	28	20	22.55	0.045254	13	8	8.9	0.0379751		265	0.00769645	87	0.00505241	217	0.0169104	124	0.0131416	193	0.0284433	76	0.0239416	206	0.0369903	83	0.0316867	22.75	0.0451209
														20	0.65			6	0.19			20	21			10	8
														26	1.08			6	0.22			21	22			8	6
Average														233	8.65			65	2.07				451				178
22TR6R22	41	200	2.66	74	1.47	265	4.54	114	1.53	241	8.03	84	3.11	25	0.97			15	0.47			19	23	21.85		13	8	7.55			223	2.79	76	1.47	263	5.57	115	2.63	226	7.57	73	2.84	254	9.39	105	3.35	451	20.24
			1.10044		1.10044						1.10044		1.10044	29	1.11		262	8	0.24		116	21	23	1.10044		10	8	1.10044				1.10044		1.10044		1.10044		1.10044		1.10044		1.10044
			1.55956		0.36956		4.54		1.53		6.92956		2.00956	29	1.12		9.72	10	0.32		3.71	23	22	20.7496		9	8	6.44956				1.68956		0.36956		4.46956		1.52956		6.46956		1.73956
														27	1.09			13	0.44			22	23			10	6
														25	0.86			9	0.27			28	24			7	7
														28	0.98			17	0.52			21	25			4	15		1.35996
														33	1.28			19	0.66			21	23			10	8
		200	0.0077978	74	0.00499405	265	0.0171321	114	0.0134211	241	0.0287534	84	0.0239233	22	0.77	262	0.0370992	8	0.26	116	0.0319828	23	22	23.05	0.0450099	9	6	8.6	0.0374974		223	0.0075765	76	0.00486263	263	0.0169945	115	0.0133005	226	0.0286264	73	0.0238296	254	0.0369685	105	0.0319048	22.55	0.044878
														20	0.72			7	0.21			26	22			13	6
														24	0.82			10	0.32			27	23			7	8
Average														262	9.72			116	3.71				461				172
22TR6R23	44	181	2.55	109	1.65	195	3.31	88	1.21	252	8.34	98	3.47	27	1.06			9	0.28			22	22	21.78		9	9	7.25			187	2.56	89	1.54	214	4.71	96	2.41	226	7.57	87	3.19	253	9.43	89	2.77	445	20.17
			1.10044		1.10044						1.10044		1.10044	25	0.83		253	7	0.21		70	20	21	1.10044		9	8	1.10044				1.10044		1.10044		1.10044		1.10044		1.10044		1.10044
			1.44956		0.54956		3.31		1.21		7.23956		2.36956	27	1.05		9.46	9	0.28		2.19	24	24	20.6796		8	6	6.14956				1.45956		0.43956		3.60956		1.30956		6.46956		2.08956
														26	0.98			5	0.15			25	22			8	7
														31	1.22			9	0.29			24	21			7	9
														17	0.61			4	0.12			24	25			9	8		1.34146
														26	0.95			8	0.25			22	24			9	8
		181	0.00800862	109	0.00504183	195	0.0169744	88	0.01375	252	0.0287284	98	0.0241792	22	0.81	253	0.0373913	4	0.13	70	0.0312857	23	19	22.75	0.0454496	9	7	8.15	0.0377274		187	0.00780513	89	0.00493888	214	0.0168671	96	0.0136413	226	0.0286264	87	0.0240179	253	0.0372727	89	0.0311236	22.25	0.0453258
														26	0.97			9	0.31			21	19			11	6
														26	0.98			6	0.17			21	32			8	8
Average			0.00790303		0.00508605		0.017045		0.0134673		0.0286812		0.0240466	253	9.46		0.037205	70	2.19		0.0317049		455	22.7833	0.0452378		163	8.55	0.0377333			0.0076927		0.00495131		0.016924		0.0133611		0.0285654		0.0239297		0.0370772		0.0315717	22.5167	0.0451083
22TR6R31	39	215	2.87	75	1.53	223	3.84	127	1.73	179	6.06	35	1.89	23	0.72			7	0.21			21	28	19.57		9	8	6.22			236	2.99	101	1.67	237	5.15	108	2.56	186	6.23	82	2.94	247	8.88	86	2.51	428	18.33
			1.10044		1.10044						1.10044		1.10044	29	1.08		249	9	0.27		78	21	22	1.10044		8	5	1.10044				1.10044		1.10044		1.10044		1.10044		1.10044		1.10044
			1.76956		0.42956		3.84		1.73		4.95956		0.78956	24	0.86		8.98	9	0.26		2.28	24	25	18.4696		9	8	5.11956				1.88956		0.56956		4.04956		1.45956		5.12956		1.83956
														23	0.75			4	0.12			18	19			6	5
														28	1.05			9	0.28			19	24			7	11
														27	0.93			12	0.31			26	11			4	9		1.17946
														20	0.84			6	0.17			16	20			5	3
		215	0.00823051	75	0.00572747	223	0.0172197	127	0.013622	179	0.027707	35	0.0225589	29	1.12	249	0.0360643	10	0.31	78	0.0292308	22	24	21.5	0.0429525	10	8	7.65	0.0334612		236	0.00800661	101	0.00563921	237	0.0170868	108	0.0135144	186	0.0275783	82	0.0224337	247	0.0359514	86	0.029186	21.4	0.0428271
														21	0.79			5	0.14			26	25			8	10
														25	0.84			7	0.21			21	18			9	11
Average														249	8.98			78	2.28				430				153
22TR6R32	42	193	2.7	84	1.57	188	3.26	51	0.71	171	5.84	43	2.06	22	0.81			4	0.12			22	23	19.74		13	6	6.06			191	2.65	86	1.57	198	4.51	86	2.29	196	6.51	84	2.96	227	8.19	92	2.71	437	18.54
			1.10044		1.10044						1.10044		1.10044	24	0.89		242	5	0.14		79	21	21	1.10044		8	6	1.10044				1.10044		1.10044		1.10044		1.10044		1.10044		1.10044
			1.59956		0.46956		3.26		0.71		4.73956		0.95956	30	1.16		8.76	9	0.27		2.33	23	25	18.6396		6	9	4.95956				1.54956		0.46956		3.40956		1.18956		5.40956		1.85956
														19	0.67			2	0.06			22	21			14	5
														24	0.84			7	0.21			21	22			9	7
														24	0.85			9	0.26			22	20			7	4		1.17996
														30	1.11			15	0.45			21	22			9	5
		193	0.00828788	84	0.00559	188	0.0173404	51	0.0139216	171	0.0277167	43	0.0223153	23	0.82	242	0.0361983	7	0.21	79	0.0294937	21	23	21.9	0.0425561	8	7	7.35	0.0337385		191	0.00811288	86	0.00546	198	0.01722	86	0.0138321	196	0.0275998	84	0.0221376	227	0.0360793	92	0.0294565	21.85	0.0424256
														25	0.89			15	0.44			25	21			8	5
														21	0.72			6	0.17			22	20			5	6
Average														242	8.76			79	2.33				438				147
22TR6R33	45	177	2.59	86	1.59	222	3.83	70	0.92	183	6.16	60	2.44	23	0.88			8	0.23			26	23	19.89		7	4	5.89			196	2.71	96	1.63	230	5.04	92	2.3	204	6.72	69	2.63	199	7.24	87	2.53	419	17.96
			1.10044		1.10044						1.10044		1.10044	18	0.61		202	5	0.15		49	26	22	1.10044		5	14	1.10044				1.10044		1.10044		1.10044		1.10044		1.10044		1.10044
			1.48956		0.48956		3.83		0.92		5.05956		1.33956	21	0.72		7.37	4	0.11		1.43	21	19	18.7896		4	4	4.78956				1.60956		0.52956		3.93956		1.19956		5.61956		1.52956
														21	0.72			5	0.15			20	24			6	8
														17	0.65			5	0.15			24	23			6	7
														14	0.52			3	0.08			21	22			4	5		1.17896
														21	0.83			5	0.15			20	18			9	15
		177	0.00841559	86	0.00569256	222	0.0172523	70	0.0131429	183	0.0276479	60	0.022326	21	0.83	202	0.0364851	5	0.15	49	0.0291837	20	22	21.85	0.0429967	7	7	7.15	0.0334934		196	0.00821204	96	0.00551625	230	0.0171285	92	0.0130387	204	0.0275469	69	0.0221675	199	0.0363819	87	0.0290805	20.95	0.042864
														26	0.92			5	0.15			19	21			7	6
														20	0.69			4	0.11			25	21			12	6
Average			0.00831133		0.00567001		0.0172708		0.0135622		0.0276905		0.0224001	202	7.37		0.0362493	49	1.43		0.0293027		437	21.75	0.0428351		143	7.38333	0.0335644			0.00811051		0.00553849		0.0171451		0.0134617		0.027575		0.0222463		0.0361375		0.029241	21.4	0.0427056
22TR6LR11	46	212	2.79	111	1.67	222	3.68	92	1.11	264	8.53	126	4.03	21	0.75			10	0.32			21	22	22.07		9	9	7.87			187	2.55	81	1.51	217	4.67	93	2.21	264	8.49	95	3.3	215	7.95	92	2.88	452	20.78
			1.10044		1.10044						1.10044		1.10044	24	0.93		217	14	0.45		93	22	22	1.10044		10	10	1.10044				1.10044		1.10044		1.10044		1.10044		1.10044		1.10044
			1.68956		0.56956		3.68		1.11		7.42956		2.92956	24	0.93		8.05	12	0.36		2.92	21	22	20.9696		9	8	6.76956				1.44956		0.40956		3.56956		1.10956		7.38956		2.19956
														21	0.74			8	0.25			24	25			8	9
														20	0.81			9	0.28			22	26			9	13
														20	0.81			8	0.27			24	21			8	8		1.38696
														18	0.63			6	0.19			19	24			9	8
		212	0.00796962	111	0.00513117	222	0.0165766	92	0.0120652	264	0.0281423	126	0.0232505	19	0.64	217	0.0370968	10	0.3	93	0.0313978	25	26	22.75	0.0460869	8	11	9	0.0376087		187	0.00775166	81	0.0050563	217	0.0164496	93	0.0119308	264	0.0279908	95	0.0231533	215	0.0369767	92	0.0313043	22.6	0.0459735
														26	0.96			6	0.18			22	28			6	9
														24	0.85			10	0.32			20	19			11	8
Average														217	8.05			93	2.92				455				180
22TR6LR12	49	206	2.75	67	1.44	181	3.03	114	1.41	212	7.09	81	2.98	29	1.11			6	0.19			24	21	21.92		9	8	7.89			182	2.51	69	1.44	193	4.31	97	2.29	234	7.68	78	2.9	237	8.74	93	2.93	441	20.44
			1.10044		1.10044						1.10044		1.10044	28	1.07		264	12	0.39		113	22	21	1.10044		8	6	1.10044				1.10044		1.10044		1.10044		1.10044		1.10044		1.10044
			1.64956		0.33956		3.03		1.41		5.98956		1.87956	25	0.91		9.77	9	0.29		3.57	25	20	20.8196		8	13	6.78956				1.40956		0.33956		3.20956		1.18956		6.57956		1.79956
														30	1.16			15	0.48			24	24			11	7
														24	0.83			16	0.53			23	21			9	8
														31	1.19			9	0.28			21	23			9	12		1.38046
														28	1.05			10	0.32			20	24			7	12
		206	0.00800757	67	0.00506806	181	0.0167403	114	0.0123684	212	0.0282526	81	0.0232044	23	0.81	264	0.0370076	6	0.19	113	0.0315929	25	21	22.4	0.0464722	8	9	8.75	0.0387975		182	0.00774484	69	0.00492116	193	0.0166298	97	0.0122635	234	0.0281178	78	0.0230713	237	0.0368776	93	0.0315054	22.05	0.0463492
														25	0.92			15	0.46			24	20			8	8
														21	0.72			15	0.44			23	22			8	7
Average														264	9.77			113	3.57				448				175
22TR6LR13	52	180	2.51	52	1.36	189	3.19	112	1.36	236	7.81	85	3.07	23	0.86			13	0.41			26	17	22.15		8	7	7.76			185	2.51	78	1.48	199	4.44	114	2.47	241	7.92	85	3.06	225	8.31	94	2.96	449	20.63
			1.10044		1.10044						1.10044		1.10044	23	0.86		229	11	0.36		97	27	20	1.10044		12	9	1.10044				1.10044		1.10044		1.10044		1.10044		1.10044		1.10044
			1.40956		0.25956		3.19		1.36		6.70956		1.96956	25	0.94		8.49	10	0.38		3.07	27	27	21.0496		8	8	6.65956				1.40956		0.37956		3.33956		1.36956		6.81956		1.95956
														24	0.87			7	0.22			22	23			9	10
														18	0.64			6	0.16			22	20			12	7
														22	0.83			12	0.38			20	22			13	7		1.38546
														22	0.83			8	0.24			22	22			7	9
		180	0.00783089	52	0.00499154	189	0.0168783	112	0.0121429	236	0.0284303	85	0.0231713	25	0.96	229	0.0370742	9	0.33	97	0.0316495	27	25	22.85	0.0460603	8	10	8.7	0.0382733		185	0.00761924	78	0.00486615	199	0.0167817	114	0.0120137	241	0.0282969	85	0.0230536	225	0.0369333	94	0.0314894	22.45	0.0459465
														23	0.84			7	0.17			24	20			6	9
														24	0.86			14	0.42			20	24			8	7
Average			0.00793603		0.00506359		0.0167317		0.0121922		0.0282751		0.0232087	229	8.49		0.0370595	97	3.07		0.0315468		457	22.6667	0.0462065		174	8.81667	0.0382265			0.00770525		0.00494787		0.0166204		0.0120693		0.0281352		0.0230927		0.0369292		0.031433	22.3667	0.0460897
22TR6LR21	47	237	3.04	111	1.65	208	3.61	143	2.09	242	8.04	90	3.34	25	0.99			11	0.35			20	11	22.38		7	6	7.85			236	2.99	82	1.51	224	4.96	151	3.29	236	7.84	84	3.18	225	8.57	97	3.15	441	20.89
			1.10044		1.10044						1.10044		1.10044	25	0.97		252	7	0.22		103	31	26	1.10044		10	9	1.10044				1.10044		1.10044		1.10044		1.10044		1.10044		1.10044
			1.93956		0.54956		3.61		2.09		6.93956		2.23956	24	0.95		9.63	8	0.24		3.36	15	20	21.2796		8	8	6.74956				1.88956		0.40956		3.85956		2.18956		6.73956		2.07956
														24	0.94			10	0.32			22	22			8	13
														28	1.08			16	0.55			21	20			11	5
														22	0.79			6	0.18			24	22			6	13		1.40146
														26	1.02			13	0.43			22	24			8	11
		237	0.0081838	111	0.00495099	208	0.0173558	143	0.0146154	242	0.0286759	90	0.024884	27	1.06	252	0.0382143	10	0.32	103	0.0326214	24	28	22.4	0.047499	5	6	8.35	0.0404165		236	0.00800661	82	0.00499463	224	0.0172302	151	0.0145004	236	0.0285575	84	0.0247567	225	0.0380889	97	0.0324742	22.05	0.0473696
														26	0.94			8	0.26			19	22			8	8
														25	0.89			14	0.49			28	27			8	9
Average														252	9.63			103	3.36				448				167
22TR6LR22	50	261	3.21	128	1.77	205	3.57	142	1.99	277	9.08	120	4.07	26	1.01			9	0.29			24	27	22.31		7	6	8.01			196	2.65	89	1.56	267	5.72	106	2.57	259	8.53	102	3.61	243	9.27	82	2.68	451	21.39
			1.10044		1.10044						1.10044		1.10044	22	0.79		253	7	0.23		87	21	22	1.10044		13	9	1.10044				1.10044		1.10044		1.10044		1.10044		1.10044		1.10044
			2.10956		0.66956		3.57		1.99		7.97956		2.96956	31	1.25		9.68	12	0.42		2.85	24	19	21.2096		5	6	6.90956				1.54956		0.45956		4.61956		1.46956		7.42956		2.50956
														31	1.26			12	0.42			24	25			8	8
														19	0.72			8	0.26			21	25			12	10
														25	0.98			9	0.31			22	20			8	8		1.40596
														25	0.99			7	0.16			25	22			9	12
		261	0.00808261	128	0.00523094	205	0.0174146	142	0.0140141	277	0.0288071	120	0.0247463	29	0.99	253	0.0382609	11	0.35	87	0.0327586	20	22	22.3	0.0475551	12	9	8.55	0.0404068		196	0.00790592	89	0.0051636	267	0.0173017	106	0.0138638	259	0.0286856	102	0.0246035	243	0.0381481	82	0.0326829	22.55	0.0474279
														19	0.66			3	0.09			22	23			8	7
														26	1.03			9	0.32			22	16			10	4
Average														253	9.68			87	2.85				446				171
22TR6LR23	53	208	2.72	87	1.54	236	4.13	111	1.55	260	8.54	75	2.96	21	0.75			6	0.19			22	22	22.31		10	11	7.96			189	2.54	91	1.55	237	5.22	107	2.58	258	8.45	86	3.22	231	8.84	79	2.53	447	20.92
			1.10044		1.10044						1.10044		1.10044	19	0.68		222	8	0.25		73	24	25	1.10044		7	10	1.10044				1.10044		1.10044		1.10044		1.10044		1.10044		1.10044
			1.61956		0.43956		4.13		1.55		7.43956		1.85956	18	0.66		8.52	4	0.13		2.35	21	21	21.2096		8	8	6.85956				1.43956		0.44956		4.11956		1.47956		7.34956		2.11956
														27	1.16			8	0.24			25	22			8	10
														28	1.19			12	0.41			22	22			6	12
														20	0.69			6	0.19			20	23			8	6		1.40346
														24	0.98			11	0.36			22	19			12	8
		208	0.00778635	87	0.00505241	236	0.0175	111	0.013964	260	0.0286137	75	0.0247941	20	0.69	222	0.0383784	5	0.17	73	0.0321918	19	24	22.6	0.0469238	9	7	8.6	0.0398812		189	0.00761672	91	0.00494022	237	0.0173821	107	0.0138277	258	0.0284867	86	0.024646	231	0.0382684	79	0.0320253	22.35	0.0468009
														21	0.74			6	0.19			26	25			4	12
														24	0.98			7	0.22			22	26			8	8
Average			0.00801758		0.00507811		0.0174235		0.0141978		0.0286989		0.0248082	222	8.52		0.0382845	73	2.35		0.0325239		452	22.4333	0.047326		172	8.5	0.0402348			0.00784308		0.00503282		0.0173047		0.0140639		0.0285766		0.0246687		0.0381685		0.0323942	22.3167	0.0471995
22TR6LR31	48	196	2.81	110	1.73	222	3.91	68	0.99	290	9.67	127	4.27	31	1.31			7	0.24			33	27	23.06		14	9	8.85			183	2.65	98	1.65	231	5.14	98	2.52	231	7.9	97	3.51	252	9.89	86	2.91	469	21.53
			1.10044		1.10044						1.10044		1.10044	29	1.26		233	9	0.32		59	23	22	1.10044		16	10	1.10044				1.10044		1.10044		1.10044		1.10044		1.10044		1.10044
			1.70956		0.62956		3.91		0.99		8.56956		3.16956	25	1.09		9.17	8	0.28		2	27	29	21.9596		11	9	7.74956				1.54956		0.54956		4.03956		1.41956		6.79956		2.40956
														30	1.29			15	0.51			24	24			8	10
														17	0.54			1	0.03			32	28			9	8
														23	0.91			8	0.26			21	21			14	7		1.48546
														21	0.73			5	0.16			24	23			9	10
		196	0.00872224	110	0.00572327	222	0.0176126	68	0.0145588	290	0.0295502	127	0.0249572	17	0.61	233	0.0393562	2	0.06	59	0.0338983	24	19	23.85	0.0460368	9	9	9.95	0.0389425		183	0.00846754	98	0.00560776	231	0.0174873	98	0.0144853	231	0.0294353	97	0.0248408	252	0.039246	86	0.0338372	23.45	0.0459062
														18	0.57			1	0.03			20	22			10	9
														22	0.86			3	0.11			19	15			9	9
Average														233	9.17			59	2				477				199
22TR6LR32	51	180	2.65	84	1.59	204	3.59	83	1.19	214	7.41	48	2.3	27	1.19			6	0.21			28	30	23.14		9	11	8.77			214	2.9	87	1.61	209	4.75	92	2.41	212	7.33	83	3.16	219	8.57	81	2.71	464	21.61
			1.10044		1.10044						1.10044		1.10044	21	0.77		229	4	0.13		45	26	16	1.10044		11	9	1.10044				1.10044		1.10044		1.10044		1.10044		1.10044		1.10044
			1.54956		0.48956		3.59		1.19		6.30956		1.19956	27	1.19		8.99	8	0.32		1.51	25	24	22.0396		13	10	7.66956				1.79956		0.50956		3.64956		1.30956		6.22956		2.05956
														23	0.89			1	0.04			25	20			12	10
														21	0.74			6	0.2			22	20			10	9
														18	0.64			1	0.06			22	20			10	10		1.48546
														20	0.72			2	0.07			24	28			8	9
		180	0.00860867	84	0.0058281	204	0.017598	83	0.0143373	214	0.0294839	48	0.0249908	21	0.78	229	0.0392576	3	0.07	45	0.0335556	27	24	23.6	0.046694	11	9	10.05	0.038157		214	0.00840916	87	0.00585701	209	0.017462	92	0.0142343	212	0.0293847	83	0.024814	219	0.0391324	81	0.0334568	23.2	0.0465733
														22	0.81			2	0.06			27	22			8	11
														29	1.26			12	0.35			20	22			9	12
Average														229	8.99			45	1.51				472				201
22TR6LR33	54	241	3.16	119	1.78	192	3.35	133	1.91	218	7.59	61	2.62	23	0.83			4	0.15			14	26	23.53		9	14	8.46			208	2.84	107	1.7	210	4.74	107	2.62	241	8.25	81	3.11	239	9.38	79	2.62	482	22.28
			1.10044		1.10044						1.10044		1.10044	23	0.82		258	5	0.17		55	31	24	1.10044		10	9	1.10044				1.10044		1.10044		1.10044		1.10044		1.10044		1.10044
			2.05956		0.67956		3.35		1.91		6.48956		1.51956	27	1.16		10.16	7	0.22		1.83	25	31	22.4296		10	11	7.35956				1.73956		0.59956		3.63956		1.51956		7.14956		2.00956
														25	0.93			5	0.19			23	27			9	8
														31	1.31			9	0.3			27	22			10	11
														29	1.21			8	0.26			25	24			9	9		1.48946
														22	0.79			4	0.13			21	19			8	10
		241	0.00854589	119	0.00571059	192	0.0174479	133	0.0143609	218	0.0297686	61	0.0249108	24	0.88	258	0.0393798	3	0.1	55	0.0332727	28	31	24.2	0.0463421	9	10	9.75	0.0377413		208	0.00836327	107	0.00560336	210	0.0173312	107	0.0142015	241	0.0296662	81	0.0248094	239	0.0392469	79	0.0331646	24.1	0.0462241
														29	1.22			8	0.28			21	26			9	9
														25	1.01			2	0.03			20	19			12	9
Average			0.0086256		0.00575399		0.0175529		0.014419		0.0296009		0.0249529	258	10.16		0.0393312	55	1.83		0.0335755		484	23.8833	0.0463576		195	9.91667	0.0382803			0.00841332		0.00568938		0.0174268		0.014307		0.0294954		0.0248214		0.0392084		0.0334862	23.5833	0.0462345
22TR6SR11	55	177	2.49	88	1.54	205	3.44	87	1.05	234	7.71	101	3.43	27	1.02			16	0.52			18	24	21.88		7	9	7.82			192	2.55	99	1.58	258	5.4	99	2.28	228	7.51	98	3.35	209	7.74	82	2.56	441	20.45
			1.10044		1.10044						1.10044		1.10044	24	0.98		206	9	0.28		87	21	18	1.10044		11	8	1.10044				1.10044		1.10044		1.10044		1.10044		1.10044		1.10044
			1.38956		0.43956		3.44		1.05		6.60956		2.32956	15	0.51		7.65	15	0.48		2.73	24	25	20.7796		8	12	6.71956				1.44956		0.47956		4.29956		1.17956		6.40956		2.24956
														16	0.52			5	0.15			27	19			7	9
														21	0.86			6	0.18			21	22			9	10
														16	0.55			6	0.19			23	27			9	13		1.37496
														24	0.83			9	0.27			26	26			8	10
		177	0.00785062	88	0.004995	205	0.0167805	87	0.012069	234	0.028246	101	0.023065	19	0.71	206	0.0371359	6	0.18	87	0.0313793	23	23	22.35	0.0464867	6	9	8.85	0.0379636		192	0.00754979	99	0.00484404	258	0.016665	99	0.0119147	228	0.0281121	98	0.0229547	209	0.0370335	82	0.0312195	22.05	0.0463719
														23	0.91			8	0.25			20	20			7	8
														21	0.76			7	0.23			21	19			9	8
Average														206	7.65			87	2.73				447				177
22TR6SR12	58	171	2.49	85	1.52	220	3.69	123	1.54	290	9.24	137	4.28	31	1.26			16	0.51			26	22	22.06		7	5	7.84			189	2.61	79	1.48	224	4.83	104	2.39	224	7.36	134	4.19	264	9.85	106	3.35	457	21.04
			1.10044		1.10044						1.10044		1.10044	30	1.18		274	21	0.66		157	23	23	1.10044		12	11	1.10044				1.10044		1.10044		1.10044		1.10044		1.10044		1.10044
			1.38956		0.41956		3.69		1.54		8.13956		3.17956	29	1.21		10.26	20	0.64		4.98	18	25	20.9596		13	8	6.73956				1.50956		0.37956		3.72956		1.28956		6.25956		3.08956
														23	0.8			9	0.28			25	21			11	8
														24	0.84			15	0.47			26	21			10	11
														31	1.21			20	0.62			21	27			11	7		1.38496
														25	0.85			10	0.33			24	16			8	7
		171	0.00812608	85	0.004936	220	0.0167727	123	0.0125203	290	0.0280674	137	0.0232085	24	0.84	274	0.0374453	13	0.41	157	0.0317197	26	25	22.7	0.0461664	8	9	9	0.037442		189	0.00798709	79	0.00480456	224	0.0166498	104	0.0123996	224	0.0279445	134	0.0230564	264	0.0373106	106	0.0316038	22.85	0.0460394
														26	0.88			13	0.43			22	18			8	9
														31	1.19			20	0.63			24	21			7	10
Average														274	10.26			157	4.98				454				180
22TR6SR13	61	159	2.37	64	1.43	250	4.18	98	1.17	230	7.57	103	3.47	30	1.16			14	0.43			27	27	22.23		12	8	7.59			200	2.65	86	1.53	234	4.98	93	2.22	241	7.85	96	3.31	251	9.29	83	2.62	442	20.16
			1.10044		1.10044						1.10044		1.10044	31	1.21		251	17	0.59		102	27	14	1.10044		8	8	1.10044				1.10044		1.10044		1.10044		1.10044		1.10044		1.10044
			1.26956		0.32956		4.18		1.17		6.46956		2.36956	26	0.98		9.32	12	0.38		3.23	27	25	21.1296		10	8	6.48956				1.54956		0.42956		3.87956		1.11956		6.74956		2.20956
														22	0.78			5	0.15			20	26			7	10
														30	1.16			6	0.18			20	23			9	9
														26	0.93			11	0.35			24	20			7	8		1.38096
														24	0.84			11	0.36			22	19			12	11
		159	0.00798465	64	0.00514938	250	0.01672	98	0.0119388	230	0.0281285	103	0.0230054	17	0.59	251	0.0371315	4	0.12	102	0.0316667	25	20	23.1	0.045735	7	8	8.7	0.0372963		200	0.0077478	86	0.00499488	234	0.0165793	93	0.0120383	241	0.0280065	96	0.0230162	251	0.037012	83	0.0315663	22.1	0.0456109
														17	0.59			8	0.24			27	24			8	10
														28	1.08			14	0.43			24	21			7	7
Average			0.00798712		0.00502679		0.0167577		0.012176		0.0281473		0.023093	251	9.32		0.0372376	102	3.23		0.0315886		462	22.7167	0.0461294		174	8.85	0.0375673			0.00776156		0.00488116		0.0166314		0.0121175		0.028021		0.0230091		0.0371187		0.0314632	22.3333	0.0460074
22TR6SR21	56	212	2.79	78	1.49	232	4.05	122	1.73	213	7.22	101	3.58	23	0.91			6	0.19			19	17	21.85		5	9	8.01			189	2.56	86	1.52	227	5.04	103	2.55	211	7.14	98	3.49	228	8.75	86	2.81	449	20.79
			1.10044		1.10044						1.10044		1.10044	22	0.88		238	5	0.15		75	22	22	1.10044		9	11	1.10044				1.10044		1.10044		1.10044		1.10044		1.10044		1.10044
			1.68956		0.38956		4.05		1.73		6.11956		2.47956	26	0.99		9.16	10	0.33		2.46	27	17	20.7496		10	10	6.90956				1.45956		0.41956		3.93956		1.44956		6.03956		2.38956
														26	0.98			14	0.48			20	20			5	6
														22	0.81			6	0.18			22	22			9	10
														27	1.16			10	0.34			28	26			9	8		1.38296
														19	0.68			6	0.19			18	24			8	9
		212	0.00796962	78	0.00499436	232	0.0174569	122	0.0141803	213	0.0287303	101	0.0245501	26	1.07	238	0.0384874	8	0.25	75	0.0328	24	22	22.35	0.0464196	9	10	8.7	0.0397101		189	0.00772254	86	0.0048786	227	0.0173549	103	0.0140734	211	0.0286235	98	0.0243833	228	0.0383772	86	0.0326744	22.45	0.0463029
														21	0.77			4	0.12			23	24			9	10
														26	0.91			6	0.23			28	22			9	9
Average														238	9.16			75	2.46				447				174
22TR6SR22	59	164	2.42	84	1.52	247	4.32	157	2.22	261	8.49	79	3.03	23	0.83			8	0.26			25	19	22.05		8	6	8.09			168	2.42	87	1.52	234	5.16	107	2.61	224	7.41	84	3.14	231	8.81	81	2.61	454	20.76
			1.10044		1.10044						1.10044		1.10044	24	0.93		230	7	0.22		92	21	24	1.10044		7	9	1.10044				1.10044		1.10044		1.10044		1.10044		1.10044		1.10044
			1.31956		0.41956		4.32		2.22		7.38956		1.92956	23	0.92		8.79	4	0.12		2.97	25	19	20.9496		11	9	6.98956				1.31956		0.41956		4.05956		1.50956		6.30956		2.03956
														22	0.84			8	0.26			26	27			9	11
														18	0.61			7	0.22			20	20			9	8
														28	1.18			19	0.62			21	20			9	10		1.39696
														22	0.73			14	0.44			21	24			7	6
		164	0.0080461	84	0.00499476	247	0.0174899	157	0.0141401	261	0.0283125	79	0.0244248	23	0.83	230	0.0382174	6	0.19	92	0.0322826	20	26	22.85	0.0458415	9	12	8.95	0.0390478		168	0.00785452	87	0.00482253	234	0.0173485	107	0.014108	224	0.0281677	84	0.0242805	231	0.0381385	81	0.0322222	22.7	0.0457269
														25	1.05			11	0.35			22	24			9	10
														22	0.87			8	0.29			26	27			11	9
Average														230	8.79			92	2.97				457				179
22TR6SR23	62	163	2.38	63	1.42	235	4.09	82	1.17	237	7.78	67	2.73	26	1.09			12	0.39			25	20	22.21		6	8	7.86			174	2.43	81	1.51	246	5.35	89	2.36	235	7.69	86	3.18	251	9.61	96	3.08	446	20.59
			1.10044		1.10044						1.10044		1.10044	25	0.97		250	8	0.25		96	23	19	1.10044		7	12	1.10044				1.10044		1.10044		1.10044		1.10044		1.10044		1.10044
			1.27956		0.31956		4.09		1.17		6.67956		1.62956	19	0.63		9.6	7	0.22		3.09	26	22	21.1096		6	8	6.75956				1.32956		0.40956		4.24956		1.25956		6.58956		2.07956
														25	0.97			9	0.31			22	25			13	9
														32	1.24			19	0.59			22	23			6	7
														23	0.79			9	0.28			22	29			9	15		1.39346
														19	0.74			7	0.26			27	22			9	7
		163	0.00785006	63	0.00507238	235	0.0174043	82	0.0142683	237	0.0281838	67	0.0243218	30	1.26	250	0.0384	13	0.42	96	0.0321875	22	22	22.8	0.0462929	5	9	8.75	0.0386261		174	0.00764115	81	0.0050563	246	0.0172746	89	0.0141524	235	0.0280407	86	0.0241809	251	0.0382869	96	0.0320833	22.3	0.0461659
														22	0.75			6	0.18			19	20			10	19
														29	1.16			6	0.19			20	26			6	4
Average			0.00795526		0.0050205		0.0174503		0.0141962		0.0284089		0.0244322	250	9.6		0.0383683	96	3.09		0.0324234		456	22.6667	0.0461847		175	8.8	0.039128			0.0077394		0.00491914		0.017326		0.0141113		0.0282773		0.0242816		0.0382675		0.0323267	22.4833	0.0460652
22TR6SR31	57	209	2.82	83	1.54	199	3.47	72	1.03	244	8.25	72	2.89	24	0.99			6	0.19			22	20	22.59		8	12	8.06			199	2.69	82	1.53	209	4.72	86	2.32	267	8.89	86	3.23	218	8.61	86	2.8	455	21.34
			1.10044		1.10044						1.10044		1.10044	16	0.48		225	1	0.03		45	23	21	1.10044		7	7	1.10044				1.10044		1.10044		1.10044		1.10044		1.10044		1.10044
			1.71956		0.43956		3.47		1.03		7.14956		1.78956	19	0.73		8.9	1	0.04		1.47	22	25	21.4896		6	13	6.95956				1.58956		0.42956		3.61956		1.21956		7.78956		2.12956
														24	0.95			6	0.22			21	23			6	8
														23	0.89			5	0.16			27	22			11	6
														27	1.15			8	0.26			28	28			8	7		1.42246
														23	0.89			6	0.19			25	20			13	8
		209	0.00822756	83	0.0052959	199	0.0174372	72	0.0143056	244	0.0293015	72	0.024855	23	0.88	225	0.0395556	5	0.16	45	0.0326667	26	19	22.85	0.0470231	8	7	8.85	0.0393195		199	0.00798774	82	0.00523854	209	0.0173185	86	0.0141809	267	0.0291744	86	0.0247623	218	0.0394954	86	0.0325581	22.75	0.0469011
														25	1.08			6	0.19			18	18			13	5
														21	0.86			1	0.03			22	27			11	13
Average														225	8.9			45	1.47				457				177
22TR6SR32	60	178	2.58	47	1.35	209	3.66	74	1.06	235	7.92	54	2.45	19	0.83			5	0.15			27	21	22.36		8	16	8.28			182	2.59	79	1.51	212	4.79	89	2.37	233	7.83	76	2.99	207	8.08	81	2.66	451	21.21
			1.10044		1.10044						1.10044		1.10044	16	0.53		215	2	0.07		38	28	27	1.10044		8	10	1.10044				1.10044		1.10044		1.10044		1.10044		1.10044		1.10044
			1.47956		0.24956		3.66		1.06		6.81956		1.34956	19	0.84		8.42	1	0.03		1.25	16	29	21.2596		6	10	7.17956				1.48956		0.40956		3.68956		1.26956		6.72956		1.88956
														22	0.76			3	0.09			20	25			8	10
														26	0.97			5	0.18			20	26			11	8
														27	1.06			5	0.18			21	19			11	7		1.42196
														20	0.81			3	0.1			22	19			8	10
		178	0.00831213	47	0.00530979	209	0.017512	74	0.0143243	235	0.0290194	54	0.0249919	20	0.82	215	0.0391628	7	0.22	38	0.0328947	18	21	22.55	0.0471387	5	11	9.25	0.0388084		182	0.0081844	79	0.0051843	212	0.0174036	89	0.0142647	233	0.0288822	76	0.0248626	207	0.0390338	81	0.0328395	22.55	0.0470288
														26	0.99			6	0.19			20	22			11	11
														20	0.81			1	0.04			26	24			8	8
Average														215	8.42			38	1.25				451				185
22TR6SR33	63	161	2.45	80	1.53	194	3.39	70	1.01	194	6.75	51	2.37	22	0.87			9	0.27			20	32	22.85		6	8	7.94			185	2.62	69	1.46	286	6.06	97	2.49	224	7.61	79	3.06	237	9.24	83	2.71	457	21.46
			1.10044		1.10044						1.10044		1.10044	18	0.69		205	1	0.04		39	21	26	1.10044		10	8	1.10044				1.10044		1.10044		1.10044		1.10044		1.10044		1.10044
			1.34956		0.42956		3.39		1.01		5.64956		1.26956	23	0.94		8.02	7	0.23		1.28	27	21	21.7496		6	10	6.83956				1.51956		0.35956		4.95956		1.38956		6.50956		1.95956
														19	0.68			6	0.19			19	19			8	11
														21	0.85			6	0.2			24	27			11	12
														24	0.99			1	0.04			21	26			6	8		1.42946
														18	0.65			4	0.13			21	21			8	12
		161	0.00838236	80	0.0053695	194	0.0174742	70	0.0144286	194	0.0291214	51	0.0248933	18	0.64	205	0.039122	3	0.11	39	0.0328205	19	26	23.1	0.047077	11	8	8.8	0.0388611		185	0.00821384	69	0.00521101	286	0.0173411	97	0.0143254	224	0.0290605	79	0.0248046	237	0.0389873	83	0.0326506	22.85	0.0469584
														21	0.83			1	0.03			22	24			7	10
														21	0.88			1	0.04			24	22			8	8
Average			0.00830735		0.00532506		0.0174745		0.0143528		0.0291474		0.0249134	205	8.02		0.0392801	39	1.28		0.032794		462	22.8333	0.0470796		176	8.96667	0.0389964			0.00812866		0.00521128		0.0173544		0.014257		0.029039		0.0248098		0.0391722		0.0326827	22.7167	0.0469628
22TR4R11	64	183	2.59	114	1.68	223	3.83	98	1.37	261	8.62	104	3.69	29	1.18			16	0.56			25	28	23.91		13	21	9.39			169	2.44	106	1.63	219	4.83	109	2.61	263	8.65	89	3.31	236	9.06	102	3.3	475	22.19
			1.10044		1.10044						1.10044		1.10044	29	1.19		256	12	0.34		139	20	24	1.10044		9	16	1.10044				1.10044		1.10044		1.10044		1.10044		1.10044		1.10044
			1.48956		0.57956		3.83		1.37		7.51956		2.58956	27	1.06		9.86	16	0.57		4.51	23	29	22.8096		10	12	8.28956				1.33956		0.52956		3.72956		1.50956		7.54956		2.20956
														25	0.97			18	0.49			19	28			3	13
														25	0.97			10	0.31			29	21			11	1
														25	0.93			20	0.73			24	21			3	7		1.55496
														20	0.76			7	0.21			21	27			7	14
		183	0.00813967	114	0.00508386	223	0.0171749	98	0.0139796	261	0.0288106	104	0.0248996	19	0.71	256	0.0385156	15	0.56	139	0.032446	22	27	24.35	0.0468369	8	10	10.55	0.039287		169	0.00792639	106	0.00499585	219	0.01703	109	0.0138492	263	0.0287056	89	0.0248265	236	0.0383898	102	0.0323529	23.75	0.0467158
														27	0.97			10	0.31			23	27			12	16
														30	1.12			15	0.43			21	28			8	17
Average														256	9.86			139	4.51				487				211
22TR4R12	66	226	2.89	133	1.77	258	4.46	127	1.71	270	8.89	114	3.94	25	0.98			13	0.42			22	22	23.74		6	8	9.38			198	2.63	125	1.72	243	5.27	139	2.96	272	8.91	106	3.73	219	8.48	87	2.83	479	22.68
			1.10044		1.10044						1.10044		1.10044	12	0.45		242	8	0.28		104	28	21	1.10044		7	11	1.10044				1.10044		1.10044		1.10044		1.10044		1.10044		1.10044
			1.78956		0.66956		4.46		1.71		7.78956		2.83956	25	0.95		9.4	13	0.51		3.39	29	19	22.6396		18	7	8.27956				1.52956		0.61956		4.16956		1.85956		7.80956		2.62956
														24	0.89			8	0.25			24	29			8	9
														18	0.72			7	0.22			22	25			12	16
														31	1.21			13	0.31			26	24			7	8		1.54596
														28	1.01			10	0.26			26	24			18	9
		226	0.00791841	133	0.00503429	258	0.0172868	127	0.0134646	270	0.0288502	114	0.0249084	28	1.09	242	0.038843	10	0.36	104	0.0325962	24	23	23.85	0.0474624	12	9	10.25	0.0403881		198	0.00772505	125	0.00495648	243	0.0171587	139	0.0133781	272	0.0287116	106	0.0248072	219	0.0387215	87	0.0325287	23.95	0.0473486
														26	1.09			13	0.44			27	20			12	15
														25	1.01			9	0.34			25	17			7	6
Average														242	9.4			104	3.39				477				205
22TR4R13	68	220	2.85	117	1.68	233	4.02	111	1.49	202	6.91	70	2.84	27	0.97			11	0.37			22	29	23.91		18	6	9.33			195	2.6	116	1.66	241	5.23	99	2.42	212	7.17	89	3.31	256	9.8	80	2.61	477	22.51
			1.10044		1.10044						1.10044		1.10044	20	0.79		238	8	0.24		85	23	23	1.10044		6	8	1.10044				1.10044		1.10044		1.10044		1.10044		1.10044		1.10044
			1.74956		0.57956		4.02		1.49		5.80956		1.73956	26	1.08		9.14	12	0.39		2.77	19	26	22.8096		13	7	8.22956				1.49956		0.55956		4.12956		1.31956		6.06956		2.20956
														23	0.83			8	0.21			22	24			8	6
														21	0.75			5	0.16			19	23			6	7
														23	0.91			6	0.22			28	27			17	10		1.55196
														24	0.93			16	0.57			24	29			10	14
		220	0.00795255	117	0.0049535	233	0.0172532	111	0.0134234	202	0.0287602	70	0.0248509	21	0.77	238	0.0384034	6	0.17	85	0.0325882	25	30	24.1	0.0473227	14	8	10.15	0.0405397		195	0.00769005	116	0.00482379	241	0.0171351	99	0.0133289	212	0.02863	89	0.0248265	256	0.0382813	80	0.032625	23.85	0.0471908
														27	1.09			5	0.17			25	23			14	9
														26	1.02			8	0.27			17	24			16	6
Average			0.00800354		0.00502388		0.0172383		0.0136225		0.028807		0.0248863	238	9.14		0.0385873	85	2.77		0.0325435		482	24.1	0.0472073		203	10.3167	0.0400716			0.0077805		0.00492537		0.0171079		0.0135187		0.0286824		0.0248201		0.0384642		0.0325022	23.85	0.0470851
22TR4R21	65	227	2.91	93	1.57	264	4.49	128	1.77	227	7.68	53	2.42	24	0.93			7	0.21			26	25	23.99		7	12	9.12			211	2.73	106	1.62	239	5.14	96	2.42	263	8.69	94	3.43	219	8.34	89	2.86	466	21.98
			1.10044		1.10044						1.10044		1.10044	29	1.16		224	14	0.51		84	27	27	1.10044		8	6	1.10044				1.10044		1.10044		1.10044		1.10044		1.10044		1.10044
			1.80956		0.46956		4.49		1.77		6.57956		1.31956	18	0.71		8.56	8	0.23		2.71	22	21	22.8896		6	13	8.01956				1.62956		0.51956		4.03956		1.31956		7.58956		2.32956
														23	0.91			6	0.14			22	28			9	15
														18	0.65			6	0.21			27	23			11	13
														19	0.68			11	0.39			24	28			7	12		1.54546
														29	1.18			13	0.45			23	28			7	13
		227	0.00797163	93	0.00504903	264	0.0170076	128	0.0138281	227	0.0289848	53	0.0248974	22	0.82	224	0.0382143	7	0.24	84	0.0322619	19	22	24.2	0.0472925	7	13	9.9	0.0405028		211	0.00772303	106	0.00490151	239	0.0169019	96	0.0137454	263	0.0288576	94	0.0247826	219	0.0380822	89	0.0321348	23.3	0.0471674
														17	0.53			4	0.1			26	22			5	16
														25	0.99			8	0.23			24	20			5	13
Average														224	8.56			84	2.71				484				198
22TR4R22	67	158	2.38	87	1.55	274	4.71	116	1.56	308	9.97	133	4.39	33	1.29			16	0.58			28	24	23.59		7	7	9.58			161	2.36	96	1.58	254	5.44	104	2.49	248	8.21	92	3.37	286	10.9	83	2.69	476	22.43
			1.10044		1.10044						1.10044		1.10044	34	1.31		320	12	0.41		123	27	19	1.10044		12	12	1.10044				1.10044		1.10044		1.10044		1.10044		1.10044		1.10044
			1.27956		0.44956		4.71		1.56		8.86956		3.28956	33	1.26		12.24	9	0.31		3.99	22	20	22.4896		7	18	8.47956				1.25956		0.47956		4.33956		1.38956		7.10956		2.26956
														36	1.38			16	0.56			23	26			9	7
														23	0.85			8	0.29			23	23			6	17
														28	1.13			6	0.21			26	28			9	10		1.54846
														30	1.07			10	0.32			26	27			8	12
		158	0.00809848	87	0.00516736	274	0.0171898	116	0.0134483	308	0.0287973	133	0.0247335	32	1.26	320	0.03825	16	0.38	123	0.032439	20	22	23.8	0.047247	5	11	10.4	0.0407671		161	0.00782335	96	0.00499542	254	0.0170849	104	0.0133612	248	0.0286676	92	0.0246691	286	0.0381119	83	0.0324096	23.8	0.0471218
														34	1.32			11	0.37			27	22			9	13
														37	1.37			19	0.56			21	22			14	15
Average														320	12.24			123	3.99				476				208
22TR4R23	69	199	2.68	70	1.45	251	4.33	155	2.03	215	7.31	73	2.92	25	0.96			14	0.46			29	28	24.01		10	10	9.32			197	2.63	98	1.58	236	5.15	129	2.77	228	7.66	86	3.23	234	8.95	92	2.97	477	22.8
			1.10044		1.10044						1.10044		1.10044	25	0.94		250	8	0.27		89	20	21	1.10044		14	6	1.10044				1.10044		1.10044		1.10044		1.10044		1.10044		1.10044
			1.57956		0.34956		4.33		2.03		6.20956		1.81956	24	0.81		9.59	7	0.24		2.88	24	26	22.9096		10	16	8.21956				1.52956		0.47956		4.04956		1.66956		6.55956		2.12956
														24	0.91			9	0.29			29	18			7	8
														27	1.11			14	0.44			30	20			12	7
														21	0.86			4	0.16			25	25			9	13		1.55646
														27	1.07			10	0.32			22	20			13	7
		199	0.00793749	70	0.00499371	251	0.017251	155	0.0130968	215	0.0288817	73	0.0249255	27	1.08	250	0.03836	8	0.25	89	0.0323596	22	25	23.9	0.0479279	9	6	10.25	0.0400954		197	0.00776426	98	0.00489347	236	0.0171592	129	0.0129423	228	0.02877	86	0.0247623	234	0.0382479	92	0.0322826	23.85	0.0477987
														26	0.99			7	0.19			26	18			8	9
														24	0.86			8	0.26			26	24			12	19
Average			0.00800253		0.00507003		0.0171495		0.0134577		0.0288879		0.0248521	250	9.59		0.0382748	89	2.88		0.0323535		478	23.9667	0.0474891		205	10.1833	0.0404551			0.00777022		0.00493013		0.0170487		0.0133496		0.0287651		0.024738		0.0381473		0.0322757	23.65	0.0473627
	TR4R1		0.00813967		0.00508386		0.0171749		0.0139796		0.0288106		0.0248996				0.0385156				0.032446				0.0468369				0.039287			0.00792639		0.00499585		0.01703		0.0138492		0.0287056		0.0248265		0.0383898		0.0323529		0.0467158
	TR4R1		0.00791841		0.00503429		0.0172868		0.0134646		0.0288502		0.0249084				0.038843				0.0325962				0.0474624				0.0403881			0.00772505		0.00495648		0.0171587		0.0133781		0.0287116		0.0248072		0.0387215		0.0325287		0.0473486
	TR4R1		0.00795255		0.0049535		0.0172532		0.0134234		0.0287602		0.0248509				0.0384034				0.0325882				0.0473227				0.0405397			0.00769005		0.00482379		0.0171351		0.0133289		0.02863		0.0248265		0.0382813		0.032625		0.0471908
	TR4R2		0.00797163		0.00504903		0.0170076		0.0138281		0.0289848		0.0248974				0.0382143				0.0322619				0.0472925				0.0405028			0.00772303		0.00490151		0.0169019		0.0137454		0.0288576		0.0247826		0.0380822		0.0321348		0.0471674
	TR4R2		0.00809848		0.00516736		0.0171898		0.0134483		0.0287973		0.0247335				0.03825				0.032439				0.047247				0.0407671			0.00782335		0.00499542		0.0170849		0.0133612		0.0286676		0.0246691		0.0381119		0.0324096		0.0471218
	TR4R2		0.00793749		0.00499371		0.017251		0.0130968		0.0288817		0.0249255				0.03836				0.0323596				0.0479279				0.0400954			0.00776426		0.00489347		0.0171592		0.0129423		0.02877		0.0247623		0.0382479		0.0322826		0.0477987
	TR6R1		0.00787976		0.00487571		0.0172558		0.0137755		0.0288066		0.0241275				0.0380769				0.0324359				0.0466442				0.0391348			0.00763204		0.0047445		0.0171406		0.0136215		0.0286994		0.0240579		0.0379675		0.0323171		0.0465106
	TR6R1		0.00785851		0.00505922		0.0171071		0.0132759		0.0287242		0.0244654				0.0379856				0.0325962				0.0468727				0.0396293			0.0075569		0.00493446		0.0169824		0.0131216		0.028599		0.0243156		0.0379149		0.0324242		0.0467532
	TR6R1		0.0079304		0.00506247		0.0170492		0.0134899		0.0286872		0.0241275				0.0382828				0.0325743				0.0466586				0.0382806			0.00774133		0.00488136		0.016917		0.0133781		0.0285507		0.0239706		0.0381455		0.0324096		0.0465376
	TR6R2		0.00790267		0.00522227		0.0170286		0.0132308		0.0285618		0.0240371				0.0371245				0.0318462				0.045254				0.0379751			0.00769645		0.00505241		0.0169104		0.0131416		0.0284433		0.0239416		0.0369903		0.0316867		0.0451209
	TR6R2		0.0077978		0.00499405		0.0171321		0.0134211		0.0287534		0.0239233				0.0370992				0.0319828				0.0450099				0.0374974			0.0075765		0.00486263		0.0169945		0.0133005		0.0286264		0.0238296		0.0369685		0.0319048		0.044878
	TR6R2		0.00800862		0.00504183		0.0169744		0.01375		0.0287284		0.0241792				0.0373913				0.0312857				0.0454496				0.0377274			0.00780513		0.00493888		0.0168671		0.0136413		0.0286264		0.0240179		0.0372727		0.0311236		0.0453258
	TR6R3		0.00823051		0.00572747		0.0172197		0.013622		0.027707		0.0225589				0.0360643				0.0292308				0.0429525				0.0334612			0.00800661		0.00563921		0.0170868		0.0135144		0.0275783		0.0224337		0.0359514		0.029186		0.0428271
	TR6R3		0.00828788		0.00559		0.0173404		0.0139216		0.0277167		0.0223153				0.0361983				0.0294937				0.0425561				0.0337385			0.00811288		0.00546		0.01722		0.0138321		0.0275998		0.0221376		0.0360793		0.0294565		0.0424256
	TR6R3		0.00841559		0.00569256		0.0172523		0.0131429		0.0276479		0.022326				0.0364851				0.0291837				0.0429967				0.0334934			0.00821204		0.00551625		0.0171285		0.0130387		0.0275469		0.0221675		0.0363819		0.0290805		0.042864
	TRL6R1		0.00796962		0.00513117		0.0165766		0.0120652		0.0281423		0.0232505				0.0370968				0.0313978				0.0460869				0.0376087			0.00775166		0.0050563		0.0164496		0.0119308		0.0279908		0.0231533		0.0369767		0.0313043		0.0459735
	TRL6R1		0.00800757		0.00506806		0.0167403		0.0123684		0.0282526		0.0232044				0.0370076				0.0315929				0.0464722				0.0387975			0.00774484		0.00492116		0.0166298		0.0122635		0.0281178		0.0230713		0.0368776		0.0315054		0.0463492
	TRL6R1		0.00783089		0.00499154		0.0168783		0.0121429		0.0284303		0.0231713				0.0370742				0.0316495				0.0460603				0.0382733			0.00761924		0.00486615		0.0167817		0.0120137		0.0282969		0.0230536		0.0369333		0.0314894		0.0459465
	TRL6R2		0.0081838		0.00495099		0.0173558		0.0146154		0.0286759		0.024884				0.0382143				0.0326214				0.047499				0.0404165			0.00800661		0.00499463		0.0172302		0.0145004		0.0285575		0.0247567		0.0380889		0.0324742		0.0473696
	TRL6R2		0.00808261		0.00523094		0.0174146		0.0140141		0.0288071		0.0247463				0.0382609				0.0327586				0.0475551				0.0404068			0.00790592		0.0051636		0.0173017		0.0138638		0.0286856		0.0246035		0.0381481		0.0326829		0.0474279
	TRL6R2		0.00778635		0.00505241		0.0175		0.013964		0.0286137		0.0247941				0.0383784				0.0321918				0.0469238				0.0398812			0.00761672		0.00494022		0.0173821		0.0138277		0.0284867		0.024646		0.0382684		0.0320253		0.0468009
	TRL6R3		0.00872224		0.00572327		0.0176126		0.0145588		0.0295502		0.0249572				0.0393562				0.0338983				0.0460368				0.0389425			0.00846754		0.00560776		0.0174873		0.0144853		0.0294353		0.0248408		0.039246		0.0338372		0.0459062
	TRL6R3		0.00860867		0.0058281		0.017598		0.0143373		0.0294839		0.0249908				0.0392576				0.0335556				0.046694				0.038157			0.00840916		0.00585701		0.017462		0.0142343		0.0293847		0.024814		0.0391324		0.0334568		0.0465733
	TRL6R3		0.00854589		0.00571059		0.0174479		0.0143609		0.0297686		0.0249108				0.0393798				0.0332727				0.0463421				0.0377413			0.00836327		0.00560336		0.0173312		0.0142015		0.0296662		0.0248094		0.0392469		0.0331646		0.0462241
	TRS6R1		0.00785062		0.004995		0.0167805		0.012069		0.028246		0.023065				0.0371359				0.0313793				0.0464867				0.0379636			0.00754979		0.00484404		0.016665		0.0119147		0.0281121		0.0229547		0.0370335		0.0312195		0.0463719
	TRS6R1		0.00812608		0.004936		0.0167727		0.0125203		0.0280674		0.0232085				0.0374453				0.0317197				0.0461664				0.037442			0.00798709		0.00480456		0.0166498		0.0123996		0.0279445		0.0230564		0.0373106		0.0316038		0.0460394
	TRS6R1		0.00798465		0.00514938		0.01672		0.0119388		0.0281285		0.0230054				0.0371315				0.0316667				0.045735				0.0372963			0.0077478		0.00499488		0.0165793		0.0120383		0.0280065		0.0230162		0.037012		0.0315663		0.0456109
	TRS6R2		0.00796962		0.00499436		0.0174569		0.0141803		0.0287303		0.0245501				0.0384874				0.0328				0.0464196				0.0397101			0.00772254		0.0048786		0.0173549		0.0140734		0.0286235		0.0243833		0.0383772		0.0326744		0.0463029
	TRS6R2		0.0080461		0.00499476		0.0174899		0.0141401		0.0283125		0.0244248				0.0382174				0.0322826				0.0458415				0.0390478			0.00785452		0.00482253		0.0173485		0.014108		0.0281677		0.0242805		0.0381385		0.0322222		0.0457269
	TRS6R2		0.00785006		0.00507238		0.0174043		0.0142683		0.0281838		0.0243218				0.0384				0.0321875				0.0462929				0.0386261			0.00764115		0.0050563		0.0172746		0.0141524		0.0280407		0.0241809		0.0382869		0.0320833		0.0461659
	TRS6R3		0.00822756		0.0052959		0.0174372		0.0143056		0.0293015		0.024855				0.0395556				0.0326667				0.0470231				0.0393195			0.00798774		0.00523854		0.0173185		0.0141809		0.0291744		0.0247623		0.0394954		0.0325581		0.0469011
	TRS6R3		0.00831213		0.00530979		0.017512		0.0143243		0.0290194		0.0249919				0.0391628				0.0328947				0.0471387				0.0388084			0.0081844		0.0051843		0.0174036		0.0142647		0.0288822		0.0248626		0.0390338		0.0328395		0.0470288
	TRS6R3		0.00838236		0.0053695		0.0174742		0.0144286		0.0291214		0.0248933				0.039122				0.0328205				0.047077				0.0388611			0.00821384		0.00521101		0.0173411		0.0143254		0.0290605		0.0248046		0.0389873		0.0326506		0.0469584
	T1R1		8.13967		5.08386		17.1749		13.9796		28.8106		24.8996				38.5156				32.446				46.8369				39.287			7.92639		4.99585		17.03		13.8492		28.7056		24.8265		38.3898		32.3529		46.7158
	T1R1		7.91841		5.03429		17.2868		13.4646		28.8502		24.9084				38.843				32.5962				47.4624				40.3881			7.72505		4.95648		17.1587		13.3781		28.7116		24.8072		38.7215		32.5287		47.3486
	T1R1		7.95255		4.9535		17.2532		13.4234		28.7602		24.8509				38.4034				32.5882				47.3227				40.5397			7.69005		4.82379		17.1351		13.3289		28.63		24.8265		38.2812		32.625		47.1908
	T1R2		7.97163		5.04903		17.0076		13.8281		28.9848		24.8974				38.2143				32.2619				47.2925				40.5028			7.72303		4.90151		16.9019		13.7454		28.8576		24.7826		38.0822		32.1348		47.1674
	T1R2		8.09848		5.16736		17.1898		13.4483		28.7973		24.7335				38.25				32.439				47.247				40.7671			7.82335		4.99542		17.0849		13.3612		28.6676		24.6691		38.1119		32.4096		47.1218
	T1R2		7.93749		4.99371		17.251		13.0968		28.8817		24.9255				38.36				32.3596				47.9279				40.0954			7.76426		4.89347		17.1592		12.9423		28.77		24.7623		38.2479		32.2826		47.7987
	T2R1		7.87976		4.87571		17.2558		13.7755		28.8066		24.1275				38.0769				32.4359				46.6442				39.1348			7.63204		4.7445		17.1406		13.6215		28.6994		24.0579		37.9675		32.3171		46.5106
	T2R1		7.85851		5.05922		17.1071		13.2759		28.7242		24.4654				37.9856				32.5962				46.8727				39.6293			7.5569		4.93446		16.9824		13.1216		28.599		24.3156		37.9149		32.4242		46.7532
	T2R1		7.9304		5.06247		17.0492		13.4899		28.6872		24.1275				38.2828				32.5743				46.6586				38.2806			7.74133		4.88136		16.917		13.3781		28.5507		23.9706		38.1455		32.4096		46.5376
	T2R2		7.90267		5.22227		17.0286		13.2308		28.5618		24.0371				37.1245				31.8462				45.254				37.9751			7.69645		5.05241		16.9104		13.1416		28.4433		23.9416		36.9903		31.6867		45.1209
	T2R2		7.7978		4.99405		17.1321		13.4211		28.7534		23.9233				37.0992				31.9828				45.0099				37.4974			7.5765		4.86263		16.9945		13.3005		28.6264		23.8296		36.9685		31.9048		44.878
	T2R2		8.00862		5.04183		16.9744		13.75		28.7284		24.1792				37.3913				31.2857				45.4496				37.7274			7.80513		4.93888		16.8671		13.6412		28.6264		24.0179		37.2727		31.1236		45.3258
	T2R3		8.23051		5.72747		17.2197		13.622		27.707		22.5589				36.0643				29.2308				42.9525				33.4612			8.00661		5.63921		17.0868		13.5144		27.5783		22.4337		35.9514		29.186		42.8271
	T2R3		8.28788		5.59		17.3404		13.9216		27.7167		22.3153				36.1983				29.4937				42.5561				33.7385			8.11288		5.46		17.22		13.8321		27.5998		22.1376		36.0793		29.4565		42.4256
	T2R3		8.41559		5.69256		17.2523		13.1429		27.6479		22.326				36.4851				29.1837				42.9967				33.4934			8.21204		5.51625		17.1285		13.0387		27.5469		22.1675		36.3819		29.0805		42.864
	T3R1		7.96962		5.13117		16.5766		12.0652		28.1423		23.2505				37.0968				31.3978				46.0869				37.6087			7.75166		5.0563		16.4496		11.9308		27.9908		23.1533		36.9767		31.3043		45.9735
	T3R1		8.00757		5.06806		16.7403		12.3684		28.2526		23.2044				37.0076				31.5929				46.4722				38.7975			7.74484		4.92116		16.6298		12.2635		28.1178		23.0713		36.8776		31.5054		46.3492
	T3R1		7.83089		4.99154		16.8783		12.1429		28.4303		23.1713				37.0742				31.6495				46.0603				38.2733			7.61924		4.86615		16.7817		12.0137		28.2969		23.0536		36.9333		31.4894		45.9465
	T3R2		8.1838		4.95099		17.3558		14.6154		28.6759		24.884				38.2143				32.6214				47.499				40.4165			8.00661		4.99463		17.2302		14.5004		28.5575		24.7567		38.0889		32.4742		47.3696
	T3R2		8.08261		5.23094		17.4146		14.0141		28.8071		24.7463				38.2609				32.7586				47.5551				40.4068			7.90592		5.1636		17.3017		13.8638		28.6856		24.6035		38.1481		32.6829		47.4279
	T3R2		7.78635		5.05241		17.5		13.964		28.6137		24.7941				38.3784				32.1918				46.9238				39.8812			7.61672		4.94022		17.3821		13.8277		28.4867		24.646		38.2684		32.0253		46.8009
	T3R3		8.72224		5.72327		17.6126		14.5588		29.5502		24.9572				39.3562				33.8983				46.0368				38.9425			8.46754		5.60776		17.4873		14.4853		29.4353		24.8408		39.246		33.8372		45.9062
	T3R3		8.60867		5.8281		17.598		14.3373		29.4839		24.9908				39.2576				33.5556				46.694				38.157			8.40916		5.85701		17.462		14.2343		29.3847		24.814		39.1324		33.4568		46.5733
	T3R3		8.54589		5.71059		17.4479		14.3609		29.7686		24.9108				39.3798				33.2727				46.3421				37.7413			8.36327		5.60336		17.3312		14.2015		29.6662		24.8094		39.2469		33.1646		46.2241
	T4R1		7.85062		4.995		16.7805		12.069		28.246		23.065				37.1359				31.3793				46.4867				37.9636			7.54979		4.84404		16.665		11.9147		28.1121		22.9547		37.0335		31.2195		46.3719
	T4R1		8.12608		4.936		16.7727		12.5203		28.0674		23.2085				37.4453				31.7197				46.1664				37.442			7.98709		4.80456		16.6498		12.3996		27.9445		23.0564		37.3106		31.6038		46.0394
	T4R1		7.98465		5.14938		16.72		11.9388		28.1285		23.0054				37.1315				31.6667				45.735				37.2963			7.7478		4.99488		16.5793		12.0383		28.0065		23.0162		37.012		31.5663		45.6109
	T4R2		7.96962		4.99436		17.4569		14.1803		28.7303		24.5501				38.4874				32.8				46.4196				39.7101			7.72254		4.8786		17.3549		14.0734		28.6235		24.3833		38.3772		32.6744		46.3029
	T4R2		8.0461		4.99476		17.4899		14.1401		28.3125		24.4248				38.2174				32.2826				45.8415				39.0478			7.85452		4.82253		17.3485		14.108		28.1677		24.2805		38.1385		32.2222		45.7269
	T4R2		7.85006		5.07238		17.4043		14.2683		28.1838		24.3218				38.4				32.1875				46.2929				38.6261			7.64115		5.0563		17.2746		14.1524		28.0407		24.1809		38.2869		32.0833		46.1659
	T4R3		8.22756		5.2959		17.4372		14.3056		29.3015		24.855				39.5556				32.6667				47.0231				39.3195			7.98774		5.23854		17.3185		14.1809		29.1744		24.7623		39.4954		32.5581		46.9011
	T4R3		8.31213		5.30979		17.512		14.3243		29.0194		24.9919				39.1628				32.8947				47.1387				38.8084			8.1844		5.1843		17.4036		14.2647		28.8822		24.8626		39.0338		32.8395		47.0288
	T4R3		8.38236		5.3695		17.4742		14.4286		29.1214		24.8933				39.122				32.8205				47.077				38.8611			8.21384		5.21101		17.3411		14.3254		29.0605		24.8046		38.9873		32.6506		46.9584
	T1R1		8.00354	0.119122	c		17.2383	0.057437	b		28.807	0.0451185	c				38.5873	0.228408	b						47.2073	0.328336	ab					7.7805	0.127553	c		17.1079	0.0685365	b		28.6824	0.0454721	c		38.4642	0.22933	b		47.0851	0.329403
	T2R2		8.00253	0.0848291	c		17.1495	0.126622	bc		28.8879	0.0939429	c				38.2748	0.0759475	c						47.4891	0.380706	a					7.77022	0.0504247	c		17.0487	0.132386	bc		28.7651	0.0951267	c		38.1473	0.0883347	c		47.3627	0.378346
	AverageT1		8.00304				17.1939				28.8475						38.431								47.3482							7.77536				17.0783				28.7237				38.3057				47.2239
	T2R1		7.88956	0.0369331	c		17.1374	0.106583	bc		28.7393	0.0611531	c				38.1151	0.152246	c						46.7252	0.12798	bc					7.64343	0.0927398	c		17.0133	0.114987	bc		28.6164	0.0758504	c		38.0093	0.12083	c		46.6005	0.132964
	T2R2		7.90303	0.10541	c		17.045	0.0801317	c		28.6812	0.104119	c				37.205	0.161835	d						45.2378	0.220292	e					7.6927	0.114362	c		16.924	0.0647904	c		28.5654	0.105687	c		37.0772	0.169704	d		45.1083	0.224164
	T2R3		8.31133	0.0947432	b		17.2708	0.0624491	b		27.6905	0.037274	f				36.2493	0.215014	e						42.8351	0.242638	f					8.11051	0.102736	b		17.1451	0.0681522	b		27.575	0.0266205	f		36.1375	0.221078	e		42.7056	0.243131
	AverageT2		8.03464				17.1511				28.3704						37.1898								44.9327							7.81554				17.0275				28.2522				37.0747				44.8048
	T3R1		7.93603	0.0930094	c		16.7317	0.151049	d		28.2751	0.145339	de				37.0595	0.0463823	d						46.2065	0.230521	d					7.70525	0.0745581	c		16.6204	0.166264	d		28.1352	0.153824	de		36.9292	0.0496803	d		46.0897	0.225111
	T3R2		8.01758	0.20655	c		17.4235	0.07252	a		28.6989	0.098724	c				38.2845	0.0845624	c						47.326	0.349405	a					7.84308	0.202398	c		17.3047	0.0760084	a		28.5766	0.100813	c		38.1685	0.0914653	c		47.1995	0.346417
	T3R3		8.6256	0.0893877	a		17.5529	0.0911719	a		29.6009	0.14897	a				39.3312	0.0648201	a						46.3576	0.328861	cd					8.41332	0.0522605	a		17.4268	0.0837518	a		29.4954	0.150068	a		39.2084	0.0658347	a		46.2345	0.333669
	AverageT3		8.19307				17.236				28.8583						38.2251								46.63							7.98722				17.1173				28.7357				38.1021				46.5079
	T4R1		7.98712	0.137747	c		16.7577	0.0329119	d		28.1473	0.0907393	e				37.2376	0.179891	d						46.1294	0.377234	d					7.76156	0.218974	c		16.6314	0.0457079	d		28.021	0.0847612	e		37.1187	0.166558	d		46.0074	0.38152
	T4R2		7.95526	0.0988041	c		17.4503	0.0431861	a		28.4089	0.285729	d				38.3683	0.137771	bc						46.1847	0.303873	d					7.7394	0.107682	c		17.326	0.0446175	a		28.2773	0.306484	d		38.2675	0.120501	bc		46.0652	0.300923
	T4R3		8.30735	0.077511	b		17.4745	0.0373884	a		29.1474	0.142821	b				39.2801	0.239425	a						47.0796	0.0578481	ab					8.12866	0.122924	b		17.3544	0.0440828	a		29.039	0.147255	b		39.1722	0.280882	a		46.9628	0.0639744
	AverageT4		8.08324				17.2275				28.5679						38.2953								46.4645							7.87654				17.1039				28.4458				38.1861				46.3451
T1R1					c				b				c						b								ab							c				b				c				b
T1R1					c				bc				c						c								a							c				bc				c				c
T1R1					c				bc				c						c								bc							c				bc				c				c
T1R2					c				c				c						d								e							c				c				c				d
T1R2					b				b				f						e								f							b				b				f				e
T1R2					c				d				de						d								d							c				d				de				d
T2R1					c				a				c						c								a							c				a				c				c
T2R1					a				a				a						a								cd							a				a				a				a
T2R1					c				d				e						d								d							c				d				e				d
T2R2					c				a				d						bc								d							c				a				d				bc
T2R2					b				a				b						a								ab							b				a				b				a
T2R2
T2R3
T2R3	T1R1				5.02388	0.0657973	c		13.6225	0.30991	b		24.8863	0.0310067	a					32.5435	0.0844734	bc						40.0716	0.683691	a				4.92537	0.0901471	c		13.5187	0.28723	b		24.8201	0.01117	a		32.5022	0.137953	b
T3R1	T2R2				5.07003	0.0887057	c		13.4577	0.365767	b		24.8521	0.10366	a					32.3535	0.088715	c						40.4551	0.338382	a				4.93013	0.0566811	c		13.3496	0.401669	b		24.738	0.0604969	a		32.2757	0.137534	b
T3R1	AverageT1				5.04696				13.5401				24.8692							32.4485								40.2634						4.92775				13.4342				24.779				32.389
T3R1	T2R1				4.99913	0.106897	c		13.5138	0.250675	b		24.2401	0.195113	c					32.5354	0.0868956	bc						39.0149	0.68228	bc				4.85344	0.098009	c		13.3737	0.250017	b		24.1147	0.179348	c		32.3837	0.0581189	b
T3R2	T2R2				5.08605	0.120364	c		13.4673	0.262683	b		24.0466	0.128185	d					31.7049	0.369374	d						37.7333	0.238862	d				4.95131	0.0954998	c		13.3611	0.255273	b		23.9297	0.0947313	d		31.5717	0.40309	c
T3R2	T2R3				5.67001	0.0714538	a		13.5622	0.392795	b		22.4001	0.137618	f					29.3027	0.16705	e						33.5644	0.151665	e				5.53849	0.0916499	a		13.4617	0.399315	b		22.2463	0.16297	f		29.241	0.193962	d
T3R2	AverageT2				5.25173				13.5144				23.5622							31.181								36.7709						5.11441				13.3989				23.4302				31.0655
T3R3	T3R1				5.06359	0.0699236	c		12.1922	0.157501	c		23.2087	0.0397653	e					31.5468	0.132018	d						38.2265	0.595792	cd				4.94787	0.0978449	c		12.0693	0.173211	c		23.0927	0.053159	e		31.433	0.111728	c
T3R3	T3R2				5.07811	0.141732	c		14.1978	0.362497	a		24.8082	0.0698963	a					32.5239	0.295715	bc						40.2348	0.306319	a				5.03282	0.11648	c		14.0639	0.37841	a		24.6687	0.0790522	a		32.3942	0.336038	b
T3R3	T3R3				5.75399	0.0644936	a		14.419	0.12164	a		24.9529	0.0401739	a					33.5755	0.313267	a						38.2803	0.610004	bcd				5.68938	0.145192	a		14.307	0.155246	a		24.8214	0.0169831	a		33.4862	0.337288	a
T4R1	AverageT3				5.29856				13.603				24.3233							32.5487								38.9139						5.22335				13.4801				24.1943				32.4378
T4R1	T4R1				5.02679	0.110183	c		12.176	0.305198	c		23.093	0.104371	e					31.5886	0.183161	d						37.5673	0.350853	d				4.88116	0.100446	c		12.1175	0.251966	c		23.0091	0.0512354	e		31.4632	0.211857	c
T4R1	T4R2				5.0205	0.0449301	c		14.1962	0.0655493	a		24.4322	0.114335	b					32.4234	0.32962	bc						39.128	0.546458	b				4.91914	0.122042	c		14.1113	0.0395796	a		24.2816	0.101172	b		32.3267	0.309072	b
T4R2	T4R3				5.32506	0.0391041	b		14.3528	0.066273	a		24.9134	0.0705972	a					32.794	0.116328	b						38.9964	0.281116	bc				5.21128	0.0271174	b		14.257	0.0725238	a		24.8098	0.0503611	a		32.6827	0.143412	b
T4R2	AverageT4				5.12412				13.575				24.1462							32.2686								38.5639						5.00386				13.4953				24.0335				32.1575
T4R2
T4R3
T4R3							c				b				a							bc								a						c				b				a				b
T4R3							c				b				a							c								a						c				b				a				b
							c				b				c							bc								bc						c				b				c				b
							c				b				d							d								d						c				b				d				c
							a				b				f							e								e						a				b				f				d
							c				c				e							d								cd						c				c				e				c
							c				a				a							bc								a						c				a				a				b
							a				a				a							a								bcd						a				a				a				a
							c				c				e							d								d						c				c				e				c
							c				a				b							bc								b						c				a				b				b
							b				a				a							b								bc						b				a				a				b
		T1R1		8.00354	0.119122	c	17.2383	0.057437	b	28.807	0.0451185	c	38.5873	0.228408	b	47.2073	0.328336	ab															7.7805	0.127553	c	17.1079	0.0685365	b	28.6824	0.0454721	c	38.4642	0.22933	b	47.0851	0.329403	ab
		T2R2		8.00253	0.0848291	c	17.1495	0.126622	bc	28.8879	0.0939429	c	38.2748	0.0759475	c	47.4891	0.380706	a															7.77022	0.0504247	c	17.0487	0.132386	bc	28.7651	0.0951267	c	38.1473	0.0883347	c	47.3627	0.378346	a
		AverageT1		8.00304			17.1939			28.8475			38.431			47.3482																	7.77536			17.0783			28.7237			38.3057			47.2239
		T2R1		7.88956	0.0369331	c	17.1374	0.106583	bc	28.7393	0.0611531	c	38.1151	0.152246	c	46.7252	0.12798	bc															7.64343	0.0927398	c	17.0133	0.114987	bc	28.6164	0.0758504	c	38.0093	0.12083	c	46.6005	0.132964	bc
		T2R2		7.90303	0.10541	c	17.045	0.0801317	c	28.6812	0.104119	c	37.205	0.161835	d	45.2378	0.220292	e															7.6927	0.114362	c	16.924	0.0647904	c	28.5654	0.105687	c	37.0772	0.169704	d	45.1083	0.224164	e
		T2R3		8.31133	0.0947432	b	17.2708	0.0624491	b	27.6905	0.037274	f	36.2493	0.215014	e	42.8351	0.242638	f															8.11051	0.102736	b	17.1451	0.0681522	b	27.575	0.0266205	f	36.1375	0.221078	e	42.7056	0.243131	f
		AverageT2		8.03464	0		17.1511			28.3704			37.1898			44.9327																	7.81554			17.0275			28.2522			37.0747			44.8048
		T3R1		7.93603	0.0930094	c	16.7317	0.151049	d	28.2751	0.145339	de	37.0595	0.0463823	d	46.2065	0.230521	d															7.70525	0.0745581	c	16.6204	0.166264	d	28.1352	0.153824	de	36.9292	0.0496803	d	46.0897	0.225111	d
		T3R2		8.01758	0.20655	c	17.4235	0.07252	a	28.6989	0.098724	c	38.2845	0.0845624	c	47.326	0.349405	a															7.84308	0.202398	c	17.3047	0.0760084	a	28.5766	0.100813	c	38.1685	0.0914653	c	47.1995	0.346417	a
		T3R3		8.6256	0.0893877	a	17.5529	0.0911719	a	29.6009	0.14897	a	39.3312	0.0648201	a	46.3576	0.328861	cd															8.41332	0.0522605	a	17.4268	0.0837518	a	29.4954	0.150068	a	39.2084	0.0658347	a	46.2345	0.333669	cd
		AverageT3		8.19307			17.236			28.8583			38.2251			46.63																	7.98722			17.1173			28.7357			38.1021			46.5079
		T4R1		7.98712	0.137747	c	16.7577	0.0329119	d	28.1473	0.0907393	e	37.2376	0.179891	d	46.1294	0.377234	d															7.76156	0.218974	c	16.6314	0.0457079	d	28.021	0.0847612	e	37.1187	0.166558	d	46.0074	0.38152	d
		T4R2		7.95526	0.0988041	c	17.4503	0.0431861	a	28.4089	0.285729	d	38.3683	0.137771	bc	46.1847	0.303873	d															7.7394	0.107682	c	17.326	0.0446175	a	28.2773	0.306484	d	38.2675	0.120501	bc	46.0652	0.300923	d
		T4R3		8.30735	0.077511	b	17.4745	0.0373884	a	29.1474	0.142821	b	39.2801	0.239425	a	47.0796	0.0578481	ab															8.12866	0.122924	b	17.3544	0.0440828	a	29.039	0.147255	b	39.1722	0.280882	a	46.9628	0.0639744	ab
		AverageT4		8.08324	0		17.2275			28.5679			38.2953			46.4645																	7.87654			17.1039			28.4458			38.1861			46.3451
		T1R1		5.02388	0.0657973	c	13.6225	0.30991	b	24.8863	0.0310067	a	32.5435	0.0844734	bc	40.0716	0.683691	a															4.92537	0.0901471	c	13.5187	0.28723	b	24.8201	0.01117	a	32.5022	0.137953	b	39.9426	0.691078	a
		T2R2		5.07003	0.0887057	c	13.4577	0.365767	b	24.8521	0.10366	a	32.3535	0.088715	c	40.4551	0.338382	a															4.93013	0.0566811	c	13.3496	0.401669	b	24.738	0.0604969	a	32.2757	0.137534	b	40.3319	0.318446	a
		AverageT1		5.04696			13.5401			24.8692			32.4485			40.2634																	4.92775			13.4342			24.779			32.389			40.1373
		T2R1		4.99913	0.106897	c	13.5138	0.250675	b	24.2401	0.195113	c	32.5354	0.0868956	bc	39.0149	0.68228	bc															4.85344	0.098009	c	13.3737	0.250017	b	24.1147	0.179348	c	32.3837	0.0581189	b	38.8914	0.658149	bc
		T2R2		5.08605	0.120364	c	13.4673	0.262683	b	24.0466	0.128185	d	31.7049	0.369374	d	37.7333	0.238862	d															4.95131	0.0954998	c	13.3611	0.255273	b	23.9297	0.0947313	d	31.5717	0.40309	c	37.6252	0.222381	d
		T2R3		5.67001	0.0714538	a	13.5622	0.392795	b	22.4001	0.137618	f	29.3027	0.16705	e	33.5644	0.151665	e															5.53849	0.0916499	a	13.4617	0.399315	b	22.2463	0.16297	f	29.241	0.193962	d	33.4268	0.146712	e
		AverageT2		5.25173			13.5144			23.5622			31.181			36.7709																	5.11441			13.3989			23.4302			31.0655			36.6478
		T3R1		5.06359	0.0699236	c	12.1922	0.157501	c	23.2087	0.0397653	e	31.5468	0.132018	d	38.2265	0.595792	cd															4.94787	0.0978449	c	12.0693	0.173211	c	23.0927	0.053159	e	31.433	0.111728	c	38.0999	0.588672	cd
		T3R2		5.07811	0.141732	c	14.1978	0.362497	a	24.8082	0.0698963	a	32.5239	0.295715	bc	40.2348	0.306319	a															5.03282	0.11648	c	14.0639	0.37841	a	24.6687	0.0790522	a	32.3942	0.336038	b	40.1221	0.307173	a
		T3R3		5.75399	0.0644936	a	14.419	0.12164	a	24.9529	0.0401739	a	33.5755	0.313267	a	38.2803	0.610004	bcd															5.68938	0.145192	a	14.307	0.155246	a	24.8214	0.0169831	a	33.4862	0.337288	a	38.1518	0.61789	bcd
		AverageT3		5.29856			13.603			24.3233			32.5487			38.9139																	5.22335			13.4801			24.1943			32.4378			38.7913
		T4R1		5.02679	0.110183	c	12.176	0.305198	c	23.093	0.104371	e	31.5886	0.183161	d	37.5673	0.350853	d															4.88116	0.100446	c	12.1175	0.251966	c	23.0091	0.0512354	e	31.4632	0.211857	c	37.4473	0.364405	d
		T4R2		5.0205	0.0449301	c	14.1962	0.0655493	a	24.4322	0.114335	b	32.4234	0.32962	bc	39.128	0.546458	b															4.91914	0.122042	c	14.1113	0.0395796	a	24.2816	0.101172	b	32.3267	0.309072	b	39.0022	0.545169	b
		T4R3		5.32506	0.0391041	b	14.3528	0.066273	a	24.9134	0.0705972	a	32.794	0.116328	b	38.9964	0.281116	bc															5.21128	0.0271174	b	14.257	0.0725238	a	24.8098	0.0503611	a	32.6827	0.143412	b	38.8645	0.25418	bc
		AverageT4		5.12412			13.575			24.1462			32.2686			38.5639																	5.00386			13.4953			24.0335			32.1575			38.438
	AT1R1
	AT1R1
	AT1R1
	AT1R2
	AT1R2
	AT1R2
	AT2R1
	AT2R1
	AT2R1
	AT2R2
	AT2R2
	AT2R2
	AT2R3
	AT2R3
	AT2R3
	AT3R1
	AT3R1
	AT3R1
	AT3R2
	AT3R2
	AT3R2
	AT3R3
	AT3R3
	AT3R3
	AT4R1
	AT4R1
	AT4R1
	AT4R2
	AT4R2
	AT4R2
	AT4R3
	AT4R3
	AT4R3
	BT1R1
	BT1R1
	BT1R1
	BT1R2
	BT1R2
	BT1R2
	BT2R1
	BT2R1
	BT2R1
	BT2R2
	BT2R2
	BT2R2
	BT2R3
	BT2R3
	BT2R3
	BT3R1
	BT3R1
	BT3R1
	BT3R2
	BT3R2
	BT3R2
	BT3R3
	BT3R3
	BT3R3
	BT4R1
	BT4R1
	BT4R1
	BT4R2
	BT4R2
	BT4R2
	BT4R3
	BT4R3
	BT4R3
		AT1R1		8.13967				17.1749				28.8106						38.5156								46.8369							7.92639				17.03				28.7056				38.3898				46.7158
		AT1R1		7.91841				17.2868				28.8502						38.843								47.4624							7.72505				17.1587				28.7116				38.7215				47.3486
		AT1R1		7.95255				17.2532				28.7602						38.4034								47.3227							7.69005				17.1351				28.63				38.2812				47.1908
		AT1R2		7.97163				17.0076				28.9848						38.2143								47.2925							7.72303				16.9019				28.8576				38.0822				47.1674
		AT1R2		8.09848				17.1898				28.7973						38.25								47.247							7.82335				17.0849				28.6676				38.1119				47.1218
		AT1R2		7.93749				17.251				28.8817						38.36								47.9279							7.76426				17.1592				28.77				38.2479				47.7987
		AT2R1		7.87976				17.2558				28.8066						38.0769								46.6442							7.63204				17.1406				28.6994				37.9675				46.5106
		AT2R1		7.85851				17.1071				28.7242						37.9856								46.8727							7.5569				16.9824				28.599				37.9149				46.7532
		AT2R1		7.9304				17.0492				28.6872						38.2828								46.6586							7.74133				16.917				28.5507				38.1455				46.5376
		AT2R2		7.90267				17.0286				28.5618						37.1245								45.254							7.69645				16.9104				28.4433				36.9903				45.1209
		AT2R2		7.7978				17.1321				28.7534						37.0992								45.0099							7.5765				16.9945				28.6264				36.9685				44.878
		AT2R2		8.00862				16.9744				28.7284						37.3913								45.4496							7.80513				16.8671				28.6264				37.2727				45.3258
		AT2R3		8.23051				17.2197				27.707						36.0643								42.9525							8.00661				17.0868				27.5783				35.9514				42.8271
		AT2R3		8.28788				17.3404				27.7167						36.1983								42.5561							8.11288				17.22				27.5998				36.0793				42.4256
		AT2R3		8.41559				17.2523				27.6479						36.4851								42.9967							8.21204				17.1285				27.5469				36.3819				42.864
		AT3R1		7.96962				16.5766				28.1423						37.0968								46.0869							7.75166				16.4496				27.9908				36.9767				45.9735
		AT3R1		8.00757				16.7403				28.2526						37.0076								46.4722							7.74484				16.6298				28.1178				36.8776				46.3492
		AT3R1		7.83089				16.8783				28.4303						37.0742								46.0603							7.61924				16.7817				28.2969				36.9333				45.9465
		AT3R2		8.1838				17.3558				28.6759						38.2143								47.499							8.00661				17.2302				28.5575				38.0889				47.3696
		AT3R2		8.08261				17.4146				28.8071						38.2609								47.5551							7.90592				17.3017				28.6856				38.1481				47.4279
		AT3R2		7.78635				17.5				28.6137						38.3784								46.9238							7.61672				17.3821				28.4867				38.2684				46.8009
		AT3R3		8.72224				17.6126				29.5502						39.3562								46.0368							8.46754				17.4873				29.4353				39.246				45.9062
		AT3R3		8.60867				17.598				29.4839						39.2576								46.694							8.40916				17.462				29.3847				39.1324				46.5733
		AT3R3		8.54589				17.4479				29.7686						39.3798								46.3421							8.36327				17.3312				29.6662				39.2469				46.2241
		AT4R1		7.85062				16.7805				28.246						37.1359								46.4867							7.54979				16.665				28.1121				37.0335				46.3719
		AT4R1		8.12608				16.7727				28.0674						37.4453								46.1664							7.98709				16.6498				27.9445				37.3106				46.0394
		AT4R1		7.98465				16.72				28.1285						37.1315								45.735							7.7478				16.5793				28.0065				37.012				45.6109
		AT4R2		7.96962				17.4569				28.7303						38.4874								46.4196							7.72254				17.3549				28.6235				38.3772				46.3029
		AT4R2		8.0461				17.4899				28.3125						38.2174								45.8415							7.85452				17.3485				28.1677				38.1385				45.7269
		AT4R2		7.85006				17.4043				28.1838						38.4								46.2929							7.64115				17.2746				28.0407				38.2869				46.1659
		AT4R3		8.22756				17.4372				29.3015						39.5556								47.0231							7.98774				17.3185				29.1744				39.4954				46.9011
		AT4R3		8.31213				17.512				29.0194						39.1628								47.1387							8.1844				17.4036				28.8822				39.0338				47.0288
		AT4R3		8.38236				17.4742				29.1214						39.122								47.077							8.21384				17.3411				29.0605				38.9873				46.9584
		BT1R1		7.39425				17.9365				30.2739						41.845								50.1729							7.25726				17.8384				29.9983				41.7241				50.0591
		BT1R1		7.352				17.8659				30.1674						41.992								50.3688							7.22994				17.7448				29.871				41.8587				50.24
		BT1R1		7.27037				17.9439				30.492						42.1673								50.4423							7.19976				17.8448				30.5791				42.0553				50.3168
		BT1R2		7.30558				17.9325				30.2461						42.0599								50.3645							7.17152				17.7863				30.1232				41.9455				50.2174
		BT1R2		7.33089				17.92				30.5752						42.2378								50.505							7.20945				17.7809				30.4478				42.1074				50.3785
		BT1R2		7.4541				17.8652				30.3274						41.8151								50.0771							7.42251				17.7225				30.2174				41.6996				49.9598
		BT2R1		7.34897				17.8661				29.9172						41.4226								49.653							7.24472				17.7514				29.8153				41.308				49.5257
		BT2R1		7.26615				17.9508				30.1221						41.5079								49.669							7.15716				17.8261				29.9982				41.3793				49.5409
		BT2R1		7.33899				17.9565				29.9635						41.2121								49.4972							7.19465				17.824				29.8389				41.1024				49.3701
		BT2R2		7.39707				17.8652				29.7471						40.8955								49.1852							7.30275				17.7294				29.6425				40.7895				49.0637
		BT2R2		7.34469				17.9235				29.8726						40.902								49.0011							7.25033				17.8105				29.745				40.7792				48.8732
		BT2R2		7.28565				17.9283				29.9172						40.8889								48.9547							7.18138				17.8051				29.7941				40.7661				48.834
		BT2R3		7.61934				17.8327				29.3478						40.2857								47.3878							7.56971				17.7052				29.2288				40.15				47.2614
		BT2R3		7.55975				17.8469				29.2835						40.0917								47.2644							7.45302				17.7082				29.173				39.9556				47.1429
		BT2R3		7.77545				17.8344				29.4824						40.1485								47.2942							7.66065				17.6895				29.3468				40.0465				47.167
		BT3R1		7.37733				17.9268				29.9152						40.9959								49.2555							7.25929				17.7926				29.8008				40.8658				49.1348
		BT3R1		7.23885				17.9422				30.0398						41.2446								49.4873							7.14044				17.8281				29.9141				41.1392				49.3725
		BT3R1		7.4478				17.9679				29.8806						41.028								49.4003							7.29632				17.8237				29.7758				40.8824				49.3047
		BT3R2		7.50967				17.9293				29.6798						40.9524								49.3324							7.36891				17.7961				29.5393				40.8145				49.2181
		BT3R2		7.46274				17.9343				29.7384						40.9914								49.0211							7.36263				17.8224				29.6293				40.8811				48.9027
		BT3R2		7.4597				17.8853				29.8308						41.1111								49.1443							7.35572				17.7575				29.7028				40.9957				49.0224
		BT3R3		7.83034				17.9911				30.2048						41.9535								49.6915							7.73308				17.8782				30.0862				41.8357				49.5669
		BT3R3		7.64795				17.9227				30.1332						41.9502								49.7652							7.52505				17.822				29.998				41.8182				49.6414
		BT3R3		7.65117				17.9508				30.1662						41.7826								49.7073							7.54034				17.8395				30.0405				41.6364				49.5792
		BT4R1		7.32455				17.9186				29.9246						41.0305								49.2977							7.21341				17.7961				29.7816				40.9244				49.1753
		BT4R1		7.27023				17.931				29.8825						40.92								49.2718							7.14044				17.8344				29.7513				40.7917				49.1494
		BT4R1		7.35035				17.929				29.9152						40.902								49.1624							7.24889				17.7867				29.789				40.7755				49.0377
		BT4R2		7.49738				17.9104				29.8829						40.8741								49.2531							7.39385				17.7947				29.7748				40.7469				49.134
		BT4R2		7.40699				17.9221				29.9123						40.9717								49.2236							7.31177				17.8119				29.7816				40.8439				49.0966
		BT4R2		7.40918				17.9211				29.8747						40.9016								49.1658							7.29974				17.8108				29.7686				40.7692				49.0377
		BT4R3		7.59322				17.9675				30.1173						41.8502								49.6645							7.47885				17.8489				29.9981				41.7181				49.5344
		BT4R3		7.58749				17.9703				30.1202						41.8462								49.6062							7.46274				17.8344				29.9982				41.72				49.4747
		BT4R3		7.63495				17.9848				30.1815						41.8803								49.7868							7.51219				17.9059				30.0457				41.7373				49.664
			T1R1	8.00354	0.119122	c		17.2383	0.057437	ef		28.807	0.0451185	j				38.5873	0.228408	f						47.2073	0.328336	ef					7.7805	0.127553	cd		17.1079	0.0685365	de		28.6824	0.0454721	i		38.4642	0.22933	f		47.0851
			T2R2	8.00253	0.0848291	c		17.1495	0.126622	fg		28.8879	0.0939429	j				38.2748	0.0759475	gh						47.4891	0.380706	e					7.77022	0.0504247	cd		17.0487	0.132386	de		28.7651	0.0951267	i		38.1473	0.0883347	gh		47.3627
			AverageT1	8.00304				17.1939				28.8475						38.431								47.3482							7.77536				17.0783				28.7237				38.3057				47.2239
			T2R1	7.88956	0.0369331	c		17.1374	0.106583	fg		28.7393	0.0611531	j				38.1151	0.152246	h						46.7252	0.12798	g					7.64343	0.0927398	def		17.0133	0.114987	ef		28.6164	0.0758504	i		38.0093	0.12083	h		46.6005
			T2R2	7.90303	0.10541	c		17.045	0.0801317	g		28.6812	0.104119	j				37.205	0.161835	i						45.2378	0.220292	i					7.6927	0.114362	cde		16.924	0.0647904	f		28.5654	0.105687	i		37.0772	0.169704	i		45.1083
			T2R3	8.31133	0.0947432	b		17.2708	0.0624491	e		27.6905	0.037274	m				36.2493	0.215014	j						42.8351	0.242638	j					8.11051	0.102736	b		17.1451	0.0681522	d		27.575	0.0266205	l		36.1375	0.221078	j		42.7056
			AverageT2	8.03464				17.1511				28.3704						37.1898								44.9327							7.81554				17.0275				28.2522				37.0747				44.8048
			T3R1	7.93603	0.0930094	c		16.7317	0.151049	h		28.2751	0.145339	kl				37.0595	0.0463823	i						46.2065	0.230521	h					7.70525	0.0745581	cde		16.6204	0.166264	g		28.1352	0.153824	jk		36.9292	0.0496803	i		46.0897
			T3R2	8.01758	0.20655	c		17.4235	0.07252	d		28.6989	0.098724	j				38.2845	0.0845624	gh						47.326	0.349405	ef					7.84308	0.202398	c		17.3047	0.0760084	c		28.5766	0.100813	i		38.1685	0.0914653	gh		47.1995
			T3R3	8.6256	0.0893877	a		17.5529	0.0911719	c		29.6009	0.14897	g				39.3312	0.0648201	e						46.3576	0.328861	h					8.41332	0.0522605	a		17.4268	0.0837518	c		29.4954	0.150068	h		39.2084	0.0658347	e		46.2345
			AverageT3	8.19307				17.236				28.8583						38.2251								46.63							7.98722				17.1173				28.7357				38.1021				46.5079
			T4R1	7.98712	0.137747	c		16.7577	0.0329119	h		28.1473	0.0907393	l				37.2376	0.179891	i						46.1294	0.377234	h					7.76156	0.218974	cd		16.6314	0.0457079	g		28.021	0.0847612	k		37.1187	0.166558	i		46.0074
			T4R2	7.95526	0.0988041	c		17.4503	0.0431861	cd		28.4089	0.285729	k				38.3683	0.137771	fg						46.1847	0.303873	h					7.7394	0.107682	cde		17.326	0.0446175	c		28.2773	0.306484	j		38.2675	0.120501	fg		46.0652
			T4R3	8.30735	0.077511	b		17.4745	0.0373884	cd		29.1474	0.142821	i				39.2801	0.239425	e						47.0796	0.0578481	fg					8.12866	0.122924	b		17.3544	0.0440828	c		29.039	0.147255	i		39.1722	0.280882	e		46.9628
			AverageT4	8.08324				17.2275				28.5679						38.2953								46.4645							7.87654				17.1039				28.4458				38.1861				46.3451
			T1R1	7.33887	0.0629707	f		17.9154	0.0430933	ab		30.3111	0.165466	ab				42.0015	0.161347	a						50.328	0.139264	a					7.22899	0.028761	h		17.8093	0.0559563	ab		30.1495	0.377474	ab		41.8794	0.166563	a		50.2053
			T2R2	7.36352	0.0794596	f		17.9059	0.035811	ab		30.3829	0.171436	a				42.0376	0.212231	a						50.3155	0.2181	a					7.26783	0.135297	h		17.7633	0.0353823	ab		30.2628	0.167007	a		41.9175	0.205354	a		50.1852
			AverageT1	7.3512				17.9107				30.347						42.0195								50.3218							7.24841				17.7863				30.2061				41.8985				50.1953
			T2R1	7.31804	0.0452139	f		17.9245	0.0506342	ab		30.001	0.107467	cde				41.3809	0.152255	b						49.6064	0.0949122	bc					7.19884	0.04393	h		17.8005	0.0425329	ab		29.8841	0.0994566	cde		41.2632	0.143804	b		49.4789
			T2R2	7.34247	0.0557418	f		17.9057	0.0351404	ab		29.8457	0.0882154	ef				40.8955	0.00653619	c						49.047	0.121924	d					7.24482	0.0608748	h		17.7817	0.0453273	ab		29.7272	0.077365	efg		40.7783	0.0117011	c		48.9237
			T2R3	7.65151	0.11139	d		17.838	0.0077499	b		29.3712	0.101502	h				40.1753	0.0997259	d						47.3155	0.0643752	ef					7.56113	0.104083	ef		17.701	0.010053	b		29.2495	0.0887375	h		40.0507	0.0972895	d		47.1904
			AverageT2	7.43734				17.8894				29.7393						40.8172								48.6563							7.33493				17.761				29.6203				40.6974				48.531
			T3R1	7.35466	0.106303	f		17.9457	0.0207553	ab		29.9452	0.0837433	def				41.0895	0.135305	c						49.381	0.117107	bcd					7.23202	0.0814405	h		17.8148	0.0193459	ab		29.8302	0.0737027	cdef		40.9625	0.153316	c		49.2707
			T3R2	7.47737	0.0280162	ef		17.9163	0.0269493	ab		29.7497	0.0761202	fg				41.0183	0.0827162	c						49.1659	0.15681	d					7.36242	0.00659803	gh		17.792	0.0326536	ab		29.6238	0.0818991	fg		40.8971	0.0916508	c		49.0477
			T3R3	7.70982	0.104387	d		17.9549	0.0343622	ab		30.1681	0.0358554	bc				41.8954	0.0977241	a						49.7213	0.0388281	b					7.59949	0.115943	def		17.8466	0.0287226	a		30.0416	0.0440931	abc		41.7634	0.110394	a		49.5958
			AverageT3	7.51395				17.9389				29.9543						41.3344								49.4228							7.39798				17.8178				29.8319				41.2077				49.3047
			T4R1	7.31504	0.0409005	f		17.9262	0.00669591	ab		29.9074	0.022103	ef				40.9508	0.0696113	c						49.244	0.0718478	cd					7.20091	0.0552941	h		17.8058	0.0252585	ab		29.774	0.0199807	def		40.8305	0.0816806	c		49.1208
			T4R2	7.43785	0.0515683	f		17.9179	0.00646271	ab		29.89	0.01974	ef				40.9158	0.0502871	c						49.2142	0.0444419	d					7.33512	0.0512147	gh		17.8058	0.00959958	ab		29.775	0.00651309	def		40.7867	0.0507934	c		49.0894
			T4R3	7.60522	0.025903	de		17.9742	0.00928876	a		30.1396	0.0362488	bcd				41.8589	0.0186756	a						49.6858	0.0921659	b					7.48459	0.0252202	fg		17.8631	0.0377894	a		30.014	0.0274655	bc		41.7251	0.0105853	a		49.5577
			AverageT4	7.4527				17.9394				29.979						41.2418								49.3813							7.34021				17.8249				29.8543				41.1141				49.256
						c				ef				j						f								ef							cd				de				i				f
						c				fg				j						gh								e							cd				de				i				gh
						c				fg				j						h								g							def				ef				i				h
						c				g				j						i								i							cde				f				i				i
						b				e				m						j								j							b				d				l				j
						c				h				kl						i								h							cde				g				jk				i
						c				d				j						gh								ef							c				c				i				gh
						a				c				g						e								h							a				c				h				e
						c				h				l						i								h							cd				g				k				i
						c				cd				k						fg								h							cde				c				j				fg
						b				cd				i						e								fg							b				c				i				e
						f				ab				ab						a								a							h				ab				ab				a
						f				ab				a						a								a							h				ab				a				a
						f				ab				cde						b								bc							h				ab				cde				b
						f				ab				ef						c								d							h				ab				efg				c
						d				b				h						d								ef							ef				b				h				d
						f				ab				def						c								bcd							h				ab				cdef				c
						ef				ab				fg						c								d							gh				ab				fg				c
						d				ab				bc						a								b							def				a				abc				a
						f				ab				ef						c								cd							h				ab				def				c
						f				ab				ef						c								d							gh				ab				def				c
						de				a				bcd						a								b							fg				a				bc				a
						5.08386				13.9796				24.8996								32.446								39.287					4.99585				13.8492				24.8265				32.3529
						5.03429				13.4646				24.9084								32.5962								40.3881					4.95648				13.3781				24.8072				32.5287
						4.9535				13.4234				24.8509								32.5882								40.5397					4.82379				13.3289				24.8265				32.625
						5.04903				13.8281				24.8974								32.2619								40.5028					4.90151				13.7454				24.7826				32.1348
						5.16736				13.4483				24.7335								32.439								40.7671					4.99542				13.3612				24.6691				32.4096
						4.99371				13.0968				24.9255								32.3596								40.0954					4.89347				12.9423				24.7623				32.2826
						4.87571				13.7755				24.1275								32.4359								39.1348					4.7445				13.6215				24.0579				32.3171
						5.05922				13.2759				24.4654								32.5962								39.6293					4.93446				13.1216				24.3156				32.4242
						5.06247				13.4899				24.1275								32.5743								38.2806					4.88136				13.3781				23.9706				32.4096
						5.22227				13.2308				24.0371								31.8462								37.9751					5.05241				13.1416				23.9416				31.6867
						4.99405				13.4211				23.9233								31.9828								37.4974					4.86263				13.3005				23.8296				31.9048
						5.04183				13.75				24.1792								31.2857								37.7274					4.93888				13.6412				24.0179				31.1236
						5.72747				13.622				22.5589								29.2308								33.4612					5.63921				13.5144				22.4337				29.186
						5.59				13.9216				22.3153								29.4937								33.7385					5.46				13.8321				22.1376				29.4565
						5.69256				13.1429				22.326								29.1837								33.4934					5.51625				13.0387				22.1675				29.0805
						5.13117				12.0652				23.2505								31.3978								37.6087					5.0563				11.9308				23.1533				31.3043
						5.06806				12.3684				23.2044								31.5929								38.7975					4.92116				12.2635				23.0713				31.5054
						4.99154				12.1429				23.1713								31.6495								38.2733					4.86615				12.0137				23.0536				31.4894
						4.95099				14.6154				24.884								32.6214								40.4165					4.99463				14.5004				24.7567				32.4742
						5.23094				14.0141				24.7463								32.7586								40.4068					5.1636				13.8638				24.6035				32.6829
						5.05241				13.964				24.7941								32.1918								39.8812					4.94022				13.8277				24.646				32.0253
						5.72327				14.5588				24.9572								33.8983								38.9425					5.60776				14.4853				24.8408				33.8372
						5.8281				14.3373				24.9908								33.5556								38.157					5.85701				14.2343				24.814				33.4568
						5.71059				14.3609				24.9108								33.2727								37.7413					5.60336				14.2015				24.8094				33.1646
						4.995				12.069				23.065								31.3793								37.9636					4.84404				11.9147				22.9547				31.2195
						4.936				12.5203				23.2085								31.7197								37.442					4.80456				12.3996				23.0564				31.6038
						5.14938				11.9388				23.0054								31.6667								37.2963					4.99488				12.0383				23.0162				31.5663
						4.99436				14.1803				24.5501								32.8								39.7101					4.8786				14.0734				24.3833				32.6744
						4.99476				14.1401				24.4248								32.2826								39.0478					4.82253				14.108				24.2805				32.2222
						5.07238				14.2683				24.3218								32.1875								38.6261					5.0563				14.1524				24.1809				32.0833
						5.2959				14.3056				24.855								32.6667								39.3195					5.23854				14.1809				24.7623				32.5581
						5.30979				14.3243				24.9919								32.8947								38.8084					5.1843				14.2647				24.8626				32.8395
						5.3695				14.4286				24.8933								32.8205								38.8611					5.21101				14.3254				24.8046				32.6506
						4.38211				13.8614				25.4509								34.6099								42.7717					4.23012				13.7101				25.2842				34.4853
						4.30941				13.8043				25.3818								34.6528								42.9053					4.13287				13.6473				25.281				34.5238
						4.45008				13.8211				25.3683								34.4737								42.6201					4.34778				13.7251				25.2505				34.4037
						4.31205				13.8158				25.2508								34.4828								42.7042					4.22034				13.6925				25.1471				34.4068
						4.3695				13.8235				25.2912								34.3478								42.5077					4.22227				13.7363				25.1533				34.2063
						4.28088				13.8356				25.4375								34.5806								42.7908					4.11247				13.7342				25.2789				34.4355
						4.28241				13.8571				25.2737								34.6296								42.7805					4.18629				13.7212				25.2081				34.537
						4.35208				13.7415				25.0512								34.863								42.6754					4.2015				13.669				24.9949				34.7748
						4.30276				13.8333				25.1193								34.7619								42.4886					4.22227				13.7101				25.0443				34.6825
						4.37753				13.7572				24.9461								34.1228								42.0474					4.29721				13.6496				24.7914				34.0367
						4.38488				13.8462				24.996								34.5055								42.2654					4.24782				13.7329				24.8786				34.3434
						4.36159				13.8261				24.9572								34.5255								42.0382					4.22227				13.7068				24.8303				34.4094
						4.58735				13.7063				24.5046								33.1884								40.1221					4.41642				13.5437				24.3884				33.1304
						4.65933				13.7838				24.5114								33.2432								40.2886					4.59264				13.7158				24.3647				33.1034
						4.66913				13.6111				24.6497								33.1034								40.0397					4.61055				13.4471				24.5575				32.963
						4.37107				13.8542				25.3605								34.3299								42.1982					4.29721				13.6909				25.2274				34.2308
						4.34145				13.8217				25.2081								34.2975								42.3536					4.21157				13.7329				25.0501				34.1379
						4.23027				13.8017				25.1505								34.3396								42.4779					4.17918				13.6407				25.0434				34.2574
						4.4956				13.7879				25.0549								34.058								42.6703					4.41349				13.6731				24.9439				33.9394
						4.42682				13.8129				25.2574								34.0449								42.1144					4.29634				13.6532				25.1112				33.9423
						4.37042				13.8168				25.3663								34.0566								42.4262					4.26293				13.6804				25.2432				33.9604
						4.68593				13.8947				25.5318								34.5312								42.0141					4.51857				13.8192				25.3716				34.375
						4.70731				13.8679				25.6181								34.5098								42.0995					4.61892				13.7821				25.46				34.433
						4.72645				13.8953				25.6044								34.5882								42.3698					4.63762				13.7565				25.4824				34.4578
						4.36276				13.8235				25.1934								34.2963								42.1559					4.28088				13.6715				25.0771				34.1748
						4.39963				13.8136				25.2463								34.3307								42.4148					4.24782				13.685				25.0919				34.1964
						4.20667				13.8095				25.1845								34.1566								42.1353					4.12565				13.7251				25.0397				34.0373
						4.42981				13.8129				25.1603								34.2143								42.2157					4.26625				13.7267				25.047				34.0945
						4.50683				13.8095				25.049								34.0909								42.0714					4.41349				13.7251				24.884				34
						4.43096				13.8095				25.1442								34.106								42.1793					4.35208				13.6684				24.9958				33.9706
						4.6018				13.8854				25.5047								34.2105								41.7104					4.4777				13.7466				25.3875				34.0404
						4.55067				13.8889				25.4594								34.2857								41.8164					4.45174				13.7569				25.3878				34.2105
						4.61849				13.8953				25.5346								34.3478								41.9088					4.46175				13.8027				25.3883				34.1818
					T1R1	5.02388	0.0657973	c		13.6225	0.30991	cd		24.8863	0.0310067	g						32.5435	0.0844734	gh						40.0716	0.683691	c			4.92537	0.0901471	de		13.5187	0.28723	de		24.8201	0.01117	fgh		32.5022	0.137953	gh
					T2R2	5.07003	0.0887057	c		13.4577	0.365767	d		24.8521	0.10366	g						32.3535	0.088715	h						40.4551	0.338382	c			4.93013	0.0566811	de		13.3496	0.401669	e		24.738	0.0604969	gh		32.2757	0.137534	h
					AverageT1	5.04696				13.5401				24.8692								32.4485								40.2634					4.92775				13.4342				24.779				32.389
					T2R1	4.99913	0.106897	c		13.5138	0.250675	cd		24.2401	0.195113	i						32.5354	0.0868956	gh						39.0149	0.68228	d			4.85344	0.098009	e		13.3737	0.250017	e		24.1147	0.179348	k		32.3837	0.0581189	gh
					T2R2	5.08605	0.120364	c		13.4673	0.262683	d		24.0466	0.128185	j						31.7049	0.369374	i						37.7333	0.238862	ef			4.95131	0.0954998	de		13.3611	0.255273	e		23.9297	0.0947313	l		31.5717	0.40309	i
					T2R3	5.67001	0.0714538	a		13.5622	0.392795	cd		22.4001	0.137618	l						29.3027	0.16705	j						33.5644	0.151665	g			5.53849	0.0916499	b		13.4617	0.399315	de		22.2463	0.16297	n		29.241	0.193962	j
					AverageT2	5.25173				13.5144				23.5622								31.181								36.7709					5.11441				13.3989				23.4302				31.0655
					T3R1	5.06359	0.0699236	c		12.1922	0.157501	e		23.2087	0.0397653	k						31.5468	0.132018	i						38.2265	0.595792	e			4.94787	0.0978449	de		12.0693	0.173211	f		23.0927	0.053159	m		31.433	0.111728	i
					T3R2	5.07811	0.141732	c		14.1978	0.362497	ab		24.8082	0.0698963	g						32.5239	0.295715	gh						40.2348	0.306319	c			5.03282	0.11648	d		14.0639	0.37841	abc		24.6687	0.0790522	h		32.3942	0.336038	gh
					T3R3	5.75399	0.0644936	a		14.419	0.12164	a		24.9529	0.0401739	g						33.5755	0.313267	e						38.2803	0.610004	e			5.68938	0.145192	a		14.307	0.155246	a		24.8214	0.0169831	fgh		33.4862	0.337288	e
					AverageT3	5.29856				13.603				24.3233								32.5487								38.9139					5.22335				13.4801				24.1943				32.4378
					T4R1	5.02679	0.110183	c		12.176	0.305198	e		23.093	0.104371	k						31.5886	0.183161	i						37.5673	0.350853	f			4.88116	0.100446	de		12.1175	0.251966	f		23.0091	0.0512354	m		31.4632	0.211857	i
					T4R2	5.0205	0.0449301	c		14.1962	0.0655493	ab		24.4322	0.114335	h						32.4234	0.32962	h						39.128	0.546458	d			4.91914	0.122042	de		14.1113	0.0395796	ab		24.2816	0.101172	j		32.3267	0.309072	h
					T4R3	5.32506	0.0391041	b		14.3528	0.066273	a		24.9134	0.0705972	g						32.794	0.116328	g						38.9964	0.281116	d			5.21128	0.0271174	c		14.257	0.0725238	a		24.8098	0.0503611	gh		32.6827	0.143412	g
					AverageT4	5.12412				13.575				24.1462								32.2686								38.5639					5.00386				13.4953				24.0335				32.1575
					T1R1	4.38053	0.0703493	ef		13.829	0.0293121	cd		25.4003	0.0443283	bc						34.5788	0.0935175	ab						42.7657	0.142694	a			4.23692	0.107614	h		13.6942	0.0412673	cde		25.2719	0.0186012	bc		34.4709	0.0613454	ab
					T2R2	4.32081	0.0449547	ef		13.825	0.00999259	cd		25.3265	0.0982147	cd						34.4704	0.1169	ab						42.6676	0.145045	a			4.18503	0.0628438	h		13.721	0.0247141	cde		25.1931	0.07437	cd		34.3495	0.124833	abc
					AverageT1	4.35067				13.827				25.3634								34.5246								42.7166					4.21098				13.7076				25.2325				34.4102
					T2R1	4.31241	0.0358262	f		13.8107	0.0610668	cd		25.1481	0.113996	e						34.7515	0.117038	a						42.6482	0.147861	a			4.20335	0.0180627	h		13.7001	0.0275009	cde		25.0824	0.111601	de		34.6648	0.119859	a
					T2R2	4.37467	0.0119072	ef		13.8098	0.046642	cd		24.9664	0.0261912	fg						34.3846	0.226955	bc						42.117	0.128609	ab			4.25576	0.0380976	h		13.6964	0.0426112	cde		24.8335	0.043672	fg		34.2632	0.198909	bcd
					T2R3	4.6386	0.044659	d		13.7004	0.0864873	cd		24.5552	0.0818976	h						33.1784	0.0704362	f						40.1501	0.126821	c			4.53987	0.107285	f		13.5689	0.136099	de		24.4369	0.105178	i		33.0656	0.0899177	f
					AverageT2	4.44189				13.7736				24.8899								34.1048								41.6384					4.333				13.6551				24.7842				33.9979
					T3R1	4.31426	0.074233	f		13.8258	0.026504	cd		25.2397	0.108519	cde						34.3223	0.0220431	bcd						42.3432	0.140109	ab			4.22932	0.0609828	h		13.6882	0.0461495	de		25.107	0.104365	de		34.2087	0.0627276	bcd
					T3R2	4.43094	0.0626936	ef		13.8059	0.0157025	cd		25.2262	0.158001	de						34.0532	0.00715928	d						42.4036	0.27865	ab			4.32425	0.0790657	gh		13.6689	0.0140748	de		25.0994	0.149971	de		33.9474	0.0113781	d
					T3R3	4.70656	0.0202731	d		13.886	0.0156598	bc		25.5848	0.0463942	a						34.5431	0.0405355	ab						42.1611	0.185707	ab			4.59171	0.0640216	f		13.7859	0.0315407	bcd		25.438	0.0585921	a		34.4219	0.0425067	ab
					AverageT3	4.48392				13.8392				25.3502								34.3062								42.3026					4.38176				13.7143				25.2148				34.1927
					T4R1	4.32302	0.102437	ef		13.8155	0.00720931	cd		25.2081	0.0334209	de						34.2612	0.0921922	bcd						42.2353	0.155788	ab			4.21812	0.0817645	h		13.6939	0.027881	cde		25.0696	0.0269387	de		34.1362	0.0863188	bcd
					T4R2	4.45587	0.0441395	e		13.8107	0.0019779	cd		25.1178	0.0601348	ef						34.1371	0.0673087	cd						42.1555	0.0750608	ab			4.34394	0.0739559	gh		13.7067	0.0331714	cde		24.9756	0.0833667	ef		34.0217	0.0647357	cd
					T4R3	4.59032	0.0353391	d		13.8899	0.00506989	bc		25.4996	0.0378724	ab						34.2814	0.0687536	bcd						41.8119	0.0992946	b			4.46373	0.013094	fg		13.7687	0.0298651	bcd		25.3879	0.000419304	ab		34.1442	0.0910711	bcd
					AverageT4	4.4564				13.8387				25.2752								34.2265								42.0676					4.34193				13.7231				25.1444				34.1007
								c				cd				g								gh								c					de				de				fgh				gh
								c				d				g								h								c					de				e				gh				h
								c				cd				i								gh								d					e				e				k				gh
								c				d				j								i								ef					de				e				l				i
								a				cd				l								j								g					b				de				n				j
								c				e				k								i								e					de				f				m				i
								c				ab				g								gh								c					d				abc				h				gh
								a				a				g								e								e					a				a				fgh				e
								c				e				k								i								f					de				f				m				i
								c				ab				h								h								d					de				ab				j				h
								b				a				g								g								d					c				a				gh				g
								ef				cd				bc								ab								a					h				cde				bc				ab
								ef				cd				cd								ab								a					h				cde				cd				abc
								f				cd				e								a								a					h				cde				de				a
								ef				cd				fg								bc								ab					h				cde				fg				bcd
								d				cd				h								f								c					f				de				i				f
								f				cd				cde								bcd								ab					h				de				de				bcd
								ef				cd				de								d								ab					gh				de				de				d
								d				bc				a								ab								ab					f				bcd				a				ab
								ef				cd				de								bcd								ab					h				cde				de				bcd
								e				cd				ef								cd								ab					gh				cde				ef				cd
								d				bc				ab								bcd								b					fg				bcd				ab				bcd
					T1R1	8.00354	0.119122	c	17.2383	0.057437	ef	28.807	0.0451185	j	38.5873	0.228408	f	47.2073	0.328336	ef
					T2R2	8.00253	0.0848291	c	17.1495	0.126622	fg	28.8879	0.0939429	j	38.2748	0.0759475	gh	47.4891	0.380706	e
					AverageT1	8.00304			17.1939			28.8475			38.431			47.3482
					T2R1	7.88956	0.0369331	c	17.1374	0.106583	fg	28.7393	0.0611531	j	38.1151	0.152246	h	46.7252	0.12798	g
					T2R2	7.90303	0.10541	c	17.045	0.0801317	g	28.6812	0.104119	j	37.205	0.161835	i	45.2378	0.220292	i
					T2R3	8.31133	0.0947432	b	17.2708	0.0624491	e	27.6905	0.037274	m	36.2493	0.215014	j	42.8351	0.242638	j
					AverageT2	8.03464			17.1511			28.3704			37.1898			44.9327
					T3R1	7.93603	0.0930094	c	16.7317	0.151049	h	28.2751	0.145339	kl	37.0595	0.0463823	i	46.2065	0.230521	h
					T3R2	8.01758	0.20655	c	17.4235	0.07252	d	28.6989	0.098724	j	38.2845	0.0845624	gh	47.326	0.349405	ef
					T3R3	8.6256	0.0893877	a	17.5529	0.0911719	c	29.6009	0.14897	g	39.3312	0.0648201	e	46.3576	0.328861	h
					AverageT3	8.19307			17.236			28.8583			38.2251			46.63
					T4R1	7.98712	0.137747	c	16.7577	0.0329119	h	28.1473	0.0907393	l	37.2376	0.179891	i	46.1294	0.377234	h
					T4R2	7.95526	0.0988041	c	17.4503	0.0431861	cd	28.4089	0.285729	k	38.3683	0.137771	fg	46.1847	0.303873	h
					T4R3	8.30735	0.077511	b	17.4745	0.0373884	cd	29.1474	0.142821	i	39.2801	0.239425	e	47.0796	0.0578481	fg
					AverageT4	8.08324			17.2275			28.5679			38.2953			46.4645
					T1R1	7.33887	0.0629707	f	17.9154	0.0430933	ab	30.3111	0.165466	ab	42.0015	0.161347	a	50.328	0.139264	a
					T2R2	7.36352	0.0794596	f	17.9059	0.035811	ab	30.3829	0.171436	a	42.0376	0.212231	a	50.3155	0.2181	a
					AverageT1	7.3512			17.9107			30.347			42.0195			50.3218
					T2R1	7.31804	0.0452139	f	17.9245	0.0506342	ab	30.001	0.107467	cde	41.3809	0.152255	b	49.6064	0.0949122	bc
					T2R2	7.34247	0.0557418	f	17.9057	0.0351404	ab	29.8457	0.0882154	ef	40.8955	0.00653619	c	49.047	0.121924	d
					T2R3	7.65151	0.11139	d	17.838	0.0077499	b	29.3712	0.101502	h	40.1753	0.0997259	d	47.3155	0.0643752	ef
					AverageT2	7.43734			17.8894			29.7393			40.8172			48.6563
					T3R1	7.35466	0.106303	f	17.9457	0.0207553	ab	29.9452	0.0837433	def	41.0895	0.135305	c	49.381	0.117107	bcd
					T3R2	7.47737	0.0280162	ef	17.9163	0.0269493	ab	29.7497	0.0761202	fg	41.0183	0.0827162	c	49.1659	0.15681	d
					T3R3	7.70982	0.104387	d	17.9549	0.0343622	ab	30.1681	0.0358554	bc	41.8954	0.0977241	a	49.7213	0.0388281	b
					AverageT3	7.51395			17.9389			29.9543			41.3344			49.4228
					T4R1	7.31504	0.0409005	f	17.9262	0.00669591	ab	29.9074	0.022103	ef	40.9508	0.0696113	c	49.244	0.0718478	cd
					T4R2	7.43785	0.0515683	f	17.9179	0.00646271	ab	29.89	0.01974	ef	40.9158	0.0502871	c	49.2142	0.0444419	d
					T4R3	7.60522	0.025903	de	17.9742	0.00928876	a	30.1396	0.0362488	bcd	41.8589	0.0186756	a	49.6858	0.0921659	b
					AverageT4	7.4527			17.9394			29.979			41.2418			49.3813
					T1R1	7.7805	0.127553	cd	17.1079	0.0685365	de	28.6824	0.0454721	i	38.4642	0.22933	f	47.0851	0.329403	ef
					T2R2	7.77022	0.0504247	cd	17.0487	0.132386	de	28.7651	0.0951267	i	38.1473	0.0883347	gh	47.3627	0.378346	e
					AverageT1	7.77536			17.0783			28.7237			38.3057			47.2239
					T2R1	7.64343	0.0927398	def	17.0133	0.114987	ef	28.6164	0.0758504	i	38.0093	0.12083	h	46.6005	0.132964	g
					T2R2	7.6927	0.114362	cde	16.924	0.0647904	f	28.5654	0.105687	i	37.0772	0.169704	i	45.1083	0.224164	i
					T2R3	8.11051	0.102736	b	17.1451	0.0681522	d	27.575	0.0266205	l	36.1375	0.221078	j	42.7056	0.243131	j
					AverageT2	7.81554			17.0275			28.2522			37.0747			44.8048
					T3R1	7.70525	0.0745581	cde	16.6204	0.166264	g	28.1352	0.153824	jk	36.9292	0.0496803	i	46.0897	0.225111	h
					T3R2	7.84308	0.202398	c	17.3047	0.0760084	c	28.5766	0.100813	i	38.1685	0.0914653	gh	47.1995	0.346417	ef
					T3R3	8.41332	0.0522605	a	17.4268	0.0837518	c	29.4954	0.150068	h	39.2084	0.0658347	e	46.2345	0.333669	h
					AverageT3	7.98722			17.1173			28.7357			38.1021			46.5079
					T4R1	7.76156	0.218974	cd	16.6314	0.0457079	g	28.021	0.0847612	k	37.1187	0.166558	i	46.0074	0.38152	h
					T4R2	7.7394	0.107682	cde	17.326	0.0446175	c	28.2773	0.306484	j	38.2675	0.120501	fg	46.0652	0.300923	h
					T4R3	8.12866	0.122924	b	17.3544	0.0440828	c	29.039	0.147255	i	39.1722	0.280882	e	46.9628	0.0639744	f
					AverageT4	7.87654			17.1039			28.4458			38.1861			46.3451
					T1R1	7.22899	0.028761	h	17.8093	0.0559563	ab	30.1495	0.377474	ab	41.8794	0.166563	a	50.2053	0.132346	a
					T2R2	7.26783	0.135297	h	17.7633	0.0353823	ab	30.2628	0.167007	a	41.9175	0.205354	a	50.1852	0.211167	a
					AverageT1	7.24841			17.7863			30.2061			41.8985			50.1953
					T2R1	7.19884	0.04393	h	17.8005	0.0425329	ab	29.8841	0.0994566	cde	41.2632	0.143804	b	49.4789	0.0945457	bc
					T2R2	7.24482	0.0608748	h	17.7817	0.0453273	ab	29.7272	0.077365	efg	40.7783	0.0117011	c	48.9237	0.122895	d
					T2R3	7.56113	0.104083	ef	17.701	0.010053	b	29.2495	0.0887375	h	40.0507	0.0972895	d	47.1904	0.0626479	ef
					AverageT2	7.33493			17.761			29.6203			40.6974			48.531
					T3R1	7.23202	0.0814405	h	17.8148	0.0193459	ab	29.8302	0.0737027	cdef	40.9625	0.153316	c	49.2707	0.122433	bcd
					T3R2	7.36242	0.00659803	gh	17.792	0.0326536	ab	29.6238	0.0818991	fg	40.8971	0.0916508	c	49.0477	0.159226	d
					T3R3	7.59949	0.115943	def	17.8466	0.0287226	a	30.0416	0.0440931	abc	41.7634	0.110394	a	49.5958	0.0399559	b
					AverageT3	7.39798			17.8178			29.8319			41.2077			49.3047
					T4R1	7.20091	0.0552941	h	17.8058	0.0252585	ab	29.774	0.0199807	def	40.8305	0.0816806	c	49.1208	0.0731269	cd
					T4R2	7.33512	0.0512147	gh	17.8058	0.00959958	ab	29.775	0.00651309	def	40.7867	0.0507934	c	49.0894	0.0485836	cd
					T4R3	7.48459	0.0252202	fg	17.8631	0.0377894	a	30.014	0.0274655	bc	41.7251	0.0105853	a	49.5577	0.0967725	b
					AverageT4	7.34021			17.8249			29.8543			41.1141			49.256
					T1R1	5.02388	0.0657973	c	13.6225	0.30991	cd	24.8863	0.0310067	g	32.5435	0.0844734	gh	40.0716	0.683691	c
					T2R2	5.07003	0.0887057	c	13.4577	0.365767	d	24.8521	0.10366	g	32.3535	0.088715	h	40.4551	0.338382	c
					AverageT1	5.04696			13.5401			24.8692			32.4485			40.2634
					T2R1	4.99913	0.106897	c	13.5138	0.250675	cd	24.2401	0.195113	i	32.5354	0.0868956	gh	39.0149	0.68228	d
					T2R2	5.08605	0.120364	c	13.4673	0.262683	d	24.0466	0.128185	j	31.7049	0.369374	i	37.7333	0.238862	ef
					T2R3	5.67001	0.0714538	a	13.5622	0.392795	cd	22.4001	0.137618	l	29.3027	0.16705	j	33.5644	0.151665	g
					AverageT2	5.25173			13.5144			23.5622			31.181			36.7709
					T3R1	5.06359	0.0699236	c	12.1922	0.157501	e	23.2087	0.0397653	k	31.5468	0.132018	i	38.2265	0.595792	e
					T3R2	5.07811	0.141732	c	14.1978	0.362497	ab	24.8082	0.0698963	g	32.5239	0.295715	gh	40.2348	0.306319	c
					T3R3	5.75399	0.0644936	a	14.419	0.12164	a	24.9529	0.0401739	g	33.5755	0.313267	e	38.2803	0.610004	e
					AverageT3	5.29856			13.603			24.3233			32.5487			38.9139
					T4R1	5.02679	0.110183	c	12.176	0.305198	e	23.093	0.104371	k	31.5886	0.183161	i	37.5673	0.350853	f
					T4R2	5.0205	0.0449301	c	14.1962	0.0655493	ab	24.4322	0.114335	h	32.4234	0.32962	h	39.128	0.546458	d
					T4R3	5.32506	0.0391041	b	14.3528	0.066273	a	24.9134	0.0705972	g	32.794	0.116328	g	38.9964	0.281116	d
					AverageT4	5.12412			13.575			24.1462			32.2686			38.5639
					T1R1	4.38053	0.0703493	ef	13.829	0.0293121	cd	25.4003	0.0443283	bc	34.5788	0.0935175	ab	42.7657	0.142694	a
					T2R2	4.32081	0.0449547	ef	13.825	0.00999259	cd	25.3265	0.0982147	cd	34.4704	0.1169	ab	42.6676	0.145045	a
					AverageT1	4.35067			13.827			25.3634			34.5246			42.7166
					T2R1	4.31241	0.0358262	f	13.8107	0.0610668	cd	25.1481	0.113996	e	34.7515	0.117038	a	42.6482	0.147861	a
					T2R2	4.37467	0.0119072	ef	13.8098	0.046642	cd	24.9664	0.0261912	fg	34.3846	0.226955	bc	42.117	0.128609	ab
					T2R3	4.6386	0.044659	d	13.7004	0.0864873	cd	24.5552	0.0818976	h	33.1784	0.0704362	f	40.1501	0.126821	c
					AverageT2	4.44189			13.7736			24.8899			34.1048			41.6384
					T3R1	4.31426	0.074233	f	13.8258	0.026504	cd	25.2397	0.108519	cde	34.3223	0.0220431	bcd	42.3432	0.140109	ab
					T3R2	4.43094	0.0626936	ef	13.8059	0.0157025	cd	25.2262	0.158001	de	34.0532	0.00715928	d	42.4036	0.27865	ab
					T3R3	4.70656	0.0202731	d	13.886	0.0156598	bc	25.5848	0.0463942	a	34.5431	0.0405355	ab	42.1611	0.185707	ab
					AverageT3	4.48392			13.8392			25.3502			34.3062			42.3026
					T4R1	4.32302	0.102437	ef	13.8155	0.00720931	cd	25.2081	0.0334209	de	34.2612	0.0921922	bcd	42.2353	0.155788	ab
					T4R2	4.45587	0.0441395	e	13.8107	0.0019779	cd	25.1178	0.0601348	ef	34.1371	0.0673087	cd	42.1555	0.0750608	ab
					T4R3	4.59032	0.0353391	d	13.8899	0.00506989	bc	25.4996	0.0378724	ab	34.2814	0.0687536	bcd	41.8119	0.0992946	b
					AverageT4	4.4564			13.8387			25.2752			34.2265			42.0676
					T1R1	4.92537	0.0901471	de	13.5187	0.28723	de	24.8201	0.01117	fgh	32.5022	0.137953	gh	39.9426	0.691078	c
					T2R2	4.93013	0.0566811	de	13.3496	0.401669	e	24.738	0.0604969	gh	32.2757	0.137534	h	40.3319	0.318446	c
					AverageT1	4.92775			13.4342			24.779			32.389			40.1373
					T2R1	4.85344	0.098009	e	13.3737	0.250017	e	24.1147	0.179348	k	32.3837	0.0581189	gh	38.8914	0.658149	d
					T2R2	4.95131	0.0954998	de	13.3611	0.255273	e	23.9297	0.0947313	l	31.5717	0.40309	i	37.6252	0.222381	ef
					T2R3	5.53849	0.0916499	b	13.4617	0.399315	de	22.2463	0.16297	n	29.241	0.193962	j	33.4268	0.146712	g
					AverageT2	5.11441			13.3989			23.4302			31.0655			36.6478
					T3R1	4.94787	0.0978449	de	12.0693	0.173211	f	23.0927	0.053159	m	31.433	0.111728	i	38.0999	0.588672	e
					T3R2	5.03282	0.11648	d	14.0639	0.37841	abc	24.6687	0.0790522	h	32.3942	0.336038	gh	40.1221	0.307173	c
					T3R3	5.68938	0.145192	a	14.307	0.155246	a	24.8214	0.0169831	fgh	33.4862	0.337288	e	38.1518	0.61789	e
					AverageT3	5.22335			13.4801			24.1943			32.4378			38.7913
					T4R1	4.88116	0.100446	de	12.1175	0.251966	f	23.0091	0.0512354	m	31.4632	0.211857	i	37.4473	0.364405	f
					T4R2	4.91914	0.122042	de	14.1113	0.0395796	ab	24.2816	0.101172	j	32.3267	0.309072	h	39.0022	0.545169	d
					T4R3	5.21128	0.0271174	c	14.257	0.0725238	a	24.8098	0.0503611	gh	32.6827	0.143412	g	38.8645	0.25418	d
					AverageT4	5.00386			13.4953			24.0335			32.1575			38.438
					T1R1	4.23692	0.107614	h	13.6942	0.0412673	cde	25.2719	0.0186012	bc	34.4709	0.0613454	ab	42.6364	0.137775	a
					T2R2	4.18503	0.0628438	h	13.721	0.0247141	cde	25.1931	0.07437	cd	34.3495	0.124833	abc	42.5534	0.147327	a
					AverageT1	4.21098			13.7076			25.2325			34.4102			42.5949
					T2R1	4.20335	0.0180627	h	13.7001	0.0275009	cde	25.0824	0.111601	de	34.6648	0.119859	a	42.5329	0.147179	a
					T2R2	4.25576	0.0380976	h	13.6964	0.0426112	cde	24.8335	0.043672	fg	34.2632	0.198909	bcd	41.9918	0.141965	ab
					T2R3	4.53987	0.107285	f	13.5689	0.136099	de	24.4369	0.105178	i	33.0656	0.0899177	f	40.0291	0.1357	c
					AverageT2	4.333			13.6551			24.7842			33.9979			41.5179
					T3R1	4.22932	0.0609828	h	13.6882	0.0461495	de	25.107	0.104365	de	34.2087	0.0627276	bcd	42.2166	0.126602	ab
					T3R2	4.32425	0.0790657	gh	13.6689	0.0140748	de	25.0994	0.149971	de	33.9474	0.0113781	d	42.2726	0.271177	ab
					T3R3	4.59171	0.0640216	f	13.7859	0.0315407	bcd	25.438	0.0585921	a	34.4219	0.0425067	ab	42.0487	0.196319	ab
					AverageT3	4.38176			13.7143			25.2148			34.1927			42.1793
					T4R1	4.21812	0.0817645	h	13.6939	0.027881	cde	25.0696	0.0269387	de	34.1362	0.0863188	bcd	42.1022	0.148309	ab
					T4R2	4.34394	0.0739559	gh	13.7067	0.0331714	cde	24.9756	0.0833667	ef	34.0217	0.0647357	cd	42.0357	0.0907435	ab
					T4R3	4.46373	0.013094	fg	13.7687	0.0298651	bcd	25.3879	0.000419304	ab	34.1442	0.0910711	bcd	41.6823	0.0885834	b
					AverageT4	4.34193			13.7231			25.1444			34.1007			41.9401
[truncated: 50 more columns]

## Sheet: Figure2 and Table4 (1)
Index		2020																													2021
	Number	7				13				19				25								31									7				13				19				25				31
22TR6R11	37	170	2.44	84	1.51	215	3.71	98	1.35	235	7.87	75	2.91	26	1.04			9	0.31			29	19	22.79		11	11	8.81			186	2.52	80	1.48	196	4.46	91	2.34	231	7.73	96	3.41	246	9.34	82	2.65	470	21.86
			1.10044		1.10044						1.10044		1.10044	18	0.67		234	6	0.18		78	24	20	1.10044		10	9	1.10044				1.10044		1.10044		1.10044		1.10044		1.10044		1.10044
			1.33956		0.40956		3.71		1.35		6.76956		1.80956	20	0.79		8.91	7	0.22		2.53	24	24	21.6896		9	8	7.70956				1.41956		0.37956		3.35956		1.23956		6.62956		2.30956
														29	1.11			13	0.41			19	21			9	8
														17	0.53			5	0.15			22	30			12	11
														22	0.87			5	0.15			24	25			9	13		1.46996
														25	0.92			10	0.35			25	22			11	12
		170	0.00787976	84	0.00487571	215	0.0172558	98	0.0137755	235	0.0288066	75	0.0241275	29	1.21	234	0.0380769	11	0.38	78	0.0324359	24	27	23.25	0.0466442	8	11	9.85	0.0391348		186	0.00763204	80	0.0047445	196	0.0171406	91	0.0136215	231	0.0286994	96	0.0240579	246	0.0379675	82	0.0323171	23.5	0.0465106
														24	0.88			5	0.16			25	19			9	9
														24	0.89			7	0.22			21	21			9	8
Average														234	8.91			78	2.53				465				197
22TR6R12	40	201	2.68	77	1.49	280	4.79	174	2.31	259	8.54	85	3.18	32	1.29			11	0.34			27	24	22.99		12	8	8.63			168	2.37	83	1.51	252	5.38	128	2.78	243	8.05	81	3.07	235	8.91	99	3.21	462	21.6
			1.10044		1.10044						1.10044		1.10044	33	1.32		278	13	0.46		104	26	21	1.10044		13	5	1.10044				1.10044		1.10044		1.10044		1.10044		1.10044		1.10044
			1.57956		0.38956		4.79		2.31		7.43956		2.07956	25	0.95		10.56	8	0.25		3.39	24	25	21.8896		15	12	7.52956				1.26956		0.40956		4.27956		1.67956		6.94956		1.96956
														23	0.86			5	0.17			22	24			8	9
														27	1.01			13	0.46			22	28			12	8
														25	0.87			7	0.21			22	22			9	7		1.47096
														26	0.94			9	0.29			19	19			14	4
		201	0.00785851	77	0.00505922	280	0.0171071	174	0.0132759	259	0.0287242	85	0.0244654	33	1.34	278	0.0379856	18	0.58	104	0.0325962	25	24	23.35	0.0468727	6	13	9.5	0.0396293		168	0.0075569	83	0.00493446	252	0.0169824	128	0.0131216	243	0.028599	81	0.0243156	235	0.0379149	99	0.0324242	23.1	0.0467532
														28	1.09			12	0.38			24	24			12	6
														26	0.89			8	0.25			25	20			8	9
Average														278	10.56			104	3.39				467				190
22TR6R13	43	150	2.29	73	1.47	244	4.16	149	2.01	206	7.01	75	2.91	27	0.95			10	0.32			24	26	22.89		17	18	8.68			195	2.61	88	1.53	198	4.45	139	2.96	228	7.61	83	3.09	275	10.49	83	2.69	465	21.64
			1.10044		1.10044						1.10044		1.10044	29	1.11		297	10	0.33		101	25	21	1.10044		11	4	1.10044				1.10044		1.10044		1.10044		1.10044		1.10044		1.10044
			1.18956		0.36956		4.16		2.01		5.90956		1.80956	34	1.34		11.37	11	0.37		3.29	19	24	21.7896		8	5	7.57956				1.50956		0.42956		3.34956		1.85956		6.50956		1.98956
														25	0.88			6	0.19			23	19			8	4
														31	1.27			11	0.32			24	24			5	15
														25	0.88			8	0.25			24	21			7	14		1.46846
														30	1.21			9	0.28			24	19			12	9
		150	0.0079304	73	0.00506247	244	0.0170492	149	0.0134899	206	0.0286872	75	0.0241275	34	1.36	297	0.0382828	13	0.44	101	0.0325743	27	24	23.35	0.0466586	13	11	9.9	0.0382806		195	0.00774133	88	0.00488136	198	0.016917	139	0.0133781	228	0.0285507	83	0.0239706	275	0.0381455	83	0.0324096	23.25	0.0465376
														26	0.96			9	0.3			23	28			5	9
														36	1.41			14	0.49			24	24			15	8
Average			0.00788956		0.00499913		0.0171374		0.0135138		0.0287393		0.0242401	297	11.37		0.0381151	101	3.29		0.0325354		467	23.3167	0.0467252		198	9.75	0.0390149			0.00764343		0.00485344		0.0170133		0.0133737		0.0286164		0.0241147		0.0380093		0.0323837	23.2833	0.0466005
22TR6R21	38	210	2.76	88	1.56	175	2.98	130	1.72	195	6.67	42	2.11	26	1.02			6	0.2			24	22	21.51		8	9	7.86			265	3.14	87	1.54	217	4.77	124	2.73	193	6.59	76	2.92	206	7.62	83	2.63	455	20.53
			1.10044		1.10044						1.10044		1.10044	19	0.61		233	3	0.11		65	22	26	1.10044		8	8	1.10044				1.10044		1.10044		1.10044		1.10044		1.10044		1.10044
			1.65956		0.45956		2.98		1.72		5.56956		1.00956	19	0.61		8.65	7	0.21		2.07	26	21	20.4096		12	9	6.75956				2.03956		0.43956		3.66956		1.62956		5.48956		1.81956
														27	1.18			8	0.24			21	19			5	14
														28	1.02			13	0.39			26	27			7	10
														23	0.71			4	0.12			22	22			7	11		1.35846
														27	1.18			11	0.36			21	20			9	8
		210	0.00790267	88	0.00522227	175	0.0170286	130	0.0132308	195	0.0285618	42	0.0240371	18	0.59	233	0.0371245	1	0.03	65	0.0318462	28	20	22.55	0.045254	13	8	8.9	0.0379751		265	0.00769645	87	0.00505241	217	0.0169104	124	0.0131416	193	0.0284433	76	0.0239416	206	0.0369903	83	0.0316867	22.75	0.0451209
														20	0.65			6	0.19			20	21			10	8
														26	1.08			6	0.22			21	22			8	6
Average														233	8.65			65	2.07				451				178
22TR6R22	41	200	2.66	74	1.47	265	4.54	114	1.53	241	8.03	84	3.11	25	0.97			15	0.47			19	23	21.85		13	8	7.55			223	2.79	76	1.47	263	5.57	115	2.63	226	7.57	73	2.84	254	9.39	105	3.35	451	20.24
			1.10044		1.10044						1.10044		1.10044	29	1.11		262	8	0.24		116	21	23	1.10044		10	8	1.10044				1.10044		1.10044		1.10044		1.10044		1.10044		1.10044
			1.55956		0.36956		4.54		1.53		6.92956		2.00956	29	1.12		9.72	10	0.32		3.71	23	22	20.7496		9	8	6.44956				1.68956		0.36956		4.46956		1.52956		6.46956		1.73956
														27	1.09			13	0.44			22	23			10	6
														25	0.86			9	0.27			28	24			7	7
														28	0.98			17	0.52			21	25			4	15		1.35996
														33	1.28			19	0.66			21	23			10	8
		200	0.0077978	74	0.00499405	265	0.0171321	114	0.0134211	241	0.0287534	84	0.0239233	22	0.77	262	0.0370992	8	0.26	116	0.0319828	23	22	23.05	0.0450099	9	6	8.6	0.0374974		223	0.0075765	76	0.00486263	263	0.0169945	115	0.0133005	226	0.0286264	73	0.0238296	254	0.0369685	105	0.0319048	22.55	0.044878
														20	0.72			7	0.21			26	22			13	6
														24	0.82			10	0.32			27	23			7	8
Average														262	9.72			116	3.71				461				172
22TR6R23	44	181	2.55	109	1.65	195	3.31	88	1.21	252	8.34	98	3.47	27	1.06			9	0.28			22	22	21.78		9	9	7.25			187	2.56	89	1.54	214	4.71	96	2.41	226	7.57	87	3.19	253	9.43	89	2.77	445	20.17
			1.10044		1.10044						1.10044		1.10044	25	0.83		253	7	0.21		70	20	21	1.10044		9	8	1.10044				1.10044		1.10044		1.10044		1.10044		1.10044		1.10044
			1.44956		0.54956		3.31		1.21		7.23956		2.36956	27	1.05		9.46	9	0.28		2.19	24	24	20.6796		8	6	6.14956				1.45956		0.43956		3.60956		1.30956		6.46956		2.08956
														26	0.98			5	0.15			25	22			8	7
														31	1.22			9	0.29			24	21			7	9
														17	0.61			4	0.12			24	25			9	8		1.34146
														26	0.95			8	0.25			22	24			9	8
		181	0.00800862	109	0.00504183	195	0.0169744	88	0.01375	252	0.0287284	98	0.0241792	22	0.81	253	0.0373913	4	0.13	70	0.0312857	23	19	22.75	0.0454496	9	7	8.15	0.0377274		187	0.00780513	89	0.00493888	214	0.0168671	96	0.0136413	226	0.0286264	87	0.0240179	253	0.0372727	89	0.0311236	22.25	0.0453258
														26	0.97			9	0.31			21	19			11	6
														26	0.98			6	0.17			21	32			8	8
Average			0.00790303		0.00508605		0.017045		0.0134673		0.0286812		0.0240466	253	9.46		0.037205	70	2.19		0.0317049		455	22.7833	0.0452378		163	8.55	0.0377333			0.0076927		0.00495131		0.016924		0.0133611		0.0285654		0.0239297		0.0370772		0.0315717	22.5167	0.0451083
22TR6R31	39	215	2.87	75	1.53	223	3.84	127	1.73	179	6.06	35	1.89	23	0.72			7	0.21			21	28	19.57		9	8	6.22			236	2.99	101	1.67	237	5.15	108	2.56	186	6.23	82	2.94	247	8.88	86	2.51	428	18.33
			1.10044		1.10044						1.10044		1.10044	29	1.08		249	9	0.27		78	21	22	1.10044		8	5	1.10044				1.10044		1.10044		1.10044		1.10044		1.10044		1.10044
			1.76956		0.42956		3.84		1.73		4.95956		0.78956	24	0.86		8.98	9	0.26		2.28	24	25	18.4696		9	8	5.11956				1.88956		0.56956		4.04956		1.45956		5.12956		1.83956
														23	0.75			4	0.12			18	19			6	5
														28	1.05			9	0.28			19	24			7	11
														27	0.93			12	0.31			26	11			4	9		1.17946
														20	0.84			6	0.17			16	20			5	3
		215	0.00823051	75	0.00572747	223	0.0172197	127	0.013622	179	0.027707	35	0.0225589	29	1.12	249	0.0360643	10	0.31	78	0.0292308	22	24	21.5	0.0429525	10	8	7.65	0.0334612		236	0.00800661	101	0.00563921	237	0.0170868	108	0.0135144	186	0.0275783	82	0.0224337	247	0.0359514	86	0.029186	21.4	0.0428271
														21	0.79			5	0.14			26	25			8	10
														25	0.84			7	0.21			21	18			9	11
Average														249	8.98			78	2.28				430				153
22TR6R32	42	193	2.7	84	1.57	188	3.26	51	0.71	171	5.84	43	2.06	22	0.81			4	0.12			22	23	19.74		13	6	6.06			191	2.65	86	1.57	198	4.51	86	2.29	196	6.51	84	2.96	227	8.19	92	2.71	437	18.54
			1.10044		1.10044						1.10044		1.10044	24	0.89		242	5	0.14		79	21	21	1.10044		8	6	1.10044				1.10044		1.10044		1.10044		1.10044		1.10044		1.10044
			1.59956		0.46956		3.26		0.71		4.73956		0.95956	30	1.16		8.76	9	0.27		2.33	23	25	18.6396		6	9	4.95956				1.54956		0.46956		3.40956		1.18956		5.40956		1.85956
														19	0.67			2	0.06			22	21			14	5
														24	0.84			7	0.21			21	22			9	7
														24	0.85			9	0.26			22	20			7	4		1.17996
														30	1.11			15	0.45			21	22			9	5
		193	0.00828788	84	0.00559	188	0.0173404	51	0.0139216	171	0.0277167	43	0.0223153	23	0.82	242	0.0361983	7	0.21	79	0.0294937	21	23	21.9	0.0425561	8	7	7.35	0.0337385		191	0.00811288	86	0.00546	198	0.01722	86	0.0138321	196	0.0275998	84	0.0221376	227	0.0360793	92	0.0294565	21.85	0.0424256
														25	0.89			15	0.44			25	21			8	5
														21	0.72			6	0.17			22	20			5	6
Average														242	8.76			79	2.33				438				147
22TR6R33	45	177	2.59	86	1.59	222	3.83	70	0.92	183	6.16	60	2.44	23	0.88			8	0.23			26	23	19.89		7	4	5.89			196	2.71	96	1.63	230	5.04	92	2.3	204	6.72	69	2.63	199	7.24	87	2.53	419	17.96
			1.10044		1.10044						1.10044		1.10044	18	0.61		202	5	0.15		49	26	22	1.10044		5	14	1.10044				1.10044		1.10044		1.10044		1.10044		1.10044		1.10044
			1.48956		0.48956		3.83		0.92		5.05956		1.33956	21	0.72		7.37	4	0.11		1.43	21	19	18.7896		4	4	4.78956				1.60956		0.52956		3.93956		1.19956		5.61956		1.52956
														21	0.72			5	0.15			20	24			6	8
														17	0.65			5	0.15			24	23			6	7
														14	0.52			3	0.08			21	22			4	5		1.17896
														21	0.83			5	0.15			20	18			9	15
		177	0.00841559	86	0.00569256	222	0.0172523	70	0.0131429	183	0.0276479	60	0.022326	21	0.83	202	0.0364851	5	0.15	49	0.0291837	20	22	21.85	0.0429967	7	7	7.15	0.0334934		196	0.00821204	96	0.00551625	230	0.0171285	92	0.0130387	204	0.0275469	69	0.0221675	199	0.0363819	87	0.0290805	20.95	0.042864
														26	0.92			5	0.15			19	21			7	6
														20	0.69			4	0.11			25	21			12	6
Average			0.00831133		0.00567001		0.0172708		0.0135622		0.0276905		0.0224001	202	7.37		0.0362493	49	1.43		0.0293027		437	21.75	0.0428351		143	7.38333	0.0335644			0.00811051		0.00553849		0.0171451		0.0134617		0.027575		0.0222463		0.0361375		0.029241	21.4	0.0427056
22TR6LR11	46	212	2.79	111	1.67	222	3.68	92	1.11	264	8.53	126	4.03	21	0.75			10	0.32			21	22	22.07		9	9	7.87			187	2.55	81	1.51	217	4.67	93	2.21	264	8.49	95	3.3	215	7.95	92	2.88	452	20.78
			1.10044		1.10044						1.10044		1.10044	24	0.93		217	14	0.45		93	22	22	1.10044		10	10	1.10044				1.10044		1.10044		1.10044		1.10044		1.10044		1.10044
			1.68956		0.56956		3.68		1.11		7.42956		2.92956	24	0.93		8.05	12	0.36		2.92	21	22	20.9696		9	8	6.76956				1.44956		0.40956		3.56956		1.10956		7.38956		2.19956
														21	0.74			8	0.25			24	25			8	9
														20	0.81			9	0.28			22	26			9	13
														20	0.81			8	0.27			24	21			8	8		1.38696
														18	0.63			6	0.19			19	24			9	8
		212	0.00796962	111	0.00513117	222	0.0165766	92	0.0120652	264	0.0281423	126	0.0232505	19	0.64	217	0.0370968	10	0.3	93	0.0313978	25	26	22.75	0.0460869	8	11	9	0.0376087		187	0.00775166	81	0.0050563	217	0.0164496	93	0.0119308	264	0.0279908	95	0.0231533	215	0.0369767	92	0.0313043	22.6	0.0459735
														26	0.96			6	0.18			22	28			6	9
														24	0.85			10	0.32			20	19			11	8
Average														217	8.05			93	2.92				455				180
22TR6LR12	49	206	2.75	67	1.44	181	3.03	114	1.41	212	7.09	81	2.98	29	1.11			6	0.19			24	21	21.92		9	8	7.89			182	2.51	69	1.44	193	4.31	97	2.29	234	7.68	78	2.9	237	8.74	93	2.93	441	20.44
			1.10044		1.10044						1.10044		1.10044	28	1.07		264	12	0.39		113	22	21	1.10044		8	6	1.10044				1.10044		1.10044		1.10044		1.10044		1.10044		1.10044
			1.64956		0.33956		3.03		1.41		5.98956		1.87956	25	0.91		9.77	9	0.29		3.57	25	20	20.8196		8	13	6.78956				1.40956		0.33956		3.20956		1.18956		6.57956		1.79956
														30	1.16			15	0.48			24	24			11	7
														24	0.83			16	0.53			23	21			9	8
														31	1.19			9	0.28			21	23			9	12		1.38046
														28	1.05			10	0.32			20	24			7	12
		206	0.00800757	67	0.00506806	181	0.0167403	114	0.0123684	212	0.0282526	81	0.0232044	23	0.81	264	0.0370076	6	0.19	113	0.0315929	25	21	22.4	0.0464722	8	9	8.75	0.0387975		182	0.00774484	69	0.00492116	193	0.0166298	97	0.0122635	234	0.0281178	78	0.0230713	237	0.0368776	93	0.0315054	22.05	0.0463492
														25	0.92			15	0.46			24	20			8	8
														21	0.72			15	0.44			23	22			8	7
Average														264	9.77			113	3.57				448				175
22TR6LR13	52	180	2.51	52	1.36	189	3.19	112	1.36	236	7.81	85	3.07	23	0.86			13	0.41			26	17	22.15		8	7	7.76			185	2.51	78	1.48	199	4.44	114	2.47	241	7.92	85	3.06	225	8.31	94	2.96	449	20.63
			1.10044		1.10044						1.10044		1.10044	23	0.86		229	11	0.36		97	27	20	1.10044		12	9	1.10044				1.10044		1.10044		1.10044		1.10044		1.10044		1.10044
			1.40956		0.25956		3.19		1.36		6.70956		1.96956	25	0.94		8.49	10	0.38		3.07	27	27	21.0496		8	8	6.65956				1.40956		0.37956		3.33956		1.36956		6.81956		1.95956
														24	0.87			7	0.22			22	23			9	10
														18	0.64			6	0.16			22	20			12	7
														22	0.83			12	0.38			20	22			13	7		1.38546
														22	0.83			8	0.24			22	22			7	9
		180	0.00783089	52	0.00499154	189	0.0168783	112	0.0121429	236	0.0284303	85	0.0231713	25	0.96	229	0.0370742	9	0.33	97	0.0316495	27	25	22.85	0.0460603	8	10	8.7	0.0382733		185	0.00761924	78	0.00486615	199	0.0167817	114	0.0120137	241	0.0282969	85	0.0230536	225	0.0369333	94	0.0314894	22.45	0.0459465
														23	0.84			7	0.17			24	20			6	9
														24	0.86			14	0.42			20	24			8	7
Average			0.00793603		0.00506359		0.0167317		0.0121922		0.0282751		0.0232087	229	8.49		0.0370595	97	3.07		0.0315468		457	22.6667	0.0462065		174	8.81667	0.0382265			0.00770525		0.00494787		0.0166204		0.0120693		0.0281352		0.0230927		0.0369292		0.031433	22.3667	0.0460897
22TR6LR21	47	237	3.04	111	1.65	208	3.61	143	2.09	242	8.04	90	3.34	25	0.99			11	0.35			20	11	22.38		7	6	7.85			236	2.99	82	1.51	224	4.96	151	3.29	236	7.84	84	3.18	225	8.57	97	3.15	441	20.89
			1.10044		1.10044						1.10044		1.10044	25	0.97		252	7	0.22		103	31	26	1.10044		10	9	1.10044				1.10044		1.10044		1.10044		1.10044		1.10044		1.10044
			1.93956		0.54956		3.61		2.09		6.93956		2.23956	24	0.95		9.63	8	0.24		3.36	15	20	21.2796		8	8	6.74956				1.88956		0.40956		3.85956		2.18956		6.73956		2.07956
														24	0.94			10	0.32			22	22			8	13
														28	1.08			16	0.55			21	20			11	5
														22	0.79			6	0.18			24	22			6	13		1.40146
														26	1.02			13	0.43			22	24			8	11
		237	0.0081838	111	0.00495099	208	0.0173558	143	0.0146154	242	0.0286759	90	0.024884	27	1.06	252	0.0382143	10	0.32	103	0.0326214	24	28	22.4	0.047499	5	6	8.35	0.0404165		236	0.00800661	82	0.00499463	224	0.0172302	151	0.0145004	236	0.0285575	84	0.0247567	225	0.0380889	97	0.0324742	22.05	0.0473696
														26	0.94			8	0.26			19	22			8	8
														25	0.89			14	0.49			28	27			8	9
Average														252	9.63			103	3.36				448				167
22TR6LR22	50	261	3.21	128	1.77	205	3.57	142	1.99	277	9.08	120	4.07	26	1.01			9	0.29			24	27	22.31		7	6	8.01			196	2.65	89	1.56	267	5.72	106	2.57	259	8.53	102	3.61	243	9.27	82	2.68	451	21.39
			1.10044		1.10044						1.10044		1.10044	22	0.79		253	7	0.23		87	21	22	1.10044		13	9	1.10044				1.10044		1.10044		1.10044		1.10044		1.10044		1.10044
			2.10956		0.66956		3.57		1.99		7.97956		2.96956	31	1.25		9.68	12	0.42		2.85	24	19	21.2096		5	6	6.90956				1.54956		0.45956		4.61956		1.46956		7.42956		2.50956
														31	1.26			12	0.42			24	25			8	8
														19	0.72			8	0.26			21	25			12	10
														25	0.98			9	0.31			22	20			8	8		1.40596
														25	0.99			7	0.16			25	22			9	12
		261	0.00808261	128	0.00523094	205	0.0174146	142	0.0140141	277	0.0288071	120	0.0247463	29	0.99	253	0.0382609	11	0.35	87	0.0327586	20	22	22.3	0.0475551	12	9	8.55	0.0404068		196	0.00790592	89	0.0051636	267	0.0173017	106	0.0138638	259	0.0286856	102	0.0246035	243	0.0381481	82	0.0326829	22.55	0.0474279
														19	0.66			3	0.09			22	23			8	7
														26	1.03			9	0.32			22	16			10	4
Average														253	9.68			87	2.85				446				171
22TR6LR23	53	208	2.72	87	1.54	236	4.13	111	1.55	260	8.54	75	2.96	21	0.75			6	0.19			22	22	22.31		10	11	7.96			189	2.54	91	1.55	237	5.22	107	2.58	258	8.45	86	3.22	231	8.84	79	2.53	447	20.92
			1.10044		1.10044						1.10044		1.10044	19	0.68		222	8	0.25		73	24	25	1.10044		7	10	1.10044				1.10044		1.10044		1.10044		1.10044		1.10044		1.10044
			1.61956		0.43956		4.13		1.55		7.43956		1.85956	18	0.66		8.52	4	0.13		2.35	21	21	21.2096		8	8	6.85956				1.43956		0.44956		4.11956		1.47956		7.34956		2.11956
														27	1.16			8	0.24			25	22			8	10
														28	1.19			12	0.41			22	22			6	12
														20	0.69			6	0.19			20	23			8	6		1.40346
														24	0.98			11	0.36			22	19			12	8
		208	0.00778635	87	0.00505241	236	0.0175	111	0.013964	260	0.0286137	75	0.0247941	20	0.69	222	0.0383784	5	0.17	73	0.0321918	19	24	22.6	0.0469238	9	7	8.6	0.0398812		189	0.00761672	91	0.00494022	237	0.0173821	107	0.0138277	258	0.0284867	86	0.024646	231	0.0382684	79	0.0320253	22.35	0.0468009
														21	0.74			6	0.19			26	25			4	12
														24	0.98			7	0.22			22	26			8	8
Average			0.00801758		0.00507811		0.0174235		0.0141978		0.0286989		0.0248082	222	8.52		0.0382845	73	2.35		0.0325239		452	22.4333	0.047326		172	8.5	0.0402348			0.00784308		0.00503282		0.0173047		0.0140639		0.0285766		0.0246687		0.0381685		0.0323942	22.3167	0.0471995
22TR6LR31	48	196	2.81	110	1.73	222	3.91	68	0.99	290	9.67	127	4.27	31	1.31			7	0.24			33	27	23.06		14	9	8.85			183	2.65	98	1.65	231	5.14	98	2.52	231	7.9	97	3.51	252	9.89	86	2.91	469	21.53
			1.10044		1.10044						1.10044		1.10044	29	1.26		233	9	0.32		59	23	22	1.10044		16	10	1.10044				1.10044		1.10044		1.10044		1.10044		1.10044		1.10044
			1.70956		0.62956		3.91		0.99		8.56956		3.16956	25	1.09		9.17	8	0.28		2	27	29	21.9596		11	9	7.74956				1.54956		0.54956		4.03956		1.41956		6.79956		2.40956
														30	1.29			15	0.51			24	24			8	10
														17	0.54			1	0.03			32	28			9	8
														23	0.91			8	0.26			21	21			14	7		1.48546
														21	0.73			5	0.16			24	23			9	10
		196	0.00872224	110	0.00572327	222	0.0176126	68	0.0145588	290	0.0295502	127	0.0249572	17	0.61	233	0.0393562	2	0.06	59	0.0338983	24	19	23.85	0.0460368	9	9	9.95	0.0389425		183	0.00846754	98	0.00560776	231	0.0174873	98	0.0144853	231	0.0294353	97	0.0248408	252	0.039246	86	0.0338372	23.45	0.0459062
														18	0.57			1	0.03			20	22			10	9
														22	0.86			3	0.11			19	15			9	9
Average														233	9.17			59	2				477				199
22TR6LR32	51	180	2.65	84	1.59	204	3.59	83	1.19	214	7.41	48	2.3	27	1.19			6	0.21			28	30	23.14		9	11	8.77			214	2.9	87	1.61	209	4.75	92	2.41	212	7.33	83	3.16	219	8.57	81	2.71	464	21.61
			1.10044		1.10044						1.10044		1.10044	21	0.77		229	4	0.13		45	26	16	1.10044		11	9	1.10044				1.10044		1.10044		1.10044		1.10044		1.10044		1.10044
			1.54956		0.48956		3.59		1.19		6.30956		1.19956	27	1.19		8.99	8	0.32		1.51	25	24	22.0396		13	10	7.66956				1.79956		0.50956		3.64956		1.30956		6.22956		2.05956
														23	0.89			1	0.04			25	20			12	10
														21	0.74			6	0.2			22	20			10	9
														18	0.64			1	0.06			22	20			10	10		1.48546
														20	0.72			2	0.07			24	28			8	9
		180	0.00860867	84	0.0058281	204	0.017598	83	0.0143373	214	0.0294839	48	0.0249908	21	0.78	229	0.0392576	3	0.07	45	0.0335556	27	24	23.6	0.046694	11	9	10.05	0.038157		214	0.00840916	87	0.00585701	209	0.017462	92	0.0142343	212	0.0293847	83	0.024814	219	0.0391324	81	0.0334568	23.2	0.0465733
														22	0.81			2	0.06			27	22			8	11
														29	1.26			12	0.35			20	22			9	12
Average														229	8.99			45	1.51				472				201
22TR6LR33	54	241	3.16	119	1.78	192	3.35	133	1.91	218	7.59	61	2.62	23	0.83			4	0.15			14	26	23.53		9	14	8.46			208	2.84	107	1.7	210	4.74	107	2.62	241	8.25	81	3.11	239	9.38	79	2.62	482	22.28
			1.10044		1.10044						1.10044		1.10044	23	0.82		258	5	0.17		55	31	24	1.10044		10	9	1.10044				1.10044		1.10044		1.10044		1.10044		1.10044		1.10044
			2.05956		0.67956		3.35		1.91		6.48956		1.51956	27	1.16		10.16	7	0.22		1.83	25	31	22.4296		10	11	7.35956				1.73956		0.59956		3.63956		1.51956		7.14956		2.00956
														25	0.93			5	0.19			23	27			9	8
														31	1.31			9	0.3			27	22			10	11
														29	1.21			8	0.26			25	24			9	9		1.48946
														22	0.79			4	0.13			21	19			8	10
		241	0.00854589	119	0.00571059	192	0.0174479	133	0.0143609	218	0.0297686	61	0.0249108	24	0.88	258	0.0393798	3	0.1	55	0.0332727	28	31	24.2	0.0463421	9	10	9.75	0.0377413		208	0.00836327	107	0.00560336	210	0.0173312	107	0.0142015	241	0.0296662	81	0.0248094	239	0.0392469	79	0.0331646	24.1	0.0462241
														29	1.22			8	0.28			21	26			9	9
														25	1.01			2	0.03			20	19			12	9
Average			0.0086256		0.00575399		0.0175529		0.014419		0.0296009		0.0249529	258	10.16		0.0393312	55	1.83		0.0335755		484	23.8833	0.0463576		195	9.91667	0.0382803			0.00841332		0.00568938		0.0174268		0.014307		0.0294954		0.0248214		0.0392084		0.0334862	23.5833	0.0462345
22TR6SR11	55	177	2.49	88	1.54	205	3.44	87	1.05	234	7.71	101	3.43	27	1.02			16	0.52			18	24	21.88		7	9	7.82			192	2.55	99	1.58	258	5.4	99	2.28	228	7.51	98	3.35	209	7.74	82	2.56	441	20.45
			1.10044		1.10044						1.10044		1.10044	24	0.98		206	9	0.28		87	21	18	1.10044		11	8	1.10044				1.10044		1.10044		1.10044		1.10044		1.10044		1.10044
			1.38956		0.43956		3.44		1.05		6.60956		2.32956	15	0.51		7.65	15	0.48		2.73	24	25	20.7796		8	12	6.71956				1.44956		0.47956		4.29956		1.17956		6.40956		2.24956
														16	0.52			5	0.15			27	19			7	9
														21	0.86			6	0.18			21	22			9	10
														16	0.55			6	0.19			23	27			9	13		1.37496
														24	0.83			9	0.27			26	26			8	10
		177	0.00785062	88	0.004995	205	0.0167805	87	0.012069	234	0.028246	101	0.023065	19	0.71	206	0.0371359	6	0.18	87	0.0313793	23	23	22.35	0.0464867	6	9	8.85	0.0379636		192	0.00754979	99	0.00484404	258	0.016665	99	0.0119147	228	0.0281121	98	0.0229547	209	0.0370335	82	0.0312195	22.05	0.0463719
														23	0.91			8	0.25			20	20			7	8
														21	0.76			7	0.23			21	19			9	8
Average														206	7.65			87	2.73				447				177
22TR6SR12	58	171	2.49	85	1.52	220	3.69	123	1.54	290	9.24	137	4.28	31	1.26			16	0.51			26	22	22.06		7	5	7.84			189	2.61	79	1.48	224	4.83	104	2.39	224	7.36	134	4.19	264	9.85	106	3.35	457	21.04
			1.10044		1.10044						1.10044		1.10044	30	1.18		274	21	0.66		157	23	23	1.10044		12	11	1.10044				1.10044		1.10044		1.10044		1.10044		1.10044		1.10044
			1.38956		0.41956		3.69		1.54		8.13956		3.17956	29	1.21		10.26	20	0.64		4.98	18	25	20.9596		13	8	6.73956				1.50956		0.37956		3.72956		1.28956		6.25956		3.08956
														23	0.8			9	0.28			25	21			11	8
														24	0.84			15	0.47			26	21			10	11
														31	1.21			20	0.62			21	27			11	7		1.38496
														25	0.85			10	0.33			24	16			8	7
		171	0.00812608	85	0.004936	220	0.0167727	123	0.0125203	290	0.0280674	137	0.0232085	24	0.84	274	0.0374453	13	0.41	157	0.0317197	26	25	22.7	0.0461664	8	9	9	0.037442		189	0.00798709	79	0.00480456	224	0.0166498	104	0.0123996	224	0.0279445	134	0.0230564	264	0.0373106	106	0.0316038	22.85	0.0460394
														26	0.88			13	0.43			22	18			8	9
														31	1.19			20	0.63			24	21			7	10
Average														274	10.26			157	4.98				454				180
22TR6SR13	61	159	2.37	64	1.43	250	4.18	98	1.17	230	7.57	103	3.47	30	1.16			14	0.43			27	27	22.23		12	8	7.59			200	2.65	86	1.53	234	4.98	93	2.22	241	7.85	96	3.31	251	9.29	83	2.62	442	20.16
			1.10044		1.10044						1.10044		1.10044	31	1.21		251	17	0.59		102	27	14	1.10044		8	8	1.10044				1.10044		1.10044		1.10044		1.10044		1.10044		1.10044
			1.26956		0.32956		4.18		1.17		6.46956		2.36956	26	0.98		9.32	12	0.38		3.23	27	25	21.1296		10	8	6.48956				1.54956		0.42956		3.87956		1.11956		6.74956		2.20956
														22	0.78			5	0.15			20	26			7	10
														30	1.16			6	0.18			20	23			9	9
														26	0.93			11	0.35			24	20			7	8		1.38096
														24	0.84			11	0.36			22	19			12	11
		159	0.00798465	64	0.00514938	250	0.01672	98	0.0119388	230	0.0281285	103	0.0230054	17	0.59	251	0.0371315	4	0.12	102	0.0316667	25	20	23.1	0.045735	7	8	8.7	0.0372963		200	0.0077478	86	0.00499488	234	0.0165793	93	0.0120383	241	0.0280065	96	0.0230162	251	0.037012	83	0.0315663	22.1	0.0456109
														17	0.59			8	0.24			27	24			8	10
														28	1.08			14	0.43			24	21			7	7
Average			0.00798712		0.00502679		0.0167577		0.012176		0.0281473		0.023093	251	9.32		0.0372376	102	3.23		0.0315886		462	22.7167	0.0461294		174	8.85	0.0375673			0.00776156		0.00488116		0.0166314		0.0121175		0.028021		0.0230091		0.0371187		0.0314632	22.3333	0.0460074
22TR6SR21	56	212	2.79	78	1.49	232	4.05	122	1.73	213	7.22	101	3.58	23	0.91			6	0.19			19	17	21.85		5	9	8.01			189	2.56	86	1.52	227	5.04	103	2.55	211	7.14	98	3.49	228	8.75	86	2.81	449	20.79
			1.10044		1.10044						1.10044		1.10044	22	0.88		238	5	0.15		75	22	22	1.10044		9	11	1.10044				1.10044		1.10044		1.10044		1.10044		1.10044		1.10044
			1.68956		0.38956		4.05		1.73		6.11956		2.47956	26	0.99		9.16	10	0.33		2.46	27	17	20.7496		10	10	6.90956				1.45956		0.41956		3.93956		1.44956		6.03956		2.38956
														26	0.98			14	0.48			20	20			5	6
														22	0.81			6	0.18			22	22			9	10
														27	1.16			10	0.34			28	26			9	8		1.38296
														19	0.68			6	0.19			18	24			8	9
		212	0.00796962	78	0.00499436	232	0.0174569	122	0.0141803	213	0.0287303	101	0.0245501	26	1.07	238	0.0384874	8	0.25	75	0.0328	24	22	22.35	0.0464196	9	10	8.7	0.0397101		189	0.00772254	86	0.0048786	227	0.0173549	103	0.0140734	211	0.0286235	98	0.0243833	228	0.0383772	86	0.0326744	22.45	0.0463029
														21	0.77			4	0.12			23	24			9	10
														26	0.91			6	0.23			28	22			9	9
Average														238	9.16			75	2.46				447				174
22TR6SR22	59	164	2.42	84	1.52	247	4.32	157	2.22	261	8.49	79	3.03	23	0.83			8	0.26			25	19	22.05		8	6	8.09			168	2.42	87	1.52	234	5.16	107	2.61	224	7.41	84	3.14	231	8.81	81	2.61	454	20.76
			1.10044		1.10044						1.10044		1.10044	24	0.93		230	7	0.22		92	21	24	1.10044		7	9	1.10044				1.10044		1.10044		1.10044		1.10044		1.10044		1.10044
			1.31956		0.41956		4.32		2.22		7.38956		1.92956	23	0.92		8.79	4	0.12		2.97	25	19	20.9496		11	9	6.98956				1.31956		0.41956		4.05956		1.50956		6.30956		2.03956
														22	0.84			8	0.26			26	27			9	11
														18	0.61			7	0.22			20	20			9	8
														28	1.18			19	0.62			21	20			9	10		1.39696
														22	0.73			14	0.44			21	24			7	6
		164	0.0080461	84	0.00499476	247	0.0174899	157	0.0141401	261	0.0283125	79	0.0244248	23	0.83	230	0.0382174	6	0.19	92	0.0322826	20	26	22.85	0.0458415	9	12	8.95	0.0390478		168	0.00785452	87	0.00482253	234	0.0173485	107	0.014108	224	0.0281677	84	0.0242805	231	0.0381385	81	0.0322222	22.7	0.0457269
														25	1.05			11	0.35			22	24			9	10
														22	0.87			8	0.29			26	27			11	9
Average														230	8.79			92	2.97				457				179
22TR6SR23	62	163	2.38	63	1.42	235	4.09	82	1.17	237	7.78	67	2.73	26	1.09			12	0.39			25	20	22.21		6	8	7.86			174	2.43	81	1.51	246	5.35	89	2.36	235	7.69	86	3.18	251	9.61	96	3.08	446	20.59
			1.10044		1.10044						1.10044		1.10044	25	0.97		250	8	0.25		96	23	19	1.10044		7	12	1.10044				1.10044		1.10044		1.10044		1.10044		1.10044		1.10044
			1.27956		0.31956		4.09		1.17		6.67956		1.62956	19	0.63		9.6	7	0.22		3.09	26	22	21.1096		6	8	6.75956				1.32956		0.40956		4.24956		1.25956		6.58956		2.07956
														25	0.97			9	0.31			22	25			13	9
														32	1.24			19	0.59			22	23			6	7
														23	0.79			9	0.28			22	29			9	15		1.39346
														19	0.74			7	0.26			27	22			9	7
		163	0.00785006	63	0.00507238	235	0.0174043	82	0.0142683	237	0.0281838	67	0.0243218	30	1.26	250	0.0384	13	0.42	96	0.0321875	22	22	22.8	0.0462929	5	9	8.75	0.0386261		174	0.00764115	81	0.0050563	246	0.0172746	89	0.0141524	235	0.0280407	86	0.0241809	251	0.0382869	96	0.0320833	22.3	0.0461659
														22	0.75			6	0.18			19	20			10	19
														29	1.16			6	0.19			20	26			6	4
Average			0.00795526		0.0050205		0.0174503		0.0141962		0.0284089		0.0244322	250	9.6		0.0383683	96	3.09		0.0324234		456	22.6667	0.0461847		175	8.8	0.039128			0.0077394		0.00491914		0.017326		0.0141113		0.0282773		0.0242816		0.0382675		0.0323267	22.4833	0.0460652
22TR6SR31	57	209	2.82	83	1.54	199	3.47	72	1.03	244	8.25	72	2.89	24	0.99			6	0.19			22	20	22.59		8	12	8.06			199	2.69	82	1.53	209	4.72	86	2.32	267	8.89	86	3.23	218	8.61	86	2.8	455	21.34
			1.10044		1.10044						1.10044		1.10044	16	0.48		225	1	0.03		45	23	21	1.10044		7	7	1.10044				1.10044		1.10044		1.10044		1.10044		1.10044		1.10044
			1.71956		0.43956		3.47		1.03		7.14956		1.78956	19	0.73		8.9	1	0.04		1.47	22	25	21.4896		6	13	6.95956				1.58956		0.42956		3.61956		1.21956		7.78956		2.12956
														24	0.95			6	0.22			21	23			6	8
														23	0.89			5	0.16			27	22			11	6
														27	1.15			8	0.26			28	28			8	7		1.42246
														23	0.89			6	0.19			25	20			13	8
		209	0.00822756	83	0.0052959	199	0.0174372	72	0.0143056	244	0.0293015	72	0.024855	23	0.88	225	0.0395556	5	0.16	45	0.0326667	26	19	22.85	0.0470231	8	7	8.85	0.0393195		199	0.00798774	82	0.00523854	209	0.0173185	86	0.0141809	267	0.0291744	86	0.0247623	218	0.0394954	86	0.0325581	22.75	0.0469011
														25	1.08			6	0.19			18	18			13	5
														21	0.86			1	0.03			22	27			11	13
Average														225	8.9			45	1.47				457				177
22TR6SR32	60	178	2.58	47	1.35	209	3.66	74	1.06	235	7.92	54	2.45	19	0.83			5	0.15			27	21	22.36		8	16	8.28			182	2.59	79	1.51	212	4.79	89	2.37	233	7.83	76	2.99	207	8.08	81	2.66	451	21.21
			1.10044		1.10044						1.10044		1.10044	16	0.53		215	2	0.07		38	28	27	1.10044		8	10	1.10044				1.10044		1.10044		1.10044		1.10044		1.10044		1.10044
			1.47956		0.24956		3.66		1.06		6.81956		1.34956	19	0.84		8.42	1	0.03		1.25	16	29	21.2596		6	10	7.17956				1.48956		0.40956		3.68956		1.26956		6.72956		1.88956
														22	0.76			3	0.09			20	25			8	10
														26	0.97			5	0.18			20	26			11	8
														27	1.06			5	0.18			21	19			11	7		1.42196
														20	0.81			3	0.1			22	19			8	10
		178	0.00831213	47	0.00530979	209	0.017512	74	0.0143243	235	0.0290194	54	0.0249919	20	0.82	215	0.0391628	7	0.22	38	0.0328947	18	21	22.55	0.0471387	5	11	9.25	0.0388084		182	0.0081844	79	0.0051843	212	0.0174036	89	0.0142647	233	0.0288822	76	0.0248626	207	0.0390338	81	0.0328395	22.55	0.0470288
														26	0.99			6	0.19			20	22			11	11
														20	0.81			1	0.04			26	24			8	8
Average														215	8.42			38	1.25				451				185
22TR6SR33	63	161	2.45	80	1.53	194	3.39	70	1.01	194	6.75	51	2.37	22	0.87			9	0.27			20	32	22.85		6	8	7.94			185	2.62	69	1.46	286	6.06	97	2.49	224	7.61	79	3.06	237	9.24	83	2.71	457	21.46
			1.10044		1.10044						1.10044		1.10044	18	0.69		205	1	0.04		39	21	26	1.10044		10	8	1.10044				1.10044		1.10044		1.10044		1.10044		1.10044		1.10044
			1.34956		0.42956		3.39		1.01		5.64956		1.26956	23	0.94		8.02	7	0.23		1.28	27	21	21.7496		6	10	6.83956				1.51956		0.35956		4.95956		1.38956		6.50956		1.95956
														19	0.68			6	0.19			19	19			8	11
														21	0.85			6	0.2			24	27			11	12
														24	0.99			1	0.04			21	26			6	8		1.42946
														18	0.65			4	0.13			21	21			8	12
		161	0.00838236	80	0.0053695	194	0.0174742	70	0.0144286	194	0.0291214	51	0.0248933	18	0.64	205	0.039122	3	0.11	39	0.0328205	19	26	23.1	0.047077	11	8	8.8	0.0388611		185	0.00821384	69	0.00521101	286	0.0173411	97	0.0143254	224	0.0290605	79	0.0248046	237	0.0389873	83	0.0326506	22.85	0.0469584
														21	0.83			1	0.03			22	24			7	10
														21	0.88			1	0.04			24	22			8	8
Average			0.00830735		0.00532506		0.0174745		0.0143528		0.0291474		0.0249134	205	8.02		0.0392801	39	1.28		0.032794		462	22.8333	0.0470796		176	8.96667	0.0389964			0.00812866		0.00521128		0.0173544		0.014257		0.029039		0.0248098		0.0391722		0.0326827	22.7167	0.0469628
22TR4R11	64	183	2.59	114	1.68	223	3.83	98	1.37	261	8.62	104	3.69	29	1.18			16	0.56			25	28	23.91		13	21	9.39			169	2.44	106	1.63	219	4.83	109	2.61	263	8.65	89	3.31	236	9.06	102	3.3	475	22.19
			1.10044		1.10044						1.10044		1.10044	29	1.19		256	12	0.34		139	20	24	1.10044		9	16	1.10044				1.10044		1.10044		1.10044		1.10044		1.10044		1.10044
			1.48956		0.57956		3.83		1.37		7.51956		2.58956	27	1.06		9.86	16	0.57		4.51	23	29	22.8096		10	12	8.28956				1.33956		0.52956		3.72956		1.50956		7.54956		2.20956
														25	0.97			18	0.49			19	28			3	13
														25	0.97			10	0.31			29	21			11	1
														25	0.93			20	0.73			24	21			3	7		1.55496
														20	0.76			7	0.21			21	27			7	14
		183	0.00813967	114	0.00508386	223	0.0171749	98	0.0139796	261	0.0288106	104	0.0248996	19	0.71	256	0.0385156	15	0.56	139	0.032446	22	27	24.35	0.0468369	8	10	10.55	0.039287		169	0.00792639	106	0.00499585	219	0.01703	109	0.0138492	263	0.0287056	89	0.0248265	236	0.0383898	102	0.0323529	23.75	0.0467158
														27	0.97			10	0.31			23	27			12	16
														30	1.12			15	0.43			21	28			8	17
Average														256	9.86			139	4.51				487				211
22TR4R12	66	226	2.89	133	1.77	258	4.46	127	1.71	270	8.89	114	3.94	25	0.98			13	0.42			22	22	23.74		6	8	9.38			198	2.63	125	1.72	243	5.27	139	2.96	272	8.91	106	3.73	219	8.48	87	2.83	479	22.68
			1.10044		1.10044						1.10044		1.10044	12	0.45		242	8	0.28		104	28	21	1.10044		7	11	1.10044				1.10044		1.10044		1.10044		1.10044		1.10044		1.10044
			1.78956		0.66956		4.46		1.71		7.78956		2.83956	25	0.95		9.4	13	0.51		3.39	29	19	22.6396		18	7	8.27956				1.52956		0.61956		4.16956		1.85956		7.80956		2.62956
														24	0.89			8	0.25			24	29			8	9
														18	0.72			7	0.22			22	25			12	16
														31	1.21			13	0.31			26	24			7	8		1.54596
														28	1.01			10	0.26			26	24			18	9
		226	0.00791841	133	0.00503429	258	0.0172868	127	0.0134646	270	0.0288502	114	0.0249084	28	1.09	242	0.038843	10	0.36	104	0.0325962	24	23	23.85	0.0474624	12	9	10.25	0.0403881		198	0.00772505	125	0.00495648	243	0.0171587	139	0.0133781	272	0.0287116	106	0.0248072	219	0.0387215	87	0.0325287	23.95	0.0473486
														26	1.09			13	0.44			27	20			12	15
														25	1.01			9	0.34			25	17			7	6
Average														242	9.4			104	3.39				477				205
22TR4R13	68	220	2.85	117	1.68	233	4.02	111	1.49	202	6.91	70	2.84	27	0.97			11	0.37			22	29	23.91		18	6	9.33			195	2.6	116	1.66	241	5.23	99	2.42	212	7.17	89	3.31	256	9.8	80	2.61	477	22.51
			1.10044		1.10044						1.10044		1.10044	20	0.79		238	8	0.24		85	23	23	1.10044		6	8	1.10044				1.10044		1.10044		1.10044		1.10044		1.10044		1.10044
			1.74956		0.57956		4.02		1.49		5.80956		1.73956	26	1.08		9.14	12	0.39		2.77	19	26	22.8096		13	7	8.22956				1.49956		0.55956		4.12956		1.31956		6.06956		2.20956
														23	0.83			8	0.21			22	24			8	6
														21	0.75			5	0.16			19	23			6	7
														23	0.91			6	0.22			28	27			17	10		1.55196
														24	0.93			16	0.57			24	29			10	14
		220	0.00795255	117	0.0049535	233	0.0172532	111	0.0134234	202	0.0287602	70	0.0248509	21	0.77	238	0.0384034	6	0.17	85	0.0325882	25	30	24.1	0.0473227	14	8	10.15	0.0405397		195	0.00769005	116	0.00482379	241	0.0171351	99	0.0133289	212	0.02863	89	0.0248265	256	0.0382813	80	0.032625	23.85	0.0471908
														27	1.09			5	0.17			25	23			14	9
														26	1.02			8	0.27			17	24			16	6
Average			0.00800354		0.00502388		0.0172383		0.0136225		0.028807		0.0248863	238	9.14		0.0385873	85	2.77		0.0325435		482	24.1	0.0472073		203	10.3167	0.0400716			0.0077805		0.00492537		0.0171079		0.0135187		0.0286824		0.0248201		0.0384642		0.0325022	23.85	0.0470851
22TR4R21	65	227	2.91	93	1.57	264	4.49	128	1.77	227	7.68	53	2.42	24	0.93			7	0.21			26	25	23.99		7	12	9.12			211	2.73	106	1.62	239	5.14	96	2.42	263	8.69	94	3.43	219	8.34	89	2.86	466	21.98
			1.10044		1.10044						1.10044		1.10044	29	1.16		224	14	0.51		84	27	27	1.10044		8	6	1.10044				1.10044		1.10044		1.10044		1.10044		1.10044		1.10044
			1.80956		0.46956		4.49		1.77		6.57956		1.31956	18	0.71		8.56	8	0.23		2.71	22	21	22.8896		6	13	8.01956				1.62956		0.51956		4.03956		1.31956		7.58956		2.32956
														23	0.91			6	0.14			22	28			9	15
														18	0.65			6	0.21			27	23			11	13
														19	0.68			11	0.39			24	28			7	12		1.54546
														29	1.18			13	0.45			23	28			7	13
		227	0.00797163	93	0.00504903	264	0.0170076	128	0.0138281	227	0.0289848	53	0.0248974	22	0.82	224	0.0382143	7	0.24	84	0.0322619	19	22	24.2	0.0472925	7	13	9.9	0.0405028		211	0.00772303	106	0.00490151	239	0.0169019	96	0.0137454	263	0.0288576	94	0.0247826	219	0.0380822	89	0.0321348	23.3	0.0471674
														17	0.53			4	0.1			26	22			5	16
														25	0.99			8	0.23			24	20			5	13
Average														224	8.56			84	2.71				484				198
22TR4R22	67	158	2.38	87	1.55	274	4.71	116	1.56	308	9.97	133	4.39	33	1.29			16	0.58			28	24	23.59		7	7	9.58			161	2.36	96	1.58	254	5.44	104	2.49	248	8.21	92	3.37	286	10.9	83	2.69	476	22.43
			1.10044		1.10044						1.10044		1.10044	34	1.31		320	12	0.41		123	27	19	1.10044		12	12	1.10044				1.10044		1.10044		1.10044		1.10044		1.10044		1.10044
			1.27956		0.44956		4.71		1.56		8.86956		3.28956	33	1.26		12.24	9	0.31		3.99	22	20	22.4896		7	18	8.47956				1.25956		0.47956		4.33956		1.38956		7.10956		2.26956
														36	1.38			16	0.56			23	26			9	7
														23	0.85			8	0.29			23	23			6	17
														28	1.13			6	0.21			26	28			9	10		1.54846
														30	1.07			10	0.32			26	27			8	12
		158	0.00809848	87	0.00516736	274	0.0171898	116	0.0134483	308	0.0287973	133	0.0247335	32	1.26	320	0.03825	16	0.38	123	0.032439	20	22	23.8	0.047247	5	11	10.4	0.0407671		161	0.00782335	96	0.00499542	254	0.0170849	104	0.0133612	248	0.0286676	92	0.0246691	286	0.0381119	83	0.0324096	23.8	0.0471218
														34	1.32			11	0.37			27	22			9	13
														37	1.37			19	0.56			21	22			14	15
Average														320	12.24			123	3.99				476				208
22TR4R23	69	199	2.68	70	1.45	251	4.33	155	2.03	215	7.31	73	2.92	25	0.96			14	0.46			29	28	24.01		10	10	9.32			197	2.63	98	1.58	236	5.15	129	2.77	228	7.66	86	3.23	234	8.95	92	2.97	477	22.8
			1.10044		1.10044						1.10044		1.10044	25	0.94		250	8	0.27		89	20	21	1.10044		14	6	1.10044				1.10044		1.10044		1.10044		1.10044		1.10044		1.10044
			1.57956		0.34956		4.33		2.03		6.20956		1.81956	24	0.81		9.59	7	0.24		2.88	24	26	22.9096		10	16	8.21956				1.52956		0.47956		4.04956		1.66956		6.55956		2.12956
														24	0.91			9	0.29			29	18			7	8
														27	1.11			14	0.44			30	20			12	7
														21	0.86			4	0.16			25	25			9	13		1.55646
														27	1.07			10	0.32			22	20			13	7
		199	0.00793749	70	0.00499371	251	0.017251	155	0.0130968	215	0.0288817	73	0.0249255	27	1.08	250	0.03836	8	0.25	89	0.0323596	22	25	23.9	0.0479279	9	6	10.25	0.0400954		197	0.00776426	98	0.00489347	236	0.0171592	129	0.0129423	228	0.02877	86	0.0247623	234	0.0382479	92	0.0322826	23.85	0.0477987
														26	0.99			7	0.19			26	18			8	9
														24	0.86			8	0.26			26	24			12	19
Average			0.00800253		0.00507003		0.0171495		0.0134577		0.0288879		0.0248521	250	9.59		0.0382748	89	2.88		0.0323535		478	23.9667	0.0474891		205	10.1833	0.0404551			0.00777022		0.00493013		0.0170487		0.0133496		0.0287651		0.024738		0.0381473		0.0322757	23.65	0.0473627
	TR4R1		0.00813967		0.00508386		0.0171749		0.0139796		0.0288106		0.0248996				0.0385156				0.032446				0.0468369				0.039287			0.00792639		0.00499585		0.01703		0.0138492		0.0287056		0.0248265		0.0383898		0.0323529		0.0467158
	TR4R1		0.00791841		0.00503429		0.0172868		0.0134646		0.0288502		0.0249084				0.038843				0.0325962				0.0474624				0.0403881			0.00772505		0.00495648		0.0171587		0.0133781		0.0287116		0.0248072		0.0387215		0.0325287		0.0473486
	TR4R1		0.00795255		0.0049535		0.0172532		0.0134234		0.0287602		0.0248509				0.0384034				0.0325882				0.0473227				0.0405397			0.00769005		0.00482379		0.0171351		0.0133289		0.02863		0.0248265		0.0382813		0.032625		0.0471908
	TR4R2		0.00797163		0.00504903		0.0170076		0.0138281		0.0289848		0.0248974				0.0382143				0.0322619				0.0472925				0.0405028			0.00772303		0.00490151		0.0169019		0.0137454		0.0288576		0.0247826		0.0380822		0.0321348		0.0471674
	TR4R2		0.00809848		0.00516736		0.0171898		0.0134483		0.0287973		0.0247335				0.03825				0.032439				0.047247				0.0407671			0.00782335		0.00499542		0.0170849		0.0133612		0.0286676		0.0246691		0.0381119		0.0324096		0.0471218
	TR4R2		0.00793749		0.00499371		0.017251		0.0130968		0.0288817		0.0249255				0.03836				0.0323596				0.0479279				0.0400954			0.00776426		0.00489347		0.0171592		0.0129423		0.02877		0.0247623		0.0382479		0.0322826		0.0477987
	TR6R1		0.00787976		0.00487571		0.0172558		0.0137755		0.0288066		0.0241275				0.0380769				0.0324359				0.0466442				0.0391348			0.00763204		0.0047445		0.0171406		0.0136215		0.0286994		0.0240579		0.0379675		0.0323171		0.0465106
	TR6R1		0.00785851		0.00505922		0.0171071		0.0132759		0.0287242		0.0244654				0.0379856				0.0325962				0.0468727				0.0396293			0.0075569		0.00493446		0.0169824		0.0131216		0.028599		0.0243156		0.0379149		0.0324242		0.0467532
	TR6R1		0.0079304		0.00506247		0.0170492		0.0134899		0.0286872		0.0241275				0.0382828				0.0325743				0.0466586				0.0382806			0.00774133		0.00488136		0.016917		0.0133781		0.0285507		0.0239706		0.0381455		0.0324096		0.0465376
	TR6R2		0.00790267		0.00522227		0.0170286		0.0132308		0.0285618		0.0240371				0.0371245				0.0318462				0.045254				0.0379751			0.00769645		0.00505241		0.0169104		0.0131416		0.0284433		0.0239416		0.0369903		0.0316867		0.0451209
	TR6R2		0.0077978		0.00499405		0.0171321		0.0134211		0.0287534		0.0239233				0.0370992				0.0319828				0.0450099				0.0374974			0.0075765		0.00486263		0.0169945		0.0133005		0.0286264		0.0238296		0.0369685		0.0319048		0.044878
	TR6R2		0.00800862		0.00504183		0.0169744		0.01375		0.0287284		0.0241792				0.0373913				0.0312857				0.0454496				0.0377274			0.00780513		0.00493888		0.0168671		0.0136413		0.0286264		0.0240179		0.0372727		0.0311236		0.0453258
	TR6R3		0.00823051		0.00572747		0.0172197		0.013622		0.027707		0.0225589				0.0360643				0.0292308				0.0429525				0.0334612			0.00800661		0.00563921		0.0170868		0.0135144		0.0275783		0.0224337		0.0359514		0.029186		0.0428271
	TR6R3		0.00828788		0.00559		0.0173404		0.0139216		0.0277167		0.0223153				0.0361983				0.0294937				0.0425561				0.0337385			0.00811288		0.00546		0.01722		0.0138321		0.0275998		0.0221376		0.0360793		0.0294565		0.0424256
	TR6R3		0.00841559		0.00569256		0.0172523		0.0131429		0.0276479		0.022326				0.0364851				0.0291837				0.0429967				0.0334934			0.00821204		0.00551625		0.0171285		0.0130387		0.0275469		0.0221675		0.0363819		0.0290805		0.042864
	TRL6R1		0.00796962		0.00513117		0.0165766		0.0120652		0.0281423		0.0232505				0.0370968				0.0313978				0.0460869				0.0376087			0.00775166		0.0050563		0.0164496		0.0119308		0.0279908		0.0231533		0.0369767		0.0313043		0.0459735
	TRL6R1		0.00800757		0.00506806		0.0167403		0.0123684		0.0282526		0.0232044				0.0370076				0.0315929				0.0464722				0.0387975			0.00774484		0.00492116		0.0166298		0.0122635		0.0281178		0.0230713		0.0368776		0.0315054		0.0463492
	TRL6R1		0.00783089		0.00499154		0.0168783		0.0121429		0.0284303		0.0231713				0.0370742				0.0316495				0.0460603				0.0382733			0.00761924		0.00486615		0.0167817		0.0120137		0.0282969		0.0230536		0.0369333		0.0314894		0.0459465
	TRL6R2		0.0081838		0.00495099		0.0173558		0.0146154		0.0286759		0.024884				0.0382143				0.0326214				0.047499				0.0404165			0.00800661		0.00499463		0.0172302		0.0145004		0.0285575		0.0247567		0.0380889		0.0324742		0.0473696
	TRL6R2		0.00808261		0.00523094		0.0174146		0.0140141		0.0288071		0.0247463				0.0382609				0.0327586				0.0475551				0.0404068			0.00790592		0.0051636		0.0173017		0.0138638		0.0286856		0.0246035		0.0381481		0.0326829		0.0474279
	TRL6R2		0.00778635		0.00505241		0.0175		0.013964		0.0286137		0.0247941				0.0383784				0.0321918				0.0469238				0.0398812			0.00761672		0.00494022		0.0173821		0.0138277		0.0284867		0.024646		0.0382684		0.0320253		0.0468009
	TRL6R3		0.00872224		0.00572327		0.0176126		0.0145588		0.0295502		0.0249572				0.0393562				0.0338983				0.0460368				0.0389425			0.00846754		0.00560776		0.0174873		0.0144853		0.0294353		0.0248408		0.039246		0.0338372		0.0459062
	TRL6R3		0.00860867		0.0058281		0.017598		0.0143373		0.0294839		0.0249908				0.0392576				0.0335556				0.046694				0.038157			0.00840916		0.00585701		0.017462		0.0142343		0.0293847		0.024814		0.0391324		0.0334568		0.0465733
	TRL6R3		0.00854589		0.00571059		0.0174479		0.0143609		0.0297686		0.0249108				0.0393798				0.0332727				0.0463421				0.0377413			0.00836327		0.00560336		0.0173312		0.0142015		0.0296662		0.0248094		0.0392469		0.0331646		0.0462241
	TRS6R1		0.00785062		0.004995		0.0167805		0.012069		0.028246		0.023065				0.0371359				0.0313793				0.0464867				0.0379636			0.00754979		0.00484404		0.016665		0.0119147		0.0281121		0.0229547		0.0370335		0.0312195		0.0463719
	TRS6R1		0.00812608		0.004936		0.0167727		0.0125203		0.0280674		0.0232085				0.0374453				0.0317197				0.0461664				0.037442			0.00798709		0.00480456		0.0166498		0.0123996		0.0279445		0.0230564		0.0373106		0.0316038		0.0460394
	TRS6R1		0.00798465		0.00514938		0.01672		0.0119388		0.0281285		0.0230054				0.0371315				0.0316667				0.045735				0.0372963			0.0077478		0.00499488		0.0165793		0.0120383		0.0280065		0.0230162		0.037012		0.0315663		0.0456109
	TRS6R2		0.00796962		0.00499436		0.0174569		0.0141803		0.0287303		0.0245501				0.0384874				0.0328				0.0464196				0.0397101			0.00772254		0.0048786		0.0173549		0.0140734		0.0286235		0.0243833		0.0383772		0.0326744		0.0463029
	TRS6R2		0.0080461		0.00499476		0.0174899		0.0141401		0.0283125		0.0244248				0.0382174				0.0322826				0.0458415				0.0390478			0.00785452		0.00482253		0.0173485		0.014108		0.0281677		0.0242805		0.0381385		0.0322222		0.0457269
	TRS6R2		0.00785006		0.00507238		0.0174043		0.0142683		0.0281838		0.0243218				0.0384				0.0321875				0.0462929				0.0386261			0.00764115		0.0050563		0.0172746		0.0141524		0.0280407		0.0241809		0.0382869		0.0320833		0.0461659
	TRS6R3		0.00822756		0.0052959		0.0174372		0.0143056		0.0293015		0.024855				0.0395556				0.0326667				0.0470231				0.0393195			0.00798774		0.00523854		0.0173185		0.0141809		0.0291744		0.0247623		0.0394954		0.0325581		0.0469011
	TRS6R3		0.00831213		0.00530979		0.017512		0.0143243		0.0290194		0.0249919				0.0391628				0.0328947				0.0471387				0.0388084			0.0081844		0.0051843		0.0174036		0.0142647		0.0288822		0.0248626		0.0390338		0.0328395		0.0470288
	TRS6R3		0.00838236		0.0053695		0.0174742		0.0144286		0.0291214		0.0248933				0.039122				0.0328205				0.047077				0.0388611			0.00821384		0.00521101		0.0173411		0.0143254		0.0290605		0.0248046		0.0389873		0.0326506		0.0469584
	T1R1		1.62793		1.01677		1.80704		1.77915		2.32714		2.184				1.94101				1.50929				1.66425				1.36819			1.58528		0.99917		1.82071		1.77067		2.33512		2.19547		1.93686		1.50528		1.66519
	T1R1		1.58368		1.00686		1.87368		1.68606		2.31268		2.28877				1.99855				1.53755				1.72388				1.55839			1.54501		0.991296		1.88673		1.68433		2.31059		2.28581		2.00197		1.54431		1.72544
	T1R1		1.59051		0.990701		1.86013		1.69398		2.3014		2.28549				1.92863				1.54748				1.78388				1.59029			1.53801		0.964759		1.88901		1.70102		2.29898		2.29953		1.93025		1.5597		1.78191
	T1R2		1.59433		1.00981		1.80719		1.75582		2.39545		2.21385				1.84589				1.47291				1.81564				1.64818			1.54461		0.980302		1.83578		1.76878		2.39114		2.20743		1.84491		1.47046		1.81704
	T1R2		1.6197		1.03347		1.81826		1.65618		2.3215		2.25705				1.89055				1.5411				1.79939				1.66562			1.56467		0.999083		1.85231		1.67315		2.31654		2.2616		1.88886		1.5481		1.80199
	T1R2		1.5875		0.998743		1.8627		1.62061		2.32614		2.36574				1.89567				1.48681				1.91359				1.54717			1.55285		0.978694		1.87898		1.60977		2.32217		2.364		1.89557		1.50406		1.91018
	T2R1		1.57595		0.975143		1.87521		1.77996		2.31016		2.07039				1.85406				1.66169				1.71346				1.33978			1.52641		0.9489		1.90171		1.77541		2.31176		2.08728		1.85362		1.65183		1.70863
	T2R1		1.5717		1.01184		1.84973		1.64333		2.32341		2.23791				1.85229				1.62615				1.77742				1.40662			1.51138		0.986892		1.8851		1.63742		2.32333		2.2388		1.86318		1.62174		1.76767
	T2R1		1.58608		1.01249		1.82376		1.68549		2.3276		2.12751				1.91913				1.68936				1.67515				1.14127			1.54827		0.976273		1.83513		1.69935		2.32675		2.11849		1.91895		1.68781		1.67844
	T2R2		1.58053		1.04445		1.82518		1.6017		2.30665		2.16127				1.71252				1.5618				1.62591				1.22578			1.53929		1.01048		1.84279		1.61784		2.30658		2.15999		1.7094		1.54903		1.62612
	T2R2		1.55956		0.998811		1.86686		1.6854		2.32426		2.10046				1.66918				1.61189				1.58213				1.10294			1.5153		0.972526		1.8836		1.68758		2.32637		2.10581		1.66843		1.61503		1.58191
	T2R2		1.60172		1.00837		1.79315		1.74163		2.35081		2.08584				1.73258				1.42131				1.61166				1.28833			1.56103		0.987775		1.81239		1.74047		2.35185		2.07534		1.72927		1.42113		1.61062
	T2R3		1.6461		1.14549		1.79784		1.57892		2.09746		1.78736				1.67144				1.33438				1.37764				0.846081			1.60132		1.12784		1.81603		1.57505		2.09831		1.78384		1.67463		1.35048		1.37514
	T2R3		1.65758		1.118		1.81051		1.66631		2.07526		1.67876				1.69632				1.43566				1.27155				0.848967			1.62258		1.092		1.82142		1.67442		2.07596		1.66111		1.6959		1.46378		1.26927
	T2R3		1.68312		1.13851		1.76733		1.49006		2.07912		1.83663				1.76746				1.37153				1.30231				0.861951			1.64241		1.10325		1.7833		1.50449		2.08367		1.82577		1.76701		1.38258		1.29641
	T3R1		1.59392		1.02623		1.72139		1.38681		2.31314		2.23705				1.7909				1.62947				1.79803				1.24216			1.55033		1.01126		1.73959		1.37489		2.30823		2.2445		1.7972		1.63022		1.79934
	T3R1		1.60151		1.01361		1.74655		1.46007		2.30246		2.1672				1.75099				1.6777				1.89293				1.44091			1.54897		0.984232		1.777		1.46847		2.29759		2.16156		1.75197		1.68682		1.89431
	T3R1		1.56618		0.998308		1.80948		1.43026		2.31041		2.20569				1.72878				1.69564				1.79721				1.32477			1.52385		0.973231		1.83249		1.42951		2.30304		2.20799		1.72728		1.68714		1.80264
	T3R2		1.63676		0.990198		1.83439		1.93288		2.26402		2.05372				1.90768				1.54747				1.85695				1.55903			1.60132		0.998927		1.84471		1.90115		2.26546		2.05125		1.90629		1.54351		1.85615
	T3R2		1.61652		1.04619		1.86641		1.75663		2.27849		2.14645				1.89076				1.60246				1.85884				1.52963			1.58118		1.03272		1.87916		1.74004		2.27677		2.14795		1.89252		1.61588		1.85596
	T3R2		1.55727		1.01048		1.94273		1.78231		2.22274		2.16603				1.95294				1.47953				1.70909				1.53788			1.52334		0.988044		1.95308		1.77749		2.22091		2.16368		1.95635		1.47585		1.7065
	T3R3		1.74445		1.14465		1.77807		1.76711		2.38752		2.07967				1.9612				1.78823				1.33612				1.00884			1.69351		1.12155		1.80395		1.77551		2.38961		2.0711		1.96214		1.79928		1.33203
	T3R3		1.72173		1.16562		1.79787		1.70185		2.37718		2.1307				1.95474				1.71294				1.48727				0.920292			1.68183		1.1714		1.81057		1.67547		2.38454		2.11593		1.94954		1.72856		1.48817
	T3R3		1.70918		1.14212		1.7804		1.73006		2.46414		2.10998				1.92224				1.67238				1.39244				0.893721			1.67265		1.12067		1.79359		1.71963		2.467		2.12158		1.91613		1.67103		1.39544
	T4R1		1.57012		0.999		1.78597		1.41479		2.2931		2.1992				1.77799				1.66287				1.87016				1.31686			1.50996		0.968808		1.82303		1.41414		2.28943		2.20799		1.78428		1.65296		1.86768
	T4R1		1.62522		0.9872		1.72933		1.51687		2.25894		2.13763				1.87556				1.70226				1.74424				1.14445			1.59742		0.960911		1.73255		1.51901		2.25893		2.13136		1.87323		1.70947		1.74576
	T4R1		1.59693		1.02988		1.74707		1.35788		2.2817		2.21333				1.80059				1.73225				1.7207				1.12593			1.54956		0.998977		1.7663		1.40868		2.28543		2.19559		1.8011		1.71		1.71978
	T4R2		1.59392		0.998872		1.89745		1.83719		2.25469		2.07395				1.95141				1.64998				1.58644				1.38202			1.54451		0.975721		1.92647		1.83896		2.25372		2.06197		1.95074		1.65823		1.58514
	T4R2		1.60922		0.998952		1.88876		1.82907		2.16452		2.05694				1.98098				1.57156				1.52482				1.35304			1.5709		0.964506		1.8988		1.8571		2.16383		2.03449		1.99417		1.58835		1.51767
	T4R2		1.57001		1.01448		1.91084		1.83918		2.15591		2.0107				2.04324				1.57314				1.57858				1.28771			1.52823		1.01126		1.9267		1.81921		2.15321		2.00571		2.04923		1.58048		1.57581
	T4R3		1.64551		1.05918		1.84193		1.80193		2.37286		2.10989				2.05082				1.56233				1.49351				1.33058			1.59755		1.04771		1.86615		1.78848		2.37118		2.11628		2.06421		1.55916		1.48114
	T4R3		1.66243		1.06196		1.83997		1.80291		2.30149		2.13351				2.02868				1.58058				1.59518				1.18274			1.63688		1.03686		1.84384		1.81608		2.29573		2.11958		2.03032		1.59537		1.599
	T4R3		1.67647		1.0739		1.81837		1.81181		2.32944		2.09295				2.0001				1.58544				1.591				1.20812			1.64277		1.0422		1.82546		1.82287		2.34388		2.09584		1.98536		1.56921		1.59422
	T1R1		1.60071	0.0238244	c		1.84695	0.035221	abc		2.31374	0.0129033	bc				1.95606	0.0373109	bc						1.724	0.0598124	b					1.5561	0.0255107	c		1.86548	0.0387892	abc		2.3149	0.0184512	bc		1.95636	0.0396377	bc		1.72418	0.0583668
	T2R2		1.60051	0.0169658	c		1.82938	0.0293805	bcd		2.3477	0.0414246	b				1.87737	0.0273808	de						1.84287	0.0617776	a					1.55404	0.0100849	c		1.85569	0.0217973	abc		2.34328	0.0415428	b		1.87645	0.0275182	de		1.84307	0.0586014
	AverageT1		1.60061				1.83817				2.33072						1.91672								1.78344							1.55507				1.86059				2.32909				1.9164				1.78362
	T2R1		1.57791	0.00738663	c		1.84956	0.0257273	abc		2.32039	0.0091006	bc				1.87516	0.0380901	de						1.72201	0.0516685	b					1.52869	0.018548	c		1.87398	0.0346572	ab		2.32061	0.0078556	bc		1.87858	0.035286	de		1.71825	0.0453876
	T2R2		1.58061	0.021082	c		1.82839	0.0369585	bcd		2.32724	0.0222286	bc				1.70476	0.0324069	g						1.60657	0.0223289	c					1.53854	0.0228724	c		1.84626	0.035732	bcd		2.32827	0.0226964	bc		1.70236	0.0310257	g		1.60622	0.0224313
	T2R3		1.66227	0.0189486	b		1.7919	0.0221952	cde		2.08395	0.0118612	f				1.71174	0.0498282	g						1.31717	0.0545858	d					1.6221	0.0205472	b		1.80692	0.0206326	cde		2.08598	0.0113509	f		1.71251	0.0483796	g		1.3136	0.0549897
	AverageT2		1.60693				1.82328				2.24386						1.76389								1.54858							1.56311				1.84239				2.24495				1.76449				1.54602
	T3R1		1.58721	0.0186019	c		1.75914	0.0453759	e		2.30867	0.00554655	bcd				1.75689	0.0314782	fg						1.82939	0.0550271	ab					1.54105	0.0149116	c		1.78303	0.0467459	de		2.30296	0.00532447	bcd		1.75882	0.0354573	fg		1.8321	0.0539046
	T3R2		1.60352	0.04131	c		1.88118	0.0556582	ab		2.25508	0.0289296	d				1.91713	0.0321468	cd						1.80829	0.0859193	ab					1.56862	0.0404796	c		1.89232	0.0553672	ab		2.25438	0.0295298	d		1.91838	0.0335899	cd		1.8062	0.0863441
	T3R3		1.72512	0.0178775	a		1.78545	0.010822	de		2.40961	0.0475057	a				1.94606	0.0208795	bc						1.40528	0.0763878	d					1.68266	0.0104521	a		1.8027	0.00855616	cde		2.41372	0.0462121	a		1.9426	0.0237784	bcd		1.40521	0.0785279
	AverageT3		1.63861				1.80859				2.32445						1.87336								1.68099							1.59744				1.82602				2.32368				1.87327				1.68117
	T4R1		1.59742	0.0275493	c		1.75412	0.0289736	e		2.27792	0.0173897	cd				1.81805	0.0510753	ef						1.77836	0.0803614	ab					1.55231	0.0437947	c		1.77396	0.0457273	e		2.27793	0.0165763	cd		1.81953	0.047255	ef		1.77774	0.0789651
	T4R2		1.59105	0.0197608	c		1.89902	0.0111238	a		2.19171	0.0547127	e				1.99188	0.0468736	ab						1.56328	0.0335387	c					1.54788	0.0215365	c		1.91732	0.0160385	a		2.19025	0.0552227	e		1.99805	0.0493629	ab		1.55954	0.0365609
	T4R3		1.66147	0.0155022	b		1.83342	0.0130687	bcd		2.3346	0.0359627	bc				2.02653	0.0254252	a						1.5599	0.0575327	c					1.62573	0.0245848	b		1.84515	0.0203765	bcd		2.33693	0.0382039	b		2.02663	0.0395517	a		1.55812	0.0667107
	AverageT4		1.61665				1.82885				2.26807						1.94549								1.63385							1.57531				1.84548				2.26837				1.94807				1.6318
T1R1					c				abc				bc						bc								b							c				abc				bc				bc
T1R1					c				bcd				b						de								a							c				abc				b				de
T1R1					c				abc				bc						de								b							c				ab				bc				de
T1R2					c				bcd				bc						g								c							c				bcd				bc				g
T1R2					b				cde				f						g								d							b				cde				f				g
T1R2					c				e				bcd						fg								ab							c				de				bcd				fg
T2R1					c				ab				d						cd								ab							c				ab				d				cd
T2R1					a				de				a						bc								d							a				cde				a				bcd
T2R1					c				e				cd						ef								ab							c				e				cd				ef
T2R2					c				a				e						ab								c							c				a				e				ab
T2R2					b				bcd				bc						a								c							b				bcd				b				a
T2R2
T2R3
T2R3	T1R1				1.00478	0.0131595	c		1.71973	0.0516096	abc		2.25275	0.0595614	a					1.53144	0.0198148	de						1.50563	0.120083	a				0.985075	0.0180294	c		1.71867	0.0457945	bc		2.26027	0.0565351	a		1.53643	0.0280491	de
T3R1	T2R2				1.01401	0.0177411	c		1.67754	0.0700871	cd		2.27888	0.0782645	a					1.50027	0.036032	e						1.62033	0.0639487	a				0.986026	0.0113362	c		1.6839	0.0800486	cd		2.27767	0.0795151	a		1.50754	0.0389399	e
T3R1	AverageT1				1.00939				1.69863				2.26582							1.51585								1.56298						0.985551				1.70129				2.26897				1.52198
T3R1	T2R1				0.999827	0.0213793	c		1.70293	0.0699639	bc		2.14527	0.0851602	bc					1.65906	0.0316863	abc						1.29589	0.138014	b				0.970688	0.0196018	c		1.70406	0.0691137	bc		2.14819	0.0800072	b		1.65379	0.0330785	abc
T3R2	T2R2				1.01721	0.0240727	c		1.67624	0.0704147	cd		2.11586	0.0400073	bc					1.53166	0.0987993	de						1.20568	0.0943164	b				0.990261	0.0191	c		1.68196	0.0615099	cd		2.11371	0.042878	bc		1.5284	0.0985838	de
T3R2	T2R3				1.134	0.0142908	a		1.57843	0.088128	d		1.76758	0.0807735	d					1.38053	0.0512363	f						0.852333	0.00845322	c				1.1077	0.01833	a		1.58465	0.0853709	d		1.75691	0.0855727	d		1.39895	0.0583969	f
T3R2	AverageT2				1.05035				1.65253				2.00957							1.52375								1.11797						1.02288				1.65689				2.00627				1.52705
T3R3	T3R1				1.01272	0.0139847	c		1.42572	0.0368427	e		2.20331	0.0349839	ab					1.6676	0.0342169	ab						1.33595	0.0998453	b				0.989574	0.019569	c		1.42429	0.0470066	e		2.20468	0.0415723	ab		1.66806	0.0327731	abc
T3R3	T3R2				1.01562	0.0283464	c		1.82394	0.095214	a		2.12207	0.0599937	bc					1.54315	0.0615777	de						1.54218	0.0151658	a				1.00656	0.023296	c		1.80623	0.0843151	ab		2.12096	0.0608776	bc		1.54508	0.0700259	de
T3R3	T3R3				1.1508	0.0128987	a		1.73301	0.0327292	abc		2.10678	0.0256643	bc					1.72452	0.058784	a						0.940952	0.0602767	c				1.13788	0.0290385	a		1.72353	0.0501359	bc		2.10287	0.0276543	bc		1.73296	0.0642339	a
T4R1	AverageT3				1.05971				1.66089				2.14406							1.64509								1.27303						1.04467				1.65135				2.14284				1.6487
T4R1	T4R1				1.00536	0.0220366	c		1.42985	0.0805543	e		2.18339	0.0402525	ab					1.69912	0.0347928	a						1.19575	0.105295	b				0.976232	0.0200893	c		1.44728	0.0621837	e		2.17831	0.041133	ab		1.69081	0.0327792	ab
T4R1	T4R2				1.0041	0.00898603	c		1.83515	0.00535563	a		2.0472	0.0327327	c					1.59823	0.0448264	bcd						1.34093	0.0483092	b				0.983829	0.0244085	c		1.83842	0.0189502	a		2.03406	0.0281321	c		1.60902	0.0427988	bcd
T4R2	T4R3				1.06501	0.00782083	b		1.80555	0.00544638	ab		2.11212	0.0203681	bc					1.57612	0.0121804	cde						1.24048	0.0790513	b				1.04226	0.00542348	b		1.80914	0.0182152	ab		2.11057	0.0128611	bc		1.57458	0.0186945	cde
T4R2	AverageT4				1.02482				1.69018				2.11423							1.62449								1.25905						1.00077				1.69828				2.10765				1.62481
T4R2
T4R3
T4R3							c				abc				a							de								a						c				bc				a				de
T4R3							c				cd				a							e								a						c				cd				a				e
							c				bc				bc							abc								b						c				bc				b				abc
							c				cd				bc							de								b						c				cd				bc				de
							a				d				d							f								c						a				d				d				f
							c				e				ab							ab								b						c				e				ab				abc
							c				a				bc							de								a						c				ab				bc				de
							a				abc				bc							a								c						a				bc				bc				a
							c				e				ab							a								b						c				e				ab				ab
							c				a				c							bcd								b						c				a				c				bcd
							b				ab				bc							cde								b						b				ab				bc				cde
		T1R1		1.60071	0.0238244	c	1.84695	0.035221	abc	2.31374	0.0129033	bc	1.95606	0.0373109	bc	1.724	0.0598124	b															1.5561	0.0255107	c	1.86548	0.0387892	abc	2.3149	0.0184512	bc	1.95636	0.0396377	bc	1.72418	0.0583668	b
		T2R2		1.60051	0.0169658	c	1.82938	0.0293805	bcd	2.3477	0.0414246	b	1.87737	0.0273808	de	1.84287	0.0617776	a															1.55404	0.0100849	c	1.85569	0.0217973	abc	2.34328	0.0415428	b	1.87645	0.0275182	de	1.84307	0.0586014	a
		AverageT1		1.60061			1.83817			2.33072			1.91672			1.78344																	1.55507			1.86059			2.32909			1.9164			1.78362
		T2R1		1.57791	0.00738663	c	1.84956	0.0257273	abc	2.32039	0.0091006	bc	1.87516	0.0380901	de	1.72201	0.0516685	b															1.52869	0.018548	c	1.87398	0.0346572	ab	2.32061	0.0078556	bc	1.87858	0.035286	de	1.71825	0.0453876	b
		T2R2		1.58061	0.021082	c	1.82839	0.0369585	bcd	2.32724	0.0222286	bc	1.70476	0.0324069	g	1.60657	0.0223289	c															1.53854	0.0228724	c	1.84626	0.035732	bcd	2.32827	0.0226964	bc	1.70236	0.0310257	g	1.60622	0.0224313	c
		T2R3		1.66227	0.0189486	b	1.7919	0.0221952	cde	2.08395	0.0118612	f	1.71174	0.0498282	g	1.31717	0.0545858	d															1.6221	0.0205472	b	1.80692	0.0206326	cde	2.08598	0.0113509	f	1.71251	0.0483796	g	1.3136	0.0549897	d
		AverageT2		1.60693	0		1.82328			2.24386			1.76389			1.54858																	1.56311			1.84239			2.24495			1.76449			1.54602
		T3R1		1.58721	0.0186019	c	1.75914	0.0453759	e	2.30867	0.00554655	bcd	1.75689	0.0314782	fg	1.82939	0.0550271	ab															1.54105	0.0149116	c	1.78303	0.0467459	de	2.30296	0.00532447	bcd	1.75882	0.0354573	fg	1.8321	0.0539046	ab
		T3R2		1.60352	0.04131	c	1.88118	0.0556582	ab	2.25508	0.0289296	d	1.91713	0.0321468	cd	1.80829	0.0859193	ab															1.56862	0.0404796	c	1.89232	0.0553672	ab	2.25438	0.0295298	d	1.91838	0.0335899	cd	1.8062	0.0863441	ab
		T3R3		1.72512	0.0178775	a	1.78545	0.010822	de	2.40961	0.0475057	a	1.94606	0.0208795	bc	1.40528	0.0763878	d															1.68266	0.0104521	a	1.8027	0.00855616	cde	2.41372	0.0462121	a	1.9426	0.0237784	bcd	1.40521	0.0785279	d
		AverageT3		1.63861			1.80859			2.32445			1.87336			1.68099																	1.59744			1.82602			2.32368			1.87327			1.68117
		T4R1		1.59742	0.0275493	c	1.75412	0.0289736	e	2.27792	0.0173897	cd	1.81805	0.0510753	ef	1.77836	0.0803614	ab															1.55231	0.0437947	c	1.77396	0.0457273	e	2.27793	0.0165763	cd	1.81953	0.047255	ef	1.77774	0.0789651	ab
		T4R2		1.59105	0.0197608	c	1.89902	0.0111238	a	2.19171	0.0547127	e	1.99188	0.0468736	ab	1.56328	0.0335387	c															1.54788	0.0215365	c	1.91732	0.0160385	a	2.19025	0.0552227	e	1.99805	0.0493629	ab	1.55954	0.0365609	c
		T4R3		1.66147	0.0155022	b	1.83342	0.0130687	bcd	2.3346	0.0359627	bc	2.02653	0.0254252	a	1.5599	0.0575327	c															1.62573	0.0245848	b	1.84515	0.0203765	bcd	2.33693	0.0382039	b	2.02663	0.0395517	a	1.55812	0.0667107	c
		AverageT4		1.61665	0		1.82885			2.26807			1.94549			1.63385																	1.57531			1.84548			2.26837			1.94807			1.6318
		T1R1		1.00478	0.0131595	c	1.71973	0.0516096	abc	2.25275	0.0595614	a	1.53144	0.0198148	de	1.50563	0.120083	a															0.985075	0.0180294	c	1.71867	0.0457945	bc	2.26027	0.0565351	a	1.53643	0.0280491	de	1.48808	0.111613	a
		T2R2		1.01401	0.0177411	c	1.67754	0.0700871	cd	2.27888	0.0782645	a	1.50027	0.036032	e	1.62033	0.0639487	a															0.986026	0.0113362	c	1.6839	0.0800486	cd	2.27767	0.0795151	a	1.50754	0.0389399	e	1.61124	0.0586873	a
		AverageT1		1.00939			1.69863			2.26582			1.51585			1.56298																	0.985551			1.70129			2.26897			1.52198			1.54966
		T2R1		0.999827	0.0213793	c	1.70293	0.0699639	bc	2.14527	0.0851602	bc	1.65906	0.0316863	abc	1.29589	0.138014	b															0.970688	0.0196018	c	1.70406	0.0691137	bc	2.14819	0.0800072	b	1.65379	0.0330785	abc	1.30154	0.132504	b
		T2R2		1.01721	0.0240727	c	1.67624	0.0704147	cd	2.11586	0.0400073	bc	1.53166	0.0987993	de	1.20568	0.0943164	b															0.990261	0.0191	c	1.68196	0.0615099	cd	2.11371	0.042878	bc	1.5284	0.0985838	de	1.21071	0.0993009	b
		T2R3		1.134	0.0142908	a	1.57843	0.088128	d	1.76758	0.0807735	d	1.38053	0.0512363	f	0.852333	0.00845322	c															1.1077	0.01833	a	1.58465	0.0853709	d	1.75691	0.0855727	d	1.39895	0.0583969	f	0.83715	0.0194581	c
		AverageT2		1.05035			1.65253			2.00957			1.52375			1.11797																	1.02288			1.65689			2.00627			1.52705			1.11647
		T3R1		1.01272	0.0139847	c	1.42572	0.0368427	e	2.20331	0.0349839	ab	1.6676	0.0342169	ab	1.33595	0.0998453	b															0.989574	0.019569	c	1.42429	0.0470066	e	2.20468	0.0415723	ab	1.66806	0.0327731	abc	1.33337	0.0972478	b
		T3R2		1.01562	0.0283464	c	1.82394	0.095214	a	2.12207	0.0599937	bc	1.54315	0.0615777	de	1.54218	0.0151658	a															1.00656	0.023296	c	1.80623	0.0843151	ab	2.12096	0.0608776	bc	1.54508	0.0700259	de	1.54559	0.0217263	a
		T3R3		1.1508	0.0128987	a	1.73301	0.0327292	abc	2.10678	0.0256643	bc	1.72452	0.058784	a	0.940952	0.0602767	c															1.13788	0.0290385	a	1.72353	0.0501359	bc	2.10287	0.0276543	bc	1.73296	0.0642339	a	0.933119	0.0567453	c
		AverageT3		1.05971			1.66089			2.14406			1.64509			1.27303																	1.04467			1.65135			2.14284			1.6487			1.27069
		T4R1		1.00536	0.0220366	c	1.42985	0.0805543	e	2.18339	0.0402525	ab	1.69912	0.0347928	a	1.19575	0.105295	b															0.976232	0.0200893	c	1.44728	0.0621837	e	2.17831	0.041133	ab	1.69081	0.0327792	ab	1.19682	0.11429	b
		T4R2		1.0041	0.00898603	c	1.83515	0.00535563	a	2.0472	0.0327327	c	1.59823	0.0448264	bcd	1.34093	0.0483092	b															0.983829	0.0244085	c	1.83842	0.0189502	a	2.03406	0.0281321	c	1.60902	0.0427988	bcd	1.33511	0.048532	b
		T4R3		1.06501	0.00782083	b	1.80555	0.00544638	ab	2.11212	0.0203681	bc	1.57612	0.0121804	cde	1.24048	0.0790513	b															1.04226	0.00542348	b	1.80914	0.0182152	ab	2.11057	0.0128611	bc	1.57458	0.0186945	cde	1.23635	0.0756878	b
		AverageT4		1.02482			1.69018			2.11423			1.62449			1.25905																	1.00077			1.69828			2.10765			1.62481			1.25609
	AT1R1
	AT1R1
	AT1R1
	AT1R2
	AT1R2
	AT1R2
	AT2R1
	AT2R1
	AT2R1
	AT2R2
	AT2R2
	AT2R2
	AT2R3
	AT2R3
	AT2R3
	AT3R1
	AT3R1
	AT3R1
	AT3R2
	AT3R2
	AT3R2
	AT3R3
	AT3R3
	AT3R3
	AT4R1
	AT4R1
	AT4R1
	AT4R2
	AT4R2
	AT4R2
	AT4R3
	AT4R3
	AT4R3
	BT1R1
	BT1R1
	BT1R1
	BT1R2
	BT1R2
	BT1R2
	BT2R1
	BT2R1
	BT2R1
	BT2R2
	BT2R2
	BT2R2
	BT2R3
	BT2R3
	BT2R3
	BT3R1
	BT3R1
	BT3R1
	BT3R2
	BT3R2
	BT3R2
	BT3R3
	BT3R3
	BT3R3
	BT4R1
	BT4R1
	BT4R1
	BT4R2
	BT4R2
	BT4R2
	BT4R3
	BT4R3
	BT4R3
		AT1R1		1.62793				1.80704				2.32714						1.94101								1.66425							1.58528				1.82071				2.33512				1.93686				1.66519
		AT1R1		1.58368				1.87368				2.31268						1.99855								1.72388							1.54501				1.88673				2.31059				2.00197				1.72544
		AT1R1		1.59051				1.86013				2.3014						1.92863								1.78388							1.53801				1.88901				2.29898				1.93025				1.78191
		AT1R2		1.59433				1.80719				2.39545						1.84589								1.81564							1.54461				1.83578				2.39114				1.84491				1.81704
		AT1R2		1.6197				1.81826				2.3215						1.89055								1.79939							1.56467				1.85231				2.31654				1.88886				1.80199
		AT1R2		1.5875				1.8627				2.32614						1.89567								1.91359							1.55285				1.87898				2.32217				1.89557				1.91018
		AT2R1		1.57595				1.87521				2.31016						1.85406								1.71346							1.52641				1.90171				2.31176				1.85362				1.70863
		AT2R1		1.5717				1.84973				2.32341						1.85229								1.77742							1.51138				1.8851				2.32333				1.86318				1.76767
		AT2R1		1.58608				1.82376				2.3276						1.91913								1.67515							1.54827				1.83513				2.32675				1.91895				1.67844
		AT2R2		1.58053				1.82518				2.30665						1.71252								1.62591							1.53929				1.84279				2.30658				1.7094				1.62612
		AT2R2		1.55956				1.86686				2.32426						1.66918								1.58213							1.5153				1.8836				2.32637				1.66843				1.58191
		AT2R2		1.60172				1.79315				2.35081						1.73258								1.61166							1.56103				1.81239				2.35185				1.72927				1.61062
		AT2R3		1.6461				1.79784				2.09746						1.67144								1.37764							1.60132				1.81603				2.09831				1.67463				1.37514
		AT2R3		1.65758				1.81051				2.07526						1.69632								1.27155							1.62258				1.82142				2.07596				1.6959				1.26927
		AT2R3		1.68312				1.76733				2.07912						1.76746								1.30231							1.64241				1.7833				2.08367				1.76701				1.29641
		AT3R1		1.59392				1.72139				2.31314						1.7909								1.79803							1.55033				1.73959				2.30823				1.7972				1.79934
		AT3R1		1.60151				1.74655				2.30246						1.75099								1.89293							1.54897				1.777				2.29759				1.75197				1.89431
		AT3R1		1.56618				1.80948				2.31041						1.72878								1.79721							1.52385				1.83249				2.30304				1.72728				1.80264
		AT3R2		1.63676				1.83439				2.26402						1.90768								1.85695							1.60132				1.84471				2.26546				1.90629				1.85615
		AT3R2		1.61652				1.86641				2.27849						1.89076								1.85884							1.58118				1.87916				2.27677				1.89252				1.85596
		AT3R2		1.55727				1.94273				2.22274						1.95294								1.70909							1.52334				1.95308				2.22091				1.95635				1.7065
		AT3R3		1.74445				1.77807				2.38752						1.9612								1.33612							1.69351				1.80395				2.38961				1.96214				1.33203
		AT3R3		1.72173				1.79787				2.37718						1.95474								1.48727							1.68183				1.81057				2.38454				1.94954				1.48817
		AT3R3		1.70918				1.7804				2.46414						1.92224								1.39244							1.67265				1.79359				2.467				1.91613				1.39544
		AT4R1		1.57012				1.78597				2.2931						1.77799								1.87016							1.50996				1.82303				2.28943				1.78428				1.86768
		AT4R1		1.62522				1.72933				2.25894						1.87556								1.74424							1.59742				1.73255				2.25893				1.87323				1.74576
		AT4R1		1.59693				1.74707				2.2817						1.80059								1.7207							1.54956				1.7663				2.28543				1.8011				1.71978
		AT4R2		1.59392				1.89745				2.25469						1.95141								1.58644							1.54451				1.92647				2.25372				1.95074				1.58514
		AT4R2		1.60922				1.88876				2.16452						1.98098								1.52482							1.5709				1.8988				2.16383				1.99417				1.51767
		AT4R2		1.57001				1.91084				2.15591						2.04324								1.57858							1.52823				1.9267				2.15321				2.04923				1.57581
		AT4R3		1.64551				1.84193				2.37286						2.05082								1.49351							1.59755				1.86615				2.37118				2.06421				1.48114
		AT4R3		1.66243				1.83997				2.30149						2.02868								1.59518							1.63688				1.84384				2.29573				2.03032				1.599
		AT4R3		1.67647				1.81837				2.32944						2.0001								1.591							1.64277				1.82546				2.34388				1.98536				1.59422
		BT1R1		1.47885				2.10845				2.46747						2.31423								1.66558							1.45145				2.11623				2.43197				2.34518				1.66698
		BT1R1		1.4704				2.10277				2.46032						2.36492								1.67535							1.44599				2.10298				2.42524				2.39754				1.67625
		BT1R1		1.45407				2.13471				2.50962						2.33506								1.655							1.43995				2.129				2.54686				2.29525				1.6523
		BT1R2		1.46112				2.12538				2.46273						2.36276								1.66092							1.4343				2.12296				2.46736				2.36447				1.65437
		BT1R2		1.46618				2.11782				2.53105						2.33251								1.65344							1.44189				2.1143				2.53337				2.33193				1.65421
		BT1R2		1.49082				2.08221				2.49245						2.29753								1.65241							1.4845				2.06				2.49897				2.29645				1.65205
		BT2R1		1.46979				2.10343				2.41023						2.30107								1.64608							1.44894				2.10133				2.4128				2.29853				1.64353
		BT2R1		1.45323				2.13693				2.43427						2.27716								1.63222							1.43143				2.13378				2.43442				2.27623				1.63232
		BT2R1		1.4678				2.12351				2.40139						2.24972								1.65702							1.43893				2.12586				2.40298				2.2527				1.65354
		BT2R2		1.47941				2.09362				2.37639						2.22968								1.65793							1.46055				2.08534				2.38261				2.2294				1.65485
		BT2R2		1.46894				2.11576				2.38983						2.20586								1.61983							1.45007				2.11204				2.38689				2.20685				1.6188
		BT2R2		1.45713				2.12853				2.39779						2.19433								1.61315							1.43628				2.12474				2.39781				2.1944				1.61357
		BT2R3		1.52387				2.04267				2.30302						2.18758								1.42041							1.51394				2.02709				2.30472				2.18424				1.42228
		BT2R3		1.51195				2.05743				2.28732						2.16165								1.43453							1.4906				2.05104				2.29295				2.15651				1.43746
		BT2R3		1.55509				2.01179				2.3296						2.13323								1.42913							1.53213				2.00577				2.33146				2.13994				1.4241
		BT3R1		1.47547				2.1099				2.39767						2.21613								1.65193							1.45186				2.10667				2.40163				2.213				1.6538
		BT3R1		1.44777				2.14068				2.41952						2.24096								1.64854							1.42809				2.13753				2.4172				2.24502				1.64665
		BT3R1		1.48956				2.10402				2.38254						2.22948								1.67446							1.45926				2.10547				2.39043				2.22131				1.68447
		BT3R2		1.50193				2.08392				2.35011						2.25451								1.67601							1.47378				2.08545				2.34862				2.25504				1.68073
		BT3R2		1.49255				2.09431				2.36082						2.2506								1.60594							1.47253				2.09196				2.36138				2.25035				1.60433
		BT3R2		1.49194				2.08512				2.3891						2.25606								1.60663							1.47114				2.08036				2.38905				2.25858				1.60535
		BT3R3		1.56607				2.03215				2.44274						2.34974								1.54759							1.54662				2.02901				2.4416				2.34992				1.54624
		BT3R3		1.52959				2.05495				2.44209						2.36341								1.563							1.50501				2.0594				2.43519				2.36404				1.56465
		BT3R3		1.53023				2.05993				2.44308						2.32328								1.58494							1.50807				2.05983				2.44021				2.31917				1.58856
		BT4R1		1.46491				2.1188				2.4012						2.22119								1.65344							1.44268				2.11655				2.3971				2.22854				1.65018
		BT4R1		1.45405				2.13216				2.39029						2.20751								1.67037							1.42809				2.1388				2.38337				2.20808				1.67154
		BT4R1		1.47007				2.11573				2.39724						2.19735								1.65208							1.44978				2.10757				2.40044				2.19731				1.65243
		BT4R2		1.49948				2.08261				2.3945						2.19824								1.6758							1.47877				2.08018				2.39602				2.19441				1.67743
		BT4R2		1.4814				2.10302				2.39804						2.21188								1.65039							1.46235				2.10003				2.39395				2.21245				1.65055
		BT4R2		1.48184				2.10239				2.39072						2.20538								1.65283							1.45995				2.10221				2.39157				2.20012				1.65369
		BT4R3		1.51864				2.07485				2.42996						2.34658								1.56285							1.49577				2.07402				2.42984				2.34398				1.56327
		BT4R3		1.5175				2.07656				2.42997						2.3452								1.55201							1.49255				2.07434				2.43275				2.34436				1.55095
		BT4R3		1.52699				2.06997				2.43934						2.33977								1.58129							1.50244				2.07875				2.42796				2.33831				1.58535
			T1R1	1.60071	0.0238244	c		1.84695	0.035221	fg		2.31374	0.0129033	hi				1.95606	0.0373109	fg						1.724	0.0598124	bc					1.5561	0.0255107	cd		1.86548	0.0387892	e		2.3149	0.0184512	fgh		1.95636	0.0396377	fg		1.72418
			T2R2	1.60051	0.0169658	c		1.82938	0.0293805	ghi		2.3477	0.0414246	fgh				1.87737	0.0273808	h						1.84287	0.0617776	a					1.55404	0.0100849	cd		1.85569	0.0217973	ef		2.34328	0.0415428	efg		1.87645	0.0275182	h		1.84307
			AverageT1	1.60061				1.83817				2.33072						1.91672								1.78344							1.55507				1.86059				2.32909				1.9164				1.78362
			T2R1	1.57791	0.00738663	c		1.84956	0.0257273	fg		2.32039	0.0091006	hi				1.87516	0.0380901	h						1.72201	0.0516685	bc					1.52869	0.018548	def		1.87398	0.0346572	de		2.32061	0.0078556	fgh		1.87858	0.035286	h		1.71825
			T2R2	1.58061	0.021082	c		1.82839	0.0369585	ghi		2.32724	0.0222286	gh				1.70476	0.0324069	k						1.60657	0.0223289	de					1.53854	0.0228724	cde		1.84626	0.035732	efg		2.32827	0.0226964	fgh		1.70236	0.0310257	k		1.60622
			T2R3	1.66227	0.0189486	b		1.7919	0.0221952	hij		2.08395	0.0118612	l				1.71174	0.0498282	jk						1.31717	0.0545858	g					1.6221	0.0205472	b		1.80692	0.0206326	fgh		2.08598	0.0113509	k		1.71251	0.0483796	jk		1.3136
			AverageT2	1.60693				1.82328				2.24386						1.76389								1.54858							1.56311				1.84239				2.24495				1.76449				1.54602
			T3R1	1.58721	0.0186019	c		1.75914	0.0453759	j		2.30867	0.00554655	hi				1.75689	0.0314782	j						1.82939	0.0550271	a					1.54105	0.0149116	cde		1.78303	0.0467459	h		2.30296	0.00532447	ghi		1.75882	0.0354573	j		1.8321
			T3R2	1.60352	0.04131	c		1.88118	0.0556582	ef		2.25508	0.0289296	j				1.91713	0.0321468	gh						1.80829	0.0859193	a					1.56862	0.0404796	c		1.89232	0.0553672	de		2.25438	0.0295298	i		1.91838	0.0335899	gh		1.8062
			T3R3	1.72512	0.0178775	a		1.78545	0.010822	ij		2.40961	0.0475057	cde				1.94606	0.0208795	fg						1.40528	0.0763878	f					1.68266	0.0104521	a		1.8027	0.00855616	gh		2.41372	0.0462121	cd		1.9426	0.0237784	g		1.40521
			AverageT3	1.63861				1.80859				2.32445						1.87336								1.68099							1.59744				1.82602				2.32368				1.87327				1.68117
			T4R1	1.59742	0.0275493	c		1.75412	0.0289736	j		2.27792	0.0173897	ij				1.81805	0.0510753	i						1.77836	0.0803614	ab					1.55231	0.0437947	cd		1.77396	0.0457273	h		2.27793	0.0165763	hi		1.81953	0.047255	i		1.77774
			T4R2	1.59105	0.0197608	c		1.89902	0.0111238	e		2.19171	0.0547127	k				1.99188	0.0468736	ef						1.56328	0.0335387	e					1.54788	0.0215365	cde		1.91732	0.0160385	d		2.19025	0.0552227	j		1.99805	0.0493629	ef		1.55954
			T4R3	1.66147	0.0155022	b		1.83342	0.0130687	gh		2.3346	0.0359627	gh				2.02653	0.0254252	e						1.5599	0.0575327	e					1.62573	0.0245848	b		1.84515	0.0203765	efg		2.33693	0.0382039	fg		2.02663	0.0395517	e		1.55812
			AverageT4	1.61665				1.82885				2.26807						1.94549								1.63385							1.57531				1.84548				2.26837				1.94807				1.6318
			T1R1	1.46777	0.0125941	f		2.11531	0.0170386	ab		2.47913	0.0266408	ab				2.33807	0.0254779	a						1.66531	0.0101776	cd					1.4458	0.00575219	h		2.11607	0.0130132	a		2.46802	0.0683591	ab		2.34599	0.0511519	a		1.66518
			T2R2	1.4727	0.0158919	f		2.10847	0.0230535	ab		2.49541	0.0342564	a				2.33093	0.0326433	a						1.65559	0.00464548	cd					1.45357	0.0270593	h		2.09909	0.0341242	ab		2.4999	0.0330125	a		2.33095	0.0340228	a		1.65354
			AverageT1	1.47024				2.11189				2.48727						2.3345								1.66045							1.44968				2.10758				2.48396				2.33847				1.65936
			T2R1	1.46361	0.00904278	f		2.12129	0.0168634	ab		2.4153	0.0170115	cd				2.27598	0.0256924	b						1.64511	0.0124273	cde					1.43977	0.008786	h		2.12032	0.0169197	a		2.41673	0.0160838	cd		2.27582	0.0229224	b		1.64313
			T2R2	1.46849	0.0111484	f		2.11264	0.017662	ab		2.388	0.0108176	def				2.20996	0.0180287	cd						1.63031	0.0241589	de					1.44896	0.012175	h		2.10737	0.0201122	a		2.3891	0.00783695	cde		2.21022	0.0177391	cd		1.62908
			T2R3	1.5303	0.0222781	d		2.0373	0.0232894	d		2.30664	0.0213723	hi				2.16082	0.0271871	d						1.42803	0.00712541	f					1.51223	0.0208166	ef		2.02797	0.0226498	c		2.30971	0.0197329	gh		2.16023	0.0223832	d		1.42795
			AverageT2	1.48747				2.09041				2.36998						2.21559								1.56781							1.46699				2.08522				2.37185				2.21542				1.56672
			T3R1	1.47093	0.0212606	f		2.1182	0.0196864	ab		2.39991	0.0185897	cde				2.22886	0.0124255	bc						1.65831	0.0140875	cd					1.4464	0.0162881	h		2.11656	0.0181757	a		2.40309	0.0134467	cd		2.22644	0.0166179	bc		1.66164
			T3R2	1.49547	0.00560324	ef		2.08778	0.00568012	abc		2.36667	0.0201455	efg				2.25373	0.00281272	bc						1.62953	0.0402592	de					1.47248	0.00131961	gh		2.08592	0.00581502	ab		2.36635	0.0206696	def		2.25466	0.00412734	bc		1.63013
			T3R3	1.54196	0.0208774	d		2.04901	0.0148145	cd		2.44264	0.000503613	bc				2.34548	0.0204032	a						1.56518	0.0187682	e					1.5199	0.0231887	def		2.04941	0.017666	bc		2.439	0.00337086	bc		2.34437	0.0229403	a		1.56648
			AverageT3	1.50279				2.085				2.40307						2.27602								1.61767							1.4796				2.08396				2.40281				2.27516				1.61942
			T4R1	1.46301	0.00818011	f		2.12223	0.00873713	a		2.39624	0.0055263	cde				2.20868	0.0119621	cd						1.65863	0.0101891	cd					1.44018	0.0110588	h		2.12097	0.016077	a		2.39364	0.00904783	cde		2.21131	0.0158659	cd		1.65805
			T4R2	1.48757	0.0103137	f		2.09601	0.0116047	ab		2.39442	0.00366174	de				2.20517	0.00682079	cd						1.65967	0.0140235	cd					1.46702	0.0102429	gh		2.09414	0.0121377	ab		2.39384	0.00222512	cde		2.20233	0.00921719	cd		1.66055
			T4R3	1.52104	0.00518061	de		2.07379	0.00342115	bcd		2.43309	0.00540784	cd				2.34385	0.0035985	a						1.56539	0.0148031	e					1.49692	0.00504404	fg		2.0757	0.00264188	ab		2.43019	0.00241382	bc		2.34222	0.00339016	a		1.56652
			AverageT4	1.49054				2.09734				2.40792						2.25257								1.6279							1.46804				2.09694				2.40589				2.25195				1.62838
						c				fg				hi						fg								bc							cd				e				fgh				fg
						c				ghi				fgh						h								a							cd				ef				efg				h
						c				fg				hi						h								bc							def				de				fgh				h
						c				ghi				gh						k								de							cde				efg				fgh				k
						b				hij				l						jk								g							b				fgh				k				jk
						c				j				hi						j								a							cde				h				ghi				j
						c				ef				j						gh								a							c				de				i				gh
						a				ij				cde						fg								f							a				gh				cd				g
						c				j				ij						i								ab							cd				h				hi				i
						c				e				k						ef								e							cde				d				j				ef
						b				gh				gh						e								e							b				efg				fg				e
						f				ab				ab						a								cd							h				a				ab				a
						f				ab				a						a								cd							h				ab				a				a
						f				ab				cd						b								cde							h				a				cd				b
						f				ab				def						cd								de							h				a				cde				cd
						d				d				hi						d								f							ef				c				gh				d
						f				ab				cde						bc								cd							h				a				cd				bc
						ef				abc				efg						bc								de							gh				ab				def				bc
						d				cd				bc						a								e							def				bc				bc				a
						f				a				cde						cd								cd							h				a				cde				cd
						f				ab				de						cd								cd							gh				ab				cde				cd
						de				bcd				cd						a								e							fg				ab				bc				a
						1.01677				1.77915				2.184								1.50929								1.36819					0.99917				1.77067				2.19547				1.50528
						1.00686				1.68606				2.28877								1.53755								1.55839					0.991296				1.68433				2.28581				1.54431
						0.990701				1.69398				2.28549								1.54748								1.59029					0.964759				1.70102				2.29953				1.5597
						1.00981				1.75582				2.21385								1.47291								1.64818					0.980302				1.76878				2.20743				1.47046
						1.03347				1.65618				2.25705								1.5411								1.66562					0.999083				1.67315				2.2616				1.5481
						0.998743				1.62061				2.36574								1.48681								1.54717					0.978694				1.60977				2.364				1.50406
						0.975143				1.77996				2.07039								1.66169								1.33978					0.9489				1.77541				2.08728				1.65183
						1.01184				1.64333				2.23791								1.62615								1.40662					0.986892				1.63742				2.2388				1.62174
						1.01249				1.68549				2.12751								1.68936								1.14127					0.976273				1.69935				2.11849				1.68781
						1.04445				1.6017				2.16127								1.5618								1.22578					1.01048				1.61784				2.15999				1.54903
						0.998811				1.6854				2.10046								1.61189								1.10294					0.972526				1.68758				2.10581				1.61503
						1.00837				1.74163				2.08584								1.42131								1.28833					0.987775				1.74047				2.07534				1.42113
						1.14549				1.57892				1.78736								1.33438								0.846081					1.12784				1.57505				1.78384				1.35048
						1.118				1.66631				1.67876								1.43566								0.848967					1.092				1.67442				1.66111				1.46378
						1.13851				1.49006				1.83663								1.37153								0.861951					1.10325				1.50449				1.82577				1.38258
						1.02623				1.38681				2.23705								1.62947								1.24216					1.01126				1.37489				2.2445				1.63022
						1.01361				1.46007				2.1672								1.6777								1.44091					0.984232				1.46847				2.16156				1.68682
						0.998308				1.43026				2.20569								1.69564								1.32477					0.973231				1.42951				2.20799				1.68714
						0.990198				1.93288				2.05372								1.54747								1.55903					0.998927				1.90115				2.05125				1.54351
						1.04619				1.75663				2.14645								1.60246								1.52963					1.03272				1.74004				2.14795				1.61588
						1.01048				1.78231				2.16603								1.47953								1.53788					0.988044				1.77749				2.16368				1.47585
						1.14465				1.76711				2.07967								1.78823								1.00884					1.12155				1.77551				2.0711				1.79928
						1.16562				1.70185				2.1307								1.71294								0.920292					1.1714				1.67547				2.11593				1.72856
						1.14212				1.73006				2.10998								1.67238								0.893721					1.12067				1.71963				2.12158				1.67103
						0.999				1.41479				2.1992								1.66287								1.31686					0.968808				1.41414				2.20799				1.65296
						0.9872				1.51687				2.13763								1.70226								1.14445					0.960911				1.51901				2.13136				1.70947
						1.02988				1.35788				2.21333								1.73225								1.12593					0.998977				1.40868				2.19559				1.71
						0.998872				1.83719				2.07395								1.64998								1.38202					0.975721				1.83896				2.06197				1.65823
						0.998952				1.82907				2.05694								1.57156								1.35304					0.964506				1.8571				2.03449				1.58835
						1.01448				1.83918				2.0107								1.57314								1.28771					1.01126				1.81921				2.00571				1.58048
						1.05918				1.80193				2.10989								1.56233								1.33058					1.04771				1.78848				2.11628				1.55916
						1.06196				1.80291				2.13351								1.58058								1.18274					1.03686				1.81608				2.11958				1.59537
						1.0739				1.81181				2.09295								1.58544								1.20812					1.0422				1.82287				2.09584				1.56921
						0.876421				1.89586				2.3179								1.8318								1.63236					0.846024				1.896				2.31483				1.84021
						0.861882				1.89899				2.31549								1.8542								1.6505					0.826575				1.90289				2.32673				1.84857
						0.890017				1.87421				2.30943								1.82108								1.62928					0.869556				1.87546				2.30508				1.83063
						0.862411				1.90075				2.287								1.8464								1.64428					0.844069				1.89442				2.29092				1.85194
						0.8739				1.89081				2.29354								1.81132								1.63198					0.844454				1.9028				2.2834				1.81062
						0.856176				1.91095				2.32037								1.82864								1.64203					0.822494				1.92435				2.30893				1.83132
						0.856481				1.91495				2.28331								1.87119								1.63017					0.837257				1.90698				2.29738				1.86579
						0.870416				1.87788				2.26195								1.96236								1.56248					0.840299				1.8935				2.26518				1.95598
						0.860552				1.90611				2.25719								1.92853								1.54533					0.844454				1.89757				2.26684				1.92765
						0.875507				1.87594				2.23778								1.83533								1.58491					0.859442				1.87048				2.22836				1.84905
						0.876976				1.89226				2.22997								1.9019								1.55199					0.849563				1.89702				2.22914				1.89297
						0.872317				1.8929				2.22622								1.91368								1.50254					0.844454				1.89691				2.22471				1.91582
						0.917469				1.82379				2.15966								1.73676								1.38675					0.883284				1.82545				2.16895				1.7484
						0.931867				1.82489				2.14552								1.74637								1.40908					0.918529				1.82463				2.12977				1.74776
						0.933826				1.7884				2.20772								1.69075								1.38724					0.92211				1.76732				2.22208				1.68108
						0.874214				1.89662				2.30126								1.79388								1.57367					0.859442				1.87873				2.30731				1.80067
						0.86829				1.89604				2.27729								1.81789								1.61121					0.842313				1.90427				2.26344				1.81756
						0.846054				1.91428				2.26976								1.83783								1.62765					0.835837				1.89231				2.28054				1.8428
						0.89912				1.85846				2.25341								1.80061								1.72246					0.882698				1.85192				2.25416				1.7991
						0.885364				1.87723				2.28888								1.75752								1.61388					0.859269				1.87137				2.2916				1.76623
						0.874083				1.88928				2.3099								1.73806								1.67391					0.852585				1.88348				2.31256				1.74345
						0.937185				1.84176				2.32741								1.79989								1.49656					0.903714				1.86013				2.31048				1.80068
						0.941462				1.83212				2.35004								1.77834								1.51793					0.923785				1.83264				2.33557				1.7946
						0.94529				1.83378				2.34181								1.79677								1.55631					0.927524				1.82377				2.34519				1.79508
						0.872552				1.89215				2.27397								1.82058								1.57191					0.856176				1.87811				2.28113				1.81953
						0.879927				1.88279				2.28655								1.81688								1.61682					0.849563				1.88745				2.28137				1.8209
						0.841333				1.92057				2.275								1.79442								1.59574					0.82513				1.91989				2.26291				1.79952
						0.885962				1.87663				2.26948								1.81079								1.60029					0.85325				1.89208				2.26407				1.8095
						0.901366				1.86054				2.2479								1.80838								1.59609					0.882698				1.86232				2.23178				1.8232
						0.886191				1.87571				2.26693								1.79236								1.61466					0.870416				1.86327				2.26548				1.79495
						0.92036				1.85671				2.32388								1.74116								1.49996					0.89554				1.85377				2.32818				1.73059
						0.910133				1.86764				2.3141								1.76527								1.50615					0.890348				1.86104				2.32618				1.76454
						0.923698				1.85537				2.32785								1.76265								1.51219					0.89235				1.86819				2.31713				1.7587
					T1R1	1.00478	0.0131595	c		1.71973	0.0516096	e		2.25275	0.0595614	bcd						1.53144	0.0198148	ij						1.50563	0.120083	c			0.985075	0.0180294	de		1.71867	0.0457945	d		2.26027	0.0565351	abc		1.53643	0.0280491	jk
					T2R2	1.01401	0.0177411	c		1.67754	0.0700871	e		2.27888	0.0782645	abcd						1.50027	0.036032	j						1.62033	0.0639487	abc			0.986026	0.0113362	de		1.6839	0.0800486	d		2.27767	0.0795151	abc		1.50754	0.0389399	k
					AverageT1	1.00939				1.69863				2.26582								1.51585								1.56298					0.985551				1.70129				2.26897				1.52198
					T2R1	0.999827	0.0213793	c		1.70293	0.0699639	e		2.14527	0.0851602	gh						1.65906	0.0316863	gh						1.29589	0.138014	def			0.970688	0.0196018	e		1.70406	0.0691137	d		2.14819	0.0800072	ef		1.65379	0.0330785	hi
					T2R2	1.01721	0.0240727	c		1.67624	0.0704147	e		2.11586	0.0400073	hi						1.53166	0.0987993	ij						1.20568	0.0943164	f			0.990261	0.0191	de		1.68196	0.0615099	d		2.11371	0.042878	f		1.5284	0.0985838	k
					T2R3	1.134	0.0142908	a		1.57843	0.088128	f		1.76758	0.0807735	j						1.38053	0.0512363	k						0.852333	0.00845322	g			1.1077	0.01833	b		1.58465	0.0853709	e		1.75691	0.0855727	h		1.39895	0.0583969	l
					AverageT2	1.05035				1.65253				2.00957								1.52375								1.11797					1.02288				1.65689				2.00627				1.52705
					T3R1	1.01272	0.0139847	c		1.42572	0.0368427	g		2.20331	0.0349839	defg						1.6676	0.0342169	g						1.33595	0.0998453	de			0.989574	0.019569	de		1.42429	0.0470066	f		2.20468	0.0415723	cde		1.66806	0.0327731	ghi
					T3R2	1.01562	0.0283464	c		1.82394	0.095214	abc		2.12207	0.0599937	h						1.54315	0.0615777	ij						1.54218	0.0151658	bc			1.00656	0.023296	d		1.80623	0.0843151	c		2.12096	0.0608776	f		1.54508	0.0700259	jk
					T3R3	1.1508	0.0128987	a		1.73301	0.0327292	de		2.10678	0.0256643	hi						1.72452	0.058784	efg						0.940952	0.0602767	g			1.13788	0.0290385	a		1.72353	0.0501359	d		2.10287	0.0276543	fg		1.73296	0.0642339	efg
					AverageT3	1.05971				1.66089				2.14406								1.64509								1.27303					1.04467				1.65135				2.14284				1.6487
					T4R1	1.00536	0.0220366	c		1.42985	0.0805543	g		2.18339	0.0402525	efgh						1.69912	0.0347928	fg						1.19575	0.105295	f			0.976232	0.0200893	de		1.44728	0.0621837	f		2.17831	0.041133	def		1.69081	0.0327792	fgh
					T4R2	1.0041	0.00898603	c		1.83515	0.00535563	abc		2.0472	0.0327327	i						1.59823	0.0448264	hi						1.34093	0.0483092	de			0.983829	0.0244085	de		1.83842	0.0189502	abc		2.03406	0.0281321	g		1.60902	0.0427988	ij
					T4R3	1.06501	0.00782083	b		1.80555	0.00544638	cd		2.11212	0.0203681	hi						1.57612	0.0121804	i						1.24048	0.0790513	ef			1.04226	0.00542348	c		1.80914	0.0182152	bc		2.11057	0.0128611	f		1.57458	0.0186945	jk
					AverageT4	1.02482				1.69018				2.11423								1.62449								1.25905					1.00077				1.69828				2.10765				1.62481
					T1R1	0.876107	0.0140699	ef		1.88968	0.0134919	abc		2.31427	0.00436857	ab						1.83569	0.0168957	bc						1.63738	0.0114665	ab			0.847385	0.0215227	h		1.89145	0.0142666	abc		2.31555	0.0108431	a		1.8398	0.00897425	bc
					T2R2	0.864162	0.00899093	ef		1.90083	0.0100711	ab		2.3003	0.0176845	abc						1.82878	0.017541	bcd						1.63943	0.00655022	ab			0.837006	0.0125688	h		1.90719	0.0154374	a		2.29442	0.0131202	ab		1.83129	0.0206623	bc
					AverageT1	0.870134				1.89526				2.30729								1.83224								1.6384					0.842195				1.89932				2.30498				1.83555
					T2R1	0.862483	0.00716524	f		1.89965	0.0193596	ab		2.26748	0.0139142	abcd						1.92069	0.0460878	a						1.57933	0.0448582	abc			0.84067	0.00361254	h		1.89935	0.00691493	a		2.27647	0.0181325	abc		1.91647	0.0461215	a
					T2R2	0.874933	0.00238145	ef		1.88703	0.00961212	abc		2.23132	0.00590103	cdef						1.88364	0.0422438	ab						1.54648	0.0414629	bc			0.851153	0.00761953	h		1.88814	0.0152905	abc		2.2274	0.00236639	bcd		1.88595	0.0339338	ab
					T2R3	0.927721	0.0089318	d		1.81236	0.0207593	bc		2.17097	0.0326053	fgh						1.72463	0.029732	efg						1.39436	0.012751	d			0.907974	0.0214571	f		1.8058	0.0333282	c		2.1736	0.0463308	def		1.72575	0.0386823	efgh
					AverageT2	0.888379				1.86635				2.22326								1.84298								1.50672					0.866599				1.86443				2.22582				1.84272
					T3R1	0.862853	0.0148466	f		1.90231	0.0103653	a		2.28277	0.0164519	abc						1.81653	0.0220064	bcd						1.60418	0.0276703	abc			0.845864	0.0121966	h		1.89177	0.0127788	abc		2.28376	0.0221163	abc		1.82034	0.021204	bcd
					T3R2	0.886189	0.0125387	ef		1.87499	0.0155315	abc		2.28407	0.0285507	abc						1.76539	0.0320082	cdef						1.67009	0.054391	a			0.864851	0.0158131	gh		1.86892	0.0159219	abc		2.28611	0.0295849	ab		1.76959	0.0279767	cde
					T3R3	0.941312	0.00405463	d		1.83589	0.00515386	abc		2.33975	0.0114543	a						1.79167	0.0116494	cdef						1.5236	0.0302758	bc			0.918341	0.0128043	f		1.83885	0.0189561	abc		2.33041	0.0179218	a		1.79678	0.00337983	cde
					AverageT3	0.896785				1.87106				2.3022								1.7912								1.59929					0.876352				1.86651				2.3001				1.79557
					T4R1	0.864604	0.0204875	ef		1.8985	0.019677	ab		2.27851	0.00698687	abcd						1.81063	0.0141566	cd						1.59483	0.022471	abc			0.843623	0.0163529	h		1.89515	0.0219253	ab		2.27514	0.0105884	abc		1.81332	0.0119671	bcd
					T4R2	0.891173	0.00882789	e		1.87096	0.00903651	abc		2.26143	0.0117891	abcd						1.80384	0.0100169	cd						1.60368	0.0097363	abc			0.868788	0.0147912	gh		1.87256	0.0169161	abc		2.25378	0.0190613	abc		1.80921	0.0141282	cd
					T4R3	0.918064	0.00706782	d		1.85991	0.00673257	abc		2.32194	0.00707697	ab						1.75636	0.0132288	def						1.5061	0.00611318	c			0.892746	0.00261879	fg		1.861	0.00720784	abc		2.32383	0.00589238	a		1.75127	0.0181533	def
					AverageT4	0.89128				1.87646				2.2873								1.79027								1.5682					0.868386				1.87624				2.28425				1.79127
								c				e				bcd								ij								c					de				d				abc				jk
								c				e				abcd								j								abc					de				d				abc				k
								c				e				gh								gh								def					e				d				ef				hi
								c				e				hi								ij								f					de				d				f				k
								a				f				j								k								g					b				e				h				l
								c				g				defg								g								de					de				f				cde				ghi
								c				abc				h								ij								bc					d				c				f				jk
								a				de				hi								efg								g					a				d				fg				efg
								c				g				efgh								fg								f					de				f				def				fgh
								c				abc				i								hi								de					de				abc				g				ij
								b				cd				hi								i								ef					c				bc				f				jk
								ef				abc				ab								bc								ab					h				abc				a				bc
								ef				ab				abc								bcd								ab					h				a				ab				bc
								f				ab				abcd								a								abc					h				a				abc				a
								ef				abc				cdef								ab								bc					h				abc				bcd				ab
								d				bc				fgh								efg								d					f				c				def				efgh
								f				a				abc								bcd								abc					h				abc				abc				bcd
								ef				abc				abc								cdef								a					gh				abc				ab				cde
								d				abc				a								cdef								bc					f				abc				a				cde
								ef				ab				abcd								cd								abc					h				ab				abc				bcd
								e				abc				abcd								cd								abc					gh				abc				abc				cd
								d				abc				ab								def								c					fg				abc				a				def
			T1R1	1.60071	0.0238244	c	1.84695	0.035221	fg	2.31374	0.0129033	hi	1.95606	0.0373109	fg	1.724	0.0598124	bc
			T2R2	1.60051	0.0169658	c	1.82938	0.0293805	ghi	2.3477	0.0414246	fgh	1.87737	0.0273808	h	1.84287	0.0617776	a
			AverageT1	1.60061			1.83817			2.33072			1.91672			1.78344
			T2R1	1.57791	0.00738663	c	1.84956	0.0257273	fg	2.32039	0.0091006	hi	1.87516	0.0380901	h	1.72201	0.0516685	bc
			T2R2	1.58061	0.021082	c	1.82839	0.0369585	ghi	2.32724	0.0222286	gh	1.70476	0.0324069	k	1.60657	0.0223289	de
			T2R3	1.66227	0.0189486	b	1.7919	0.0221952	hij	2.08395	0.0118612	l	1.71174	0.0498282	jk	1.31717	0.0545858	g
			AverageT2	1.60693			1.82328			2.24386			1.76389			1.54858
			T3R1	1.58721	0.0186019	c	1.75914	0.0453759	j	2.30867	0.00554655	hi	1.75689	0.0314782	j	1.82939	0.0550271	a
			T3R2	1.60352	0.04131	c	1.88118	0.0556582	ef	2.25508	0.0289296	j	1.91713	0.0321468	gh	1.80829	0.0859193	a
			T3R3	1.72512	0.0178775	a	1.78545	0.010822	ij	2.40961	0.0475057	cde	1.94606	0.0208795	fg	1.40528	0.0763878	f
			AverageT3	1.63861			1.80859			2.32445			1.87336			1.68099
			T4R1	1.59742	0.0275493	c	1.75412	0.0289736	j	2.27792	0.0173897	ij	1.81805	0.0510753	i	1.77836	0.0803614	ab
			T4R2	1.59105	0.0197608	c	1.89902	0.0111238	e	2.19171	0.0547127	k	1.99188	0.0468736	ef	1.56328	0.0335387	e
			T4R3	1.66147	0.0155022	b	1.83342	0.0130687	gh	2.3346	0.0359627	gh	2.02653	0.0254252	e	1.5599	0.0575327	e
			AverageT4	1.61665			1.82885			2.26807			1.94549			1.63385
			T1R1	1.46777	0.0125941	f	2.11531	0.0170386	ab	2.47913	0.0266408	ab	2.33807	0.0254779	a	1.66531	0.0101776	cd
			T2R2	1.4727	0.0158919	f	2.10847	0.0230535	ab	2.49541	0.0342564	a	2.33093	0.0326433	a	1.65559	0.00464548	cd
			AverageT1	1.47024			2.11189			2.48727			2.3345			1.66045
			T2R1	1.46361	0.00904278	f	2.12129	0.0168634	ab	2.4153	0.0170115	cd	2.27598	0.0256924	b	1.64511	0.0124273	cde
			T2R2	1.46849	0.0111484	f	2.11264	0.017662	ab	2.388	0.0108176	def	2.20996	0.0180287	cd	1.63031	0.0241589	de
			T2R3	1.5303	0.0222781	d	2.0373	0.0232894	d	2.30664	0.0213723	hi	2.16082	0.0271871	d	1.42803	0.00712541	f
			AverageT2	1.48747			2.09041			2.36998			2.21559			1.56781
			T3R1	1.47093	0.0212606	f	2.1182	0.0196864	ab	2.39991	0.0185897	cde	2.22886	0.0124255	bc	1.65831	0.0140875	cd
			T3R2	1.49547	0.00560324	ef	2.08778	0.00568012	abc	2.36667	0.0201455	efg	2.25373	0.00281272	bc	1.62953	0.0402592	de
			T3R3	1.54196	0.0208774	d	2.04901	0.0148145	cd	2.44264	0.000503613	bc	2.34548	0.0204032	a	1.56518	0.0187682	e
			AverageT3	1.50279			2.085			2.40307			2.27602			1.61767
			T4R1	1.46301	0.00818011	f	2.12223	0.00873713	a	2.39624	0.0055263	cde	2.20868	0.0119621	cd	1.65863	0.0101891	cd
			T4R2	1.48757	0.0103137	f	2.09601	0.0116047	ab	2.39442	0.00366174	de	2.20517	0.00682079	cd	1.65967	0.0140235	cd
			T4R3	1.52104	0.00518061	de	2.07379	0.00342115	bcd	2.43309	0.00540784	cd	2.34385	0.0035985	a	1.56539	0.0148031	e
			AverageT4	1.49054			2.09734			2.40792			2.25257			1.6279
			2021
			T1R1	1.5561	0.0255107	cd	1.86548	0.0387892	e	2.3149	0.0184512	fgh	1.95636	0.0396377	fg	1.72418	0.0583668	bc
			T2R2	1.55404	0.0100849	cd	1.85569	0.0217973	ef	2.34328	0.0415428	efg	1.87645	0.0275182	h	1.84307	0.0586014	a
			AverageT1	1.55507			1.86059			2.32909			1.9164			1.78362
			T2R1	1.52869	0.018548	def	1.87398	0.0346572	de	2.32061	0.0078556	fgh	1.87858	0.035286	h	1.71825	0.0453876	bc
			T2R2	1.53854	0.0228724	cde	1.84626	0.035732	efg	2.32827	0.0226964	fgh	1.70236	0.0310257	k	1.60622	0.0224313	de
			T2R3	1.6221	0.0205472	b	1.80692	0.0206326	fgh	2.08598	0.0113509	k	1.71251	0.0483796	jk	1.3136	0.0549897	g
			AverageT2	1.56311			1.84239			2.24495			1.76449			1.54602
			T3R1	1.54105	0.0149116	cde	1.78303	0.0467459	h	2.30296	0.00532447	ghi	1.75882	0.0354573	j	1.8321	0.0539046	a
			T3R2	1.56862	0.0404796	c	1.89232	0.0553672	de	2.25438	0.0295298	i	1.91838	0.0335899	gh	1.8062	0.0863441	a
			T3R3	1.68266	0.0104521	a	1.8027	0.00855616	gh	2.41372	0.0462121	cd	1.9426	0.0237784	g	1.40521	0.0785279	f
			AverageT3	1.59744			1.82602			2.32368			1.87327			1.68117
			T4R1	1.55231	0.0437947	cd	1.77396	0.0457273	h	2.27793	0.0165763	hi	1.81953	0.047255	i	1.77774	0.0789651	ab
			T4R2	1.54788	0.0215365	cde	1.91732	0.0160385	d	2.19025	0.0552227	j	1.99805	0.0493629	ef	1.55954	0.0365609	e
			T4R3	1.62573	0.0245848	b	1.84515	0.0203765	efg	2.33693	0.0382039	fg	2.02663	0.0395517	e	1.55812	0.0667107	e
			AverageT4	1.57531			1.84548			2.26837			1.94807			1.6318
			T1R1	1.4458	0.00575219	h	2.11607	0.0130132	a	2.46802	0.0683591	ab	2.34599	0.0511519	a	1.66518	0.0120784	cd
			T2R2	1.45357	0.0270593	h	2.09909	0.0341242	ab	2.4999	0.0330125	a	2.33095	0.0340228	a	1.65354	0.00129843	cd
			AverageT1	1.44968			2.10758			2.48396			2.33847			1.65936
			T2R1	1.43977	0.008786	h	2.12032	0.0169197	a	2.41673	0.0160838	cd	2.27582	0.0229224	b	1.64313	0.0106166	cde
			T2R2	1.44896	0.012175	h	2.10737	0.0201122	a	2.3891	0.00783695	cde	2.21022	0.0177391	cd	1.62908	0.0224766	de
			T2R3	1.51223	0.0208166	ef	2.02797	0.0226498	c	2.30971	0.0197329	gh	2.16023	0.0223832	d	1.42795	0.00828799	f
			AverageT2	1.46699			2.08522			2.37185			2.21542			1.56672
			T3R1	1.4464	0.0162881	h	2.11656	0.0181757	a	2.40309	0.0134467	cd	2.22644	0.0166179	bc	1.66164	0.0200933	cd
			T3R2	1.47248	0.00131961	gh	2.08592	0.00581502	ab	2.36635	0.0206696	def	2.25466	0.00412734	bc	1.63013	0.0438174	de
			T3R3	1.5199	0.0231887	def	2.04941	0.017666	bc	2.439	0.00337086	bc	2.34437	0.0229403	a	1.56648	0.0212208	e
			AverageT3	1.4796			2.08396			2.40281			2.27516			1.61942
			T4R1	1.44018	0.0110588	h	2.12097	0.016077	a	2.39364	0.00904783	cde	2.21131	0.0158659	cd	1.65805	0.0117389	cd
			T4R2	1.46702	0.0102429	gh	2.09414	0.0121377	ab	2.39384	0.00222512	cde	2.20233	0.00921719	cd	1.66055	0.0146955	cd
			T4R3	1.49692	0.00504404	fg	2.0757	0.00264188	ab	2.43019	0.00241382	bc	2.34222	0.00339016	a	1.56652	0.0174287	e
				1.46804			2.09694			2.40589			2.25195			1.62838
			T1R1	1.00478	0.0131595	c	1.71973	0.0516096	e	2.25275	0.0595614	bcd	1.53144	0.0198148	ij	1.50563	0.120083	c
			T2R2	1.01401	0.0177411	c	1.67754	0.0700871	e	2.27888	0.0782645	abcd	1.50027	0.036032	j	1.62033	0.0639487	abc
			AverageT1	1.00939			1.69863			2.26582			1.51585			1.56298
			T2R1	0.999827	0.0213793	c	1.70293	0.0699639	e	2.14527	0.0851602	gh	1.65906	0.0316863	gh	1.29589	0.138014	def
			T2R2	1.01721	0.0240727	c	1.67624	0.0704147	e	2.11586	0.0400073	hi	1.53166	0.0987993	ij	1.20568	0.0943164	f
			T2R3	1.134	0.0142908	a	1.57843	0.088128	f	1.76758	0.0807735	j	1.38053	0.0512363	k	0.852333	0.00845322	g
			AverageT2	1.05035			1.65253			2.00957			1.52375			1.11797
			T3R1	1.01272	0.0139847	c	1.42572	0.0368427	g	2.20331	0.0349839	defg	1.6676	0.0342169	g	1.33595	0.0998453	de
			T3R2	1.01562	0.0283464	c	1.82394	0.095214	abc	2.12207	0.0599937	h	1.54315	0.0615777	ij	1.54218	0.0151658	bc
			T3R3	1.1508	0.0128987	a	1.73301	0.0327292	de	2.10678	0.0256643	hi	1.72452	0.058784	efg	0.940952	0.0602767	g
			AverageT3	1.05971			1.66089			2.14406			1.64509			1.27303
			T4R1	1.00536	0.0220366	c	1.42985	0.0805543	g	2.18339	0.0402525	efgh	1.69912	0.0347928	fg	1.19575	0.105295	f
			T4R2	1.0041	0.00898603	c	1.83515	0.00535563	abc	2.0472	0.0327327	i	1.59823	0.0448264	hi	1.34093	0.0483092	de
			T4R3	1.06501	0.00782083	b	1.80555	0.00544638	cd	2.11212	0.0203681	hi	1.57612	0.0121804	i	1.24048	0.0790513	ef
			AverageT4	1.02482			1.69018			2.11423			1.62449			1.25905
			T1R1	0.876107	0.0140699	ef	1.88968	0.0134919	abc	2.31427	0.00436857	ab	1.83569	0.0168957	bc	1.63738	0.0114665	ab
			T2R2	0.864162	0.00899093	ef	1.90083	0.0100711	ab	2.3003	0.0176845	abc	1.82878	0.017541	bcd	1.63943	0.00655022	ab
			AverageT1	0.870134			1.89526			2.30729			1.83224			1.6384
			T2R1	0.862483	0.00716524	f	1.89965	0.0193596	ab	2.26748	0.0139142	abcd	1.92069	0.0460878	a	1.57933	0.0448582	abc
			T2R2	0.874933	0.00238145	ef	1.88703	0.00961212	abc	2.23132	0.00590103	cdef	1.88364	0.0422438	ab	1.54648	0.0414629	bc
			T2R3	0.927721	0.0089318	d	1.81236	0.0207593	bc	2.17097	0.0326053	fgh	1.72463	0.029732	efg	1.39436	0.012751	d
			AverageT2	0.888379			1.86635			2.22326			1.84298			1.50672
			T3R1	0.862853	0.0148466	f	1.90231	0.0103653	a	2.28277	0.0164519	abc	1.81653	0.0220064	bcd	1.60418	0.0276703	abc
			T3R2	0.886189	0.0125387	ef	1.87499	0.0155315	abc	2.28407	0.0285507	abc	1.76539	0.0320082	cdef	1.67009	0.054391	a
			T3R3	0.941312	0.00405463	d	1.83589	0.00515386	abc	2.33975	0.0114543	a	1.79167	0.0116494	cdef	1.5236	0.0302758	bc
			AverageT3	0.896785			1.87106			2.3022			1.7912			1.59929
			T4R1	0.864604	0.0204875	ef	1.8985	0.019677	ab	2.27851	0.00698687	abcd	1.81063	0.0141566	cd	1.59483	0.022471	abc
			T4R2	0.891173	0.00882789	e	1.87096	0.00903651	abc	2.26143	0.0117891	abcd	1.80384	0.0100169	cd	1.60368	0.0097363	abc
			T4R3	0.918064	0.00706782	d	1.85991	0.00673257	abc	2.32194	0.00707697	ab	1.75636	0.0132288	def	1.5061	0.00611318	c
			AverageT4	0.89128			1.87646			2.2873			1.79027			1.5682
			2021
			T1R1	0.985075	0.0180294	de	1.71867	0.0457945	d	2.26027	0.0565351	abc	1.53643	0.0280491	jk	1.48808	0.111613	de
			T2R2	0.986026	0.0113362	de	1.6839	0.0800486	d	2.27767	0.0795151	abc	1.50754	0.0389399	k	1.61124	0.0586873	abc
			AverageT1	0.985551			1.70129			2.26897			1.52198			1.54966
			T2R1	0.970688	0.0196018	e	1.70406	0.0691137	d	2.14819	0.0800072	ef	1.65379	0.0330785	hi	1.30154	0.132504	fgh
			T2R2	0.990261	0.0191	de	1.68196	0.0615099	d	2.11371	0.042878	f	1.5284	0.0985838	k	1.21071	0.0993009	h
			T2R3	1.1077	0.01833	b	1.58465	0.0853709	e	1.75691	0.0855727	h	1.39895	0.0583969	l	0.83715	0.0194581	i
			AverageT2	1.02288			1.65689			2.00627			1.52705			1.11647
			T3R1	0.989574	0.019569	de	1.42429	0.0470066	f	2.20468	0.0415723	cde	1.66806	0.0327731	ghi	1.33337	0.0972478	fg
			T3R2	1.00656	0.023296	d	1.80623	0.0843151	c	2.12096	0.0608776	f	1.54508	0.0700259	jk	1.54559	0.0217263	abcd
			T3R3	1.13788	0.0290385	a	1.72353	0.0501359	d	2.10287	0.0276543	fg	1.73296	0.0642339	efg	0.933119	0.0567453	i
			AverageT3	1.04467			1.65135			2.14284			1.6487			1.27069
			T4R1	0.976232	0.0200893	de	1.44728	0.0621837	f	2.17831	0.041133	def	1.69081	0.0327792	fgh	1.19682	0.11429	h
			T4R2	0.983829	0.0244085	de	1.83842	0.0189502	abc	2.03406	0.0281321	g	1.60902	0.0427988	ij	1.33511	0.048532	fg
			T4R3	1.04226	0.00542348	c	1.80914	0.0182152	bc	2.11057	0.0128611	f	1.57458	0.0186945	jk	1.23635	0.0756878	gh
			AverageT4	1.00077			1.69828			2.10765			1.62481			1.25609
			T1R1	0.847385	0.0215227	h	1.89145	0.0142666	abc	2.31555	0.0108431	a	1.8398	0.00897425	bc	1.6331	0.015815	ab
			T2R2	0.837006	0.0125688	h	1.90719	0.0154374	a	2.29442	0.0131202	ab	1.83129	0.0206623	bc	1.64077	0.00655294	ab
			AverageT1	0.842195			1.89932			2.30498			1.83555			1.63694
			T2R1	0.84067	0.00361254	h	1.89935	0.00691493	a	2.27647	0.0181325	abc	1.91647	0.0461215	a	1.57363	0.0465232	abcd
			T2R2	0.851153	0.00761953	h	1.88814	0.0152905	abc	2.2274	0.00236639	bcd	1.88595	0.0339338	ab	1.54571	0.0420834	abcd
			T2R3	0.907974	0.0214571	f	1.8058	0.0333282	c	2.1736	0.0463308	def	1.72575	0.0386823	efgh	1.3927	0.0205883	ef
			AverageT2	0.866599			1.86443			2.22582			1.84272			1.50401
			T3R1	0.845864	0.0121966	h	1.89177	0.0127788	abc	2.28376	0.0221163	abc	1.82034	0.021204	bcd	1.60158	0.0266138	abcd
			T3R2	0.864851	0.0158131	gh	1.86892	0.0159219	abc	2.28611	0.0295849	ab	1.76959	0.0279767	cde	1.66504	0.0544164	a
			T3R3	0.918341	0.0128043	f	1.83885	0.0189561	abc	2.33041	0.0179218	a	1.79678	0.00337983	cde	1.52535	0.0325904	bcd
			AverageT3	0.876352			1.86651			2.3001			1.79557			1.59732
			T4R1	0.843623	0.0163529	h	1.89515	0.0219253	ab	2.27514	0.0105884	abc	1.81332	0.0119671	bcd	1.59322	0.020565	abcd
			T4R2	0.868788	0.0147912	gh	1.87256	0.0169161	abc	2.25378	0.0190613	abc	1.80921	0.0141282	cd	1.6028	0.0200471	abcd
			T4R3	0.892746	0.00261879	fg	1.861	0.00720784	abc	2.32383	0.00589238	a	1.75127	0.0181533	def	1.50761	0.0134457	cd
				0.868386			1.87624			2.28425			1.79127			1.56787
[truncated: 50 more columns]

## Sheet: Figure3
Index		2020	Pn																	gs															Ci
	Number		7			13			19			25			31					7			13			19			25			31			7			13			19			25			31
22TR6R11	37		12.9	1.26	20.4762	12.6	1.02	24.7059	9.45	1.01	18.7129	6.65	1.01	13.1683	3.83	1.05	7.29524			0.218			0.278			0.218			0.374			0.196			247			292			260			295			319
			8.49	1.12	15.1607	9.49	1.13	16.7965	9.73	1.18	16.4915	5.94	1.17	10.1538	4.22	1.18	7.15254			0.178			0.291			0.378			0.361			0.201			275			299			305			370			308
			13.2	1.28	20.625	12.6	1.04	24.2308	7.63	0.92	16.587	7.18	0.91	15.7802	3.59	1.01	7.10891			0.196			0.283			0.325			0.351			0.207			246			295			336			322			317
																				0.218									0.374									292						295
					18.5953			21.9125			17.2608			13.0351			7.30839			0.206087			0.284753			0.307087			0.350087			0.19442			256.327			296.327			300.327			328.66			317.66
					18.754			21.911			17.2638			13.0341			7.29524			0.197333			0.284			0.307			0.362			0.196			256			295.333			300.333			329			319
Average
22TR6R12	40		10.2	1.01	20.198	13.4	1.12	23.9286	11.3	1.25	18.08	6.83	1.24	11.0161						0.227			0.267			0.25			0.334						266			277			291			339
			9.13	0.95	19.2211	9.56	1.02	18.7451	9.56	0.95	20.1263	7.72	0.94	16.4255						0.234			0.265			0.336			0.392						275			300			288			296
			9.04	1.05	17.219	12.6	1.08	23.3333	9.23	1.25	14.768	8.44	1.24	13.6129						0.198			0.339			0.297			0.367						234			281			318			353
																				0.227						0.25												277			291
					18.8752			22.0678			17.651			13.6847			7.09602			0.210753			0.290087			0.30342			0.364087			0.19842			258.327			285.66			300.993			329.327			311.66
					18.8794			22.0023			17.6581			13.6849			7.15254			0.219667			0.290333			0.294333			0.364333			0.201			258.333			286			299			329.333			308
Average
22TR6R13	43		9.29	1.16	16.0172	14.5	1.22	23.7705	9.99	1.08	18.5	8.12	1.07	15.1776						0.143			0.306			0.344			0.363						265			299			291			326
			10.3	1.02	20.1961	9.58	1.02	18.7843	9.12	1.12	16.2857	7.65	1.31	11.6794						0.236			0.305			0.305			0.361						265			297			295			320
			9.68	0.95	20.3789	14.2	1.21	23.4711	9.61	1.15	16.713	6.56	1.14	11.5088						0.196			0.263			0.281			0.337						241			293			346			358
																				0.143									0.363						265						291
					18.8614			22.115			17.1045			12.7678			7.10133			0.201753			0.291087			0.31142			0.34242			0.20842			258.993			296.327			309.327			334.327			315.66
					18.8641			22.0086			17.1663			12.7886			7.10891			0.191667			0.291333			0.31			0.353667			0.207			257			296.333			310.667			334.667			317
Average					18.8325			21.974			17.3627			13.1692			7.18556			0.202889			0.288556			0.303778			0.36			0.201333			257.111			292.556			303.333			331			314.667
22TR6R21	38		7.52	1.08	13.9259	10.1	0.93	21.7204	11.3	1.19	18.9916	5.44	1.18	9.22034	2.22	1.05	4.22857			0.181			0.324			0.325			0.324			0.149			268			314			324			354			331
			11.8	1.03	22.9126	10.2	0.92	22.1739	8.67	1.41	12.2979	6.18	1.4	8.82857	2.52	1.28	3.9375			0.174			0.293			0.245			0.251			0.142			251			301			307			302			325
			8.92	1.18	15.1186	9.86	1.11	17.7658	9.61	1.17	16.4274	6.36	1.16	10.9655	2.89	1.47	3.93197			0.237			0.246			0.325			0.331			0.152			277			297			293			328			329
																							0.324						0.324						268									354
					17.2353			20.5525			15.9008			9.67508			4.14839			0.197487			0.276153			0.298487			0.311487			0.14582			264.327			304.327			308.327			329.66			333.66
					17.3191			20.5534			15.9056			9.67148			4.22857			0.197333			0.287667			0.298333			0.302			0.149			265.333			304			308			328			331
Average
22TR6R22	41		10.7	1.21	17.686	13.5	1.12	24.1071	9.02	0.95	18.9895	5.19	0.94	11.0426						0.235			0.313			0.294			0.339						252			322			333			332
			8.02	1.02	15.7255	14.2	1.42	20	8.39	1.08	15.537	6.57	1.07	12.2804						0.141			0.295			0.273			0.229						276			264			296			331
			9.09	0.95	19.1368	12.5	1.35	18.5185	9.99	1.42	14.0704	5.39	1.41	7.64539						0.202			0.236			0.352			0.408						271			298			293			328
																				0.235						0.294												322			333
					17.5152			20.7078			16.291			10.3247			3.93602			0.202153			0.281487			0.29482			0.325487			0.14982			266.327			293.66			308.993			330.327			327.66
					17.5161			20.8752			16.199			10.3228			3.9375			0.192667			0.281333			0.306333			0.325333			0.142			266.333			294.667			307.333			330.333			325
Average
22TR6R23	44		9.77	0.99	19.7374	12.4	1.32	18.7879	13.7	1.25	21.92	4.97	1.24	8.01613						0.223			0.274			0.321			0.347						283			356			344			331
			8.59	1.11	15.4775	12.7	1.41	18.0142	10.8	1.31	16.4885	9.16	1.3	14.0923						0.169			0.253			0.293			0.298						264			263			321			356
			7.35	0.85	17.2941	13.5	1.06	25.4717	6.23	1.41	8.83688	4.43	1.4	6.32857						0.187			0.292			0.294			0.301						249			293			286			321
																							0.274						0.347						283									331
					17.5014			20.755			15.7445			9.40782			3.94133			0.193153			0.282487			0.30282			0.30382			0.15982			266.993			304.327			317.327			335.327			331.66
					17.503			20.7579			15.7485			9.479			3.93197			0.193			0.273			0.302667			0.315333			0.152			265.333			304			317			336			329
Average					17.446			20.7288			15.951			9.82442			4.03268			0.194333			0.280667			0.302444			0.314222			0.147667			265.667			300.889			310.778			331.444			328.333
22TR6R31	39		7.99	1.12	14.2679	10.1	1.19	16.9748	7.35	0.99	14.8485	2.36	0.98	4.81633	1.38	1.01	2.73267			0.236			0.271			0.301			0.326			0.0867			275			320			307			354			338
			8.48	0.99	17.1313	8.33	0.91	18.3077	7.73	1.08	14.3148	3.73	1.07	6.97196	1.67	1.32	2.5303			0.176			0.286			0.221			0.277			0.0921			289			303			326			322			325
			7.96	0.91	17.4945	10.5	1.03	20.3883	7.41	1.18	12.5593	5.61	1.17	9.58974	1.69	1.29	2.62016			0.156			0.213			0.286			0.242			0.0992			237			301			296			321			331
																				0.236						0.301												320			307
					16.2353			18.5525			13.9008			7.04508			2.74839			0.177887			0.256553			0.278887			0.281887			0.08622			267.327			307.327			311.327			332.66			335.66
					16.2979			18.5569			13.9075			7.12601			2.73267			0.189333			0.256667			0.269333			0.281667			0.0867			267			308			309.667			332.333			338
Average
22TR6R32	42		9.95	0.98	20.3061	11.7	1.09	21.4679	8.71	1.15	15.1478	3.94	1.14	6.91228						0.199			0.296			0.272			0.251						273			291			317			358
			8.56	1.02	16.7843	10.3	1.35	15.2593	7.32	1.08	13.5556	5.52	1.07	10.3178						0.179			0.235			0.289			0.283						249			302			293			328
			7.53	1.21	12.4463	13.4	1.41	19.0071	8.15	1.15	14.1739	3.34	1.14	5.85965						0.169			0.289			0.264			0.325						288			292			325			313
																							0.296						0.251						273			291
					16.5152			18.7078			14.291			7.69474			2.53602			0.182553			0.261887			0.27522			0.295887			0.09022			269.327			296.66			311.993			333.327			329.66
					16.5122			18.5781			14.2924			7.69656			2.5303			0.182333			0.273333			0.275			0.286333			0.0921			270			295			311.667			333			325
Average
22TR6R33	45		9.19	1.15	15.9826	12.4	0.99	25.0505	7.78	1.21	12.8595	3.55	1.2	5.91667						0.167			0.237			0.309			0.274						273			314			325			307
			8.26	0.98	16.8571	8.29	1.01	16.4158	7.62	1.15	13.2522	3.32	1.14	5.82456						0.176			0.283			0.282			0.279						268			313			312			347
			8.42	1.01	16.6733	7.47	1.01	14.7921	6.32	0.81	15.6049	4.2	0.98	8.57143						0.149			0.268			0.293			0.269						264			294			323			363
																				0.167						0.309									273									307
					16.5014			18.755			13.7445			6.77782			2.54133			0.173553			0.262887			0.28322			0.27422			0.10022			269.993			307.327			320.327			338.327			333.66
					16.5043			18.7528			13.9055			6.77089			2.62016			0.164			0.262667			0.294667			0.274			0.0992			268.333			307			320			339			331
Average					16.4382			18.6293			14.0352			7.19782			2.62771			0.178556			0.264222			0.279667			0.280667			0.0926667			268.444			303.333			313.778			334.778			331.333
22TR6LR11	46		10.5	1.18	17.7966	13.3	1.09	24.4037	10.6	0.96	22.0833	7.44	0.95	15.6632	3.16	0.93	6.7957			0.183			0.257			0.331			0.411			0.238			231			312			338			347			316
			10.2	1.08	18.8889	13.7	1.11	24.6847	8.79	1.15	15.287	6.95	1.14	12.193	3.22	1.01	6.37624			0.231			0.302			0.301			0.362			0.231			256			276			289			326			312
			9.39	1.12	16.7679	7.85	1.08	14.537	6.83	1.11	12.3063	5.01	1.1	9.10909	2.89	0.89	6.49438			0.204			0.267			0.289			0.312			0.247			290			312			282			317			326
																							0.257						0.411									312						347
					17.8853			21.2025			16.5508			12.3251			6.79839			0.206047			0.284713			0.307047			0.350047			0.23238			259.327			299.327			303.327			331.66			320.66
					17.8178			21.2085			16.5589			12.3217			6.7957			0.206			0.275333			0.307			0.361667			0.238			259			300			303			330			316
Average
22TR6LR12	49		9.83	0.98	20.0612	11.3	0.83	27.2289	10.6	1.29	16.4341	7.21	1.28	11.2656						0.241			0.311			0.298			0.355						230			282			323			371
			8.83	0.79	22.3544	8.27	1.11	14.9009	6.91	0.95	14.5474	5.09	0.94	10.8298						0.161			0.311			0.298			0.375						268			300			295			323
			5.01	0.83	12.0723	10.4	0.93	22.3656	12.4	1.25	19.84	10.6	1.24	17.0968						0.231			0.283			0.286			0.362						285			279			293			305
																							0.311			0.298												282						371
					18.1652			21.3578			16.941			12.9747			6.38602			0.210713			0.290047			0.30338			0.364047			0.23638			261.327			288.66			303.993			332.327			314.66
					18.1626			21.4985			16.9405			13.0641			6.37624			0.211			0.301667			0.294			0.364			0.231			261			287			303.667			333			312
Average
22TR6LR13	52		10.1	1.01	20	12.8	1.08	23.7037	9.33	1.12	16.6607	6.05	1.11	10.9009						0.218			0.344			0.312			0.351						251			287			270			358
			8.48	0.98	17.3061	11.5	1.11	20.7207	11.3	1.21	18.6777	6.51	1.2	10.85						0.201			0.289			0.326			0.283						254			314			369			332
			8.66	1.01	17.1485	10.5	1.06	19.8113	10.7	1.21	17.686	8.56	1.2	14.2667						0.186			0.275			0.296			0.365						281			299			293			321
																							0.344						0.351									287			270
					18.1514			21.405			16.3945			12.0578			6.19133			0.201713			0.291047			0.31138			0.34238			0.24638			261.993			299.327			312.327			337.327			318.66
					18.1515			21.4119			17.6748			12.0059			6.49438			0.201667			0.302667			0.311333			0.333			0.247			262			300			310.667			337			326
Average					18.044			21.3729			17.058			12.4639			6.55544			0.206222			0.293222			0.304111			0.352889			0.238667			260.667			295.667			305.778			333.333			318
22TR6LR21	47		10.9	1.21	18.0165	11.3	1.13	20	12.2	1.08	22.5926	5.81	1.07	10.8598	2.57	0.89	5.77528			0.203			0.311			0.333			0.361			0.187			214			323			317			359			328
			8.31	1.15	14.4522	10.1	0.93	21.7204	5.45	0.85	12.8235	3.65	0.84	8.69048	2.98	1.11	5.36937			0.211			0.253			0.312			0.286			0.193			288			269			324			359			319
			12.3	1.11	22.1622	12.4	1.11	22.3423	7.45	0.98	15.2041	5.65	0.97	11.6495	2.92	1.13	5.16814			0.192			0.305			0.326			0.312			0.199			253			287			250			285			322
																				0.203						0.333									214									359
					18.2053			21.5225			16.8708			10.4051			5.77839			0.211247			0.289913			0.312247			0.319947			0.19018			253.327			293.327			297.327			333.66			326.66
					18.2103			21.3543			16.8734			10.3999			5.77528			0.202			0.289667			0.323667			0.319667			0.187			251.667			293			297			334.333			328
Average
22TR6LR22	50		7.86	0.91	17.2747	11.5	0.98	23.4694	10.4	1.18	17.6271	7.51	1.17	12.8376						0.206			0.279			0.331			0.386						219			305			342			377
			6.49	0.59	22	10.2	1.03	19.8058	9.21	1.16	15.8793	5.71	1.15	9.93043						0.252			0.289			0.326			0.356						259			288			299			334
			6.75	0.82	16.4634	12.2	1.12	21.7857	8.14	0.89	18.2921	4.57	0.88	10.3864						0.189			0.289			0.269			0.294						287			257			252			287
																							0.279						0.386									305						377
					18.4852			21.6778			17.261			11.0547			5.36602			0.215913			0.295247			0.30858			0.333947			0.19418			255.327			282.66			297.993			334.327			320.66
					18.5794			21.687			17.2662			11.0515			5.36937			0.215667			0.285667			0.308667			0.345333			0.193			255			283.333			297.667			332.667			319
Average
22TR6LR23	53		9.79	1.03	19.0097	13.2	0.92	28.6957	8.62	1.15	14.9913	6.36	1.14	11.1579						0.184			0.32			0.339			0.288						258			311			330			363
			9.25	0.98	18.8776	8.45	1.12	15.0893	8.39	1.02	16.451	5.48	1.01	10.8515						0.207			0.338			0.314			0.296						239			271			320			355
			8.93	1.02	17.5098	10.5	0.98	21.4286	9.89	1.08	18.3148	4.78	1.07	8.93458						0.229			0.265			0.296			0.324						270			300			264			299
																							0.32						0.288									311			330
					18.4714			21.725			16.7145			10.1378			5.17133			0.206913			0.296247			0.31658			0.31228			0.20418			255.993			293.327			306.327			339.327			324.66
					18.4657			21.7378			16.5857			10.3147			5.16814			0.206667			0.307667			0.316333			0.302667			0.199			255.667			294			304.667			339			322
Average					18.4185			21.593			16.9084			10.5887			5.4376			0.208111			0.294333			0.316222			0.322556			0.193			254.111			290.111			299.778			335.333			323
22TR6LR31	48		8.68	0.92	18.8696	12.4	1.21	20.4959	11.6	1.32	17.5758	4.95	1.31	7.55725	1.56	0.82	3.80488			0.237			0.266			0.342			0.369			0.142			268			301			314			349			324
			10.1	1.39	14.5324	9.09	0.85	21.3882	10.6	1.31	16.1832	4.88	1.3	7.50769	1.84	1.08	3.40741			0.204			0.289			0.312			0.321			0.141			259			279			299			321			321
			11.6	0.95	24.4211	12.3	0.95	25.8947	14.6	1.45	20.1379	8.3	1.44	11.5278	2.21	1.25	3.536			0.201			0.295			0.291			0.241			0.152			223			286			269			336			326
																							0.266						0.369									301						349
					19.2753			22.5925			17.9408			8.86508			3.81839			0.214247			0.292913			0.315247			0.298847			0.13918			250.327			290.327			294.327			334.66			327.66
					19.2743			22.5929			17.9656			8.86424			3.80488			0.214			0.283333			0.315			0.310333			0.142			250			288.667			294			335.333			324
Average
22TR6LR32	51		8.31435	0.52	31.9783	19.3516	1.15	33.6549	12.4561	0.81	30.7559	5.26317	0.8	13.1579						0.174			0.304			0.386			0.331						253			280			312			363
			7.21	1.11	12.991	12.6	1.28	19.6875	5.61	1.11	10.1081	3.81	1.1	6.92727						0.253			0.286			0.298			0.286						241			265			291			326
			7.67	1.12	13.6964	8.27	1.11	14.9009	4.38	0.62	14.129	2.58	0.61	8.45902						0.201			0.304			0.286			0.321						258			296			281			316
																				0.174						0.386									253			280
					19.5552			22.7478			18.331			9.51474			3.40602			0.218913			0.298247			0.31158			0.312847			0.14318			252.327			279.66			294.993			335.327			321.66
					19.5552			22.7478			18.331			9.51474			3.40741			0.209333			0.298			0.323333			0.312667			0.141			250.667			280.333			294.667			335			321
Average
22TR6LR33	54		8.71	0.93	18.7312	12.2	0.91	26.8132	9.46	0.98	19.3061	5.08	0.97	10.4742						0.232			0.351			0.351			0.299						283			284			336			357
			8.01	0.87	18.4138	9.69	0.96	20.1875	9.36	0.92	20.3478	4.06	0.91	8.92308						0.236			0.269			0.312			0.289						251			295			296			323
			9.42	0.89	21.1685	10.6	1.02	20.7843	7.26	1.08	13.4444	3.29	1.07	6.14953						0.161			0.312			0.296			0.257						224			291			280			336
																							0.351						0.299												336			357
					19.5414			22.795			17.7845			8.59782			3.21133			0.209913			0.299247			0.31958			0.29118			0.15318			252.993			290.327			303.327			340.327			325.66
					19.4378			22.595			17.6995			8.51561			3.536			0.209667			0.310667			0.319667			0.281667			0.152			252.667			290			304			338.667			326
Average					19.4225			22.6452			17.9987			8.96486			3.58276			0.211			0.297333			0.319333			0.301556			0.145			251.111			286.333			297.556			336.333			323.667
22TR6SR11	55		10.8	0.98	22.0408	11.7	1.11	21.0811	10.3	1.15	17.913	7.13	1.14	12.5088	2.77	0.83	6.6747			0.178			0.228			0.329			0.379			0.231			226			291			323			383			322
			7.81	1.12	13.9464	14.6	1.15	25.3913	10.1	1.26	16.0317	7.56	1.25	12.096	3.38	1.08	6.25926			0.169			0.308			0.312			0.326			0.233			276			293			296			290			312
			8.56	0.98	17.4694	9.82	1.12	17.5357	9.84	1.28	15.375	7.63	1.27	12.0157	3.96	1.28	6.1875			0.256			0.275			0.265			0.365			0.242			279			314			287			322			314
																							0.228						0.379						226						323
					17.7653			21.0825			16.4308			12.2051			6.67839			0.201146			0.279812			0.302146			0.345146			0.227479			259.547			299.547			303.547			331.88			320.88
					17.8189			21.336			16.4399			12.2068			6.6747			0.201			0.270333			0.302			0.356667			0.231			260.333			299.333			302			331.667			322
Average
22TR6SR12	58		11.9	1.08	22.037	10.1	1.08	18.7037	9.31	0.98	19	8.22	0.97	16.9485						0.181			0.291			0.293			0.377						274			286			336			348
			8.88	1.21	14.6777	13.7	1.18	23.2203	8.91	1.12	15.9107	5.61	1.11	10.1081						0.215			0.286			0.262			0.375						221			289			296			331
			9.32	1.05	17.7524	12.4	1.14	21.7544	9.19	1.22	15.0656	6.54	1.21	10.8099						0.221			0.313			0.312			0.325						289			287			283			318
																							0.291			0.293												286			336
					18.0452			21.2378			16.821			12.8547			6.26602			0.205812			0.285146			0.298479			0.359146			0.231479			261.547			288.88			304.213			332.547			314.88
					18.1557			21.2261			16.6588			12.6222			6.25926			0.205667			0.296667			0.289			0.359			0.233			261.333			287.333			305			332.333			312
Average
22TR6SR13	61		7.62	0.91	16.7473	8.64	0.89	19.4157	11.9	1.35	17.6296	7.15	1.34	10.6716						0.177			0.236			0.298			0.361						236			330			331			357
			9.76	1.05	18.5905	12.4	1.09	22.7523	8.64	1.04	16.6154	6.84	1.03	13.2816						0.201			0.303			0.326			0.323						279			283			336			321
			10.5	1.12	18.75	14.2	1.31	21.6794	9.25	1.27	14.5669	7.47	1.26	11.8571						0.184			0.319			0.295			0.363						267			285			273			334
																				0.177									0.361						236						331
					18.0314			21.285			16.2745			11.9378			6.07133			0.196812			0.286146			0.306479			0.337479			0.241479			262.213			299.547			312.547			337.547			318.88
					18.0292			21.2825			16.2706			11.9368			6.1875			0.187333			0.286			0.306333			0.349			0.242			260.667			299.333			313.333			337.333			314
Average					18.0013			21.2815			16.4564			12.2553			6.37382			0.198			0.284333			0.299111			0.354889			0.235333			260.778			295.333			306.778			333.778			316
22TR6SR21	56		12.6	1.29	19.5349	14.2	1.11	25.5856	10.5	1.05	20	3.74	1.04	7.19231	2.02	0.71	5.69014			0.179			0.261			0.356			0.311			0.189			217			289			310			335			322
			9.69	1.31	14.7939	10.2	1.08	18.8889	8.82	1.02	17.2941	7.02	1.01	13.901	2.88	1.09	5.2844			0.189			0.287			0.295			0.315			0.186			257			294			296			336			315
			12.8	1.31	19.542	10.4	1.08	19.2593	7.02	1.15	12.2087	5.22	1.14	9.15789	2.32	0.85	5.45882			0.257			0.314			0.312			0.287			0.196			289			297			286			326			316
																										0.356			0.311						217									335
					17.8853			21.2025			16.5508			10.0851			5.70839			0.208346			0.287012			0.309346			0.313946			0.184279			253.547			293.547			297.547			333.88			325.88
					17.9569			21.2446			16.5009			10.0837			5.69014			0.208333			0.287333			0.321			0.304333			0.189			254.333			293.333			297.333			332.333			322
Average
22TR6SR22	59		12.2	1.22	20	13.5	1.29	20.9302	9.25	1.11	16.6667	4.53	1.1	8.23636						0.226			0.267			0.291			0.301						199			253			304			358
			10.6	1.15	18.4348	9.16	1.05	17.4476	9.52	1.15	16.5565	6.55	1.14	11.4912						0.193			0.288			0.286			0.321						271			297			287			322
			9.73	1.22	15.9508	13.1	1.02	25.6863	8.52	0.98	17.3878	5.77	0.97	11.8969						0.256			0.322			0.312			0.361						296			301			299			323
																				0.226						0.291												253			304
					18.1652			21.3578			16.941			10.7347			5.29602			0.213012			0.292346			0.305679			0.327946			0.188279			255.547			282.88			298.213			334.547			319.88
					18.1285			21.3547			16.8703			10.5415			5.2844			0.225			0.292333			0.296333			0.327667			0.186			255.333			283.667			296.667			334.333			315
Average
22TR6SR23	62		12.4	1.21	20.4959	14.6	1.25	23.36	11.1	1.42	15.6338	4.37	1.41	6.19858						0.211			0.249			0.319			0.354						232			270			325			359
			8.36	1.13	14.7965	12.1	1.18	20.5085	9.15	1.18	15.5085	4.85	1.17	8.2906						0.207			0.305			0.354			0.312						270			298			298			326
			9.95	1.03	19.3204	12.4	1.23	20.1626	10.3	1.12	18.3929	8.3	1.11	14.955						0.195			0.298			0.268			0.289						266			308			296			336
																							0.249						0.354									270						359
					18.1514			21.405			16.3945			9.81782			5.10133			0.204012			0.293346			0.313679			0.306279			0.198279			256.213			293.547			306.547			339.547			323.88
					18.2042			21.3437			16.5117			9.81471			5.45882			0.204333			0.284			0.313667			0.318333			0.196			256			292			306.333			340.333			316
Average					18.0966			21.3143			16.6277			10.1466			5.47779			0.212556			0.287889			0.310333			0.316778			0.190333			255.222			289.667			300.111			335.667			317.667
22TR6SR31	57		8.35	0.88	18.9773	13.6	0.85	32	9.58	0.89	21.5281	6.11	0.88	13.8864	3.21	1.71	3.75439			0.221			0.303			0.255			0.259			0.136			222			281			306			342			326
			9.31	1.02	18.2549	8.22	1.01	16.2772	9.45	1.32	14.3182	4.55	1.31	6.94656	1.89	1.13	3.34513			0.231			0.269			0.289			0.326			0.135			269			285			284			336			321
			9.41	0.92	20.4565	9.35	0.98	19.0816	10.4	1.18	17.6271	4.99	1.17	8.52991	2.06	1.18	3.49153			0.214			0.295			0.362			0.291			0.146			256			305			296			326			328
																				0.221						0.255									222						306
					19.0853			22.4025			17.7508			9.78508			3.75839			0.210346			0.289012			0.311346			0.291946			0.133279			250.547			290.547			294.547			334.88			328.88
					19.2296			22.453			17.8245			9.78761			3.75439			0.222			0.289			0.302			0.292			0.136			249			290.333			295.333			334.667			326
Average
22TR6SR32	60		10.1	1.11	18.1982	14.7	1.06	27.7358	10.7	1.11	19.2793	6.77	1.1	12.3091						0.16			0.305			0.306			0.323						229			275			297			347
			9.63	0.82	23.4878	12.4	1.08	22.963	9.91	0.95	20.8632	4.15	0.94	8.82979						0.221			0.311			0.321			0.298						272			289			288			323
			8.28	1.01	16.396	10.6	1.25	16.96	7.36	1.03	14.2913	5.18	1.02	10.1569						0.236			0.267			0.331			0.296						256			275			296			339
																				0.16						0.306															297			347
					19.3652			22.5578			18.141			10.4347			3.34602			0.215012			0.294346			0.307679			0.305946			0.137279			252.547			279.88			295.213			335.547			322.88
					19.3607			22.5529			18.1446			10.4319			3.34513			0.205667			0.294333			0.319333			0.305667			0.135			252.333			279.667			293.667			336.333			321
Average
22TR6SR33	63		11.2	1.03	21.7476	14.7	1.09	26.9725	10.6	0.98	21.6327	6.11	0.97	12.5979						0.191			0.338			0.363			0.281						186			306			322			357
			10.8	1.12	19.2857	11.4	1.13	20.177	7.71	1.02	15.1176	4.26	1.01	8.43564						0.236			0.294			0.297			0.314						278			281			295			332
			8.18	0.95	17.2211	10.1	0.98	20.6122	8.18	1.02	16.0392	3.99	1.01	7.90099						0.191			0.289			0.287			0.229						295			287			293			328
																							0.338						0.281									306						357
					19.3514			22.605			17.5945			9.51782			3.15133			0.206012			0.295346			0.315679			0.284279			0.147279			253.213			290.547			303.547			340.547			326.88
					19.4181			22.5872			17.5965			9.64486			3.49153			0.206			0.307			0.315667			0.274667			0.146			253			291.333			303.333			339			328
Average					19.3361			22.531			17.8552			9.9548			3.53035			0.211222			0.296778			0.312333			0.290778			0.139			251.444			287.111			297.444			336.667			325
22TR4R11	64		9.23	1.31	14.0916	10.8	1.09	19.8165	11.6	1.18	19.661	8.87	1.17	15.1624	4.56	1.22	7.47541			0.263			0.312			0.332			0.388			0.236			211			263			297			322			309
			12.3	1.11	22.1622	13.6	1.12	24.2857	11.9	1.35	17.6296	8.69	1.34	12.9701	4.05	1.05	7.71429			0.219			0.287			0.379			0.338			0.245			300			294			298			313			312
			12.2	1.08	22.5926	13.9	1.18	23.5593	9.3	1.13	16.4602	7.38	1.12	13.1786	5.44	1.35	8.05926			0.155			0.295			0.272			0.328			0.252			237			301			292			327			310
					19.6155			22.5539			17.9169			13.7704			7.47541			0.212333			0.298			0.327667			0.351333			0.236			249.333			286			295.667			320.667			309
					19.6155			22.5539			17.9169			13.7704			7.47541			0.212333			0.298			0.327667			0.351333			0.236			249.333			286			295.667			320.667			309
Average
22TR4R12	66		13.3	1.21	21.9835	10.1	1.08	18.7037	9.23	0.98	18.8367	7.43	0.97	15.3196						0.179			0.322			0.275			0.331						236			257			277			312
			8.26	1.09	15.156	13.3	1.02	26.0784	8.26	1.05	15.7333	6.46	1.04	12.4231						0.211			0.276			0.326			0.382						244			285			299			334
			11.3	1.11	20.3604	11.3	0.98	23.0612	9.62	1.05	18.3238	7.82	1.04	15.0385						0.236			0.286			0.274			0.33						262			298			324			329
					19.1666			22.6145			17.6313			14.2604			7.71429			0.208667			0.294667			0.291667			0.347667			0.245			247.333			280			300			325			312
					19.1666			22.6145			17.6313			14.2604			7.71429			0.208667			0.294667			0.291667			0.347667			0.245			247.333			280			300			325			312
Average
22TR4R13	68		10.8	1.02	21.1765	10.2	1.12	18.2143	8.12	0.85	19.1059	6.32	0.94	13.4468						0.198			0.278			0.184			0.24						265			289			297			332
			10.2	1.03	19.8058	13.2	1.05	25.1429	7.1	1.22	11.6393	5.3	1.21	8.76033						0.249			0.309			0.376			0.432						249			290			288			323
			8.36	0.98	17.0612	12.91	1.03	25.068	14.8	1.25	23.68	11.5	1.24	18.5484						0.168			0.282			0.377			0.433						259			301			296			331
					19.3478			22.8084			18.1417			13.5852			8.05926			0.205			0.289667			0.312333			0.368333			0.252			257.667			293.333			293.667			328.667			310
					19.3478			22.8084			18.1417			13.5852			8.05926			0.205			0.289667			0.312333			0.368333			0.252			257.667			293.333			293.667			328.667			310
Average					19.3766			22.6589			17.8967			13.872			7.74965			0.208667			0.294111			0.310556			0.355778			0.244333			251.444			286.444			296.444			324.778			310.333
22TR4R21	65		8.67	1.12	15.4821	11.1	1.02	21.7647	10.7	1.19	17.9832	8.92	1.24	14.3871	5.52	1.37	8.05839			0.205			0.279			0.319			0.356			0.235			278			281			305			320			315
			10.9	1.11	19.6396	10.3	0.99	20.8081	11.7	1.23	19.0244	9.27	1.22	15.1967	4.32	1.13	7.64602			0.197			0.284			0.295			0.341			0.239			242			329			291			326			309
			13.5	1.21	22.314	13.4	1.08	24.8148	9.28	1.13	16.4248	7.82	1.4	11.1714	4.21	1.13	7.45133			0.224			0.299			0.315			0.361			0.249			241			271			297			332			313
					19.1453			22.4625			17.8108			13.5851			8.05839			0.208667			0.287333			0.309667			0.352667			0.235			253.667			293.667			297.667			326			315
					19.1453			22.4625			17.8108			13.5851			8.05839			0.208667			0.287333			0.309667			0.352667			0.235			253.667			293.667			297.667			326			315
Average
22TR4R22	67		10.6	1.05	20.1905	10.3	0.97	21.2371	10.5	1.05	20	10.7	1.04	20.5769						0.246			0.301			0.311			0.367						243			284			301			336
			8.99	0.95	18.9263	10.7	0.99	21.6162	11.3	1.15	19.6522	7.28	1.14	12.7719						0.251			0.252			0.305			0.361						269			286			285			320
			10.25	1.07	19.1589	13.5	1.08	25	9.12	1.22	14.9508	5.66	1.21	9.35537						0.143			0.325			0.302			0.372						255			279			309			324
					19.4252			22.6178			18.201			14.2347			7.64602			0.213333			0.292667			0.306			0.366667			0.239			255.667			283			298.333			326.667			309
					19.4252			22.6178			18.201			14.2347			7.64602			0.213333			0.292667			0.306			0.366667			0.239			255.667			283			298.333			326.667			309
Average
22TR4R23	69		9.78	1.03	18.9903	11.4	0.99	23.0303	11.3	1.21	18.6777	9.5	1.2	15.8333						0.178			0.285			0.328			0.349						274			289			304			339
			9.88	1.05	18.819	10.9	0.93	23.4409	8.96	0.98	18.2857	6.72	0.97	13.8557						0.192			0.305			0.321			0.367						224			289			308			333
			11.54	1.13	20.4248	11.3	1.05	21.5238	9.76	1.22	16	6.21	1.21	10.2645						0.243			0.291			0.293			0.319						271			303			308			323
					19.4114			22.665			17.6545			13.3178			7.45133			0.204333			0.293667			0.314			0.345			0.249			256.333			293.667			306.667			331.667			313
					19.4114			22.665			17.6545			13.3178			7.45133			0.204333			0.293667			0.314			0.345			0.249			256.333			293.667			306.667			331.667			313
Average					19.3273			22.5818			17.8888			13.7125			7.71858			0.208778			0.291222			0.309889			0.354778			0.241			255.222			290.111			300.889			328.111			312.333
	T1R1				19.6155			22.5539			17.9169			13.7704			7.47541			0.212333			0.298			0.327667			0.351333			0.236			249.333			286			295.667			320.667			309
	T1R1				19.1666			22.6145			17.6313			14.2604			7.71429			0.208667			0.294667			0.291667			0.347667			0.245			247.333			280			300			325			312
	T1R1				19.3478			22.8084			18.1417			13.5852			8.05926			0.205			0.289667			0.312333			0.368333			0.252			257.667			293.333			293.667			328.667			310
	T1R2				19.1453			22.4625			17.8108			13.5851			8.05839			0.208667			0.287333			0.309667			0.352667			0.235			253.667			293.667			297.667			326			315
	T1R2				19.4252			22.6178			18.201			14.2347			7.64602			0.213333			0.292667			0.306			0.366667			0.239			255.667			283			298.333			326.667			309
	T1R2				19.4114			22.665			17.6545			13.3178			7.45133			0.204333			0.293667			0.314			0.345			0.249			256.333			293.667			306.667			331.667			313
	T2R1				18.754			21.911			17.2638			13.0341			7.29524			0.197333			0.284			0.307			0.362			0.196			256			295.333			300.333			329			319
	T2R1				18.8794			22.0023			17.6581			13.6849			7.15254			0.219667			0.290333			0.294333			0.364333			0.201			258.333			286			299			329.333			308
	T2R1				18.8641			22.0086			17.1663			12.7886			7.10891			0.191667			0.291333			0.31			0.353667			0.207			257			296.333			310.667			334.667			317
	T2R2				17.3191			20.5534			15.9056			9.67148			4.22857			0.197333			0.287667			0.298333			0.302			0.149			265.333			304			308			328			331
	T2R2				17.5161			20.8752			16.199			10.3228			3.9375			0.192667			0.281333			0.306333			0.325333			0.142			266.333			294.667			307.333			330.333			325
	T2R2				17.503			20.7579			15.7485			9.479			3.93197			0.193			0.273			0.302667			0.315333			0.152			265.333			304			317			336			329
	T2R3				16.2979			18.5569			13.9075			7.12601			2.73267			0.189333			0.256667			0.269333			0.281667			0.0867			267			308			309.667			332.333			338
	T2R3				16.5122			18.5781			14.2924			7.69656			2.5303			0.182333			0.273333			0.275			0.286333			0.0921			270			295			311.667			333			325
	T2R3				16.5043			18.7528			13.9055			6.77089			2.62016			0.164			0.262667			0.294667			0.274			0.0992			268.333			307			320			339			331
	T3R1				17.8178			21.2085			16.5589			12.3217			6.7957			0.206			0.275333			0.307			0.361667			0.238			259			300			303			330			316
	T3R1				18.1626			21.4985			16.9405			13.0641			6.37624			0.211			0.301667			0.294			0.364			0.231			261			287			303.667			333			312
	T3R1				18.1515			21.4119			17.6748			12.0059			6.49438			0.201667			0.302667			0.311333			0.333			0.247			262			300			310.667			337			326
	T3R2				18.2103			21.3543			16.8734			10.3999			5.77528			0.202			0.289667			0.323667			0.319667			0.187			251.667			293			297			334.333			328
	T3R2				18.5794			21.687			17.2662			11.0515			5.36937			0.215667			0.285667			0.308667			0.345333			0.193			255			283.333			297.667			332.667			319
	T3R2				18.4657			21.7378			16.5857			10.3147			5.16814			0.206667			0.307667			0.316333			0.302667			0.199			255.667			294			304.667			339			322
	T3R3				19.2743			22.5929			17.9656			8.86424			3.80488			0.214			0.283333			0.315			0.310333			0.142			250			288.667			294			335.333			324
	T3R3				19.5552			22.7478			18.331			9.51474			3.40741			0.209333			0.298			0.323333			0.312667			0.141			250.667			280.333			294.667			335			321
	T3R3				19.4378			22.595			17.6995			8.51561			3.536			0.209667			0.310667			0.319667			0.281667			0.152			252.667			290			304			338.667			326
	T4R1				17.8189			21.336			16.4399			12.2068			6.6747			0.201			0.270333			0.302			0.356667			0.231			260.333			299.333			302			331.667			322
	T4R1				18.1557			21.2261			16.6588			12.6222			6.25926			0.205667			0.296667			0.289			0.359			0.233			261.333			287.333			305			332.333			312
	T4R1				18.0292			21.2825			16.2706			11.9368			6.1875			0.187333			0.286			0.306333			0.349			0.242			260.667			299.333			313.333			337.333			314
	T4R2				17.9569			21.2446			16.5009			10.0837			5.69014			0.208333			0.287333			0.321			0.304333			0.189			254.333			293.333			297.333			332.333			322
	T4R2				18.1285			21.3547			16.8703			10.5415			5.2844			0.225			0.292333			0.296333			0.327667			0.186			255.333			283.667			296.667			334.333			315
	T4R2				18.2042			21.3437			16.5117			9.81471			5.45882			0.204333			0.284			0.313667			0.318333			0.196			256			292			306.333			340.333			316
	T4R3				19.2296			22.453			17.8245			9.78761			3.75439			0.222			0.289			0.302			0.292			0.136			249			290.333			295.333			334.667			326
	T4R3				19.3607			22.5529			18.1446			10.4319			3.34513			0.205667			0.294333			0.319333			0.305667			0.135			252.333			279.667			293.667			336.333			321
	T4R3				19.4181			22.5872			17.5965			9.64486			3.49153			0.206			0.307			0.315667			0.274667			0.146			253			291.333			303.333			339			328
				T1R1	19.3766	0.225808	a	22.6589	0.132951	a	17.8967	0.255829	a	13.872	0.348878	a	7.74965	0.293527	a	0.208667	0.00366667	ab	0.294111	0.00419435	a	0.310556	0.0180657	ab	0.355778	0.0110269	a	0.244333	0.00802081	a	251.444	5.48061	d	286.444	6.67777	f	296.444	3.23751	e	324.778	4.00463	f	310.333	1.52753	e
				T2R2	19.3273	0.157781	a	22.5818	0.10592	a	17.8888	0.281483	a	13.7125	0.471562	b	7.71858	0.30997	a	0.208778	0.00450103	ab	0.291222	0.00340479	a	0.309889	0.00400463	ab	0.354778	0.0109865	a	0.241	0.0072111	ab	255.222	1.38778	c	290.111	6.1584	e	300.889	5.01479	de	328.111	3.09719	e	312.333	3.05505	de
				AverageT1	19.352			22.6203			17.8927			13.7923			7.73412			0.208722			0.292667			0.310222			0.355278			0.242667			253.333			288.278			298.667			326.444			311.333
				T2R1	18.8325	0.0684186	b	21.974	0.0546175	b	17.3627	0.260423	b	13.1692	0.463151	c	7.18556	0.0974539	b	0.202889	0.0148037	abc	0.288556	0.00397678	a	0.303778	0.00831554	ab	0.36	0.00560753	a	0.201333	0.00550757	d	257.111	1.17063	c	292.556	5.69925	d	303.333	6.38575	cd	331	3.1798	d	314.667	5.85947	de
				T2R2	17.446	0.110168	e	20.7288	0.162885	e	15.951	0.228658	e	9.82442	0.442188	i	4.03268	0.169668	e	0.194333	0.00260342	c	0.280667	0.00735603	a	0.302444	0.00400463	ab	0.314222	0.0117063	bc	0.147667	0.0051316	f	265.667	0.57735	a	300.889	5.3886	b	310.778	5.3989	ab	331.444	4.11411	d	328.333	3.05505	ab
				T2R3	16.4382	0.121537	f	18.6293	0.107502	f	14.0352	0.222797	f	7.19782	0.466998	k	2.62771	0.101396	g	0.178556	0.0130824	d	0.264222	0.00844152	b	0.279667	0.0132958	c	0.280667	0.00622718	e	0.0926667	0.00626924	h	268.444	1.50308	a	303.333	7.23418	a	313.778	5.48061	a	334.778	3.67171	abc	331.333	6.50641	a
				AverageT2	17.5722			20.444			15.783			10.0638			4.61532			0.191926			0.277815			0.295296			0.318296			0.147222			263.741			298.926			309.296			332.407			324.778
				T3R1	18.044	0.19598	d	21.3729	0.148878	d	17.058	0.567171	bc	12.4639	0.543234	d	6.55544	0.216294	c	0.206222	0.00467063	abc	0.293222	0.0155003	a	0.304111	0.00902055	ab	0.352889	0.0172637	a	0.238667	0.00802081	bc	260.667	1.52753	b	295.667	7.50555	c	305.778	4.247	c	333.333	3.51188	c	318	7.2111	cd
				T3R2	18.4185	0.189025	c	21.593	0.208335	c	16.9084	0.341594	bcd	10.5887	0.403046	f	5.4376	0.309267	d	0.208111	0.00694689	ab	0.294333	0.0117189	a	0.316222	0.00750062	ab	0.322556	0.0214795	b	0.193	0.006	e	254.111	2.14303	cd	290.111	5.89098	e	299.778	4.247	de	335.333	3.28295	ab	323	4.58258	bc
				T3R3	19.4225	0.141076	a	22.6452	0.0887937	a	17.9987	0.317063	a	8.96486	0.507108	j	3.58276	0.202819	f	0.211	0.00260342	ab	0.297333	0.0136789	a	0.319333	0.00417665	a	0.301556	0.0172637	cd	0.145	0.00608276	f	251.111	1.38778	d	286.333	5.23874	f	297.556	5.591	e	336.333	2.02759	a	323.667	2.51661	bc
				AverageT3	18.6283			21.8704			17.3217			10.6725			5.19193			0.208444			0.294963			0.313222			0.325667			0.192222			255.296			290.704			301.037			335			321.556
				T4R1	18.0013	0.170145	d	21.2815	0.054951	d	16.4564	0.194584	d	12.2553	0.345246	e	6.37382	0.263028	c	0.198	0.00952774	bc	0.284333	0.0132455	a	0.299111	0.00902055	b	0.354889	0.00523167	a	0.235333	0.00585947	c	260.778	0.509175	b	295.333	6.9282	c	306.778	5.87209	bc	333.778	3.09719	bc	316	5.2915	de
				T4R2	18.0966	0.126721	d	21.3143	0.0606545	d	16.6277	0.210219	cd	10.1466	0.367456	g	5.47779	0.203532	d	0.212556	0.0109612	a	0.287889	0.00419435	a	0.310333	0.0126667	ab	0.316778	0.0117442	bc	0.190333	0.0051316	e	255.222	0.83887	c	289.667	5.23874	e	300.111	5.3989	de	335.667	4.16333	ab	317.667	3.78594	cd
				T4R3	19.3361	0.0966437	a	22.531	0.0697681	a	17.8552	0.275319	a	9.9548	0.419317	h	3.53035	0.20737	f	0.211222	0.00933532	ab	0.296778	0.00924562	a	0.312333	0.00913479	ab	0.290778	0.0155361	de	0.139	0.00608276	g	251.444	2.14303	d	287.111	6.46644	f	297.444	5.16756	e	336.667	2.18581	a	325	3.60555	b
				AverageT4	18.478			21.709			16.9798			10.7856			5.12732			0.207259			0.289667			0.307259			0.320815			0.188222			255.815			290.704			301.444			335.37			319.556
							a			a			a			a			a			ab			a			ab			a			a			d			f			e			f			e
							a			a			a			b			a			ab			a			ab			a			ab			c			e			de			e			de
							b			b			b			c			b			abc			a			ab			a			d			c			d			cd			d			de
							e			e			e			i			e			c			a			ab			bc			f			a			b			ab			d			ab
							f			f			f			k			g			d			b			c			e			h			a			a			a			abc			a
							d			d			bc			d			c			abc			a			ab			a			bc			b			c			c			c			cd
							c			c			bcd			f			d			ab			a			ab			b			e			cd			e			de			ab			bc
							a			a			a			j			f			ab			a			a			cd			f			d			f			e			a			bc
							d			d			d			e			c			bc			a			b			a			c			b			c			bc			bc			de
							d			d			cd			g			d			a			a			ab			bc			e			c			e			de			ab			cd
							a			a			a			h			f			ab			a			ab			de			g			d			f			e			a			b
			AT1R1
			AT1R1
			AT1R1
			AT1R2
			AT1R2
			AT1R2
			AT2R1
			AT2R1
			AT2R1
			AT2R2
			AT2R2
			AT2R2
			AT2R3
			AT2R3
			AT2R3
			AT3R1
			AT3R1
			AT3R1
			AT3R2
			AT3R2
			AT3R2
			AT3R3
			AT3R3
			AT3R3
			AT4R1
			AT4R1
			AT4R1
			AT4R2
			AT4R2
			AT4R2
			AT4R3
			AT4R3
			AT4R3
			BT1R1
			BT1R1
			BT1R1
			BT1R2
			BT1R2
			BT1R2
			BT2R1
			BT2R1
			BT2R1
			BT2R2
			BT2R2
			BT2R2
			BT2R3
			BT2R3
			BT2R3
			BT3R1
			BT3R1
			BT3R1
			BT3R2
			BT3R2
			BT3R2
			BT3R3
			BT3R3
			BT3R3
			BT4R1
			BT4R1
			BT4R1
			BT4R2
			BT4R2
			BT4R2
			BT4R3
			BT4R3
			BT4R3
	AT1R1				19.6155			22.5539			17.9169			13.7704			7.47541			0.212333			0.298			0.327667			0.351333			0.236			249.333			286			295.667			320.667			309
	AT1R1				19.1666			22.6145			17.6313			14.2604			7.71429			0.208667			0.294667			0.291667			0.347667			0.245			247.333			280			300			325			312
	AT1R1				19.3478			22.8084			18.1417			13.5852			8.05926			0.205			0.289667			0.312333			0.368333			0.252			257.667			293.333			293.667			328.667			310
	AT1R2				19.1453			22.4625			17.8108			13.5851			8.05839			0.208667			0.287333			0.309667			0.352667			0.235			253.667			293.667			297.667			326			315
	AT1R2				19.4252			22.6178			18.201			14.2347			7.64602			0.213333			0.292667			0.306			0.366667			0.239			255.667			283			298.333			326.667			309
	AT1R2				19.4114			22.665			17.6545			13.3178			7.45133			0.204333			0.293667			0.314			0.345			0.249			256.333			293.667			306.667			331.667			313
	AT2R1				18.754			21.911			17.2638			13.0341			7.29524			0.197333			0.284			0.307			0.362			0.196			256			295.333			300.333			329			319
	AT2R1				18.8794			22.0023			17.6581			13.6849			7.15254			0.219667			0.290333			0.294333			0.364333			0.201			258.333			286			299			329.333			308
	AT2R1				18.8641			22.0086			17.1663			12.7886			7.10891			0.191667			0.291333			0.31			0.353667			0.207			257			296.333			310.667			334.667			317
	AT2R2				17.3191			20.5534			15.9056			9.67148			4.22857			0.197333			0.287667			0.298333			0.302			0.149			265.333			304			308			328			331
	AT2R2				17.5161			20.8752			16.199			10.3228			3.9375			0.192667			0.281333			0.306333			0.325333			0.142			266.333			294.667			307.333			330.333			325
	AT2R2				17.503			20.7579			15.7485			9.479			3.93197			0.193			0.273			0.302667			0.315333			0.152			265.333			304			317			336			329
	AT2R3				16.2979			18.5569			13.9075			7.12601			2.73267			0.189333			0.256667			0.269333			0.281667			0.0867			267			308			309.667			332.333			338
	AT2R3				16.5122			18.5781			14.2924			7.69656			2.5303			0.182333			0.273333			0.275			0.286333			0.0921			270			295			311.667			333			325
	AT2R3				16.5043			18.7528			13.9055			6.77089			2.62016			0.164			0.262667			0.294667			0.274			0.0992			268.333			307			320			339			331
	AT3R1				17.8178			21.2085			16.5589			12.3217			6.7957			0.206			0.275333			0.307			0.361667			0.238			259			300			303			330			316
	AT3R1				18.1626			21.4985			16.9405			13.0641			6.37624			0.211			0.301667			0.294			0.364			0.231			261			287			303.667			333			312
	AT3R1				18.1515			21.4119			17.6748			12.0059			6.49438			0.201667			0.302667			0.311333			0.333			0.247			262			300			310.667			337			326
	AT3R2				18.2103			21.3543			16.8734			10.3999			5.77528			0.202			0.289667			0.323667			0.319667			0.187			251.667			293			297			334.333			328
	AT3R2				18.5794			21.687			17.2662			11.0515			5.36937			0.215667			0.285667			0.308667			0.345333			0.193			255			283.333			297.667			332.667			319
	AT3R2				18.4657			21.7378			16.5857			10.3147			5.16814			0.206667			0.307667			0.316333			0.302667			0.199			255.667			294			304.667			339			322
	AT3R3				19.2743			22.5929			17.9656			8.86424			3.80488			0.214			0.283333			0.315			0.310333			0.142			250			288.667			294			335.333			324
	AT3R3				19.5552			22.7478			18.331			9.51474			3.40741			0.209333			0.298			0.323333			0.312667			0.141			250.667			280.333			294.667			335			321
	AT3R3				19.4378			22.595			17.6995			8.51561			3.536			0.209667			0.310667			0.319667			0.281667			0.152			252.667			290			304			338.667			326
	AT4R1				17.8189			21.336			16.4399			12.2068			6.6747			0.201			0.270333			0.302			0.356667			0.231			260.333			299.333			302			331.667			322
	AT4R1				18.1557			21.2261			16.6588			12.6222			6.25926			0.205667			0.296667			0.289			0.359			0.233			261.333			287.333			305			332.333			312
	AT4R1				18.0292			21.2825			16.2706			11.9368			6.1875			0.187333			0.286			0.306333			0.349			0.242			260.667			299.333			313.333			337.333			314
	AT4R2				17.9569			21.2446			16.5009			10.0837			5.69014			0.208333			0.287333			0.321			0.304333			0.189			254.333			293.333			297.333			332.333			322
	AT4R2				18.1285			21.3547			16.8703			10.5415			5.2844			0.225			0.292333			0.296333			0.327667			0.186			255.333			283.667			296.667			334.333			315
	AT4R2				18.2042			21.3437			16.5117			9.81471			5.45882			0.204333			0.284			0.313667			0.318333			0.196			256			292			306.333			340.333			316
	AT4R3				19.2296			22.453			17.8245			9.78761			3.75439			0.222			0.289			0.302			0.292			0.136			249			290.333			295.333			334.667			326
	AT4R3				19.3607			22.5529			18.1446			10.4319			3.34513			0.205667			0.294333			0.319333			0.305667			0.135			252.333			279.667			293.667			336.333			321
	AT4R3				19.4181			22.5872			17.5965			9.64486			3.49153			0.206			0.307			0.315667			0.274667			0.146			253			291.333			303.333			339			328
	BT1R1				20.1117			26.9844			18.5984			13.4831			9.97163			0.221333			0.259333			0.273333			0.309667			0.228			260.667			280			282			310.333			307
	BT1R1				20.5424			26.1547			18.8476			14.0803			10.0725			0.232667			0.269			0.278333			0.304333			0.242			267.333			281			287.667			312.667			303
	BT1R1				20.4139			26.5171			18.5356			13.6402			10.1583			0.228333			0.268333			0.281			0.306			0.231			263			287.333			282.667			314.333			296
	BT1R2				20.4197			26.2107			18.6789			13.8879			10.1594			0.228			0.269333			0.281667			0.305667			0.229			263.667			287.333			285			320			309
	BT1R2				20.2973			26.369			18.2451			13.3419			9.94074			0.226667			0.262667			0.276667			0.308667			0.232			265.667			281.333			284.667			316.333			304
	BT1R2				20.2626			26.4542			18.6863			13.6745			9.79412			0.223333			0.264667			0.268333			0.301			0.238			267			285			289.333			315.333			299
	BT2R1				20.1431			26.0449			18.5872			13.6343			9.89189			0.234			0.270667			0.283			0.297333			0.229			267.333			289.667			285.667			322.333			312
	BT2R1				20.0722			26.0942			17.9736			13.1558			9.67568			0.218333			0.264			0.284333			0.31			0.235			268			283.667			288.333			318.667			307
	BT2R1				20.057			26.1812			18.4386			13.4223			9.37681			0.224667			0.272333			0.269667			0.292667			0.237			269.333			285.667			291.667			319			311
	BT2R2				19.0077			24.8123			17.3276			10.2742			7.03571			0.215			0.266			0.278667			0.284667			0.194			268.333			293.667			292.667			323.333			321
	BT2R2				18.9141			24.9545			16.9226			9.82441			6.82963			0.223333			0.249667			0.279667			0.281667			0.189			272			289			291			318			315
	BT2R2				18.7874			25.0993			17.2551			10.0629			6.93617			0.22			0.267667			0.265333			0.264			0.215			274.667			291.333			294			318.667			311
	BT2R3				18.7894			24.6103			17.1588			8.64403			5.94915			0.201333			0.252333			0.264667			0.265			0.156			272			295.667			291.667			325.667			327
	BT2R3				18.7365			24.7397			16.6624			8.2207			6.22609			0.216			0.245667			0.25			0.261667			0.152			274			291			293			319			316
	BT2R3				18.6557			24.8826			17.0705			8.43281			5.9823			0.206333			0.238			0.251333			0.260333			0.168			275.333			291.667			299			319.667			314
	BT3R1				19.9078			25.7447			18.2534			13.4244			9.69892			0.229667			0.261			0.289667			0.307			0.238			267			292			288.333			321.667			308
	BT3R1				19.8324			26.0282			17.7667			12.88			9.74257			0.234333			0.264			0.278			0.300333			0.231			269			283			289.333			319.667			315
	BT3R1				19.7029			25.9745			18.2242			13.3093			9.32584			0.224667			0.266			0.26			0.309			0.237			270.333			286.667			292.667			320			303
[truncated: 67 more rows]
[truncated: 195 more columns]

## Sheet: Figure4
Index		2020	SPAD															2021	SPAD																Index		2020	SPAD
[truncated: 550 more rows]
[truncated: 20 more columns]

[truncated: 3 more sheets: Figure4 (1), Figure5, Figure6]
